# Supplementary material for: Prediction of S-Nitrosylation Modification Sites Based on Kernel Sparse Representation Classification and mRMR Algorithm
Source: Biomed Res Int. 2014 Aug 12;2014:438341. doi: 10.1155/2014/438341 (PMC4145740; doi:10.1155/2014/438341)
Supplement: Supplementary file 1 — supplementary material S1:lists 645 protein sequences containing S-nitrosylation sites. supplementary material S2:lists both of the protein sequence Uniprot ids and S-nitrosylation site locations in the training and testing sets, respectively. supplementary material S3:presents the training set with 666 features. supplementary material S4:presents the testing set with 666 features. supplementary material S5:lists the order of the 666 features ranked by the mRMR algorithm. [file 438341.f1.zip]

Archive with 6 entries (6 files):
- S1.txt
- S2.xlsx
- S3.csv
- S4.csv
- S5.txt
- S6.txt
