# Supplementary material for: Prediction of S-Nitrosylation Modification Sites Based on Kernel Sparse Representation Classification and mRMR Algorithm
Source: Biomed Res Int. 2014 Aug 12;2014:438341. doi: 10.1155/2014/438341 (PMC4145740; doi:10.1155/2014/438341)
Supplement: Supplementary file 1 — supplementary material S1:lists 645 protein sequences containing S-nitrosylation sites. supplementary material S2:lists both of the protein sequence Uniprot ids and S-nitrosylation site locations in the training and testing sets, respectively. supplementary material S3:presents the training set with 666 features. supplementary material S4:presents the testing set with 666 features. supplementary material S5:lists the order of the 666 features ranked by the mRMR algorithm. [file 438341.f1.zip › S2.xlsx]

## Sheet: train_positive_sample 
Uniprot_id	sno_site
A2ATU0	393
O00151	73
O00159	802
O00220	336
O08709	47
O08749	484
O08807	54
O08997	41
O09173	138
O09173	14
O09173	21
O09173	377
O14508	111
O14979	177
O15355	13
O35215	24
O35215	57
O35433	616
O35433	621
O35488	427
O35490	131
O35490	256
O35490	299
O35490	300
O43175	281
O43175	369
O43390	292
O43707	499
O43707	793
O55022	129
O55143	560
O55229	72
O60443	156
O60610	1227
O70370	281
O70370	329
O70370	335
O75131	54
O75390	211
O75533	1059
O75688	172
O88451	60
O88506	533
O88587	234
O88767	106
O88767	121
O88767	46
O88989	137
O94760	222
O94760	274
O95573	450
O95671	274
P00329	101
P00329	104
P00329	112
P00329	171
P00329	175
P00329	196
P00329	212
P00329	98
P00403	196
P00403	200
P00493	106
P00523	498
P00533	190
P00533	291
P00533	311
P00533	329
P00533	470
P00558	108
P00558	367
P00558	379
P00558	50
P00558	99
P00561	280
P00561	501
P00586	248
P00750	118
P00784	158
P00966	132
P01009	256
P01027	873
P01111	118
P02088	94
P02545	522
P02730	201
P02730	317
P02766	10
P02769	288
P02769	392
P02769	471
P02769	58
P02792	127
P03206	189
P03369	557
P03369	585
P04075	240
P04075	339
P04075	73
P04642	163
P04904	212
P04905	87
P04906	102
P04906	48
P05089	303
P05109	42
P05202	106
P05202	187
P05202	295
P05388	119
P05388	27
P05976	181
P06213	1165
P06213	1261
P06744	404
P06753-2	170
P07014	75
P07237	312
P07237	397
P07237	400
P07237	53
P07237	56
P07323	270
P07323	357
P07814	856
P07900	420
P07900	481
P07900	597
P07900	598
P08142	298
P08249	89
P08551	323
P08839	324
P09373	123
P09382	43
P09382	61
P09605	317
P09606	269
P0A6K6	267
P0A7L8	53
P0A7M2	5
P0A7M9	18
P0A7M9	37
P0A7Q1	61
P0A7S3	27
P0A7V8	32
P0A7Z4	176
P0A853	298
P0A862	82
P0A9X4	113
P0AC53	10
P0ACQ4	199
P0AFC7	102
P0AG44	100
P0AGE9	124
P0C8J6	124
P0C8J8	159
P10242	130
P10415	158
P10415	229
P10599	62
P10599	69
P10599	73
P10605	319
P10620	50
P10809	237
P10809	442
P10809	447
P11442	151
P11442	870
P11506	487
P11506	497
P11506	571
P11926	360
P11980	326
P11980	358
P11980	423
P11980	474
P11980	49
P12004	162
P12004	81
P12268	140
P12268	173
P12658	100
P12710	69
P12970	199
P12979	61
P12979	65
P12979	70
P13010	249
P13010	493
P13444	121
P13489	248
P13489	38
P13489	409
P13489	75
P13489	85
P13639	369
P13639	41
P13639	567
P13639	651
P13640	34
P13640	35
P13640	37
P13640	38
P13707	341
P14115	144
P14131	25
P14211	163
P14854	54
P14866	581
P14873	1913
P14873	1936
P14873	2357
P16015	182
P16015	187
P16015	66
P16331	265
P17117	9
P17425	417
P17563	31
P17563	371
P17563	8
P17751	127
P17751	218
P17987	357
P18031	215
P18031	32
P18031	92
P18760	139
P19246	225
P19246	263
P19686	243
P19838	61
P20337	184
P20595	122
P20651	478
P20810	661
P21980	10
P21980	143
P21980	230
P21980	269
P21980	27
P21980	277
P21980	285
P21980	371
P22102	41
P22314	234
P22460	331
P22460	346
P23229	131
P23229	541
P23229	86
P23284	202
P23396	97
P23919	31
P23975	351
P24270	425
P24270	460
P24456	446
P25113	153
P25113	55
P25688	141
P25688	95
P25779	147
P26443	112
P26443	172
P26443	254
P27140	280
P27659	114
P27695	310
P27695	65
P27695	93
P27773	244
P27816	635
P28651	201
P28663	103
P29101	293
P29147	221
P29350	453
P29474	1048
P29474	1050
P29474	1114
P29474	184
P29474	212
P29474	661
P29474	802
P29474	94
P29474	99
P29474	991
P29680	50
P29758	150
P30044	100
P30050	141
P30084	213
P30154	402
P30519	282
P30556	289
P30713	50
P31327	600
P31596	562
P31749	224
P31749	296
P31749	310
P31943	267
P31949	13
P32020	495
P32132	537
P33937	67
P34914	230
P35247	40
P35505	408
P35557	371
P35579	569
P35579	896
P35579	91
P35579	917
P35754	79
P35754	8
P35754	83
P36578	208
P36578	250
P36578	96
P37040	472
P38060	141
P38060	307
P38646	487
P38646	608
P40227	406
P41091	236
P41216	109
P41216	242
P41216	298
P41216	55
P41567	69
P42704	930
P43243	806
P45880	47
P45880	76
P45983	116
P46459	21
P46459	250
P46459	264
P46459	91
P46777	100
P46777	76
P46782	155
P46782	172
P47712	151
P47860	81
P47942	248
P47942	504
P48039	127
P48039	130
P48200	178
P48507	35
P48768	537
P48776	266
P49368	213
P49411	290
P49429	103
P50172	241
P50172	78
P50247	195
P50247	228
P50544	238
P50570	27
P50570	607
P50570	86
P50990	148
P50990	149
P50991	295
P50991	379
P50995	294
P51174	166
P51174	342
P51660	189
P51660	277
P51859	12
P51881	160
P52197	230
P52272	676
P52840	283
P52840	82
P54071	113
P55072	522
P55096	24
P55264	105
P55264	352
P56537	11
P56537	15
P56558	610
P57776	217
P58710	19
P58710	360
P59215	140
P60203	201
P60422	188
P60422	6
P60710	217
P60710	257
P60710	272
P60710	374
P61088	87
P61247	201
P61620	13
P61765	110
P61979	132
P62241	100
P62258	97
P62258	98
P62264	85
P62280	131
P62702	181
P62702	41
P62754	12
P62815	162
P62826	120
P62830	28
P62858	27
P62888	52
P62897	15
P62897	18
P62962	128
P62979	144
P62979	145
P62979	149
P63085	159
P63242	73
P63276	35
P63318	296
P64463	52
P68036	86
P68104	111
P68370	295
P68370	315
P68370	316
P68370	347
P68370	376
P70288	262
P70288	274
P70296	133
P70310	153
P76243	5
P78347	475
P84076	185
P84076	38
P84086	105
P84086	90
P97494	501
P97501	197
P97501	397
P98170	12
P98170	213
P98170	300
P98170	303
P98170	327
P98170	351
Q00195	460
Q00981	152
Q00987	77
Q01405	180
Q03265	244
Q04206	38
Q05421	261
Q05421	268
Q05421	437
Q05421	488
Q05586	744
Q05586	798
Q05683	45
Q05816	120
Q05816	127
Q05816	43
Q05920	131
Q05920	663
Q07009	301
Q07065	100
Q08163	92
Q08211	1029
Q08211	12
Q09429	717
Q12765	324
Q12879	320
Q12879	399
Q12879	87
Q13838	165
Q14151	224
Q14498	478
Q14699	211
Q14980	80
Q15021	286
Q15208	234
Q15233	145
Q15631	225
Q16623	145
Q3U0V1	297
Q3UEG6	199
Q3UEG6	463
Q3ULD5	267
Q5HZV9	112
Q5U2N3	259
Q60598	112
Q60676	77
Q60864	26
Q60864	461
Q61990	158
Q62418	127
Q63886	225
Q63886	282
Q64374	207
Q64374	262
Q64442	350
Q64459	469
Q64467	351
Q64516	299
Q64521	270
Q68FL6	789
Q6RJR6	47
Q6ZPY7	1187
Q6ZWV3	105
Q78JT3	23
Q78PY7	31
Q78PY7	96
Q80UJ7	322
Q80XL6	546
Q8BGA8	342
Q8BH00	247
Q8BH00	354
Q8BP47	277
Q8BUV3	284
Q8BW75	26
Q8BWF0	422
Q8BWT1	179
Q8C5H8	181
Q8CHT0	314
Q8CHT0	94
Q8K010	497
Q8K2B3	238
Q8K2B3	266
Q8NBI5	226
Q8QZT1	139
Q8R086	265
Q8R086	300
Q8R0F9	128
Q8R0F9	135
Q8R0F9	355
Q8R0Y6	17
Q8R0Y6	404
Q8R0Y6	662
Q8TAQ2	145
Q8TAT6	188
Q8VC12	265
Q8VC30	382
Q8VCH0	177
Q8VCH0	218
Q8VCN5	136
Q8VCN5	171
Q8VDN2	663
Q8VDN2	705
Q8VEM8	272
Q8VEM8	52
Q8WX93	964
Q91V76	187
Q91V76	226
Q91V92	20
Q91V92	623
Q91V92	835
Q91VR2	103
Q91W43	230
Q91W43	762
Q91WN4	139
Q91WN4	299
Q91X91	111
Q91X91	159
Q91XD4	438
Q91XD4	57
Q91YI0	129
Q91YQ5	478
Q91YQ5	546
Q920E5	332
Q921G7	117
Q921G7	247
Q921G7	585
Q921G7	588
Q923E4	387
Q949U7	121
Q96C19	172
Q96HC4	213
Q96KR1	525
Q99439	164
Q99439	61
Q99683	869
Q99798	592
Q99832	364
Q99832	450
Q99836	113
Q99836	216
Q99K51	33
Q99LB7	382
Q99LB7	498
Q99LC5	109
Q99MK8	340
Q99MK8	72
Q99MZ7	43
Q99P30	223
Q99PL5	1136
Q99PL5	1198
Q9BUH6	180
Q9BUJ2	377
Q9BY89	842
Q9CPR4	144
Q9CPR4	15
Q9CPR4	57
Q9CQN1	135
Q9CY27	18
Q9CZ13	380
Q9CZ13	410
Q9D0I9	638
Q9D1Q6	92
Q9D6M3	271
Q9D6M3	52
Q9D6Y9	473
Q9D7S9	20
Q9D826	299
Q9D826	319
Q9D826	333
Q9DBA8	189
Q9DBF1	478
Q9DBM2	17
Q9DCW4	42
Q9DGJ2	10
Q9EQQ9	596
Q9ET01	446
Q9ET01	450
Q9FYE1	147
Q9GZT4	113
Q9H3S7	1466
Q9I4E3	249
Q9JIF0	272
Q9JII6	260
Q9NWZ5	317
Q9NZJ9	131
Q9QXD6	39
Q9QXE0	264
Q9QXE0	415
Q9QXF8	147
Q9QXF8	186
Q9QXF8	247
Q9QXX4	566
Q9QYC0	525
Q9QZ06	229
Q9UL62	553
Q9ULC4	14
Q9UQM7	6
Q9WTX5	120
Q9WTX5	160
Q9Y314	8
Q9Y490	1939
Q9Y696	234
Q9Z0X1	255
Q9Z1Q9	681

## Sheet: test positive_samples
Uniprot_id	sno_site
P51787	445
Q9CQN1	263
Q9Y272	11
O70145	291
P14780	99
D3ZUQ0	47
P35579	988
O88989	154
P03995	291
Q9QUR7	115
Q99MK8	120
Q8QZT1	193
Q9QXE0	243
Q64442	179
O35831	233
P29474	201
O88767	53
P68104	234
P60710	285
P68104	411
P62888	92
P37040	566
P69905	105
Q9UPN9	582
P26641	194
P29474	976
P05089	168
O35490	217
O14920	179
P49327	1471
Q9BUJ2	487
P29067	410
P13033	284
Q8BVI4	158
P04271	85
P20810	408
P09651	43
P05793	45
Q8VCH0	123
Q9UQM7	280
P0C8J8	149
P55072	105
P10637	614
Q9DC50	210
P98170	90
Q91YI0	307
Q99LB7	672
P29474	853
P93002	156
P16331	445
P13448	113
P53621	245
Q8VDJ3	948
P21980	98
P42574	163
P28903	466
P50398	317
P68066	31
P0A6L2	218
P21980	370
P30084	225
Q8VCH0	381
P17987	76
P0A7M9	16
Q9UL62	558
P00558	380
Q8BWT1	287
O00233	81
O15519	259
P35505	315
P63389	602
Q8R0Y6	587
P00888	250
Q02293	299
P25372	92
P25444	229
P14873	2460
Q9CPY7	445
Q00519	828
P21980	336
P18206	85
Q66HA8	34
P49368	173
Q9D0F9	374
P06213	1272
P47955	61
O55143	998
Q9H2C0	464
Q9NQC3	1101
Q9D0R2	655
Q7TNG8	439
P21980	545
P21980	524
P54071	418
O55081	50
P21980	620
P06213	1083
P13640	42
P35505	396
P63244	249
Q923E4	390
O15519	254
P35247	35
Q9DBG1	230
Q63880	100
P05161	78
P62826	112
Q99MK8	619
Q9JII6	46
P17987	147
P37040	630
Q16665	520
P77252	9
Q86VP6	1007
Q05920	752
O43707	351
Q5SWU9	812
Q61990	109
Q16665	800
O75688	163
Q9ULA0	327
Q99MK8	439
O00429	367
O00429	644
O70251	50
P04083	324
P04083	343
P07355	133
P08670	328
P0A9P0	392
P10111	161
P11142	574
P11142	603
P13221	83
P15121	299
P17717	128
P23297	86
P23686	114
P24942	186
P30048	229
P31947	38
P33267	267
P33267	436
P33267	487
P43235	139
P46660	54
P47738	321
P47738	388
P47738	68
P61080	85
P70694	188
P70694	193
P70694	206
P70694	98
Q07076	338
Q13509	12
Q6XVG2	372
Q8CAY6	360
Q8CAY6	65
Q8JZN5	331
Q8JZN5	617
Q9EQF5	220
Q9EQF5	242
Q9EQF5	483
Q9QX80	104
