# Supplementary material for: Prediction of S-Nitrosylation Modification Sites Based on Kernel Sparse Representation Classification and mRMR Algorithm
Source: Biomed Res Int. 2014 Aug 12;2014:438341. doi: 10.1155/2014/438341 (PMC4145740; doi:10.1155/2014/438341)
Supplement: Supplementary file 1 — supplementary material S1:lists 645 protein sequences containing S-nitrosylation sites. supplementary material S2:lists both of the protein sequence Uniprot ids and S-nitrosylation site locations in the training and testing sets, respectively. supplementary material S3:presents the training set with 666 features. supplementary material S4:presents the testing set with 666 features. supplementary material S5:lists the order of the 666 features ranked by the mRMR algorithm. [file 438341.f1.zip › S3.csv]

class	AA1_disorder	AA1_pssm_1	AA1_pssm_2	AA1_pssm_3	AA1_pssm_4	AA1_pssm_5	AA1_pssm_6	AA1_pssm_7	AA1_pssm_8	AA1_pssm_9	AA1_pssm_10	AA1_pssm_11	AA1_pssm_12	AA1_pssm_13	AA1_pssm_14	AA1_pssm_15	AA1_pssm_16	AA1_pssm_17	AA1_pssm_18	AA1_pssm_19	AA1_pssm_20	AA1_ss_1	AA1_ss_2	AA1_ss_3	AA1_sa_1	AA1_sa_2	AA1_Codon diversity	AA1_Electrostatic charge	AA1_Molecular volume	AA1_Polarity	AA1_Secondary structure	AA2_disorder	AA2_pssm_1	AA2_pssm_2	AA2_pssm_3	AA2_pssm_4	AA2_pssm_5	AA2_pssm_6	AA2_pssm_7	AA2_pssm_8	AA2_pssm_9	AA2_pssm_10	AA2_pssm_11	AA2_pssm_12	AA2_pssm_13	AA2_pssm_14	AA2_pssm_15	AA2_pssm_16	AA2_pssm_17
1	0.42514	-4	-4	-4	-6	-5	-4	-4	-6	2	-4	-3	-4	-3	1	-5	-4	-4	0	9	-4	0	0	1	0	1	-0.838	1.512	3.097	0.26	0.83	0.41872	2	-5	-4	-5	9	-4	-4	-4	-5	-4	-4	-4	-4	-5	3	2	-1
1	0.32927	-4	1	0	-4	-5	1	-3	-5	9	-1	-1	-2	-3	0	-5	-4	-4	-4	2	-3	1	0	0	1	0	-1.474	-0.078	-1.673	0.336	-0.417	0.34741	2	-1	0	0	-1	0	-1	0	-2	-2	0	0	-1	-4	1	2	0
1	0.092795	-3	6	-1	0	-6	0	0	-3	0	-3	-3	3	0	-2	-5	-4	-1	-5	-4	-3	1	0	0	0	1	0.44	2.897	1.502	1.538	-0.055	0.12013	-1	2	-1	-4	1	0	-3	4	-1	-3	-4	1	3	-5	-1	0	-2
1	0.91891	0	-2	0	-1	5	0	-1	0	-1	-1	0	-2	-1	-4	2	1	0	1	0	1	0	0	1	1	0	1.242	-1.262	-0.544	-1.337	-0.279	0.91761	-1	1	1	-2	-4	0	1	-1	1	0	-3	-2	-4	-1	-1	0	3
1	0.015618	-4	-5	-5	-5	-4	-5	-5	-5	-3	-2	-1	-5	-2	9	-5	-4	-4	-1	1	-3	0	1	0	1	0	-0.397	0.412	1.891	-1.006	-0.59	0.013965	-1	-4	-2	-3	-4	-3	-3	-3	-3	-4	-4	-3	-4	4	0	6	-2
1	0.069996	-1	1	-2	-1	-2	-2	-2	6	-3	-6	-6	0	-4	-5	-4	-1	-4	-5	-4	-4	0	0	1	0	1	1.045	2.064	1.33	-0.384	1.652	0.082976	6	-4	-4	-4	3	-3	-4	1	-4	-2	-3	-3	2	-5	-4	0	-2
1	0.81881	0	-1	-1	2	-3	0	4	-3	-1	-2	-1	1	-2	-3	0	1	-1	-4	-3	1	0	0	1	0	1	-0.259	-3.242	-3.656	1.05	0.302	0.81866	0	0	2	2	-3	1	3	0	-2	-2	-3	-1	-3	-4	0	1	-1
1	0.14196	1	-5	-5	-6	-4	-3	-5	-5	-4	2	-1	-3	-2	4	-5	-2	0	-4	3	5	0	1	0	1	0	-0.397	0.412	1.891	-1.006	-0.59	0.13274	-3	-2	3	4	-5	0	4	-4	-1	-4	-6	0	-5	-6	-2	2	0
1	0.25498	-2	3	5	-2	-4	3	-2	-1	1	-4	-2	1	0	0	-1	0	-3	-4	-3	-4	0	0	1	0	1	-0.169	0.933	1.299	0.945	0.828	0.20126	2	-1	2	0	-1	0	0	0	4	-2	-4	-2	-1	-2	-2	1	0
1	0.66719	-2	-3	-4	-5	-3	-3	-4	-4	1	0	3	-4	0	0	0	-3	-2	-1	6	-1	1	0	0	1	0	1.266	-0.912	-1.505	-1.019	-0.987	0.63767	-1	2	-1	1	-4	3	3	-1	-1	-4	-4	3	-3	-5	-2	1	0
1	0.44788	0	-3	2	0	-3	-1	-3	6	-2	-5	-5	-3	-4	-5	-4	-2	-3	-4	-5	-5	0	0	1	1	0	1.045	2.064	1.33	-0.384	1.652	0.46967	-2	-2	7	-1	-2	-1	-2	-1	-1	-4	-5	-2	-4	-5	-3	2	-1
1	0.4969	1	-2	-3	-3	5	1	-3	2	0	-1	-2	-1	3	-3	-1	1	1	-4	-2	0	0	0	1	1	0	1.57	-0.146	-0.733	-0.591	-1.302	0.48367	-3	-4	-3	-5	-4	-4	-4	4	2	-3	1	-4	7	0	-5	-2	-4
1	0.091042	-2	1	3	4	-5	1	1	2	0	-5	-4	0	-5	-6	-2	-1	-2	-6	-5	-4	0	0	1	0	1	-0.259	-3.242	-3.656	1.05	0.302	0.10713	-2	-1	1	0	0	0	0	5	2	-3	-4	-1	-2	-5	-1	0	-3
1	0.23676	-4	-3	-3	-4	-5	-3	-3	-5	8	-3	-4	-4	-4	1	-5	-4	-4	-2	7	-4	1	0	0	1	0	-0.838	1.512	3.097	0.26	0.83	0.19562	-4	-5	-5	-6	1	-5	-5	-5	-4	-3	-1	-5	-1	8	-4	-1	-4
1	0.76546	4	-3	0	-2	-3	5	-1	0	-3	0	-3	-2	-1	-4	-1	-1	-1	-4	-4	-1	0	0	1	0	1	1.57	-0.146	-0.733	-0.591	-1.302	0.74885	-2	-3	-4	-5	-4	-4	-4	-3	-1	1	0	-4	-2	4	-2	1	2
1	0.30426	0	1	1	4	-2	1	1	0	-1	-5	-5	2	-4	-3	-3	1	-1	-5	-3	-2	1	0	0	0	1	0.44	2.897	1.502	1.538	-0.055	0.3104	-1	-3	-2	1	-1	0	2	-4	-4	3	-1	-2	-1	1	-4	-3	-1
1	0.068462	0	2	0	1	3	1	-1	-1	0	-1	-1	-1	2	-3	4	-1	-1	0	-3	-2	0	0	1	0	1	0.908	1.313	2.213	-0.032	0.326	0.081561	-4	-3	-5	-6	-4	-4	-5	-6	-5	3	3	-4	8	1	-5	-4	-2
1	0.68902	0	0	0	-1	-2	1	1	0	3	-2	-3	1	-2	-3	-1	2	0	-4	0	-1	0	0	1	0	1	0.67	-2.647	-4.76	-0.228	1.399	0.67801	0	-1	-1	0	1	0	-1	-2	-1	-1	2	-1	0	1	0	0	2
1	0.75202	0	-1	-1	0	-2	-1	1	1	-1	-2	-1	0	-1	-1	-1	3	1	-3	-1	0	0	0	1	0	1	0.67	-2.647	-4.76	-0.228	1.399	0.7783	0	-1	2	-1	-1	0	0	-1	0	1	0	0	-1	0	2	0	0
1	0.20172	1	-3	-1	-3	5	-2	-2	-2	-3	-1	1	-3	0	-2	-1	-2	-1	-3	-3	4	0	0	1	1	0	1.242	-1.262	-0.544	-1.337	-0.279	0.16041	1	-1	-3	-1	-4	0	0	1	-4	-5	-4	1	-4	-5	6	-1	-2
1	0.092268	1	-4	1	2	-4	-2	-3	1	-4	-4	-5	-4	-5	-6	-2	5	1	-6	-5	-1	0	1	0	1	0	1.045	2.064	1.33	-0.384	1.652	0.1171	-4	-6	-6	-6	-2	-5	-6	-7	-6	6	2	-5	5	-2	-6	-5	-4
1	0.11226	3	-3	-1	0	6	-3	-2	-2	-2	-1	-3	-3	-1	-2	-2	2	-1	-4	-4	2	0	1	0	1	0	0.67	-2.647	-4.76	-0.228	1.399	0.10374	-3	-1	-2	-3	-2	3	-2	-2	3	-1	0	1	2	-1	-1	-2	-3
1	0.048878	2	3	-4	-5	0	-1	-2	-4	0	1	1	-2	-1	0	-5	-3	-3	1	3	2	1	0	0	1	0	-0.838	1.512	3.097	0.26	0.83	0.036341	1	-1	1	4	-3	1	4	-3	-1	-4	-4	1	-3	-5	-2	-1	-2
1	0.036341	1	-1	1	4	-3	1	4	-3	-1	-4	-4	1	-3	-5	-2	-1	-2	-3	-4	-4	1	0	0	0	1	-0.169	0.933	1.299	0.945	0.828	0.02579	2	-2	-1	-1	-1	1	0	-3	-2	-1	3	-1	1	1	-4	0	-3
1	0.32894	1	0	-3	-1	-4	-1	1	-3	-4	-3	-5	1	-4	-6	7	-1	-2	-6	-5	-3	1	0	0	0	1	1.57	-0.146	-0.733	-0.591	-1.302	0.2781	-3	-4	-6	-6	-4	-5	-5	-6	-5	0	6	-5	0	0	-5	-3	-4
1	0.13247	1	2	0	0	0	3	2	-2	1	-4	-3	-2	-2	-3	-3	2	-2	-1	1	-2	0	0	1	0	1	-0.503	-1.853	-3.005	0.931	-0.179	0.16148	-2	-3	-3	-3	-5	-4	-3	7	-4	-6	-6	-4	-5	-5	-5	-1	-3
1	0.43264	1	1	-1	1	0	0	-1	-3	-3	-2	-1	0	-2	-3	4	-1	1	-4	-4	-1	0	0	1	0	1	0.421	-1.392	-1.628	0.189	2.081	0.43319	-1	0	1	5	-1	2	0	-1	0	-4	-3	0	-2	-3	-2	0	0
1	0.37939	1	0	1	2	-5	1	3	-3	1	-2	-4	2	-3	-3	1	0	0	-6	-5	-2	1	0	0	0	1	-1.474	-0.078	-1.673	0.336	-0.417	0.33144	1	3	1	1	-5	2	3	-4	0	-4	-4	1	-4	-2	-2	0	-1
1	0.45175	-1	-3	3	-1	-5	2	0	4	-4	-2	-2	0	-4	-4	-1	-1	1	-5	-2	-4	0	0	1	0	1	1.045	2.064	1.33	-0.384	1.652	0.45722	1	2	-3	-2	-3	1	-1	-2	-1	1	1	1	2	-1	-5	1	2
1	0.18746	-2	4	-1	-3	3	0	-2	-3	2	-1	-2	3	-2	-3	-3	-1	1	-4	-1	1	0	0	1	1	0	0.44	2.897	1.502	1.538	-0.055	0.20089	-3	0	1	6	-4	-2	1	-1	-2	-4	-4	-2	-4	-3	-3	-2	-3
1	0.2641	0	1	1	1	-3	2	4	-3	-1	-2	-2	0	-1	-2	-3	0	0	-3	-1	-3	1	0	0	0	1	0.113	-0.837	1.477	1.357	-1.453	0.25498	-2	-3	-3	-2	-3	-2	-2	-3	-2	-1	2	-2	7	2	-3	-3	-2
1	0.25504	-1	4	1	-2	-3	-2	0	-2	-2	-3	-4	3	-4	-5	3	1	-2	-5	-4	-3	0	0	1	0	1	0.44	2.897	1.502	1.538	-0.055	0.27891	-3	3	3	3	-2	1	0	-2	3	-5	-3	1	-4	-5	-2	1	-1
1	0.58792	-2	2	-3	-1	-6	6	2	-3	-3	-5	-5	3	-4	-6	-4	-1	-3	-5	-4	-3	1	0	0	0	1	-0.503	-1.853	-3.005	0.931	-0.179	0.54047	-1	-3	-3	0	3	1	2	-4	-3	0	-1	0	2	0	-3	2	0
1	0.87213	3	1	-1	-3	-2	-2	-1	3	-2	-2	-5	0	-4	-5	-1	2	0	-5	-2	-3	0	0	1	0	1	1.045	2.064	1.33	-0.384	1.652	0.87192	-2	3	-2	0	-5	0	0	-2	-4	-3	-3	4	-1	-5	3	-2	-1
1	0.25506	-4	-4	-5	-6	-5	-4	-5	-6	-1	-4	-4	-5	-4	1	-6	-3	-4	0	10	-4	0	0	1	1	0	-0.838	1.512	3.097	0.26	0.83	0.2487	-2	2	-1	0	-5	2	0	-1	2	-5	-4	4	-3	-4	-4	4	-1
1	0.054695	-3	-5	-6	-6	-4	-5	-6	-5	-5	6	0	-5	4	3	-6	-5	-3	-3	-3	2	0	1	0	1	0	0.393	0.816	2.131	-1.239	-0.547	0.057625	-4	6	-2	-4	-6	-1	-2	-5	-1	-4	0	4	2	-3	-5	-3	-4
1	0.067847	-1	4	-1	-3	-5	1	-2	-1	0	-2	-4	5	-2	-5	-1	-1	0	-2	-3	-1	0	0	1	0	1	-0.169	0.933	1.299	0.945	0.828	0.071631	-2	0	4	2	-3	-1	1	2	2	-5	-4	1	-3	-4	-3	0	-2
1	0.27817	-3	-1	-3	-1	0	2	6	-4	-3	-2	-1	1	-2	-1	-2	-2	-2	-4	-3	-3	0	1	0	0	1	0.113	-0.837	1.477	1.357	-1.453	0.24339	-1	-2	-3	-3	0	-2	-2	-3	-1	3	1	-2	-1	2	-1	-3	-1
1	0.098908	3	-3	-1	5	-3	2	-2	-3	-2	-4	-4	-3	-1	-4	-3	2	0	-5	-4	-2	1	0	0	1	0	-0.259	-3.242	-3.656	1.05	0.302	0.090637	3	-4	-3	-4	3	-3	-3	-3	-4	2	-3	-3	-1	-3	-4	3	2
1	0.35117	-2	-3	-2	3	-4	-2	-2	-4	0	-2	-1	0	1	4	-4	0	0	-1	5	-3	0	0	1	0	1	-0.838	1.512	3.097	0.26	0.83	0.31421	0	-1	-4	-5	-2	-3	-4	-4	-4	3	-1	-3	-1	2	-4	-3	-2
1	0.066962	5	-4	-3	-4	-1	-4	-3	-2	-1	-1	-2	-4	-2	-3	2	-1	0	-5	-3	2	0	1	0	1	0	1.242	-1.262	-0.544	-1.337	-0.279	0.085254	-2	-2	-3	-3	1	-1	0	-4	1	4	1	1	0	0	-4	-3	-3
1	0.008019	2	0	-2	4	-4	1	-3	-4	3	-2	1	0	-3	-4	-5	-1	-2	-6	-3	-1	1	0	0	1	0	-0.259	-3.242	-3.656	1.05	0.302	0.006991	2	3	-1	1	-3	3	2	-2	-3	-4	-2	3	-4	-6	-4	0	-2
1	0.22112	-2	5	-2	-3	-4	-1	-1	-3	-2	-4	-4	6	-3	-4	-3	-1	-2	-4	-3	-4	0	0	1	0	1	-0.277	1.648	0.533	1.831	-0.561	0.2016	-1	-3	1	-2	-3	0	0	-3	-3	-3	-3	-2	-3	-1	-1	4	4
1	0.10343	1	2	-1	3	-5	1	4	-3	0	-5	-5	3	-4	-5	-1	-2	-3	-6	-5	-3	1	0	0	0	1	1.57	-0.146	-0.733	-0.591	-1.302	0.11399	-1	1	-3	-3	0	-2	-4	-4	4	-1	-1	-3	-2	1	-5	-3	-2
1	0.1049	1	-1	2	2	-3	-1	1	-4	4	-2	-2	-1	1	2	-5	-1	-2	-3	1	0	1	0	0	1	0	0.113	-0.837	1.477	1.357	-1.453	0.066578	2	0	2	1	-4	1	3	-2	-2	-4	-2	2	-2	-4	-4	0	-1
1	0.009903	2	-5	-5	-6	-3	-5	-4	-4	-5	3	1	-5	0	-1	-2	-3	0	-5	-2	5	1	0	0	1	0	1.57	-0.146	-0.733	-0.591	-1.302	0.019639	-3	-5	-6	-6	-2	-5	-6	-6	-6	0	6	-5	0	1	-3	-5	-4
1	0.072093	4	-5	-5	-5	-1	-5	-4	-4	-5	3	0	-5	-2	-3	-5	-3	-3	-5	-3	4	0	1	0	1	0	1.57	-0.146	-0.733	-0.591	-1.302	0.071736	1	-4	-3	-3	-3	-4	-2	4	-4	-5	-6	-3	-5	-5	-4	5	0
1	0.051448	-3	-5	-5	-6	-1	-5	-5	-2	-5	6	4	-5	0	0	-5	-2	-3	-5	-3	1	0	1	0	1	0	0.393	0.816	2.131	-1.239	-0.547	0.046323	-3	-5	-3	-5	3	-5	-5	-2	-5	2	-1	-5	0	-2	-5	-3	-1
1	0.44551	-2	-3	-3	-1	-1	-4	-2	-5	-2	5	3	-2	0	0	-3	-4	-1	-5	-3	3	0	1	0	1	0	1.266	-0.912	-1.505	-1.019	-0.987	0.3882	1	0	-2	1	-3	-2	3	-3	0	-1	-3	-1	-3	-5	1	0	2
1	0.27602	-2	-2	-1	-1	-6	1	7	-5	1	-5	-4	-2	-2	-5	-3	-3	-1	-4	-5	-4	1	0	0	1	0	0.113	-0.837	1.477	1.357	-1.453	0.25356	-1	-6	-6	-7	0	-6	-6	-6	-3	3	4	-5	0	4	-3	-4	-4
1	0.046155	3	1	-2	-4	-4	-1	-4	0	-5	1	1	1	2	-3	-4	0	-1	-5	-3	1	1	0	0	1	0	1.266	-0.912	-1.505	-1.019	-0.987	0.038746	-4	-5	-6	-6	-4	-5	-6	-6	-5	1	5	-5	3	4	-6	-5	2
1	0.93163	0	1	-2	1	-4	2	1	-3	3	-4	-3	1	3	-4	2	1	1	-4	-3	-3	0	0	1	0	1	0.113	-0.837	1.477	1.357	-1.453	0.91965	1	1	-3	-3	-4	2	-3	0	5	-1	-2	0	-3	0	2	1	1
1	0.31363	-3	-5	-5	-5	-3	-5	-5	-6	-5	7	2	-5	-1	-2	-5	-4	-3	-5	-3	2	0	1	0	1	0	0.393	0.816	2.131	-1.239	-0.547	0.3468	0	-4	-4	-4	-2	-3	-3	-4	-4	-3	-2	-3	-3	-5	8	-3	-1
1	0.38012	-4	-4	-4	-5	2	-4	-4	-5	-1	-2	-2	-4	-3	5	-3	-3	-4	0	8	-2	0	0	1	1	0	-0.397	0.412	1.891	-1.006	-0.59	0.43062	-1	-3	-2	-4	-3	0	-3	-3	-4	2	0	-3	0	-3	-4	-1	6
1	0.60157	-1	3	-1	-1	-5	0	1	-4	-3	-2	-3	5	-2	-5	1	0	-1	-5	-3	-3	1	0	0	0	1	0.44	2.897	1.502	1.538	-0.055	0.61687	-1	-2	-2	-4	1	-3	-4	-4	4	-2	-2	-4	-1	6	-4	0	-2
1	0.048126	-3	-5	-5	-5	-3	-5	-5	-6	-5	7	0	-5	-1	-2	-5	-4	-3	1	-3	4	0	0	1	1	0	0.393	0.816	2.131	-1.239	-0.547	0.049388	-2	3	5	5	-5	-1	-1	-3	1	-5	-5	-2	-4	-5	-2	0	-1
1	0.031252	6	-3	-3	-4	-2	-3	-3	-2	-4	-2	-3	-3	-2	-4	-3	0	-2	-5	-4	-1	0	0	1	1	0	0.67	-2.647	-4.76	-0.228	1.399	0.02063	-3	-4	0	-2	-5	-3	-3	-4	-4	-5	-5	-2	-4	-6	8	-1	-2
1	0.09566	-3	-2	7	-1	-5	-1	-2	-3	0	-2	-5	1	-4	-1	-4	-2	-2	-3	0	-2	0	0	1	0	1	-0.277	1.648	0.533	1.831	-0.561	0.092713	-1	-3	-1	-2	-3	-2	-3	-4	-4	-1	-3	-3	-2	-4	-3	1	6
1	0.018728	-2	-4	-2	-3	-5	-4	-4	7	-4	-6	-6	-4	-5	-5	-4	-2	-4	-5	-5	-5	0	0	1	0	1	1.045	2.064	1.33	-0.384	1.652	0.023694	3	-3	-3	-4	4	-3	-4	5	-4	-4	-4	-3	-4	-5	-3	-1	0
1	0.30609	-4	-4	-1	8	-6	-2	0	-3	-3	-5	-6	-3	-5	-6	-3	-2	-3	-6	-5	-5	0	0	1	1	0	-0.259	-3.242	-3.656	1.05	0.302	0.33524	-3	0	-1	-3	-3	-1	-2	-4	9	-4	-5	4	-3	-4	-3	-1	0
1	0.29246	3	-2	-1	-2	-1	-1	-2	-1	-2	-1	-2	-1	0	-3	-2	3	3	-4	-2	0	0	0	1	1	0	1.57	-0.146	-0.733	-0.591	-1.302	0.245	0	-2	1	-1	-2	-1	-1	-2	-2	-2	-2	-1	0	-3	-1	4	4
1	0.17501	-1	-3	-1	-2	-3	-3	-3	7	-3	-5	-5	-2	-4	-4	-3	-1	-2	-3	-4	-4	0	1	0	1	0	1.045	2.064	1.33	-0.384	1.652	0.13358	-1	-3	-4	-4	-2	-3	-4	-4	-4	3	3	-3	1	-1	-3	-3	-1
1	0.067061	-1	2	-2	-1	-3	2	4	-3	-1	-3	-4	1	-2	-1	-3	1	2	-5	-2	-3	0	1	0	1	0	0.908	1.313	2.213	-0.032	0.326	0.045489	-3	-5	-5	-6	-3	-5	-3	-5	-5	4	2	-5	5	0	-5	-4	-2
1	0.52362	-2	-4	-3	-3	-4	-3	-3	-4	-4	-5	-5	-3	-5	-4	8	1	-2	-6	-4	-5	0	0	1	0	1	0.421	-1.392	-1.628	0.189	2.081	0.50327	-1	-3	-2	4	-3	0	3	-2	0	-3	-4	1	-1	-5	4	0	-2
1	0.54584	-3	0	2	0	-4	-3	0	-4	-1	-1	0	-1	-1	5	-2	-1	2	-3	0	0	0	0	1	0	1	-0.397	0.412	1.891	-1.006	-0.59	0.53534	-1	-2	2	1	1	3	2	-2	-1	-2	-3	1	0	-4	-3	0	3
1	0.46651	-2	-3	-3	-3	-4	0	-2	-4	-2	-4	-4	-2	-4	-2	8	-1	-3	-5	-4	-1	0	0	1	0	1	0.421	-1.392	-1.628	0.189	2.081	0.44945	-3	-1	5	3	-4	-1	2	-2	2	-1	-1	2	-3	-4	-3	-2	0
1	0.3982	0	-4	-4	-4	3	-3	-4	-4	-4	3	2	-1	-1	-3	1	-2	-1	-4	-3	3	0	1	0	1	0	1.242	-1.262	-0.544	-1.337	-0.279	0.42008	-1	2	-2	-2	-3	3	0	-2	-2	-2	-2	2	3	-3	-2	1	2
1	0.82279	-1	-3	0	4	-5	-2	5	-4	2	-1	-4	-2	-4	-5	-1	-2	2	-5	-4	1	0	1	0	0	1	0.113	-0.837	1.477	1.357	-1.453	0.82547	-3	-1	2	1	-5	1	4	0	-3	-4	-4	2	-4	-3	-2	1	-1
1	0.19348	0	0	3	2	-4	1	-2	1	-3	-4	-1	-1	0	-4	-3	2	0	-4	0	-3	0	1	0	1	0	-0.259	-3.242	-3.656	1.05	0.302	0.1579	0	-4	-4	-5	-3	-4	-4	-4	-4	2	-1	-4	-1	-3	-4	-3	-2
1	0.31066	-2	-4	0	7	-6	-2	1	-3	-2	-5	-6	-3	-5	-5	-4	0	-2	-6	-1	-3	0	0	1	0	1	-0.259	-3.242	-3.656	1.05	0.302	0.3157	-1	-5	-3	-5	10	-5	-5	-5	-5	-2	-2	-5	-3	-3	-4	-1	2
1	0.078062	-2	1	1	4	-5	3	3	-4	3	-5	-5	3	-4	-5	-4	-2	-2	-5	-3	-4	1	0	0	0	1	-0.259	-3.242	-3.656	1.05	0.302	0.092996	5	-3	-3	-2	0	-2	1	-2	-1	-2	-3	-1	-2	-1	-3	0	0
1	0.032745	-2	-3	-2	-3	-3	-3	-3	-3	-4	-3	-4	-2	-3	-5	-4	4	6	-5	-4	0	0	1	0	1	0	0.908	1.313	2.213	-0.032	0.326	0.029013	-3	-5	-5	-6	-4	-5	-6	-6	-6	7	1	-5	-1	-3	-5	-5	-3
1	0.079122	-4	-5	-6	-6	-4	-5	-6	-6	-6	7	0	-5	1	-3	-5	-5	-3	-5	-3	1	1	0	0	1	0	0.393	0.816	2.131	-1.239	-0.547	0.064828	-2	5	-2	-1	-5	1	0	-4	-3	-1	-3	2	-3	-5	-3	-3	-1
1	0.39458	-4	-5	-6	-6	-3	-5	-5	-6	-5	1	6	-5	1	-1	-5	-4	-3	-4	-3	-1	1	0	0	1	0	1.266	-0.912	-1.505	-1.019	-0.987	0.42345	-2	-3	1	0	-4	-3	-1	6	-2	-6	-6	0	-4	-6	-3	-1	-3
1	0.11822	-4	-5	-6	-6	-4	-5	-5	-6	-5	5	4	-5	4	0	-5	-5	-2	-4	-3	1	1	0	0	1	0	0.393	0.816	2.131	-1.239	-0.547	0.11888	1	0	-3	-3	-4	4	2	-2	-2	1	1	-2	-1	1	-2	-2	-1
1	0.48112	-2	-1	-5	-5	-4	-4	-3	-5	1	1	5	-2	0	0	-2	-2	-3	4	-3	-1	1	0	0	1	0	1.266	-0.912	-1.505	-1.019	-0.987	0.43839	0	1	-1	-1	-4	1	2	-3	0	-3	-3	4	1	-3	0	1	-1
1	0.27942	0	-4	-4	-5	-3	-3	-3	-2	-3	4	2	-3	-2	-2	-1	-3	-3	-5	-2	4	0	0	1	1	0	1.242	-1.262	-0.544	-1.337	-0.279	0.22844	-2	-1	0	6	-3	-1	0	0	-2	-4	-3	-1	-4	-4	-3	1	2
1	0.69051	0	-5	-2	-5	11	-4	-5	-4	-4	-4	-4	-4	-4	-4	-2	-2	-3	-4	-4	-3	0	0	1	1	0	-1.02	-0.255	-0.862	-1.343	0.465	0.66713	0	0	-1	2	-4	2	0	0	-1	0	0	-2	-3	-2	-3	3	0
1	0.14028	-1	-1	-2	-1	-5	-2	1	1	-1	-6	-6	-2	-5	-6	7	0	-3	-6	-4	-5	0	0	1	0	1	0.421	-1.392	-1.628	0.189	2.081	0.14444	-2	-5	-6	-6	-4	-5	-5	-6	-6	3	-2	-5	-1	-4	-4	-5	-3
1	0.033843	-2	-5	-3	-4	-5	-4	-4	7	-4	-6	-6	-4	-5	-5	-4	-1	-4	-5	-5	-5	0	0	1	1	0	1.045	2.064	1.33	-0.384	1.652	0.030982	-4	-3	8	-1	-5	-2	-3	-3	-2	-6	-6	-2	-4	-5	-4	-2	-2
1	0.1871	-2	0	1	-4	-2	-1	-3	-4	6	-3	-4	1	-1	3	-3	1	-1	0	5	-4	0	1	0	1	0	-0.277	1.648	0.533	1.831	-0.561	0.13906	-2	3	-1	-4	-5	6	-1	-3	1	-1	0	1	1	-5	-4	-3	-1
1	0.25015	-1	3	0	1	4	0	1	-3	0	-2	-1	1	0	-1	-5	1	1	-5	-2	-1	0	1	0	0	1	0.44	2.897	1.502	1.538	-0.055	0.19637	-1	-5	-5	-5	-4	-2	-3	-4	-2	1	0	-5	0	-2	-2	-2	-1
1	0.11961	-3	0	3	3	-5	1	2	-4	2	-5	-5	2	-4	-4	0	1	-1	0	0	-4	0	0	1	0	1	-0.259	-3.242	-3.656	1.05	0.302	0.1043	-3	-5	-5	-6	-2	-2	-5	-6	-5	4	-1	-5	-1	2	-3	-4	-2
1	0.046592	1	-3	2	0	-4	-1	1	5	-1	-5	-5	-2	-3	-4	-4	0	-2	-5	-1	-4	1	0	0	0	1	1.045	2.064	1.33	-0.384	1.652	0.045378	3	-3	-2	-3	-2	-3	-2	1	1	-3	-3	-3	-3	-1	-3	-1	5
1	0.40314	-4	-4	-5	-2	2	0	-4	-5	-4	2	5	-4	0	1	-5	-3	-3	-4	-1	-1	0	1	0	1	0	1.266	-0.912	-1.505	-1.019	-0.987	0.33868	-3	-4	-2	-1	-3	-4	-1	-5	-5	3	1	-4	-1	-3	-3	-4	-2
1	0.96406	-1	0	1	0	-1	2	0	0	3	-3	-2	1	-4	0	1	1	1	-5	-1	-3	0	0	1	0	1	-0.503	-1.853	-3.005	0.931	-0.179	0.96517	0	-1	1	-1	0	0	0	-1	6	-1	-2	-2	1	0	-2	0	1
1	0.23874	-3	-4	-5	-5	1	-4	-5	-5	-4	2	5	-4	-1	3	-4	-4	-1	-3	-2	1	1	0	0	1	0	1.266	-0.912	-1.505	-1.019	-0.987	0.21837	-3	0	-4	-4	-3	-3	-4	-4	-4	3	4	0	2	-2	-4	-3	1
1	0	0	0	0	0	0	0	0	0	0	0	0	0	0	0	0	0	0	0	0	0	0	0	0	0	0	0	0	0	0	0	0.67855	-2	-3	-4	-5	-3	-2	-4	-4	-3	0	1	-3	9	-1	-4	-3	-2
1	0.43944	-2	2	0	4	-5	2	3	-4	-3	-3	-1	2	-2	-5	-4	-1	-2	-5	-4	-3	1	0	0	0	1	-0.259	-3.242	-3.656	1.05	0.302	0.44265	-3	-2	1	5	-6	0	4	1	-3	-6	-6	0	-5	-6	-4	0	-3
1	0.43723	-1	1	-1	1	-4	1	3	1	-3	-3	-4	4	-1	-4	-3	0	0	-4	-4	-4	1	0	0	0	1	0.113	-0.837	1.477	1.357	-1.453	0.43147	-2	-4	-4	-5	11	-4	-5	-4	-4	-3	-3	-4	-3	-4	-4	-3	-3
1	0.55383	-2	-6	-5	-6	11	-5	-6	-5	-5	-3	-3	-5	-3	-5	-5	-3	-3	-5	-5	0	0	0	1	1	0	-1.02	-0.255	-0.862	-1.343	0.465	0.61456	1	-2	0	-2	-3	2	-1	-1	2	-1	0	1	1	-2	1	1	1
1	0.12434	-3	-4	-4	-5	-4	-4	-5	-5	-5	2	4	-4	3	0	-5	-1	2	-4	-3	2	1	0	0	1	0	1.266	-0.912	-1.505	-1.019	-0.987	0.12215	2	-5	-5	-5	-3	-4	-5	-5	-5	6	-1	-4	1	-3	-5	-3	-1
1	0.1383	-1	-1	-2	-4	0	-3	-1	-4	0	2	3	-2	0	-2	-3	-2	0	1	-3	2	1	0	0	1	0	1.266	-0.912	-1.505	-1.019	-0.987	0.14114	5	-4	-4	-2	3	-3	-2	1	-1	-3	-4	-4	-1	-3	-3	-1	-1
1	0.8927	-2	6	-1	-2	-4	1	0	-3	0	-3	-2	2	-2	-3	-2	-1	-1	-3	-2	-3	1	0	0	0	1	0.44	2.897	1.502	1.538	-0.055	0.88946	-2	-2	-2	-3	-3	-2	-2	-3	2	-2	-1	-2	-1	3	-3	-2	-2
1	0.088042	-2	6	-1	-2	-4	0	-1	-3	-1	-4	-3	3	-2	-4	-3	0	-1	-4	-3	-3	0	1	0	0	1	0.44	2.897	1.502	1.538	-0.055	0.07086	-2	0	-1	-1	-4	7	2	-3	0	-4	-3	1	-1	-4	-2	-1	-1
1	0.14058	-2	-4	-4	-4	-2	-4	-4	-5	-4	6	1	-4	1	-1	-4	-3	-1	-3	-2	2	0	1	0	1	0	0.393	0.816	2.131	-1.239	-0.547	0.14561	0	-3	-1	-2	-3	-3	-3	7	-3	-5	-5	-2	-4	-4	-3	-1	-2
1	0.6084	-2	0	2	0	-4	1	1	-1	-2	-4	-4	5	0	-4	-3	1	0	-4	-3	-3	0	0	1	1	0	-0.277	1.648	0.533	1.831	-0.561	0.62609	-1	-3	-3	0	-4	0	-1	0	3	0	-1	-3	2	-4	4	1	0
1	0.33722	-1	-1	-1	-2	0	0	-2	-3	-1	2	3	-1	1	-1	-4	0	0	-4	2	1	1	0	0	1	0	1.242	-1.262	-0.544	-1.337	-0.279	0.35751	1	2	-1	-2	-1	0	1	-2	4	-2	-2	4	-1	-1	-4	-2	-1
1	0.16954	-4	-5	-6	-3	-4	-5	-5	-6	-6	4	5	-5	1	-2	0	-5	-4	-5	-2	1	1	0	0	1	0	1.266	-0.912	-1.505	-1.019	-0.987	0.17147	-2	-5	-5	-6	-2	-5	-5	-2	2	3	1	-5	2	7	0	-5	-4
1	0.075033	-3	-4	-5	-5	-4	-4	-5	-5	-4	-1	4	-4	0	7	-4	-4	-3	-2	0	-2	0	0	1	1	0	-0.397	0.412	1.891	-1.006	-0.59	0.094511	-2	-4	-3	-1	-5	-3	-2	-4	-3	-5	-5	-3	-5	-6	8	-2	-3
1	0.55202	-1	2	-1	-2	-3	-2	-1	-3	1	-4	-4	1	-4	-3	5	3	-1	-5	-3	-4	0	0	1	0	1	0.67	-2.647	-4.76	-0.228	1.399	0.58876	-2	2	0	-2	-5	2	2	-5	-2	-3	-3	2	-1	3	1	-1	-3
1	0.060355	2	-3	-2	-3	1	-3	-2	-3	-1	0	3	-4	2	0	-1	-1	-1	-1	0	1	1	0	0	1	0	-1.005	1.212	2.219	-0.663	-1.524	0.07024	-2	6	1	-1	-2	-1	0	-3	1	-2	-1	0	-2	-2	-4	-1	-2
1	0.034559	1	-2	-3	-3	-2	3	1	-3	-4	0	0	-2	7	-1	-5	-1	-1	-5	0	0	1	0	0	1	0	-1.005	1.212	2.219	-0.663	-1.524	0.036429	-1	-5	-4	-6	0	-5	-5	-6	-3	3	3	-5	4	0	-4	-4	-2
1	0.15979	-1	-3	-2	4	-4	2	5	-2	-3	-5	-4	-1	2	-5	-4	-1	0	-6	-3	-4	1	0	0	0	1	1.242	-1.262	-0.544	-1.337	-0.279	0.22374	-2	-2	-4	0	-5	0	-1	-2	-1	-4	-3	-3	1	2	-5	-3	-3
1	0.1496	5	-5	-4	-5	-2	-3	-4	-1	-3	1	1	-4	0	-3	-4	-2	-1	-5	-4	2	1	0	0	1	0	1.242	-1.262	-0.544	-1.337	-0.279	0.10966	3	2	1	0	-2	-1	1	3	0	-4	-4	0	-3	-5	-4	1	-2
1	0.27015	1	0	-1	1	-1	0	2	2	-2	-5	-4	3	-4	-5	0	0	1	-5	-5	-4	1	0	0	0	1	-0.259	-3.242	-3.656	1.05	0.302	0.29451	-2	-2	-3	2	-6	0	7	-3	-3	-6	-5	-1	-5	-6	-4	0	-1
1	0.33467	-4	-4	-4	-6	-5	-4	-5	-6	0	-4	-3	-4	-3	1	-5	-3	-4	0	10	-4	0	0	1	0	1	-0.838	1.512	3.097	0.26	0.83	0.28213	0	-4	-4	-5	-4	-2	-5	-5	-5	1	5	-4	0	-3	-2	-2	1
1	0.048247	1	3	1	-1	0	2	1	-1	3	-3	-4	3	-3	-5	-3	0	-1	-5	-3	-1	0	1	0	0	1	-0.503	-1.853	-3.005	0.931	-0.179	0.047133	-1	-1	-1	-1	-4	1	2	-1	0	-3	-4	1	-2	-2	0	1	4
1	0.023901	-1	2	4	-3	-2	-3	-4	6	-3	-6	-6	-3	-5	-5	-4	0	-3	-5	-5	-5	1	0	0	1	0	1.045	2.064	1.33	-0.384	1.652	0.019834	-3	-2	-3	0	-6	2	7	-4	0	-6	-5	-2	-4	-6	-4	-3	-3
1	0.56929	3	0	-1	4	0	-1	1	-4	-4	-1	-2	-3	0	-5	-4	1	0	-5	-4	-1	0	0	1	1	0	1.57	-0.146	-0.733	-0.591	-1.302	0.58826	0	-4	-1	-4	0	-4	-2	-4	-3	-3	-2	-2	0	5	4	-2	-2
1	0.045719	-2	-5	-6	-6	-4	-5	-6	-5	-6	5	4	-5	0	0	-6	-5	-3	-5	-4	2	1	0	0	1	0	0.393	0.816	2.131	-1.239	-0.547	0.047075	-2	5	-1	-4	3	1	-1	-5	0	2	-2	2	-2	-4	-3	-2	0
1	0.24469	-3	-4	-5	-6	-4	-4	-4	-6	-5	1	4	-4	8	-2	-5	-4	-3	2	-3	0	1	0	0	1	0	1.266	-0.912	-1.505	-1.019	-0.987	0.23478	-3	-2	-6	-5	-4	-4	-4	-6	-4	6	3	-4	5	0	-5	-5	-3
1	0.043682	-4	-5	-5	-6	3	-5	-5	-5	-1	-1	-1	-5	-2	7	-6	-4	-4	-1	6	-3	0	0	1	0	1	-0.397	0.412	1.891	-1.006	-0.59	0.042003	-3	-5	-5	-5	1	-5	-5	-6	-5	4	1	-5	-1	-3	-5	-4	-1
1	0.21435	-1	-2	0	4	-2	3	4	-2	1	-5	-5	0	-4	-5	-3	1	0	-5	-4	-4	0	0	1	0	1	-0.259	-3.242	-3.656	1.05	0.302	0.23138	-2	-2	-1	2	-5	-2	-3	6	-4	-6	-6	-2	-5	-5	-4	-2	-3
1	0.033077	-4	-4	-5	-6	-1	-4	-5	-6	-4	0	6	-5	2	-1	-5	-5	-3	-4	-2	-1	1	0	0	1	0	1.266	-0.912	-1.505	-1.019	-0.987	0.029086	-3	-5	-5	-6	-3	-5	-5	-6	-5	6	4	-5	2	-1	-5	-4	-3
1	0.62958	-1	-1	-1	2	-5	4	4	-4	-3	-2	-2	1	-4	-5	-1	0	0	-5	-4	-2	1	0	0	0	1	-0.503	-1.853	-3.005	0.931	-0.179	0.61014	-1	-3	1	-2	1	-2	-3	-2	-2	3	4	-4	1	0	-4	-2	-3
1	0.11554	-3	-4	-5	-6	-2	-3	-5	-5	-4	0	1	-4	10	-2	-5	-4	-3	-4	-4	1	0	1	0	1	0	1.266	-0.912	-1.505	-1.019	-0.987	0.11424	-4	3	6	-3	-4	-2	-2	-4	-2	-2	-2	1	4	-1	-5	-3	-2
1	0.3914	1	-3	-1	-3	2	-2	0	-1	-1	0	3	-2	3	0	-5	-2	-2	-2	-1	-1	1	0	0	1	0	1.266	-0.912	-1.505	-1.019	-0.987	0.40535	-2	-1	1	1	-2	2	3	0	1	-4	-2	1	-3	-3	-3	2	-1
1	0.15825	-2	-3	3	5	-2	-1	-1	-3	3	-2	0	-3	-2	-1	-1	-1	-1	-5	0	-2	0	0	1	1	0	-0.169	0.933	1.299	0.945	0.828	0.10768	-1	-4	-4	-4	-3	-4	-4	-4	-1	2	-1	-1	0	-2	-4	-1	1
1	0.040721	-2	-4	-1	-5	-3	-4	-4	-5	-4	4	2	-4	0	-1	-4	-4	-1	-4	-3	5	0	1	0	1	0	1.242	-1.262	-0.544	-1.337	-0.279	0.026351	-1	-1	0	0	-4	-1	4	-4	0	-1	1	2	3	0	-4	-2	-2
1	0.045172	-2	-3	3	0	-3	-1	-3	-3	3	1	1	-4	-2	2	-1	-2	0	-4	3	0	0	1	0	1	0	-0.838	1.512	3.097	0.26	0.83	0.038387	1	-5	-3	-5	-1	-4	-5	-4	-3	1	2	-5	-1	-3	-5	-2	1
1	0.024907	0	-5	-6	-6	-4	-5	-5	-6	-6	3	1	-5	-1	-3	-5	-3	-2	-5	-4	6	0	1	0	1	0	1.242	-1.262	-0.544	-1.337	-0.279	0.018529	-3	-3	2	-1	-5	-1	4	-5	-1	0	2	1	3	2	-5	-3	-2
1	0.40928	-1	-2	1	6	-4	-2	2	-1	-1	-3	-4	0	-3	-4	-3	-1	-1	-4	-2	-2	0	1	0	0	1	-0.259	-3.242	-3.656	1.05	0.302	0.45892	-2	-3	-3	-3	-3	-3	-3	2	-2	-1	-2	-2	-2	7	-4	-3	-1
1	0.047407	-3	-5	-6	-5	-3	-5	-5	-6	-6	8	0	-5	-1	-2	-5	-5	-3	-5	-3	1	1	0	0	1	0	0.393	0.816	2.131	-1.239	-0.547	0.046929	-2	-5	-3	-3	-5	-4	-4	7	-4	-6	-6	-4	-5	-5	-4	-2	-4
1	0.84662	2	-2	-2	0	-3	-2	-2	-2	-3	-3	-3	1	-3	1	5	2	-2	-3	-2	-3	0	0	1	0	1	0.421	-1.392	-1.628	0.189	2.081	0.83523	-2	0	-2	-2	-4	-1	1	-3	-2	-3	-3	6	-3	-4	-2	2	-2
1	0.29037	-1	2	1	0	-4	1	-1	-3	-2	-3	-3	5	-3	-4	-2	0	0	-4	-3	-3	1	0	0	0	1	-0.277	1.648	0.533	1.831	-0.561	0.26053	0	-1	-1	-3	-2	-1	-3	-3	-2	1	0	-2	0	-2	-3	0	1
1	0.39859	-1	-4	0	2	-4	-2	2	5	-4	-5	-5	-2	-3	-5	1	-1	-2	-5	-5	-4	0	0	1	0	1	1.045	2.064	1.33	-0.384	1.652	0.37415	-2	-3	0	5	-5	-1	3	0	-3	-4	-5	0	-4	-5	-3	-1	0
1	0.22019	-2	3	-3	-3	-3	1	-1	-5	-3	2	-2	2	-1	-4	-4	-2	1	-5	-4	4	0	1	0	0	1	1.242	-1.262	-0.544	-1.337	-0.279	0.19692	-3	-5	-6	-5	-1	-5	-5	-6	-6	4	3	-5	0	-1	-4	-4	-2
1	0.19692	-3	-5	-6	-5	-1	-5	-5	-6	-6	4	3	-5	0	-1	-4	-4	-2	-5	-4	5	0	1	0	1	0	1.242	-1.262	-0.544	-1.337	-0.279	0.17403	-1	-3	-1	-3	-3	-3	-2	-1	-3	-4	-5	-3	-4	-5	-3	6	3
1	0.058408	-4	-4	-1	8	-6	-2	0	-3	-3	-5	-6	-3	-5	-6	-4	-2	-3	-7	-5	-5	0	0	1	1	0	-0.259	-3.242	-3.656	1.05	0.302	0.074742	-4	8	-3	-4	-6	-1	-2	-5	-2	-5	-4	0	-4	-5	-4	-3	-3
1	0.22537	2	-4	-3	-3	-1	-4	-4	5	-1	-3	-5	-4	-3	-2	-3	1	0	-5	0	-1	0	1	0	0	1	1.045	2.064	1.33	-0.384	1.652	0.1965	-1	-2	1	-3	2	-3	-3	-4	4	-3	-3	0	-2	5	-5	-2	-2
1	0.62773	-3	-5	-5	-4	-4	-5	-5	-4	-5	6	3	-5	2	-3	-5	-3	-2	-5	-4	3	1	0	0	1	0	1.266	-0.912	-1.505	-1.019	-0.987	0.60749	-2	0	-1	-2	-5	8	-1	-2	-1	-5	-5	1	-2	-5	-4	0	-1
1	0.21361	-2	-1	-5	-5	-4	-3	-2	-6	-1	-2	-1	-4	-1	7	-6	-4	-1	-2	6	-1	1	0	0	1	0	-0.397	0.412	1.891	-1.006	-0.59	0.20433	2	1	1	0	-4	4	4	-3	0	-3	-3	0	-3	-5	-4	-1	-1
1	0.074438	-3	-2	2	1	-6	-3	4	-5	0	-4	-2	-1	0	5	-5	-4	-4	-3	4	-1	1	0	0	1	0	-0.397	0.412	1.891	-1.006	-0.59	0.076162	0	-5	-2	1	-5	-2	-2	4	-1	1	-2	-4	-1	1	-5	-2	0
1	0.072459	-4	-5	-6	-6	-4	-5	-5	-6	-6	6	1	-5	-1	0	-5	-3	-3	-5	-4	5	0	1	0	1	0	1.266	-0.912	-1.505	-1.019	-0.987	0.076567	-3	-3	7	4	-1	-2	0	-3	-1	-3	-6	-2	-5	-5	-5	-1	-1
1	0.15084	-2	1	2	2	-2	0	0	1	1	-2	-2	0	-1	-2	-3	1	1	-3	-1	-3	0	1	0	0	1	-0.169	0.933	1.299	0.945	0.828	0.17252	1	0	-1	1	2	-1	3	-1	2	-2	-2	-1	0	0	-2	0	-2
1	0.068013	-4	2	-2	-5	-2	-2	-2	-5	5	-2	-2	-1	-1	5	-5	-3	-2	9	3	-4	0	1	0	0	1	-2.128	-0.184	0.672	-0.595	0.009	0.048531	-3	-1	5	4	1	-2	-2	-3	5	-5	-4	-1	-4	-5	-4	2	-1
1	0.62572	0	1	-1	-1	-3	0	0	-2	-2	-1	-1	4	-2	-3	-3	0	1	0	-3	-1	1	0	0	0	1	-0.277	1.648	0.533	1.831	-0.561	0.62443	1	-1	-1	0	-3	1	0	-2	-1	-2	-2	1	-2	-1	-1	3	0
1	0.043966	-2	-5	-5	-3	-4	-5	-3	-6	-6	5	0	-5	-2	-3	-5	-4	-1	-5	-2	5	0	1	0	1	0	1.242	-1.262	-0.544	-1.337	-0.279	0.039016	0	-5	0	-4	-5	-4	-5	7	-5	-6	-6	-3	-5	-6	-5	-2	-4
1	0.16112	-2	-3	0	-3	-2	-2	-3	-3	-3	-2	-2	-2	-2	-4	-3	0	7	-4	-3	-2	0	0	1	1	0	0.908	1.313	2.213	-0.032	0.326	0.17603	-2	3	-1	-3	-5	1	0	-3	4	-4	-3	6	-3	-4	-2	-1	-1
1	0	0	0	0	0	0	0	0	0	0	0	0	0	0	0	0	0	0	0	0	0	0	0	0	0	0	0	0	0	0	0	0	0	0	0	0	0	0	0	0	0	0	0	0	0	0	0	0	0
1	0.21033	-2	-2	3	4	-6	2	4	-4	-2	-3	-5	3	-2	-5	-3	-2	0	-6	-5	-3	0	0	1	0	1	-0.277	1.648	0.533	1.831	-0.561	0.16536	-3	-4	-4	-5	-5	-4	-5	-6	-1	-3	-2	-4	-1	1	-6	-2	-3
1	0.21911	-2	-3	-1	-3	-1	-3	-3	-4	-4	-3	-4	-3	-3	-4	-3	1	7	-5	-4	-2	0	1	0	0	1	0.908	1.313	2.213	-0.032	0.326	0.20626	0	-1	-2	-3	-1	-2	-3	-3	-2	2	1	1	2	-2	-3	-2	1
1	0.67915	1	-3	0	4	-1	-2	-1	-2	5	-5	-5	-1	-4	-2	-1	4	-1	-5	-3	-4	0	0	1	0	1	0.67	-2.647	-4.76	-0.228	1.399	0.66339	1	0	-1	1	-3	0	2	-1	-2	-5	-4	4	-3	-4	2	1	-1
1	0.95703	0	1	2	-1	-3	0	0	-2	-1	-1	-2	4	-2	-2	-3	0	1	0	0	0	0	0	1	0	1	1.57	-0.146	-0.733	-0.591	-1.302	0.95325	-1	3	0	-2	-2	0	-1	-2	-2	-3	-3	6	-3	-4	-3	-1	-1
1	0.92266	-2	-1	0	-1	-3	-1	0	-3	1	-3	-2	5	-1	-3	0	-1	2	-4	-3	-3	0	0	1	0	1	-0.277	1.648	0.533	1.831	-0.561	0.92352	-1	1	0	0	-2	-1	-1	3	-2	-2	-2	-1	-2	-2	1	2	0
1	0.46529	2	2	-1	1	-3	2	-2	-2	1	-3	0	0	4	-3	-2	-1	-2	0	-2	-2	0	0	1	0	1	0.44	2.897	1.502	1.538	-0.055	0.41323	0	-3	-3	-1	-4	-2	2	-2	-4	-2	-3	-3	-4	-5	7	0	-1
1	0.12532	3	-1	-1	-1	-3	-1	-1	-2	-2	3	-1	-1	0	2	-3	-1	-2	-3	0	-1	1	0	0	1	0	-0.397	0.412	1.891	-1.006	-0.59	0.12644	-1	0	1	0	-5	1	0	-1	2	0	-1	0	2	1	0	0	0
1	0.070178	4	-3	-4	-4	-3	-2	-4	-4	-1	0	2	-2	3	0	-1	-2	-2	1	2	0	1	0	0	1	0	1.57	-0.146	-0.733	-0.591	-1.302	0.053263	3	-2	-1	2	-4	-1	0	0	-3	-5	-4	0	-3	-3	1	2	0
1	0.46475	-1	0	-2	-3	-3	-3	-3	0	-2	0	0	-1	0	5	-3	1	1	3	0	-1	0	0	1	1	0	-0.397	0.412	1.891	-1.006	-0.59	0.43975	-3	-2	-2	-5	-4	-4	-4	-4	-2	1	2	-4	3	6	-3	-1	-2
1	0	0	0	0	0	0	0	0	0	0	0	0	0	0	0	0	0	0	0	0	0	0	0	0	0	0	0	0	0	0	0	0.91546	-3	-4	-4	-5	-3	-3	-4	-5	-4	-1	3	-4	9	-2	-5	-4	-3
1	0.20771	-1	0	-2	1	-2	2	6	-4	0	-4	-1	-1	1	-4	-3	-1	-1	-5	-1	-3	0	0	1	1	0	0.113	-0.837	1.477	1.357	-1.453	0.1936	-2	3	1	1	-6	1	0	-3	-2	-5	-5	0	-4	-5	5	1	0
1	0.17907	-2	-1	-1	-2	-5	8	1	-3	1	-4	-4	0	-2	-5	-3	-1	-2	-4	-3	-4	0	0	1	1	0	-0.503	-1.853	-3.005	0.931	-0.179	0.13999	5	-3	-2	-3	0	-2	-2	-2	-3	-3	-3	-2	-3	-4	-2	4	-1
1	0.066741	-4	8	-3	-4	-4	-1	-3	-4	-2	-5	-5	1	-4	-5	-5	-3	-3	-5	-4	-3	0	0	1	1	0	0.44	2.897	1.502	1.538	-0.055	0.061491	-1	-2	5	-1	-5	2	-1	-3	-1	-5	-5	0	-4	-5	5	-1	-1
1	0.26727	0	0	0	0	-5	4	2	3	-1	-4	-3	2	-3	-4	-3	0	-2	-4	-1	-4	1	0	0	0	1	0.113	-0.837	1.477	1.357	-1.453	0.21409	-1	2	2	-1	-1	1	0	-2	0	-4	-3	3	-1	-4	-1	3	0
1	0.10546	-2	-4	-5	-6	-3	-5	-5	-6	-5	5	2	-4	-1	-2	-5	-4	-2	-5	-1	5	1	0	0	1	0	0.393	0.816	2.131	-1.239	-0.547	0.085256	3	2	0	1	-4	0	3	-2	-1	-4	-2	2	-3	-5	-4	0	-2
1	0.024796	3	-5	-5	-5	7	-4	-4	-4	-4	2	0	-4	-2	-1	-4	-2	0	-4	1	-1	1	0	0	1	0	-1.02	-0.255	-0.862	-1.343	0.465	0.027267	2	3	-2	0	0	1	3	-1	-2	-4	-2	3	-3	-3	-4	-1	-2
1	0.36518	-2	2	-1	-2	-5	3	2	-3	-2	-5	-3	5	-2	-5	-4	0	-1	-5	-3	-4	1	0	0	0	1	-0.277	1.648	0.533	1.831	-0.561	0.38587	0	-1	1	-3	1	1	-1	-2	5	-2	1	1	0	2	-4	0	-3
1	0.067077	1	-4	-4	-5	1	-4	-4	-4	-5	3	1	-4	1	-3	-4	-1	-1	-5	-3	5	1	0	0	1	0	1.242	-1.262	-0.544	-1.337	-0.279	0.066035	3	-3	-3	-3	0	-3	-3	2	-4	-3	-2	0	1	-4	-1	2	2
1	0.099088	1	0	1	-3	0	-2	-3	1	-4	1	-1	-1	-1	-2	-4	-2	3	-1	-4	2	1	0	0	1	0	0.908	1.313	2.213	-0.032	0.326	0.073929	0	-4	-2	-5	-1	-3	-4	-2	-2	3	2	-4	0	1	-5	-3	1
1	0.068113	2	-5	-5	-5	-3	-4	-5	-4	-5	2	0	-4	1	-1	-5	-3	-2	-3	-4	6	0	1	0	1	0	1.242	-1.262	-0.544	-1.337	-0.279	0.059601	-1	-1	-2	-2	-3	-1	-1	-4	-2	2	0	3	0	-2	-4	-2	1
1	0.15827	-1	-4	-4	-5	1	-4	-4	-4	-5	2	-2	-4	-2	-3	-4	-3	1	-5	-3	6	0	0	1	1	0	1.242	-1.262	-0.544	-1.337	-0.279	0.19774	-4	-4	1	8	-5	-2	1	-3	0	-5	-5	-3	-5	-5	-4	-2	-3
1	0.28367	-1	0	-1	0	-4	4	2	-1	-2	-4	-3	2	0	-5	4	1	-2	-5	-4	-4	1	0	0	0	1	-0.503	-1.853	-3.005	0.931	-0.179	0.31818	-2	-2	0	5	-5	0	5	-1	-2	-5	-4	-1	-4	-5	-1	0	-1
1	0.067193	-3	-1	-1	-4	-3	-1	-3	-4	1	-1	0	-1	0	4	-4	0	0	3	6	-1	0	1	0	1	0	-0.397	0.412	1.891	-1.006	-0.59	0.085495	-1	-4	-4	-4	1	-4	-4	-1	-3	1	1	-4	2	6	-4	-3	-3
1	0.21351	0	4	-3	-3	-4	3	-2	-3	-3	-2	-3	3	-1	-4	-2	-1	2	-5	-2	-3	1	0	0	0	1	0.908	1.313	2.213	-0.032	0.326	0.19652	1	3	1	-1	-4	-2	-2	-4	2	-4	-4	4	-3	0	-4	-1	2
1	0.077465	-3	-3	-4	-5	-4	-3	-4	-5	0	-3	-3	-3	-3	2	-5	-3	-3	1	9	-3	0	0	1	1	0	-0.838	1.512	3.097	0.26	0.83	0.086452	-4	-4	-5	-5	-4	-5	-5	-5	-3	-2	-1	-5	0	8	-5	-4	-4
1	0.2556	-2	-4	-5	-5	-2	-4	-4	-5	-5	2	-1	-4	-1	-2	-4	-3	-2	-5	-3	6	1	0	0	1	0	1.242	-1.262	-0.544	-1.337	-0.279	0.25389	-2	-2	-2	1	-5	2	7	-4	-2	-5	-4	-1	-3	-5	-3	-2	-2
1	0.24319	-2	-4	-5	-5	-2	-4	-4	-5	-5	1	1	-4	-1	-2	-4	-3	-2	-4	-3	6	0	1	0	1	0	1.242	-1.262	-0.544	-1.337	-0.279	0.22478	2	-4	-4	-3	-3	-3	-3	-3	-4	-2	-2	-3	-3	-4	7	-2	-2
1	0.55906	1	-4	-4	-5	-3	-2	-4	-1	-4	3	1	-4	6	-2	-4	-3	-2	-4	-3	3	0	1	0	1	0	-1.005	1.212	2.219	-0.663	-1.524	0.49607	-3	-4	-4	-4	-1	-4	-4	-4	0	-2	-2	-4	0	8	-5	0	1
1	0.12804	-1	-3	-3	-1	-4	3	1	-2	-1	-4	-4	-2	-4	0	7	1	-2	-4	-3	-4	1	0	0	0	1	0.421	-1.392	-1.628	0.189	2.081	0.14325	-4	-4	-5	-6	-4	-4	-5	-5	-3	-1	1	-5	-2	5	-5	-4	-4
1	0.22274	-3	2	-2	6	-6	1	2	-4	-1	-2	-4	-1	-2	-2	-4	-2	-1	-6	-5	-5	1	0	0	0	1	-0.259	-3.242	-3.656	1.05	0.302	0.20528	-4	-1	7	-1	-5	2	-3	-2	2	-5	-3	2	-4	-5	-4	-2	-3
1	0.087377	-2	-6	-2	-6	10	-5	-6	-5	-5	-2	-3	-5	-4	-5	-5	-3	-3	-5	-3	3	1	0	0	1	0	-1.02	-0.255	-0.862	-1.343	0.465	0.082643	-4	-3	-3	-1	-6	-1	7	-5	-3	-6	-3	-2	-5	-6	-4	-3	-4
1	0.623	0	0	0	-1	-2	0	0	-2	-1	0	2	3	0	-2	-1	-1	-1	0	-3	0	0	0	1	0	1	1.266	-0.912	-1.505	-1.019	-0.987	0.60903	-1	-1	-1	-1	-2	-2	-1	-3	-1	0	0	-1	-2	2	4	-1	0
1	0.25105	-1	0	-2	-3	2	-1	0	-2	-1	-1	1	0	2	-1	-1	-1	2	-2	1	1	0	0	1	0	1	-0.838	1.512	3.097	0.26	0.83	0.13428	-2	0	-4	-3	1	-1	-1	-1	3	2	-2	-2	-1	3	-3	-1	-2
1	0.1824	-1	3	-3	-3	-5	2	-1	-4	-3	-1	0	5	0	-4	-3	-2	-1	-5	-3	-3	1	0	0	1	0	0.44	2.897	1.502	1.538	-0.055	0.17214	3	-5	-4	-5	10	-4	-4	-3	-5	-3	-3	-4	-2	-4	-4	-1	-2
1	0.14621	-2	-5	-5	-6	1	-5	-5	-6	-5	1	0	-5	-1	-3	-5	-4	-2	-5	-3	7	1	0	0	1	0	1.242	-1.262	-0.544	-1.337	-0.279	0.12436	6	-4	-2	-4	-1	-3	-3	0	-4	-3	-4	-3	-3	-2	-3	-1	-2
1	0.24605	4	-4	-3	-4	4	-3	-3	1	-4	-3	-4	-3	-3	-5	-3	3	1	-5	-4	-2	1	0	0	1	0	1.57	-0.146	-0.733	-0.591	-1.302	0.21446	0	2	-2	-3	-2	1	0	-3	4	2	-1	-1	2	-2	-4	2	-2
1	0.045764	3	-2	2	-3	1	1	-3	-2	5	-2	0	-2	1	-4	-4	1	-1	-1	0	-2	0	0	1	1	0	-1.474	-0.078	-1.673	0.336	-0.417	0.031701	-3	-5	-6	-6	-3	-5	-5	-5	-5	3	5	-5	2	-1	-5	-4	-3
1	0.47634	1	1	1	1	-5	-4	0	-1	0	0	-4	-1	3	-2	4	-1	0	1	-4	-1	0	0	1	1	0	0.421	-1.392	-1.628	0.189	2.081	0.4475	0	-1	-1	-1	1	1	-1	-2	2	1	0	0	2	0	0	1	0
1	0.18098	0	-2	1	3	-1	1	2	0	0	-3	-4	1	1	-3	-2	3	-2	-2	-2	-3	1	0	0	0	1	0.67	-2.647	-4.76	-0.228	1.399	0.17457	0	-1	1	0	-5	2	1	-1	0	0	0	0	2	-5	-1	1	1
1	0.086943	-2	-1	5	2	-5	0	-2	-2	-1	-2	-3	0	-4	-5	2	1	-2	-5	-1	-1	0	1	0	0	1	-0.169	0.933	1.299	0.945	0.828	0.078981	-1	-4	-4	-5	2	-4	-5	-5	1	1	3	-4	4	1	-5	-1	1
1	0.25525	5	-4	-4	-4	-3	-3	-4	-3	-4	0	1	-3	-2	-3	-4	-2	-2	-5	-3	4	1	0	0	1	0	1.242	-1.262	-0.544	-1.337	-0.279	0.29147	-2	0	0	2	-3	-1	1	-4	-1	1	3	2	0	0	-4	-3	-2
1	0.32186	-3	-4	-5	-5	-3	-4	-5	-5	-5	4	4	-4	4	-1	-5	-4	-1	-3	-3	3	1	0	0	1	0	0.393	0.816	2.131	-1.239	-0.547	0.37367	-3	7	-2	2	-5	2	-1	-4	-2	-4	-4	1	-3	-5	-4	-2	-2
1	0.42682	0	1	-2	-2	-2	-1	-2	-1	-1	-1	2	-1	5	-1	-2	-1	0	-2	-1	0	1	0	0	1	0	1.266	-0.912	-1.505	-1.019	-0.987	0.41456	2	-1	-2	0	4	0	-1	-2	-2	-1	0	0	2	0	-1	0	0
1	0.23165	-1	-1	0	-4	-5	1	-2	-3	2	0	0	0	2	0	-2	0	3	1	3	0	0	1	0	1	0	1.242	-1.262	-0.544	-1.337	-0.279	0.24532	-2	0	0	0	-5	0	3	-3	1	-1	-2	-1	-1	-2	-4	1	3
1	0.24019	1	4	-1	3	1	1	0	1	0	-2	-3	0	-1	-5	-4	-1	-1	-5	-4	-2	1	0	0	0	1	0.44	2.897	1.502	1.538	-0.055	0.30531	-1	-4	-5	-5	-4	-4	-4	-5	0	1	5	-1	1	0	-2	-2	-3
1	0.96845	-1	0	0	1	-5	-1	3	0	1	-4	-1	0	-4	-2	1	2	-1	-5	-4	-1	0	0	1	0	1	0.113	-0.837	1.477	1.357	-1.453	0.96921	1	0	0	3	2	-1	3	-1	3	-4	-3	-1	-1	-5	-2	1	-2
1	0.9653	0	0	-4	0	0	-4	-2	-2	-4	1	2	-4	1	-3	0	1	0	-4	1	3	0	0	1	1	0	1.266	-0.912	-1.505	-1.019	-0.987	0.96377	0	2	-3	0	0	0	-2	3	2	-2	-2	0	-4	-5	2	1	-2
1	0.95862	-1	2	1	-3	-5	2	-1	0	7	-5	-3	0	-4	-4	-1	1	-3	1	0	-4	0	0	1	1	0	-1.474	-0.078	-1.673	0.336	-0.417	0.95754	-1	0	0	-2	5	3	-1	1	0	-4	-2	-2	-3	0	-3	2	-1
1	0.5932	0	2	0	-1	0	2	0	-2	-1	-1	-1	4	-1	-5	1	0	0	-5	-4	-1	1	0	0	0	1	-0.277	1.648	0.533	1.831	-0.561	0.55856	-2	2	-2	-4	-2	-1	-4	-4	-2	2	-1	3	0	-4	-1	-2	1
1	0.35963	-1	0	-2	-2	-4	0	1	-5	1	-3	-2	-1	-3	2	5	-1	-2	-4	2	-3	0	0	1	0	1	0.421	-1.392	-1.628	0.189	2.081	0.3026	-3	-2	7	2	-5	-1	-3	-4	-2	-6	-4	-3	-5	-6	-5	1	-1
1	0.10064	-3	-5	-5	-5	-3	-4	-5	-6	-4	6	3	-5	0	-1	-5	-4	-3	0	1	1	1	0	0	1	0	1.266	-0.912	-1.505	-1.019	-0.987	0.10689	-2	-3	0	5	-3	-1	4	2	1	-4	-5	-2	-4	-5	-3	-1	-3
1	0.27818	-1	1	2	1	-3	3	1	-2	3	-3	-3	3	-2	-3	0	0	-3	-4	-1	-3	0	0	1	0	1	-0.277	1.648	0.533	1.831	-0.561	0.28026	-4	-4	-6	-4	-3	-4	-3	-6	-6	5	4	-5	0	0	0	-3	-4
1	0.23791	0	3	-1	-4	2	3	-1	-3	0	-3	-3	3	-1	-5	1	2	-1	-6	-3	-3	0	0	1	0	1	-0.503	-1.853	-3.005	0.931	-0.179	0.2406	-2	1	4	-1	-2	2	-1	-2	4	-4	-4	2	-4	-4	-2	1	1
1	0.16933	0	-1	3	-3	1	0	-2	-1	2	-4	-4	-1	-5	-2	-5	4	3	-4	-3	-2	0	0	1	1	0	0.67	-2.647	-4.76	-0.228	1.399	0.18855	-4	-6	-6	-7	-5	-5	-6	-7	-6	1	6	-6	0	-1	-6	-6	-4
1	0.30958	-3	-1	4	2	0	1	0	2	4	-4	-4	-1	-3	-2	-5	0	-3	4	1	-5	0	0	1	1	0	0.67	-2.647	-4.76	-0.228	1.399	0.3144	-4	-2	8	-2	1	-3	-3	-3	0	-4	-5	-3	-3	-2	-4	1	0
1	0.23875	2	0	-1	-3	1	-1	0	-1	1	1	2	-1	-1	-2	-3	0	-1	-5	0	0	1	0	0	1	0	-1.02	-0.255	-0.862	-1.343	0.465	0.25204	-3	-5	-6	-7	-5	-4	-5	-6	-5	3	6	-6	0	1	-6	-4	-4
1	0.20243	-3	-4	-3	-3	-1	-3	-1	-2	-2	-5	-4	-2	-5	-6	8	-2	-4	-6	-5	-3	0	0	1	1	0	0.421	-1.392	-1.628	0.189	2.081	0.21746	-1	-1	2	1	-1	-3	-3	-2	-2	-5	-5	-1	-4	-5	0	6	0
1	0.35631	-1	-4	-2	-3	-4	-3	-3	7	-3	-5	-4	-3	-4	-4	-3	-2	-3	1	-4	-4	0	0	1	1	0	1.045	2.064	1.33	-0.384	1.652	0.37548	-3	0	-1	-3	-4	-1	-2	-3	-3	0	-4	7	-3	-4	-3	0	-2
1	0.24088	1	-4	-4	-2	8	-2	-4	-4	-4	3	-1	-1	1	-1	-4	-1	-1	-4	-2	2	1	0	0	1	0	-1.02	-0.255	-0.862	-1.343	0.465	0.25804	-1	-4	-4	-4	1	-4	-2	-2	-4	1	4	-2	3	-3	-4	-2	2
1	0.399	-2	-4	0	0	-5	-1	-1	-1	0	-1	-1	-1	4	1	-5	-1	1	8	1	-2	0	0	1	1	0	-2.128	-0.184	0.672	-0.595	0.009	0.34234	-1	-2	0	5	-1	-3	1	-3	-4	-2	-1	0	-4	-2	-1	0	-2
1	0.99466	0	-1	0	2	-4	2	5	-2	-1	-4	-3	1	-2	-4	-2	0	-1	-4	-3	-3	0	0	1	0	1	0.113	-0.837	1.477	1.357	-1.453	0.99515	-1	-4	-3	-4	10	-3	-4	-3	-3	-2	-2	-4	-2	-2	-3	-1	-1
1	0.99515	-1	-4	-3	-4	10	-3	-4	-3	-3	-2	-2	-4	-2	-2	-3	-1	-1	-2	1	-1	0	0	1	1	0	-1.02	-0.255	-0.862	-1.343	0.465	0.99546	-1	3	-1	-1	-4	1	0	-2	-1	-3	-3	5	-2	-4	-2	-1	-1
1	0.99574	-1	-4	-3	-4	10	-4	-4	-3	-4	-2	-2	-4	-2	-3	-3	-1	-1	-3	-3	-1	0	0	1	1	0	-1.02	-0.255	-0.862	-1.343	0.465	0.9959	0	-2	0	-2	-1	-1	-1	-2	-2	-1	-2	-1	-1	-3	0	1	5
1	0.9959	0	-2	0	-2	-1	-1	-1	-2	-2	-1	-2	-1	-1	-3	0	1	5	-3	-2	-1	0	0	1	0	1	0.908	1.313	2.213	-0.032	0.326	0.99597	1	-1	0	-1	-1	-1	-1	-1	-1	-3	-3	-1	-2	-1	-1	5	1
1	0.11313	-3	0	2	0	0	1	5	2	2	-6	-5	0	-3	-6	-4	-2	-3	-6	-5	-5	0	0	1	0	1	0.113	-0.837	1.477	1.357	-1.453	0.13531	-2	-1	2	1	-5	0	2	5	1	-5	-6	-1	-4	-6	-4	-1	-3
1	0.31423	-3	1	-3	-1	-5	0	6	-2	-3	1	-4	2	-4	-5	-4	-3	-3	-5	-4	1	1	0	0	0	1	0.113	-0.837	1.477	1.357	-1.453	0.32748	-2	0	-1	1	-6	2	6	-3	-2	-5	-5	3	-2	-6	-4	-1	-2
1	0.064362	-4	7	-3	-4	-2	-1	-2	-5	-3	-5	-5	5	-4	-5	-4	-3	-2	-5	-4	-5	0	0	1	0	1	0.44	2.897	1.502	1.538	-0.055	0.06085	-4	7	-2	-4	-6	-1	-2	-5	-2	-5	-5	4	-4	-5	-4	-3	-3
1	0.35665	-2	-2	-1	-1	-2	1	0	-2	-4	0	-4	4	-4	-5	5	-1	1	-5	-4	-4	0	0	1	0	1	-0.277	1.648	0.533	1.831	-0.561	0.38239	-3	-1	6	-1	0	-1	1	-1	-3	0	-2	2	-4	-4	-4	-1	-2
1	0.28103	-2	-2	-3	-3	-2	-2	-3	-3	-3	3	2	-1	5	-1	-3	-2	0	-3	1	2	1	0	0	1	0	-1.005	1.212	2.219	-0.663	-1.524	0.29095	2	-2	3	1	-2	-1	0	-1	0	-1	-2	0	-2	-2	-2	0	2
1	0.53634	-1	1	4	-1	0	0	-1	2	-2	-3	-3	1	-2	-1	-1	0	-1	-3	1	-2	0	0	1	0	1	-0.169	0.933	1.299	0.945	0.828	0.46106	0	-2	-1	-1	0	-2	-2	3	-2	2	-1	-2	2	-2	-2	-1	1
1	0.99178	0	-2	-1	3	-5	0	4	-4	-3	-4	-2	-2	-4	-3	1	1	0	1	-4	0	0	0	1	0	1	0.113	-0.837	1.477	1.357	-1.453	0.99171	0	0	-3	0	-5	0	2	-1	-3	-2	-2	4	-1	-4	-1	1	-1
1	0.99741	1	-1	-3	2	0	-2	2	-2	1	-2	-2	1	-2	-3	1	0	2	0	-4	-1	0	0	1	0	1	0.908	1.313	2.213	-0.032	0.326	0.99758	-1	0	-2	0	0	1	3	-3	-1	-4	-2	4	-4	-2	1	1	-2
1	0.85318	0	1	-1	-1	-4	-3	-1	0	-4	-4	-4	2	-4	-5	6	0	0	-5	-4	-2	0	0	1	0	1	0.421	-1.392	-1.628	0.189	2.081	0.82922	0	-1	-1	-1	-4	-3	0	-1	-4	-4	-3	2	-1	-5	5	2	-1
1	0.7255	-1	1	1	-1	-4	2	2	-4	-1	-2	-3	2	-2	-4	-2	2	1	-6	-2	0	0	1	0	0	1	0.113	-0.837	1.477	1.357	-1.453	0.66247	2	-2	-2	-3	-1	-3	-2	-3	-1	0	-2	0	-1	-3	-1	0	4
1	0.39065	0	-1	3	0	0	0	-1	2	1	-4	-4	-1	0	-2	3	1	-1	-6	-3	-3	0	0	1	0	1	-1.474	-0.078	-1.673	0.336	-0.417	0.38243	-4	-5	-5	-4	-4	-4	-5	-6	-5	3	3	-5	-1	7	-3	-2	-3
1	0.1924	2	-1	0	0	2	0	-1	0	0	0	-2	1	-3	-4	2	1	0	-5	-4	-2	0	1	0	1	0	1.57	-0.146	-0.733	-0.591	-1.302	0.16481	-1	0	-3	-2	1	0	-1	0	-4	-1	2	2	2	1	-2	-2	0
1	0.18519	-4	-4	-5	-5	-1	-4	-5	-5	-3	2	3	-4	3	6	-5	-4	-2	-2	3	-2	1	0	0	1	0	1.266	-0.912	-1.505	-1.019	-0.987	0.15315	2	-2	0	2	-4	0	4	1	-3	-4	-4	-1	-4	-1	-3	1	-1
1	0	0	0	0	0	0	0	0	0	0	0	0	0	0	0	0	0	0	0	0	0	0	0	0	0	0	0	0	0	0	0	0	0	0	0	0	0	0	0	0	0	0	0	0	0	0	0	0	0
1	0.3272	-2	0	4	5	-3	-1	0	-1	0	-3	-3	-1	-1	-2	-1	-1	-1	-3	2	-3	0	0	1	0	1	-0.259	-3.242	-3.656	1.05	0.302	0.38584	-2	0	-1	-2	-1	-3	-3	-3	1	2	3	-3	0	0	-2	-2	-1
1	0.36475	4	-3	-3	-3	-3	-3	0	4	-3	-2	-4	-1	-3	-4	-3	1	0	-4	-4	-2	0	0	1	1	0	1.045	2.064	1.33	-0.384	1.652	0.34716	-2	-3	-3	-1	-5	1	0	1	-4	-5	-5	-1	-4	-5	7	-3	-3
1	0.3858	-1	-1	-2	-2	-2	-2	-2	-2	-1	1	0	-2	-1	-2	0	0	-1	-2	-1	5	0	1	0	1	0	1.242	-1.262	-0.544	-1.337	-0.279	0.4395	0	1	1	-1	-2	2	-1	-2	-1	0	-1	3	0	-2	-1	-1	2
1	0	0	0	0	0	0	0	0	0	0	0	0	0	0	0	0	0	0	0	0	0	0	0	0	0	0	0	0	0	0	0	0	0	0	0	0	0	0	0	0	0	0	0	0	0	0	0	0	0
1	0.266	6	-4	-4	-4	-1	-3	-3	-2	-4	-1	-1	-3	-3	-4	-3	-1	-2	-5	-4	0	1	0	0	1	0	1.57	-0.146	-0.733	-0.591	-1.302	0.24449	-3	-3	-5	-5	-1	0	-4	-6	-3	2	5	-1	0	2	-4	-4	-3
1	0.09595	-4	-3	-4	-5	-4	5	-3	-5	-4	4	4	-3	0	-3	-5	-4	-3	-4	-4	0	0	1	0	1	0	0.393	0.816	2.131	-1.239	-0.547	0.083477	-4	-4	-5	-6	-3	-4	-4	-6	0	-4	-3	-4	-3	1	-5	-4	-4
1	0.23036	-2	0	0	-2	-4	1	2	-3	4	-4	-3	1	-3	0	-3	1	3	-3	3	-3	0	0	1	0	1	-0.503	-1.853	-3.005	0.931	-0.179	0.22547	5	-4	-4	-5	8	-4	-3	-3	-3	-4	-4	-4	-4	-5	-4	-2	-3
1	0.58205	-2	-1	1	-1	-3	0	-2	0	3	-1	-2	-1	-1	1	4	1	1	-4	0	-2	0	0	1	0	1	0.67	-2.647	-4.76	-0.228	1.399	0.48969	0	-1	-2	-1	-4	-1	-1	-2	2	-4	-2	-1	0	-3	6	0	0
1	0.78005	0	0	-1	2	-4	2	4	-2	-2	-3	0	-1	-2	-2	-3	2	-1	-4	-3	-4	1	0	0	0	1	-0.259	-3.242	-3.656	1.05	0.302	0.78425	-3	-4	-5	-5	-2	2	-4	-5	-4	5	4	-4	0	0	-4	-4	-2
1	0.040697	-4	-5	-4	-5	-4	-5	-6	-6	-6	8	-1	-5	-1	-2	-5	-5	-3	-5	-4	1	0	1	0	1	0	0.393	0.816	2.131	-1.239	-0.547	0.040113	5	-4	-4	-4	-3	-3	-4	-1	-4	-3	2	-3	-2	-4	-3	0	-2
1	0.18399	-1	-2	2	4	-5	2	1	1	-2	-2	-4	1	-4	-5	1	0	0	-5	-5	0	0	0	1	0	1	0.908	1.313	2.213	-0.032	0.326	0.15659	-1	-3	-1	-2	0	-3	-4	6	-2	-4	-2	-2	-2	-4	-2	-1	-2
1	0.51968	-1	-3	-2	2	-6	3	6	-3	1	-5	-1	-1	-4	-5	-4	-2	-3	-5	-4	-5	1	0	0	0	1	-0.503	-1.853	-3.005	0.931	-0.179	0.50379	3	3	-1	-2	-2	0	1	-1	-2	-3	-3	2	2	-5	-4	0	0
1	0.65066	1	0	-2	-2	-2	0	-1	-2	-2	2	-1	-1	2	-1	-2	-1	-1	-3	-2	4	0	1	0	1	0	1.57	-0.146	-0.733	-0.591	-1.302	0.64043	-2	-1	2	-2	-3	2	2	-2	1	1	-2	1	-2	-3	-1	1	2
1	0.38617	-2	1	-2	0	-2	1	4	-5	-3	-2	-2	2	-2	-2	-4	1	0	-5	2	-1	0	1	0	0	1	0.67	-2.647	-4.76	-0.228	1.399	0.4218	-2	-4	-5	-5	0	0	-1	-5	-1	4	2	-2	3	-1	-5	-3	-1
1	0.56182	1	2	-2	-3	-4	2	-2	-3	-2	-1	-3	5	-1	-4	-3	-2	1	-4	-3	2	0	0	1	0	1	-0.277	1.648	0.533	1.831	-0.561	0.55943	-1	-2	1	1	-4	6	2	-2	-2	-5	-4	-1	-3	-5	-1	3	-2
1	0.42013	-1	-1	0	1	-5	4	4	-4	-2	-4	0	2	-3	-4	-3	-1	-1	-5	-4	-4	1	0	0	0	1	-0.503	-1.853	-3.005	0.931	-0.179	0.43429	5	-4	-4	-4	1	-3	-3	-2	-4	-1	-2	-3	2	-4	-3	0	-1
1	0.5407	-4	-1	-4	-1	-2	-3	1	-5	0	-2	-3	-1	-3	4	-5	-2	-1	-1	8	-4	0	0	1	1	0	-0.838	1.512	3.097	0.26	0.83	0.54948	-2	-2	-2	1	-5	0	-1	2	-2	-5	-5	0	-2	-6	7	-2	0
1	0.83257	-1	-1	1	-1	-2	2	-1	-2	-1	3	1	-1	-1	-1	-1	-1	1	-2	-1	1	1	0	0	1	0	0.393	0.816	2.131	-1.239	-0.547	0.83571	-1	2	-1	-1	-2	3	0	-2	2	-2	0	2	-1	-2	-1	1	-1
1	0.99961	0	-3	-4	-4	-3	-3	-1	-4	-4	4	3	0	-1	-3	-4	1	0	-4	-3	1	0	0	1	0	1	0.393	0.816	2.131	-1.239	-0.547	0.99964	1	-3	-2	6	-4	-2	1	-3	-3	-1	-4	-1	-4	-5	-1	-2	1
1	0	0	0	0	0	0	0	0	0	0	0	0	0	0	0	0	0	0	0	0	0	0	0	0	0	0	0	0	0	0	0	0.88067	-3	-3	-4	-5	-3	-3	-4	-5	-4	0	3	-3	9	-2	-5	-4	-3
1	0.26077	-2	0	2	0	-4	-2	-1	5	-4	-2	-4	-1	-2	-5	1	0	1	-5	-5	-3	0	0	1	0	1	1.045	2.064	1.33	-0.384	1.652	0.14777	-3	-1	-1	4	-5	3	2	-3	4	-4	-3	0	-2	1	0	0	1
1	0.22909	-2	-4	-4	-4	0	-3	-4	-4	-4	3	0	-3	2	-3	-4	-1	0	-4	-3	5	0	1	0	1	0	1.242	-1.262	-0.544	-1.337	-0.279	0.21243	2	-3	0	-3	4	-2	-3	1	-3	-2	-3	-3	-3	-4	-3	4	1
1	0.11391	2	-2	-2	2	-5	-1	3	-3	-4	-5	-4	1	-4	-5	5	-1	-2	-6	-5	-2	1	0	0	0	1	-0.259	-3.242	-3.656	1.05	0.302	0.13386	-4	-5	-6	-6	-4	-5	-6	-6	-6	7	0	-5	-1	-3	1	-5	-3
1	0.46317	-4	-3	8	-1	-5	-2	-3	-3	-2	-6	-6	-2	-5	-5	-4	-2	-1	-6	-4	-5	0	0	1	1	0	-0.169	0.933	1.299	0.945	0.828	0.50637	2	2	3	-3	2	-2	-2	2	1	-4	-3	2	-1	-5	-4	-1	-1
1	0.19884	-1	0	1	-1	-1	-2	-1	1	3	-4	-4	-2	-4	-2	-4	3	4	-5	-2	-4	0	0	1	0	1	-1.474	-0.078	-1.673	0.336	-0.417	0.19318	-2	2	0	-1	-5	2	0	4	-1	-6	-5	2	-4	-6	-4	-1	-4
1	0.083121	1	-3	-2	-3	-3	-3	-3	6	-3	-4	-4	-1	-4	-4	-3	-1	0	-4	-4	-4	0	0	1	1	0	1.045	2.064	1.33	-0.384	1.652	0.056636	-2	0	-2	-2	-4	7	1	-4	2	-3	-3	0	-2	-3	-3	-2	-2
1	0.50594	1	-4	-3	-3	-1	-3	-3	-3	-4	1	-3	-3	-3	-4	7	1	-2	-5	-4	-2	0	0	1	1	0	0.421	-1.392	-1.628	0.189	2.081	0.56712	-2	2	-2	-2	-4	7	-1	-3	-2	-4	-2	-1	-2	-4	1	1	-2
1	0.075805	-4	-5	-5	-6	-3	-5	-5	-6	-1	1	1	-5	-2	6	-6	-5	-4	3	7	-1	0	1	0	1	0	1.266	-0.912	-1.505	-1.019	-0.987	0.065697	1	-5	-5	-6	8	-5	-5	-5	-4	1	-2	-5	-2	-4	-5	-3	-2
1	0.46327	-3	-5	-2	-5	1	-4	-4	-4	-2	5	1	-2	0	-4	-2	-3	3	-5	-3	3	0	0	1	1	0	1.242	-1.262	-0.544	-1.337	-0.279	0.50241	-2	-1	-2	-2	-4	0	-1	-3	-2	3	-1	-1	-3	1	-1	2	3
1	0.22889	0	0	0	-1	0	0	0	-1	3	-2	-2	0	-1	-2	1	0	3	-2	-1	-1	0	0	1	0	1	1.57	-0.146	-0.733	-0.591	-1.302	0.1702	-2	-1	2	4	-3	1	1	-2	1	-2	-1	0	-2	-2	1	-1	-1
1	0.012284	-1	-4	-3	-4	1	-3	-3	-3	-4	-1	-3	-3	-3	-2	-3	3	6	-5	-4	-1	1	0	0	1	0	0.908	1.313	2.213	-0.032	0.326	0.012683	-1	-5	-5	-6	-2	-5	-5	-3	-5	3	2	-5	2	6	-5	-3	-1
1	0.18393	1	0	-1	-1	-4	-1	-2	0	-3	0	-2	-3	-3	1	-1	3	1	-4	1	-1	0	1	0	1	0	0.67	-2.647	-4.76	-0.228	1.399	0.21918	-1	-2	3	-1	-4	4	-1	0	2	-3	-2	1	0	-2	-3	2	1
1	0.38609	-2	2	0	1	-3	2	1	0	0	-2	-1	1	-3	-2	3	-2	0	0	-3	-2	0	0	1	0	1	0.421	-1.392	-1.628	0.189	2.081	0.27981	1	-1	1	1	-1	1	0	-2	-2	-2	-2	0	-2	-2	1	2	2
1	0.66776	0	0	2	1	-4	0	0	3	-3	-3	-4	0	-4	-3	0	2	0	-1	-2	-3	0	0	1	0	1	0.44	2.897	1.502	1.538	-0.055	0.61903	1	-3	-2	-3	-3	-2	-1	1	0	3	-1	-2	-2	0	-3	-1	1
1	0.8157	-1	3	-2	-3	-2	0	-1	-4	-2	-3	-3	6	-3	-5	-3	-1	0	-5	-2	-2	0	1	0	0	1	-0.277	1.648	0.533	1.831	-0.561	0.80518	-3	-4	-3	-3	-1	-3	-3	-4	-4	-4	-4	-3	-4	-5	7	-2	4
1	0.31003	-1	-3	3	1	1	-2	-1	-1	-2	-1	-2	-1	-3	1	-3	0	0	3	5	-1	0	1	0	1	0	-0.838	1.512	3.097	0.26	0.83	0.29679	3	-3	-3	-3	-2	-1	-1	-2	-3	5	-1	-3	-2	-1	-3	-2	-2
1	0.48796	-3	-4	-3	-4	-4	-4	-4	-4	-5	-4	-4	-4	-4	-5	-4	1	7	-6	-5	-3	1	0	0	0	1	0.908	1.313	2.213	-0.032	0.326	0.46708	0	-2	-1	-4	-4	8	-2	-5	2	-2	-3	-2	-2	-6	-4	-3	-3
1	0.011042	-3	7	-2	-4	-4	-1	-2	-4	-1	-2	-3	3	-3	0	-4	-2	-3	-1	-3	-4	1	0	0	1	0	0.44	2.897	1.502	1.538	-0.055	0.008968	-4	-4	-1	8	-6	-1	-1	-4	-1	-5	-6	-3	-5	-6	-4	-2	-2
1	0.63163	2	-1	1	4	0	4	-1	-3	-3	-3	-4	0	-3	-4	-2	1	0	-5	-2	-2	0	0	1	0	1	-0.503	-1.853	-3.005	0.931	-0.179	0.60957	0	1	-1	-1	-4	0	2	-2	-1	-4	-4	1	-4	-3	6	0	-1
1	0.12146	-2	-4	-4	-4	-3	-3	-4	-4	-4	0	3	-4	0	-2	-4	2	0	-4	-3	4	0	0	1	0	1	1.242	-1.262	-0.544	-1.337	-0.279	0.12693	-4	-1	-5	-5	-4	1	-4	-5	-4	-1	3	-2	6	4	-5	-4	-3
1	0.57562	-5	-6	-5	-6	-5	-6	-6	-6	-3	-2	0	-6	0	9	-6	-5	-5	0	1	-1	0	0	1	1	0	-0.397	0.412	1.891	-1.006	-0.59	0.56446	-3	-4	-5	-6	-4	-4	-5	-6	-5	4	3	-2	7	-2	-6	-5	-4
1	0.50234	4	2	-1	0	-1	1	-2	-2	1	-4	-3	3	-4	-5	-4	-1	-2	1	-4	-2	0	0	1	0	1	1.57	-0.146	-0.733	-0.591	-1.302	0.48672	-1	-2	2	4	-1	-2	0	1	2	-3	-2	0	-1	-3	-4	0	-1
1	0.27806	-4	-5	-6	-6	-4	-4	-6	-6	-6	4	5	-5	2	-1	-6	-5	-4	-4	-4	0	1	0	0	1	0	1.266	-0.912	-1.505	-1.019	-0.987	0.22722	0	4	-2	-3	-4	0	-2	-3	-2	-3	-2	6	-3	-5	-4	-2	-2
1	0.30006	-5	-5	-6	-6	-5	-6	-6	-6	-4	-3	-2	-6	-3	9	-6	-5	-5	3	2	-2	0	1	0	1	0	-0.397	0.412	1.891	-1.006	-0.59	0.26789	0	0	-3	-4	-4	0	-3	-2	-4	4	-1	0	-1	0	-4	0	0
1	0.11097	1	0	-1	0	-4	-1	1	0	1	-3	1	1	-3	-3	-4	0	2	4	-1	-1	0	0	1	0	1	0.44	2.897	1.502	1.538	-0.055	0.10947	-1	-4	-1	1	-1	0	-1	-3	-2	-3	-5	-3	-4	-5	3	4	3
1	0.2268	0	-3	-2	0	-5	-2	1	1	-1	-5	-5	-2	-5	-6	7	0	-2	-6	-4	-5	0	0	1	0	1	1.57	-0.146	-0.733	-0.591	-1.302	0.21715	-3	-3	-6	-6	-3	-5	-5	-6	-6	3	-2	-5	-1	-3	-5	-4	-3
1	0.29479	-1	-2	-1	4	-3	-1	0	-3	-2	-1	-2	-1	-2	-3	3	0	-1	-3	-3	2	1	0	0	1	0	1.242	-1.262	-0.544	-1.337	-0.279	0.23505	0	1	0	1	-4	1	3	-2	3	-4	-4	2	-3	-4	3	0	-2
1	0.2475	-2	1	0	-2	-5	1	1	-4	0	-2	-3	6	2	-4	-3	-1	-2	-5	-3	-1	1	0	0	1	0	-0.277	1.648	0.533	1.831	-0.561	0.21205	5	-4	-3	-4	-3	-3	-3	-1	-3	-3	-3	-3	-3	4	-3	0	-1
1	0.36546	-1	2	0	-3	-4	1	-1	-3	2	1	-2	1	2	0	-4	-1	2	-4	0	1	1	0	0	0	1	0.393	0.816	2.131	-1.239	-0.547	0.3686	-2	1	4	-2	-4	-2	-3	6	-2	-5	-5	-2	-4	-5	-2	-1	-3
1	0.42866	0	-2	0	4	-1	0	1	0	3	-2	-3	0	0	-3	-1	0	0	-5	-3	-2	0	0	1	0	1	-0.259	-3.242	-3.656	1.05	0.302	0.40607	1	-1	0	1	-2	-2	0	-2	-2	0	3	-1	1	-1	0	0	0
1	0.15346	-1	-3	-1	-1	-3	1	4	-2	-3	0	-2	-2	-3	-4	-3	-1	4	-4	-3	0	0	1	0	0	1	0.908	1.313	2.213	-0.032	0.326	0.14229	2	-3	-3	-2	-3	-3	0	-1	-3	2	-1	-2	-2	-2	-3	-3	-2
1	0.32135	-3	-4	-5	-6	-3	-4	-5	-6	-4	6	-1	-5	2	-3	2	-3	-2	-5	-3	3	0	1	0	1	0	0.393	0.816	2.131	-1.239	-0.547	0.36353	-3	5	-2	1	0	-3	0	-5	4	-1	1	-2	0	-2	-5	-3	-4
1	0.6157	1	2	-1	0	-4	1	-1	-2	-1	-4	-2	1	-3	-4	5	-1	-1	-4	0	-2	0	0	1	0	1	0.421	-1.392	-1.628	0.189	2.081	0.59847	2	-1	-2	2	-4	-2	0	-1	-3	-1	-2	2	-3	-4	1	3	1
1	0.084659	-3	-4	-4	-5	-1	-4	-4	-5	-3	-2	-2	-3	-3	3	-4	-4	-1	11	3	-3	1	0	0	1	0	-2.128	-0.184	0.672	-0.595	0.009	0.065949	-2	-5	-6	-6	-3	-5	-5	-6	-5	3	5	-5	2	4	-5	-4	-4
1	0.38936	0	1	1	2	-5	2	2	-3	0	-2	-3	3	-2	-3	-3	1	0	-6	-4	-2	1	0	0	0	1	-0.277	1.648	0.533	1.831	-0.561	0.35055	-3	-6	-6	-6	-2	-3	-3	-2	-1	-2	-3	-4	-4	7	-6	-4	-5
1	0.94407	-1	-2	-4	-2	-5	-3	1	-3	-2	-2	-3	0	-4	-2	6	0	0	-5	-4	1	0	0	1	0	1	0.421	-1.392	-1.628	0.189	2.081	0.94522	0	-1	-2	-1	-5	1	5	-2	-1	-4	-3	1	-4	-4	2	0	0
1	0.27909	-1	2	-2	-3	-5	3	0	-3	-2	-2	-2	3	-3	-3	2	0	1	-5	-4	0	0	0	1	0	1	-0.503	-1.853	-3.005	0.931	-0.179	0.31802	-1	0	2	0	-2	1	0	-2	4	-2	-3	1	-2	-1	-4	0	0
1	0.16599	-2	3	-2	-2	-6	1	0	-3	-4	-3	-3	6	-1	-2	-3	0	-2	-5	-3	-3	1	0	0	0	1	-0.277	1.648	0.533	1.831	-0.561	0.17763	-1	1	-1	0	-3	1	2	-3	-4	-3	-2	5	-1	-4	-4	0	-3
1	0.32507	-4	-4	-4	-5	-2	-4	-5	-5	1	-4	-3	-4	-4	2	-5	-4	-4	2	9	-3	0	1	0	1	0	-0.838	1.512	3.097	0.26	0.83	0.28376	-2	-2	4	-1	-3	1	-3	-5	-1	0	3	-3	-1	-1	-3	0	-3
1	0.059238	0	-4	-2	-3	-2	-3	-3	-3	-4	-4	-3	-3	-4	-5	-4	6	3	-5	-4	-3	1	0	0	1	0	0.908	1.313	2.213	-0.032	0.326	0.064799	-3	0	-3	-3	-6	0	-2	-4	-3	-5	-3	7	-1	-6	-4	-2	-3
1	0.38077	-1	-3	-2	-3	-1	1	-2	-2	-1	1	0	-2	1	3	4	0	1	-3	0	-2	0	0	1	1	0	1.266	-0.912	-1.505	-1.019	-0.987	0.28479	0	-2	0	-1	-2	-1	-2	1	-2	-3	-3	-1	0	-2	5	1	-1
1	0.36982	1	1	1	-1	-4	2	3	-2	0	-4	-3	3	-2	-4	1	0	-1	-4	-3	-3	0	0	1	0	1	-0.503	-1.853	-3.005	0.931	-0.179	0.27126	-2	0	-2	-3	-1	-2	-2	0	-1	2	2	-3	0	1	1	-1	1
1	0.19533	0	-2	-2	-3	1	-4	-3	6	-4	-5	-4	-3	-4	-5	0	-1	-2	-5	-5	-5	0	0	1	1	0	0.908	1.313	2.213	-0.032	0.326	0.14682	-1	1	-1	0	-5	0	2	-1	-1	-5	-3	3	-4	-5	4	-1	0
1	0.066929	-3	-4	-5	-5	-3	-4	-4	-5	-4	4	5	-4	0	-1	-4	-4	-3	1	-3	0	1	0	0	1	0	1.266	-0.912	-1.505	-1.019	-0.987	0.049774	-1	-1	-1	-1	1	-1	-2	0	3	1	1	-1	2	-1	-2	1	-1
1	0.097985	6	-3	-3	-3	2	-3	-3	-1	-3	-1	-3	-3	-2	-4	-3	0	0	-4	-4	-2	1	0	0	1	0	1.57	-0.146	-0.733	-0.591	-1.302	0.089955	-2	5	-2	-3	-5	1	-1	-2	-2	-5	-4	5	-3	-5	-3	1	-2
1	0.12454	-3	1	2	0	-2	1	1	-3	-1	-2	-2	1	-1	-3	-3	0	4	-5	-2	-1	0	0	1	0	1	0.44	2.897	1.502	1.538	-0.055	0.10288	-2	-1	0	2	-3	-2	-2	-3	-1	-3	-3	-2	-3	-4	-3	1	6
1	0.27587	3	-4	-3	-4	-4	-4	-4	6	-4	-5	-5	-4	-4	-5	0	-1	-3	-5	-5	-4	0	1	0	1	0	1.045	2.064	1.33	-0.384	1.652	0.28209	-3	-5	-5	-5	4	-4	-5	-2	-5	0	5	-5	-1	1	-5	-4	-4
1	0.2638	-1	2	1	-1	-1	1	1	-4	1	-4	-4	1	-3	-4	-3	3	3	-6	-3	-2	0	0	1	0	1	-0.503	-1.853	-3.005	0.931	-0.179	0.21223	-5	-5	-5	-6	-5	-5	-5	-6	1	-3	-4	-5	-4	3	-6	-5	-5
1	0.66945	-2	-4	-5	-5	-3	-4	-4	-5	-4	0	5	-4	1	0	0	-4	-1	-3	-2	-1	1	0	0	1	0	1.266	-0.912	-1.505	-1.019	-0.987	0.66729	-3	-2	0	0	-2	0	-2	-4	9	-4	-4	-2	-3	-1	-4	-1	-3
1	0.6818	1	1	1	1	0	1	-1	-2	-1	0	-3	1	-2	-4	-3	1	3	-4	-3	1	0	0	1	0	1	-0.503	-1.853	-3.005	0.931	-0.179	0.69602	-2	-1	1	0	0	3	2	-1	3	-3	-1	2	0	-4	0	0	1
1	0.083216	5	0	0	-1	-1	-1	-2	-3	-3	-4	-1	1	-3	-4	-4	1	-2	-3	-2	-3	0	0	1	0	1	0.67	-2.647	-4.76	-0.228	1.399	0.0945	1	4	2	3	-5	1	0	0	-1	-5	-4	-1	-4	-5	-3	1	0
1	0.089431	-2	7	-3	-4	1	-1	-2	-5	-3	-5	-5	3	-4	-5	-4	-2	-3	-5	-4	-4	1	0	0	1	0	0.44	2.897	1.502	1.538	-0.055	0.079269	4	-2	-1	0	-4	0	4	0	-3	-4	-4	2	-4	-5	-3	0	-2
1	0.071656	-4	-3	8	-1	-2	-2	-3	-3	-2	-6	-6	-2	-5	-5	-4	-1	-2	-6	-5	-5	0	0	1	1	0	-0.169	0.933	1.299	0.945	0.828	0.061164	-1	-3	-2	-3	-3	-3	-3	-3	-3	-4	-4	-3	-4	-5	-3	6	5
1	0.27155	-2	-4	-4	-4	1	-4	-4	-4	-3	2	0	-4	-1	7	-4	-3	-1	-2	0	2	0	1	0	1	0	-0.397	0.412	1.891	-1.006	-0.59	0.2604	2	-3	-2	-3	-3	-3	-3	4	-3	-3	-3	-3	-3	3	-3	2	-2
1	0.12284	-3	-3	-3	-2	-2	1	5	-4	-3	2	-3	-3	4	-4	-4	0	1	-5	-4	-2	1	0	0	0	1	0.113	-0.837	1.477	1.357	-1.453	0.1119	-4	-6	-6	-6	-4	-5	-6	-6	-6	7	0	-5	0	-3	-5	-5	-3
1	0.18689	7	-4	-4	-4	-3	-3	-3	-2	-4	-3	-4	-3	-2	-4	-3	-1	-3	-5	-4	-3	1	0	0	1	0	1.57	-0.146	-0.733	-0.591	-1.302	0.15032	-2	-1	-4	-2	0	0	3	-3	0	-2	3	1	-1	0	-5	-3	-4
1	0.10104	-2	-3	-4	-4	-2	-1	-4	-2	-6	2	0	-3	-2	-3	-4	-1	0	-6	-5	6	1	0	0	1	0	1.242	-1.262	-0.544	-1.337	-0.279	0.085257	-3	6	-3	-4	-6	1	-2	-4	-3	-1	1	3	-4	-4	-4	-2	-3
1	0.83286	0	-2	-2	-1	-3	3	1	0	1	-1	-1	0	2	-3	1	0	2	-3	-3	-2	0	0	1	0	1	-0.503	-1.853	-3.005	0.931	-0.179	0.82618	-1	-1	0	5	-3	-1	1	-3	-1	-3	0	-2	-2	-3	0	1	-1
1	0.19185	0	2	0	-1	-4	2	-2	-1	2	1	-2	-1	-1	2	-4	0	0	-3	-2	1	0	0	1	1	0	0.393	0.816	2.131	-1.239	-0.547	0.16201	-3	-3	-3	-5	-4	-3	-5	-6	-5	4	4	-4	2	2	-5	-4	-2
1	0.2618	-3	-2	1	-3	-6	4	-2	-3	9	-6	-4	-2	-4	-4	-4	-3	-2	-5	-2	-5	0	0	1	0	1	-1.474	-0.078	-1.673	0.336	-0.417	0.3164	-4	2	-2	-4	-4	-2	-3	-5	2	-3	3	4	3	1	-5	-3	-3
1	0.070167	-4	-4	-5	-5	-5	-4	-5	-5	-1	-3	-2	-4	-2	7	-5	-4	-4	0	8	-3	0	0	1	1	0	-0.838	1.512	3.097	0.26	0.83	0.071911	3	-3	-2	-3	1	-3	-3	-3	-4	-3	-4	-3	-3	-4	-3	2	5
1	0.78013	-1	-2	-1	2	-2	-1	-1	-3	-2	-1	0	-2	5	-2	-2	0	4	-3	-2	-1	0	1	0	1	0	0.908	1.313	2.213	-0.032	0.326	0.81062	-2	-2	4	-1	-2	-1	-2	-2	-1	0	3	-2	4	-1	-3	-1	-1
1	0.052215	-3	0	-2	-3	-4	-1	0	-4	7	-2	-3	4	-2	1	-4	-3	-3	-3	3	-3	0	1	0	0	1	-0.277	1.648	0.533	1.831	-0.561	0.048849	1	-4	-3	-4	5	-3	-3	-2	-2	-3	-3	-3	-2	4	-4	3	-2
1	0.17253	-2	-4	-2	-3	-4	-3	-4	7	-4	-5	-5	-3	-4	-5	-4	-2	-3	-4	-5	-5	0	0	1	1	0	1.045	2.064	1.33	-0.384	1.652	0.16014	-2	-2	-1	-3	-4	-2	-2	-4	10	-4	-4	-3	-3	0	-4	-3	-3
1	0.51939	-3	-4	-4	-4	-3	-3	-4	-4	-4	5	1	-3	7	-2	-4	-3	-1	-4	-3	2	0	0	1	1	0	0.393	0.816	2.131	-1.239	-0.547	0.5178	-1	0	-2	-3	-2	-1	0	1	0	-2	-1	1	-1	1	-3	1	2
1	0.91527	-1	-1	1	0	0	-1	-2	1	-1	-1	-3	-1	3	0	3	1	0	-5	-1	-2	0	0	1	1	0	0.67	-2.647	-4.76	-0.228	1.399	0.90743	-1	1	2	1	-5	1	0	1	1	-1	-1	0	1	-1	1	0	0
1	0.77077	0	3	1	-2	-4	1	-1	-3	-2	-3	-4	5	-3	-4	-3	-1	2	-4	-3	-1	0	0	1	0	1	-0.277	1.648	0.533	1.831	-0.561	0.79196	-3	-3	-4	-4	-3	-1	-3	-4	-4	2	1	0	8	-2	-2	-3	1
1	0.50635	-2	-4	-4	-5	-2	-4	-4	-5	-4	4	1	-4	0	-1	-4	-3	-2	-3	2	5	0	1	0	1	0	1.242	-1.262	-0.544	-1.337	-0.279	0.53194	0	1	-2	-1	-3	-1	1	-3	-3	2	1	0	-1	-3	-3	1	3
1	0.085928	-3	-2	5	-2	0	-1	-2	-3	9	-5	-5	-3	-4	-4	-4	0	-2	-5	-1	-5	0	0	1	1	0	-1.474	-0.078	-1.673	0.336	-0.417	0.094431	2	-3	4	-2	-2	-1	-2	-1	-3	-3	-4	-2	-3	-5	-1	5	1
1	0.033801	2	-5	-5	-6	-2	-3	-5	-5	-5	3	2	-5	1	-2	-5	-4	-3	-3	1	4	0	1	0	1	0	1.242	-1.262	-0.544	-1.337	-0.279	0.037936	1	0	-1	-1	-5	0	2	2	3	-3	-3	0	-4	-3	-4	0	1
1	0.74298	1	1	1	0	-4	2	1	-1	2	-5	-2	1	-4	-5	2	1	0	-5	-4	-4	0	0	1	0	1	-0.503	-1.853	-3.005	0.931	-0.179	0.78196	0	0	1	0	3	1	-3	0	3	0	-1	0	-3	1	-4	0	0
1	0.97909	0	-1	-2	1	-5	0	1	-2	-4	-2	-4	0	-1	-4	5	-1	2	-5	-5	-3	0	0	1	0	1	0.908	1.313	2.213	-0.032	0.326	0.97975	1	-5	-3	-4	-5	-4	-4	6	-4	-3	-2	-4	-1	-5	-1	-1	-4
1	0.13362	0	1	0	1	-3	0	-1	4	-2	0	-3	1	-2	-3	-1	-1	-1	-3	-3	-2	0	0	1	1	0	1.045	2.064	1.33	-0.384	1.652	0.13241	0	-2	1	5	-3	-1	3	-1	-2	-2	-3	-1	-3	-3	0	0	-1
1	0.2379	-1	-1	-2	2	1	-1	2	-3	-1	-1	1	-1	-1	-1	1	0	1	-5	-3	0	1	0	0	0	1	0.908	1.313	2.213	-0.032	0.326	0.19206	0	-1	-1	2	-2	0	4	-2	0	-4	-2	0	-3	-4	1	1	-1
1	0.72355	-2	-4	-4	-4	-5	-4	-3	1	-2	-4	-4	-3	-4	1	7	-1	-3	-4	2	-3	0	0	1	1	0	0.421	-1.392	-1.628	0.189	2.081	0.70086	-1	5	-1	-3	-5	0	-1	-2	-1	-5	-3	5	-3	-4	-2	-2	-1
1	0.40101	1	1	-2	-3	-4	6	1	-4	-2	-1	-1	1	1	0	-4	-1	-2	-5	-3	-1	1	0	0	0	1	-0.503	-1.853	-3.005	0.931	-0.179	0.37913	0	3	-1	0	-2	0	2	-4	-3	-2	2	2	0	-2	-5	-2	-1
1	0.6309	-2	1	1	5	-4	-2	1	-3	-3	-1	-3	0	-2	-2	-3	-1	-2	-4	1	2	0	0	1	0	1	0.67	-2.647	-4.76	-0.228	1.399	0.5944	-2	1	0	1	-1	1	-1	3	-3	-4	-2	4	2	-4	-3	0	-2
1	0.66117	1	-1	-1	-2	-5	2	2	-4	-4	3	0	1	3	-4	-5	-1	1	-5	-5	-1	1	0	0	0	1	0.908	1.313	2.213	-0.032	0.326	0.67414	1	-1	0	-2	-1	-1	0	-4	-4	-1	1	3	0	-1	-5	0	0
1	0.04797	-2	-4	-3	-4	-4	-4	-3	-3	-5	-3	-4	-4	-2	-6	-2	2	7	-6	-5	-3	0	0	1	1	0	0.908	1.313	2.213	-0.032	0.326	0.036695	-2	-6	-6	-7	-4	-6	-6	-5	-6	2	-1	-6	0	2	-6	-3	-3
1	0	0	0	0	0	0	0	0	0	0	0	0	0	0	0	0	0	0	0	0	0	0	0	0	0	0	0	0	0	0	0	0	0	0	0	0	0	0	0	0	0	0	0	0	0	0	0	0	0
1	0.017044	-3	-6	-6	-7	-2	-6	-6	-7	-7	6	-1	-6	-1	-3	-6	-5	-2	-6	-5	5	0	1	0	1	0	1.242	-1.262	-0.544	-1.337	-0.279	0.013693	-5	-6	-6	-7	-6	-6	-6	-7	-3	-2	-1	-6	-1	9	-7	-6	-5
1	0.80252	0	2	5	1	-4	1	-2	3	-2	-3	-4	-2	-3	-4	-3	0	-2	-4	-3	-1	0	0	1	0	1	-0.169	0.933	1.299	0.945	0.828	0.77154	-1	6	-2	-3	-1	-1	-2	1	1	-4	-3	1	-3	-3	-2	1	-2
1	0.34682	-2	-4	-5	-5	-3	-4	-4	-5	-4	2	5	-4	1	0	-4	-4	-3	-4	-3	1	0	0	1	1	0	1.266	-0.912	-1.505	-1.019	-0.987	0.34703	5	-3	-3	-4	0	-3	-3	-2	-4	1	1	-3	-2	-3	-1	0	-2
1	0.88425	1	6	-2	-2	0	1	-2	-2	0	-2	-2	0	-1	-2	-2	-2	-1	-2	0	-1	0	0	1	1	0	0.44	2.897	1.502	1.538	-0.055	0.87757	1	2	0	-1	-3	2	-2	0	0	-3	-2	-1	-2	-3	-2	2	-1
1	0.32097	-2	-1	-1	-4	-1	3	-3	-3	-3	-4	-1	-3	0	-4	6	2	-4	-3	-2	-5	0	0	1	1	0	0.67	-2.647	-4.76	-0.228	1.399	0.31691	1	1	-2	0	-5	0	0	-4	-3	-2	2	3	-1	-3	-5	1	-2
1	0.030697	-2	0	-2	-2	-1	-3	-3	-3	0	-5	-5	-3	-4	-6	-4	6	2	-6	-5	-5	0	0	1	1	0	0.67	-2.647	-4.76	-0.228	1.399	0.036763	-1	-2	-2	4	-6	0	6	-4	-1	-1	-5	-2	-5	-6	1	-3	-1
1	0.10604	1	-1	0	4	-5	1	3	-1	-2	-5	-4	-1	-3	-5	1	0	-1	-6	-2	-4	1	0	0	0	1	-0.503	-1.853	-3.005	0.931	-0.179	0.089913	2	3	-3	-3	-5	0	2	-2	-2	-4	-2	4	-1	-4	-4	-1	-3
1	0.42886	-2	-3	0	8	-5	-2	0	-3	-3	-5	-5	-2	-5	-5	-3	-2	-3	-6	-5	-5	0	0	1	0	1	-0.259	-3.242	-3.656	1.05	0.302	0.41097	-2	-2	7	-1	-4	-2	-2	3	-1	-5	-5	-2	-3	-2	-4	0	-2
1	0.76946	-3	-2	-1	4	-5	0	6	-4	-2	-5	-5	-1	-4	-5	-3	-2	-2	-5	-4	-4	1	0	0	0	1	0.113	-0.837	1.477	1.357	-1.453	0.78345	1	-3	0	-4	-3	-3	-3	-3	5	-2	2	-3	0	4	-4	-2	-3
1	0.01431	-1	4	0	0	7	-1	-3	0	2	-4	-4	-1	3	-5	-5	0	-3	-5	-3	-4	1	0	0	1	0	0.44	2.897	1.502	1.538	-0.055	0.018757	3	-5	-5	-5	-2	-4	-5	-4	-5	2	-2	-4	-1	-4	-5	0	-1
1	0.020481	7	-4	-2	-4	-3	-3	-3	-1	-4	-4	-4	-3	-3	-5	-3	-1	-2	-5	-4	-3	1	0	0	1	0	1.57	-0.146	-0.733	-0.591	-1.302	0.01696	-3	-2	-2	-3	-5	6	2	-3	0	-2	2	1	-2	-4	-3	-3	-3
1	0.069055	-1	4	0	0	-6	0	1	-4	4	-4	-3	1	-1	-1	-5	0	-2	0	3	-2	1	0	0	0	1	0.44	2.897	1.502	1.538	-0.055	0.066409	2	1	0	-4	1	1	-3	3	-3	-3	-4	-3	-3	-4	-4	3	0
1	0.29907	0	-2	0	3	-3	-2	0	2	-3	-2	-1	-1	-3	-3	1	1	2	-2	-5	0	0	0	1	0	1	1.045	2.064	1.33	-0.384	1.652	0.40032	0	-2	0	2	-3	1	2	-1	-1	-1	-1	-1	-2	-3	2	1	0
1	0.057066	-3	0	-4	-5	-1	-1	0	-5	-4	2	0	-3	8	-3	-1	-3	-3	0	-4	3	0	1	0	1	0	-1.005	1.212	2.219	-0.663	-1.524	0.036795	-4	-5	-5	-6	-4	-3	-5	-6	1	3	5	-3	2	-2	-5	-5	-4
1	0.29994	2	-2	0	-4	0	-2	-4	-1	0	2	1	-1	1	2	-4	1	0	-4	-3	1	1	0	0	1	0	1.57	-0.146	-0.733	-0.591	-1.302	0.3517	-1	0	1	-3	-1	1	-2	-4	0	0	-2	2	-1	-1	0	2	4
1	0.22059	-1	-2	-5	-5	-4	-4	-5	-5	-5	5	3	-3	2	-1	-1	-4	-3	-4	-4	2	1	0	0	1	0	1.266	-0.912	-1.505	-1.019	-0.987	0.18816	3	-4	-1	-4	0	-3	-4	-4	-4	-1	3	-4	-1	-3	-4	1	-1
1	0.076909	-2	-1	6	-1	-2	-3	-2	-1	2	-3	-4	-2	-3	-4	0	2	2	-3	-2	-3	1	0	0	1	0	0.67	-2.647	-4.76	-0.228	1.399	0.055229	1	-2	-2	-2	-1	-1	-1	-3	-2	2	-2	-2	1	-4	-2	2	4
1	0.42416	-1	-1	-3	-3	-3	-3	1	-4	-4	3	-1	-3	-1	-2	-3	-3	-2	-4	-3	5	0	1	0	1	0	0.393	0.816	2.131	-1.239	-0.547	0.39987	-2	-3	-3	0	-4	-2	-2	-3	-3	-4	-4	1	-4	-4	8	-2	-2
1	0.043854	1	-2	-3	-2	-3	2	-2	-1	4	-1	1	-1	0	-1	0	-1	2	-5	-3	1	0	1	0	1	0	1.266	-0.912	-1.505	-1.019	-0.987	0.05174	2	-3	-1	-3	-3	-2	-3	-1	-1	0	-1	-2	-2	2	-3	-2	0
1	0.07531	0	-2	2	2	-4	-1	-2	-2	0	-1	-2	-3	-1	3	-4	2	1	-1	2	-1	0	1	0	0	1	0.908	1.313	2.213	-0.032	0.326	0.055054	1	-5	-2	-4	-1	-4	-4	6	-4	-3	-5	-4	-4	-1	-4	-1	-2
1	0.047581	-3	-4	-5	-5	-2	-4	-5	-6	-5	5	4	-5	2	1	-5	-4	-3	-4	-3	1	0	1	0	1	0	0.393	0.816	2.131	-1.239	-0.547	0.03866	-1	-4	-5	-5	-3	-4	-4	-5	-4	2	-1	-4	1	-1	-4	-3	-2
1	0.29738	1	-5	-4	-3	7	-4	-4	-4	0	-3	0	-4	-1	-2	-4	3	1	-5	0	1	0	0	1	1	0	-1.02	-0.255	-0.862	-1.343	0.465	0.28238	-3	-4	-4	-4	-5	1	-3	-5	-5	-5	-3	-2	-2	-6	8	-2	0
1	0.22475	-3	3	-1	-2	-1	0	-1	-1	0	-1	1	3	-1	3	-5	-1	-1	-2	0	-2	0	0	1	0	1	-0.397	0.412	1.891	-1.006	-0.59	0.23463	-2	0	1	-2	-2	-1	-2	-5	7	-3	-4	-1	-1	1	3	-1	-3
1	0.1047	-3	6	-1	-3	0	-1	-2	-4	0	-5	-4	5	-2	-5	-3	-1	-2	-5	-3	-4	0	0	1	0	1	-0.277	1.648	0.533	1.831	-0.561	0.093145	-2	-4	-3	-3	-5	-4	-4	7	-4	-6	-5	-4	-5	-5	-4	-2	-4
1	0.17177	-1	3	0	-1	-3	2	3	-3	4	-4	-5	2	-2	-3	-3	1	-1	-5	-3	-4	0	1	0	0	1	0.67	-2.647	-4.76	-0.228	1.399	0.15877	1	1	-2	-3	-4	-1	-3	-1	-1	1	0	2	-3	-4	4	0	-2
1	0.1898	1	-4	0	-4	3	-2	-3	3	3	-1	-1	-4	-3	0	-1	-2	-2	1	-2	1	0	0	1	1	0	1.242	-1.262	-0.544	-1.337	-0.279	0.15372	-1	-1	-1	1	-4	-2	-3	5	2	-4	-2	-1	-3	-3	0	2	-2
1	0.031098	0	-2	-1	-1	-1	-1	0	-3	1	-2	-2	0	-3	-1	-4	1	1	-2	6	-1	0	1	0	1	0	-0.838	1.512	3.097	0.26	0.83	0.029476	4	-4	-3	-4	-3	-3	-3	-3	-3	-2	-2	-3	-3	2	1	2	-1
1	0.21279	-4	8	-3	-4	-6	1	-2	-5	-1	-5	-4	1	-4	-5	-4	-3	0	-5	-4	-5	1	0	0	1	0	0.44	2.897	1.502	1.538	-0.055	0.18696	-2	7	-3	-4	-6	0	-2	1	-3	-5	-4	1	-1	-5	-4	-3	-3
1	0.23558	4	-2	-2	-1	1	-2	-2	-1	-2	-2	-2	-2	-2	-2	1	2	0	-2	-2	-1	0	0	1	0	1	1.57	-0.146	-0.733	-0.591	-1.302	0.25998	-2	-1	-3	-2	-3	-2	-3	2	0	-2	0	-2	-2	7	-3	-2	-3
1	0.35877	-1	0	1	0	3	1	0	-1	2	0	-1	0	-4	1	-5	0	0	4	-3	0	0	0	1	1	0	-1.02	-0.255	-0.862	-1.343	0.465	0.36901	0	0	1	0	-5	1	0	0	-4	0	-1	0	2	1	1	0	0
1	0.33267	0	0	0	1	-1	-1	0	3	0	-1	-1	-1	0	-1	1	-1	-1	1	0	-1	0	0	1	0	1	1.045	2.064	1.33	-0.384	1.652	0.34086	-1	0	2	3	-1	-1	1	-1	-1	-2	-2	0	-2	-1	1	0	-1
1	0.055718	-1	7	-1	-1	-3	-1	-2	-3	-1	-4	-1	0	-2	-4	-4	-3	-2	-5	-3	-3	1	0	0	1	0	0.44	2.897	1.502	1.538	-0.055	0.05612	4	-4	-3	1	-2	-1	-3	-3	-4	0	1	-4	2	-1	-4	-1	-2
1	0.66364	-2	-4	-4	-4	-3	-4	-2	-5	0	2	0	-4	-1	-3	-4	-4	-2	-1	-3	6	0	0	1	1	0	1.242	-1.262	-0.544	-1.337	-0.279	0.67284	0	-1	-1	1	-2	2	4	-3	0	-1	-4	1	-2	-4	2	0	-1
1	0.005509	-3	-4	3	-4	4	-4	-4	-4	-2	-4	-5	-4	-4	-4	-4	3	6	-6	-5	-4	1	0	0	1	0	-0.169	0.933	1.299	0.945	0.828	0.00518	-4	-5	-6	-7	-4	-5	-6	-7	-6	1	6	-5	4	-2	-6	-5	-4
1	0.004131	5	-5	-5	-5	1	-4	-4	-1	-5	-1	0	-4	1	-3	-4	-1	-1	-5	-4	3	1	0	0	1	0	1.045	2.064	1.33	-0.384	1.652	0.003219	-4	-6	-6	-6	-4	-5	-6	-7	-6	7	0	-5	7	-3	-6	-5	-4
1	0.87308	1	-1	-1	-1	8	-1	-1	-1	-1	0	-1	-1	-1	-1	-1	-1	-1	-1	-1	-1	0	1	0	1	0	-1.02	-0.255	-0.862	-1.343	0.465	0.87025	0	4	-1	-1	-1	-1	-1	0	-1	1	-1	0	-1	-1	-1	-1	-1
1	0.44565	-3	-4	-5	-5	-4	0	-4	-1	-5	5	2	-1	0	-3	-4	-4	-3	-4	-4	4	0	0	1	0	1	1.266	-0.912	-1.505	-1.019	-0.987	0.47352	-1	-2	0	-5	-4	-2	-4	-5	-4	3	2	-4	6	-3	-5	-2	1
1	0.17077	-4	-5	-5	-5	-4	-5	-5	-5	-4	1	1	-3	-2	8	-5	-3	-4	-2	0	-2	0	1	0	1	0	-0.397	0.412	1.891	-1.006	-0.59	0.17932	0	-2	-2	2	-4	0	5	2	-3	-5	-4	-2	-4	-5	-2	2	1
1	0.30404	0	4	0	2	-2	-1	3	-3	-3	-4	-4	-1	-1	-5	1	-1	-1	-5	-3	-3	1	0	0	0	1	0.113	-0.837	1.477	1.357	-1.453	0.26654	0	0	-1	4	1	-2	-3	-4	2	-1	2	-3	-3	1	-4	-1	-2
1	0.36974	-3	0	-3	-3	-5	-1	-2	1	-3	-5	-5	7	-3	-6	-4	-1	-1	-6	-5	-5	0	1	0	0	1	-0.277	1.648	0.533	1.831	-0.561	0.34975	1	0	-3	-3	-4	0	-3	-5	-2	3	-2	4	-1	-4	-4	-2	-3
1	0.11475	-2	-1	-1	2	-5	1	7	-3	-1	-5	-4	-1	-3	-5	-2	-1	-2	-4	-3	-4	0	0	1	0	1	0.113	-0.837	1.477	1.357	-1.453	0.12966	-2	7	-2	-3	-4	1	-1	-3	-1	-4	-4	1	-3	-4	-3	-1	0
1	0.078698	2	-3	-5	-5	-2	-4	-5	-5	-5	3	1	-4	0	-1	-3	-4	-3	-5	-3	5	1	0	0	1	0	1.242	-1.262	-0.544	-1.337	-0.279	0.061409	1	1	-2	-3	7	0	-3	0	2	-2	-4	2	-1	-3	-1	-1	-1
1	0.68997	-2	0	-3	0	-5	-1	0	2	-4	1	1	-1	1	0	1	-3	0	-5	2	1	0	0	1	0	1	0.393	0.816	2.131	-1.239	-0.547	0.66447	-2	0	2	1	-4	1	0	0	3	-3	-1	2	-2	-2	2	-1	1
1	0.070968	1	0	-2	-1	-4	1	5	-2	-1	-3	-1	1	-2	-4	-1	-1	-1	0	-3	-1	1	0	0	0	1	0.113	-0.837	1.477	1.357	-1.453	0.075355	1	-2	2	3	-4	2	4	-1	1	-4	-5	0	-4	-6	-2	-1	-2
1	0.15457	-1	-3	-2	-3	2	-3	-3	-4	-4	-2	-2	-3	2	-4	-3	0	7	-4	-4	-1	1	0	0	1	0	0.908	1.313	2.213	-0.032	0.326	0.16707	-3	0	-2	-3	-5	-1	-1	-4	-3	-5	-5	7	-3	-5	-3	-2	-3
1	0.017145	-2	-5	-3	-5	-3	-4	-5	-5	-5	2	0	-4	-1	-3	-5	-3	-2	-5	-3	7	0	1	0	1	0	1.242	-1.262	-0.544	-1.337	-0.279	0.015423	5	-4	-4	-4	7	-4	-4	-2	-4	0	-2	-4	-1	-2	-4	-1	-2
1	0.31835	3	1	1	-3	-4	-3	-3	3	-1	-5	-5	-2	-3	-5	-4	4	-2	-5	-4	-4	0	0	1	1	0	0.67	-2.647	-4.76	-0.228	1.399	0.3283	1	-4	-4	-4	-1	3	-3	-1	-4	3	3	-3	4	-3	-4	-2	0
1	0.13331	-3	2	-2	0	-4	7	-1	-4	2	2	-3	-1	-3	-4	-4	-3	-3	-4	-3	-1	1	0	0	1	0	-0.503	-1.853	-3.005	0.931	-0.179	0.14823	-3	1	1	7	-6	-1	0	-4	-1	-6	-6	-1	-5	-6	-4	-1	-3
1	0.92938	-2	-3	0	-3	-4	-1	-2	-1	0	0	1	-3	-2	2	2	2	-1	1	4	-2	0	1	0	1	0	-0.838	1.512	3.097	0.26	0.83	0.93	0	1	2	-2	-5	0	-1	-2	0	-2	-1	4	-1	-5	0	1	-1
1	0.28825	0	0	-1	0	1	-2	-2	-3	2	0	-1	1	-3	-4	-4	3	3	-2	-1	0	0	0	1	0	1	0.67	-2.647	-4.76	-0.228	1.399	0.32341	-2	1	0	-1	-5	0	1	-3	-3	-4	-4	3	-4	-3	5	0	1
1	0.21912	-2	0	-3	1	-3	0	2	-4	-2	1	0	4	0	1	-4	-2	-3	-5	-2	0	1	0	0	0	1	-0.277	1.648	0.533	1.831	-0.561	0.23137	6	-4	-4	-4	2	-3	-4	-2	-4	-3	-3	-3	0	-3	-4	1	1
1	0.23137	6	-4	-4	-4	2	-3	-4	-2	-4	-3	-3	-3	0	-3	-4	1	1	-5	-4	-1	1	0	0	1	0	1.57	-0.146	-0.733	-0.591	-1.302	0.25174	-3	-1	-3	-5	3	0	-2	-5	-2	3	3	-1	1	-3	-5	-3	-2
1	0.080172	-2	0	3	3	-6	1	5	0	-1	-5	-3	1	-4	-6	-4	-1	-2	-4	-4	-5	1	0	0	0	1	-0.169	0.933	1.299	0.945	0.828	0.081638	-4	2	-4	-5	-5	-1	-3	-5	-4	2	1	3	8	-3	-5	-4	-3
1	0.13409	-2	-4	-2	2	-4	-4	-3	6	-4	-5	-5	-3	-5	-4	-2	-2	2	-5	-5	-5	0	0	1	0	1	1.045	2.064	1.33	-0.384	1.652	0.13244	-1	-3	1	6	-4	-1	2	-3	-2	-4	-4	-2	-4	-4	-3	1	2
1	0.11253	6	-4	-4	-4	-1	-4	-3	-2	-5	-4	-3	-3	-4	-5	-4	1	-1	-2	-5	-2	1	0	0	1	0	1.57	-0.146	-0.733	-0.591	-1.302	0.11316	-3	-5	-5	-6	2	-4	-5	-5	-5	3	3	-5	8	-1	-5	-4	0
1	0.075004	-2	6	-2	-3	-6	1	0	-4	1	-5	-5	5	-4	-5	-4	-3	-1	-5	-2	-5	1	0	0	0	1	-0.277	1.648	0.533	1.831	-0.561	0.0703	-5	-5	-5	-6	-5	-4	-5	-5	-1	-4	-3	-5	-3	4	-6	-5	-5
1	0.062731	-4	-5	-3	-5	-5	-3	-4	0	4	-3	-3	-5	-2	8	-6	-4	-4	4	1	-4	1	0	0	1	0	-1.474	-0.078	-1.673	0.336	-0.417	0.069355	-2	2	-3	-3	-5	1	1	-4	-3	-3	-1	6	2	-4	-4	-3	0
1	0.092073	6	-3	-3	0	-2	-1	-3	-1	0	-4	-4	-2	-3	-4	-3	0	-2	-4	-1	-2	1	0	0	1	0	1.57	-0.146	-0.733	-0.591	-1.302	0.10632	-1	3	-3	-4	-4	0	-3	-4	-2	3	3	1	1	-1	-4	-3	-3
1	0.066371	-1	-4	-2	3	-2	1	6	-2	0	-6	-6	-2	-5	-6	-5	-1	-3	-6	-3	-6	1	0	0	0	1	0.113	-0.837	1.477	1.357	-1.453	0.042003	2	-1	0	4	-2	1	2	0	-4	-5	-4	0	-2	-1	-3	-1	0
1	0.75418	2	-3	-2	-3	-3	-2	-2	4	-3	-4	-4	1	-3	-4	3	3	-2	-4	-4	-3	0	0	1	0	1	0.67	-2.647	-4.76	-0.228	1.399	0.70553	-1	5	1	-3	1	-1	-1	-3	-2	-4	-4	5	-3	-5	-3	-1	-2
1	0.6065	2	-1	-1	-1	-3	0	0	2	-2	-2	-2	2	-2	-3	0	1	0	-3	-3	-1	0	0	1	0	1	1.57	-0.146	-0.733	-0.591	-1.302	0.58749	-1	-2	0	1	-3	1	3	-1	-1	-2	-2	2	-2	-3	1	-1	0
1	0.20344	0	-3	-3	-3	-3	-3	-3	-2	-3	4	1	-3	-1	-1	-1	-3	-2	-4	-3	4	0	0	1	1	0	0.393	0.816	2.131	-1.239	-0.547	0.18359	-2	0	1	5	-5	0	0	-2	-2	-4	-3	0	-4	-5	-1	1	3
1	0.067405	-3	-2	3	3	-5	1	3	-4	-1	-5	-4	-3	-4	-4	-4	-1	-1	9	-3	-4	1	0	0	0	1	-2.128	-0.184	0.672	-0.595	0.009	0.078174	-1	-1	-1	3	-5	5	3	-3	-1	-5	-4	3	-3	-4	-1	0	-2
1	0.14748	-5	-1	2	7	-7	-1	1	-4	-4	-6	-6	-1	-5	-5	-5	-2	-3	-4	-5	-6	1	0	0	1	0	-0.259	-3.242	-3.656	1.05	0.302	0.14328	2	1	-1	0	-2	2	3	-2	-1	-4	-2	3	-1	-5	-5	-1	-2
1	0.17078	-2	0	-1	0	0	0	-1	-2	5	-1	0	-2	1	2	-2	-1	0	4	2	-2	1	0	0	1	0	-0.838	1.512	3.097	0.26	0.83	0.14312	1	1	0	3	-2	0	2	-2	2	-1	-2	0	0	-2	-1	0	-1
1	0.14017	6	-3	-3	-3	-3	-3	-2	-2	-4	-3	-3	-1	-1	-4	-3	1	0	-5	-4	-2	1	0	0	1	0	1.57	-0.146	-0.733	-0.591	-1.302	0.14781	-2	-4	-2	-5	-3	-4	-4	-1	-5	6	1	-4	1	-1	-4	-3	2
1	0.27187	-1	4	0	-3	-4	-1	-2	-3	-1	-4	-3	5	-2	-5	-3	2	0	-5	-4	-3	0	1	0	0	1	-0.277	1.648	0.533	1.831	-0.561	0.21914	-2	-4	0	-3	-4	-4	-4	7	-4	-5	-4	-3	-4	-5	-4	-2	-3
1	0.41048	1	2	-1	-4	-1	-3	-4	-1	-4	1	0	-2	-3	1	-1	3	2	-5	-3	1	1	0	0	1	0	0.67	-2.647	-4.76	-0.228	1.399	0.41329	0	-2	-4	-5	0	-2	-4	0	-4	3	3	-4	-1	-1	-2	1	-3
1	0.14223	0	2	0	2	-3	2	2	-1	0	-2	-3	3	-2	-2	-2	0	-1	-3	-3	-1	0	0	1	0	1	0.113	-0.837	1.477	1.357	-1.453	0.13979	-1	-2	-1	-1	1	-1	-2	-1	-2	-1	1	-2	-1	2	4	1	-1
1	0.02755	5	-5	-5	-5	4	-4	-5	-3	-5	0	0	-4	-1	-3	-5	-1	-1	-5	-3	2	1	0	0	1	0	1.57	-0.146	-0.733	-0.591	-1.302	0.031204	6	-4	-4	-5	-3	-4	-4	1	-5	-5	-5	-4	-4	-5	-4	2	-3
1	0.48729	-3	-4	-4	-5	-4	-3	-4	-5	-4	-1	0	-4	10	-2	-5	-4	-3	-4	-3	-1	0	0	1	0	1	-1.005	1.212	2.219	-0.663	-1.524	0.45476	3	-4	-4	-3	-3	-4	-3	-4	-2	5	-1	-4	-2	-2	-1	-1	0
1	0.29092	2	-4	-4	-5	2	-4	-3	-4	-2	3	3	-2	-2	0	-4	-3	2	-4	0	2	0	1	0	1	0	1.57	-0.146	-0.733	-0.591	-1.302	0.21309	0	1	1	3	-4	4	-1	-3	-1	-5	-4	0	-3	-4	-4	2	-1
1	0.14253	-1	-1	-2	5	-2	-2	2	1	2	-4	-4	-1	-5	-4	1	-1	0	1	-2	-2	1	0	0	0	1	-0.169	0.933	1.299	0.945	0.828	0.13023	0	2	0	-3	2	0	1	-2	7	-2	-1	0	-3	-4	-5	-2	-1
1	0.6101	0	-3	1	5	-4	-2	2	-1	-3	0	-1	-2	-3	-4	-3	0	-2	-5	-4	1	0	0	1	0	1	-0.259	-3.242	-3.656	1.05	0.302	0.58942	-1	0	0	4	-5	1	5	-4	-3	-4	-4	-2	-4	0	-3	-1	1
1	0.49085	-1	4	-3	-2	-1	0	-1	-4	4	-2	-1	1	-3	-2	2	-1	2	-5	-4	-1	0	1	0	0	1	-0.503	-1.853	-3.005	0.931	-0.179	0.42297	-4	-4	-3	-4	-4	-3	-4	-2	0	1	2	-4	-1	4	-4	-4	-2
1	0.14438	0	-3	-2	-2	-3	-3	-3	-4	-1	-2	1	-4	1	1	3	-2	-1	8	3	-2	0	0	1	1	0	1.266	-0.912	-1.505	-1.019	-0.987	0.15086	-2	-3	-4	0	-4	-4	-2	-4	-4	0	5	-4	4	-1	-3	-3	-1
1	0.078674	1	4	0	-1	1	0	0	-3	1	-2	-3	2	-3	-4	-4	1	1	-2	-2	-3	1	0	0	0	1	0.44	2.897	1.502	1.538	-0.055	0.067788	-4	-5	-6	-6	-2	-5	-5	-6	-5	0	6	-5	1	0	-5	-5	-4
1	0.69691	-1	-2	2	1	-3	1	2	-2	-2	-2	-3	0	2	-3	-1	2	3	0	-3	-2	0	0	1	0	1	0.67	-2.647	-4.76	-0.228	1.399	0.68105	1	-2	0	-2	-3	2	2	0	2	-2	-2	1	-3	0	0	0	1
1	0.32319	-1	-3	-1	-2	-3	-2	-2	-2	-3	-4	-4	-2	-3	-4	-3	7	0	-5	-4	-3	0	0	1	1	0	0.67	-2.647	-4.76	-0.228	1.399	0.36321	-2	-4	-1	-3	-4	-3	-3	7	-4	-5	-5	-2	-4	-5	-4	-1	-2
1	0	0	0	0	0	0	0	0	0	0	0	0	0	0	0	0	0	0	0	0	0	0	0	0	0	0	0	0	0	0	0	0	0	0	0	0	0	0	0	0	0	0	0	0	0	0	0	0	0
1	0.34684	-2	-1	-1	0	-5	1	7	-3	-1	-5	-4	0	-3	-5	-2	-1	-1	-4	-3	-4	1	0	0	0	1	0.113	-0.837	1.477	1.357	-1.453	0.35113	-3	-4	-5	-4	-2	-4	-5	-5	-5	7	0	-4	0	-1	-4	-4	-2
1	0.474	-1	-4	-4	-4	-2	-3	-3	-5	-4	3	0	-4	0	-2	-3	-3	-1	-4	-2	6	0	1	0	0	1	1.242	-1.262	-0.544	-1.337	-0.279	0.48052	-2	-4	-5	-4	-2	-4	-5	-5	-5	7	0	-4	0	-1	-4	-4	-2
1	0.41763	-3	-4	-4	-5	-4	-4	-4	-4	-2	-1	-1	-4	0	8	-5	-3	-3	0	2	-2	0	0	1	1	0	-0.397	0.412	1.891	-1.006	-0.59	0.39155	-2	0	0	-1	-4	7	1	-3	1	-4	-3	1	-2	-4	-2	-1	-2
1	0.47127	-2	-1	-1	1	-5	1	6	-3	-1	-4	-4	0	-3	-4	-2	-1	-2	-4	-3	-4	1	0	0	0	1	0.113	-0.837	1.477	1.357	-1.453	0.47375	2	-2	-1	-2	1	-1	-2	-1	-2	-2	-3	-2	-2	-2	-2	5	0
1	0.072281	-3	-2	-1	-3	-5	-2	-2	-4	10	-5	-4	-3	-3	-3	-4	-3	-2	-4	0	-5	0	1	0	1	0	-1.474	-0.078	-1.673	0.336	-0.417	0.069891	-3	-4	-4	-4	5	-3	-3	-4	-4	-4	-3	-3	-2	-5	8	-3	-2
1	0.29248	-2	-4	2	3	-5	-3	2	4	-3	-4	-2	-1	-4	0	-4	-1	-1	-5	0	-2	1	0	0	0	1	-0.259	-3.242	-3.656	1.05	0.302	0.28962	0	0	0	1	-4	-1	0	-1	-3	-1	-3	2	-2	-4	-2	3	0
1	0.39028	0	-2	-4	-3	-4	-3	-3	-3	-4	1	1	-4	6	5	-5	-3	-3	-3	-1	1	1	0	0	0	1	0.393	0.816	2.131	-1.239	-0.547	0.35765	-3	6	-1	-1	-3	-1	1	1	-3	-5	-4	2	-4	-5	-4	1	-1
1	0.16818	-1	3	0	0	1	-1	0	0	-1	-2	-3	4	-2	-2	-2	1	0	-5	-1	-4	0	1	0	0	1	0.44	2.897	1.502	1.538	-0.055	0.13725	1	1	1	-1	0	0	1	-1	0	0	-2	2	-1	-3	-2	1	-1
1	0.79448	1	0	0	-1	-3	3	-1	0	-1	-2	-1	0	0	-1	0	0	0	-3	0	-1	0	0	1	0	1	-0.503	-1.853	-3.005	0.931	-0.179	0.80842	-1	0	-2	0	-4	-1	-2	1	-1	0	1	-2	0	1	3	-1	0
1	0.41958	-3	-4	-2	-4	-4	-3	1	-5	-3	-1	4	-4	0	2	1	-4	-3	-2	5	-2	0	1	0	1	0	1.266	-0.912	-1.505	-1.019	-0.987	0.41831	2	-3	-4	-4	-3	-2	-2	-4	-4	2	1	-3	-1	-3	-4	-2	1
1	0.34492	-1	1	1	-1	0	2	2	0	0	-1	-2	2	-4	-1	0	-1	0	-5	-1	-1	1	0	0	0	1	-0.503	-1.853	-3.005	0.931	-0.179	0.34275	-1	0	1	0	-5	1	0	-1	-4	0	-1	0	2	1	0	0	0
1	0.34275	-1	0	1	0	-5	1	0	-1	-4	0	-1	0	2	1	0	0	0	-4	1	0	1	0	0	0	1	-1.005	1.212	2.219	-0.663	-1.524	0.33841	0	1	-3	-4	4	-3	-4	0	-4	1	0	1	3	2	-4	0	1
1	0.22574	-3	-2	-3	-4	-4	6	-2	-4	-3	-1	-1	-1	8	-3	-4	-3	-2	-4	-3	-2	1	0	0	1	0	-1.005	1.212	2.219	-0.663	-1.524	0.26345	-2	-2	-3	-4	-2	3	-2	-5	-4	1	3	0	5	-3	-4	-3	-1
1	0.065493	-1	1	3	-1	-5	2	1	0	1	-5	-4	5	-3	-5	-4	0	-2	-5	-4	-4	0	0	1	0	1	-0.503	-1.853	-3.005	0.931	-0.179	0.067585	-2	-3	-3	-2	-4	0	3	-5	-3	4	-1	-3	0	-3	0	-3	-1
1	0.18923	0	-3	0	6	-5	0	2	1	-3	-5	-5	0	-1	-5	-3	0	-2	-5	-2	-4	0	1	0	0	1	-0.259	-3.242	-3.656	1.05	0.302	0.18246	-2	-3	-3	-4	-4	-3	-4	-2	7	-1	-1	-4	-2	5	-4	-1	-2
1	0.40529	0	-4	-3	-3	-4	-3	-3	-4	-4	-1	-4	-3	-3	-5	7	-1	2	-5	-4	-2	0	0	1	1	0	0.421	-1.392	-1.628	0.189	2.081	0.38989	0	1	2	-2	-3	-2	-2	-1	1	-4	-2	-1	-2	-4	-3	5	0
1	0.3822	-3	1	-2	-3	-5	1	0	-4	-3	-5	-5	7	-4	-5	-3	-2	-3	-5	-4	-5	0	1	0	0	1	-0.277	1.648	0.533	1.831	-0.561	0.34617	-4	-5	-6	-6	-4	-5	-5	-6	-5	2	5	-5	-1	2	-4	-5	-3
1	0.40111	-1	-3	0	4	-5	-2	1	-4	-4	-4	-4	-3	-4	-2	5	1	0	-6	-3	-3	0	0	1	0	1	-0.259	-3.242	-3.656	1.05	0.302	0.39967	-3	-5	-6	-6	-4	-5	-5	-6	-6	6	2	-5	0	-2	-5	-5	-1
1	0.025237	-2	6	0	0	-4	3	0	-1	2	-3	-5	1	-3	-5	-2	-2	-3	-5	-3	-4	1	0	0	0	1	0.44	2.897	1.502	1.538	-0.055	0.022838	2	-4	0	0	-4	-1	-3	-3	2	0	-2	-4	-1	-1	-4	-3	-2
1	0.48975	-1	4	-3	-4	1	0	-3	-4	-1	-1	3	1	0	-3	1	-2	-1	-4	-2	-2	0	0	1	1	0	1.266	-0.912	-1.505	-1.019	-0.987	0.43962	2	-4	-2	-3	-2	-3	-3	6	-4	-4	-4	-3	-1	-4	-3	0	-2
1	0.47056	-2	-4	-3	-4	-3	-4	-3	-4	-4	4	0	-4	-1	-2	-4	-3	-2	-4	-3	5	0	1	0	1	0	1.242	-1.262	-0.544	-1.337	-0.279	0.49575	-3	-4	-3	-4	-3	-3	-4	-5	-4	3	5	-4	2	-1	-4	-3	-2
1	0.13082	-2	1	1	-1	-5	2	1	-1	-2	-3	-3	6	-2	-5	-3	-2	-1	-5	-4	-2	0	0	1	0	1	-0.277	1.648	0.533	1.831	-0.561	0.10536	5	-4	-3	-4	2	-3	-3	1	-4	-1	-2	-3	-3	-4	-1	1	-1
1	0.73179	3	-3	-2	1	-5	0	4	-1	-1	-3	-4	1	-3	-5	-3	-1	-1	-6	-5	0	1	0	0	0	1	0.113	-0.837	1.477	1.357	-1.453	0.69474	3	3	1	-1	-5	-1	0	-4	-2	-3	-4	5	-2	-4	-4	-1	-3
1	0.6319	2	1	-2	-2	-5	2	5	-2	-2	-5	-5	4	-4	-5	-4	-2	-4	-6	-5	-4	1	0	0	0	1	-0.277	1.648	0.533	1.831	-0.561	0.60908	1	2	-1	0	-5	1	1	-2	-1	-3	-4	5	-3	-5	-4	-1	0
1	0.2944	-2	-4	-2	-1	-4	-3	-1	5	-4	-5	-5	-3	-1	-5	3	1	2	-5	-5	-4	0	0	1	0	1	1.045	2.064	1.33	-0.384	1.652	0.291	0	-4	-4	-5	0	-1	-4	-5	-4	2	0	-4	1	-1	-4	-3	3
1	0.2817	1	-1	2	0	-4	1	-2	-2	-3	-2	-4	1	-3	-4	0	3	-1	1	-4	1	0	0	1	1	0	0.67	-2.647	-4.76	-0.228	1.399	0.25839	-3	-1	-2	-3	-4	-2	-2	-4	10	0	-3	-3	4	-3	-4	-3	0
1	0.25839	-3	-1	-2	-3	-4	-2	-2	-4	10	0	-3	-3	4	-3	-4	-3	0	-4	-1	-4	0	0	1	1	0	-1.474	-0.078	-1.673	0.336	-0.417	0.27539	-2	-2	-2	-3	-4	2	0	-4	1	-3	-2	2	-2	7	-2	-2	-3
1	0.29146	-3	-1	-2	-1	-4	3	-2	-1	8	-3	-2	-1	-1	2	-4	-3	-1	-3	2	-2	0	0	1	1	0	-1.474	-0.078	-1.673	0.336	-0.417	0.30159	-3	-3	-3	-4	2	0	-3	-4	2	-3	-3	1	-3	0	-4	-3	-2
1	0.15493	-3	1	-2	-3	-5	-1	-1	-4	-3	-5	-5	7	-3	-5	-3	-2	-1	-5	-4	-4	0	0	1	1	0	-0.277	1.648	0.533	1.831	-0.561	0.14698	-3	-4	-4	-4	-5	-3	-3	-4	-4	-5	-5	-3	-5	-6	9	-3	-3
1	0.090236	-3	-4	-1	-5	-3	-4	-4	-5	-4	6	2	-4	1	2	-4	-4	-3	-4	-3	3	0	0	1	1	0	0.393	0.816	2.131	-1.239	-0.547	0.11799	-2	-1	-4	-5	-4	-4	-4	-5	0	0	1	-3	-1	8	-5	-4	-3
1	0.22698	-2	-3	2	0	-2	-3	-3	4	-4	-4	-5	-1	-4	-5	-4	1	5	-5	-4	-4	0	0	1	0	1	1.045	2.064	1.33	-0.384	1.652	0.22338	-2	0	4	2	-4	-2	0	-1	-1	-2	1	1	-1	-2	-3	0	1
1	0.73958	-1	0	0	0	-5	1	0	-1	2	0	-1	0	2	1	0	-1	0	4	1	-1	0	0	1	1	0	-0.838	1.512	3.097	0.26	0.83	0.73798	0	-3	1	1	-4	1	0	0	3	-4	-1	0	-3	1	1	0	0
1	0.55645	-2	5	-1	-1	-5	1	4	-3	-1	-4	-3	1	-3	-4	-3	-1	-2	-4	-3	-3	0	0	1	0	1	0.44	2.897	1.502	1.538	-0.055	0.53192	-2	6	-1	-3	-4	0	-1	-3	3	-3	-1	1	-2	-3	-3	-2	-2
1	0.1135	-4	-2	-2	-3	-5	-2	-2	-4	10	-5	-5	-3	-4	-3	-4	-3	-2	-4	0	-5	0	1	0	1	0	-1.474	-0.078	-1.673	0.336	-0.417	0.11671	-3	-3	-4	-4	6	-3	-3	-4	-4	-4	-3	-3	-3	-5	8	-3	-2
1	0.1343	-3	-2	8	0	-4	-1	-1	-2	-1	-5	-5	-1	-3	-4	-3	-1	-1	-5	-3	-4	1	0	0	0	1	-0.169	0.933	1.299	0.945	0.828	0.12635	-2	-3	-3	-4	-3	-2	-3	-4	-3	0	1	-3	9	-1	-4	-3	-2
1	0.2371	-1	0	-1	-1	-4	7	0	-2	1	-4	-4	1	-2	-4	-2	0	-1	-4	-3	-4	1	0	0	0	1	-0.503	-1.853	-3.005	0.931	-0.179	0.20871	-3	-3	2	-4	-3	-3	-4	-4	-2	0	5	-4	2	1	-2	-3	-3
1	0.13343	-2	-5	-4	-5	11	-4	-5	-4	-4	-3	-3	-5	-3	-4	-4	-2	-2	-4	-4	-2	0	0	1	1	0	-1.02	-0.255	-0.862	-1.343	0.465	0.12839	-3	-3	1	7	-5	-2	0	-3	-2	-5	-5	-2	-5	-5	-3	-2	-2
1	0.12839	-3	-3	1	7	-5	-2	0	-3	-2	-5	-5	-2	-5	-5	-3	-2	-2	-6	-5	-5	0	0	1	1	0	-0.259	-3.242	-3.656	1.05	0.302	0.10359	-2	-4	-3	-3	-4	-3	-3	-4	-4	-4	-4	-2	-4	-5	8	-2	-3
1	0.069421	0	-2	0	-2	-1	-2	-2	-2	-3	-2	-3	-2	-2	-4	-2	2	6	-4	-3	-2	0	0	1	0	1	0.908	1.313	2.213	-0.032	0.326	0.056618	-2	2	-1	-2	-5	1	0	-3	-2	-4	-4	7	-2	-5	-3	-2	-2
1	0.16665	-1	-3	-2	-3	-4	-3	-2	6	-3	-5	-5	-3	-4	-5	-3	0	-2	-4	-4	-4	0	0	1	1	0	1.045	2.064	1.33	-0.384	1.652	0.15608	-3	-3	0	7	-5	-1	1	-2	-3	-5	-5	-2	-5	-5	-3	-2	-3
1	0.062593	2	1	-1	-2	0	-1	2	-2	0	-1	-3	0	0	0	-4	0	1	4	0	0	0	0	1	0	1	-1.005	1.212	2.219	-0.663	-1.524	0.053664	-4	-1	-4	-5	-4	-4	-4	-4	-1	-2	-2	-4	-3	7	-5	-3	-3
1	0.051759	4	-4	-4	-4	3	-1	-2	0	-4	-3	-3	-3	-2	3	2	-1	0	-2	0	0	0	0	1	1	0	1.57	-0.146	-0.733	-0.591	-1.302	0.066683	-4	-4	-1	8	2	-3	-1	-2	2	-5	-5	-3	-5	-5	-4	-2	-3
1	0.034126	-3	-3	-3	-5	-2	-3	-5	-5	-2	1	3	-2	1	1	-3	-4	0	5	0	3	0	1	0	1	0	1.266	-0.912	-1.505	-1.019	-0.987	0.037986	1	-3	2	-3	4	-3	-3	-3	-3	2	1	-3	4	-3	-3	-2	2
1	0.13612	4	-3	-3	-4	0	-1	-3	-2	-2	-2	-2	-3	0	1	1	2	-1	-4	4	-1	0	0	1	1	0	1.57	-0.146	-0.733	-0.591	-1.302	0.1672	-2	4	-3	-3	-3	2	-1	-2	2	-2	-1	4	0	-4	0	-1	-2
1	0	0	0	0	0	0	0	0	0	0	0	0	0	0	0	0	0	0	0	0	0	0	0	0	0	0	0	0	0	0	0	0	0	0	0	0	0	0	0	0	0	0	0	0	0	0	0	0	0
1	0.90253	-3	3	-1	-1	-4	2	-2	-1	-3	-1	-4	4	-3	-4	0	1	1	-5	-4	-3	1	0	0	0	1	-0.277	1.648	0.533	1.831	-0.561	0.90578	1	-3	0	-1	-3	-3	-3	-4	-4	-2	3	-3	-2	-3	0	1	4
1	0.56884	-1	4	0	-1	-1	1	1	-4	-2	-4	-3	4	-1	-4	-4	1	-1	-6	-3	-2	1	0	0	0	1	0.67	-2.647	-4.76	-0.228	1.399	0.61159	-4	-4	4	6	-6	-2	1	-4	3	-5	-6	-2	-2	-4	-4	-2	-2
1	0.48889	-2	2	-2	0	-1	5	4	-5	3	-4	-5	3	-2	-5	-4	-2	-3	-3	-2	-3	1	0	0	0	1	-0.503	-1.853	-3.005	0.931	-0.179	0.47071	2	3	-1	-2	3	4	1	-3	0	-2	-3	1	-3	-5	-4	1	-2
1	0.97617	-2	-3	1	-2	-3	-2	-2	3	3	-3	-3	-2	1	-4	-3	-1	5	-4	-3	-2	0	0	1	0	1	0.908	1.313	2.213	-0.032	0.326	0.97473	-3	7	-2	-3	-5	-1	-2	0	-2	-4	-4	1	-3	-4	1	-2	-3
1	0.9912	4	-2	-2	-2	-2	-2	1	-2	-2	-1	-2	-2	-2	1	2	-1	-1	-3	-2	2	1	0	0	0	1	1.57	-0.146	-0.733	-0.591	-1.302	0.99129	-2	-2	0	-1	-4	2	5	-3	-2	-2	0	-1	2	-3	0	-2	-2
1	0.53357	0	-2	1	-2	2	1	-1	-2	3	-2	-1	-1	-1	4	-3	-1	0	1	1	-1	1	0	0	1	0	-1.02	-0.255	-0.862	-1.343	0.465	0.56743	-1	1	0	0	-1	0	0	-1	-3	-1	-2	2	-3	-4	4	0	3
1	0.091363	-1	-4	-4	-4	-1	-4	-1	-4	-4	2	0	-4	0	-3	-4	-2	-1	-4	-3	6	0	1	0	1	0	1.242	-1.262	-0.544	-1.337	-0.279	0.080886	0	-4	-4	-5	0	-4	-4	-3	-4	1	3	-4	2	-2	-1	-2	-1
1	0.02147	-2	6	1	-3	-4	1	-1	-4	0	-4	-3	3	1	-4	-3	-2	-3	3	-3	-3	1	0	0	0	1	0.44	2.897	1.502	1.538	-0.055	0.020404	-1	-2	-6	-5	-4	-5	-5	-5	-1	-2	1	-3	0	3	-6	-4	-4
1	0.89147	1	-2	-1	-2	-2	-2	-2	-2	-3	-1	0	-2	-1	-3	-2	0	6	-4	-3	-1	0	0	1	0	1	0.908	1.313	2.213	-0.032	0.326	0.89282	-3	-4	-4	-4	6	-4	-4	-4	-3	-2	2	-4	-1	6	-4	1	-2
1	0.019075	-3	-1	-4	-5	11	-5	-5	-3	-1	-4	-4	-5	-4	-4	-5	-2	-3	-4	-2	-3	0	0	1	1	0	-1.02	-0.255	-0.862	-1.343	0.465	0.025482	-2	-1	0	1	-2	-1	-1	4	1	-5	-2	1	-2	0	-1	1	-1
1	0.065883	-4	-5	-2	-3	-3	-4	-5	-6	0	1	-3	-1	-3	5	-1	-2	-4	2	7	-1	0	1	0	1	0	-0.838	1.512	3.097	0.26	0.83	0.060613	-3	-3	-3	-4	-2	-4	-5	-3	5	0	-1	-4	-3	3	-2	-2	-2
1	0.055111	-2	-2	3	-2	0	-3	0	5	-1	-6	-4	-2	-2	-5	2	1	-3	-5	-2	-5	0	0	1	0	1	1.045	2.064	1.33	-0.384	1.652	0.051542	-1	1	1	0	-3	1	2	-2	3	0	-2	1	-2	-3	-3	2	1
1	0.47444	-2	-1	-1	-2	-4	-1	-1	-3	0	0	0	1	2	0	-4	-2	-2	9	0	-1	1	0	0	1	0	-2.128	-0.184	0.672	-0.595	0.009	0.45761	-2	0	0	1	-5	2	2	-2	1	1	-1	1	0	-1	-4	0	0
1	0.59862	-1	1	2	0	1	2	1	-2	1	-1	-2	0	-4	-5	0	1	0	-5	0	-1	1	0	0	0	1	-0.169	0.933	1.299	0.945	0.828	0.56993	-1	0	1	0	3	-3	0	-1	2	0	-1	0	2	-4	0	0	0
1	0.14074	-2	-5	-4	-5	-2	-4	-5	-5	-3	3	3	-4	0	-2	-5	-2	4	1	0	3	1	0	0	1	0	0.908	1.313	2.213	-0.032	0.326	0.13852	-3	-5	-5	-6	-2	-2	-5	-6	-5	3	4	-4	1	2	-5	-5	-3
1	0.34902	4	-4	-1	-1	-1	-2	-1	-3	1	0	0	-1	-2	-2	-1	-1	1	-5	-2	1	1	0	0	1	0	1.57	-0.146	-0.733	-0.591	-1.302	0.41207	-4	-1	0	-1	-5	-3	-2	-5	10	-3	-3	-4	-4	-2	-2	-2	-2
1	0.50956	-2	-2	2	-2	3	-2	-2	-3	-1	-2	-2	0	-2	3	-3	-2	-2	0	6	-2	0	1	0	1	0	-0.838	1.512	3.097	0.26	0.83	0.48598	-2	-2	3	5	-3	-1	3	-2	-2	-3	-3	-1	-3	-3	-2	-1	-2
1	0.026815	0	-3	2	5	-4	-1	0	3	-1	-5	-5	-2	-4	-5	-4	1	-2	-5	-4	-4	0	0	1	1	0	1.045	2.064	1.33	-0.384	1.652	0.028201	0	1	2	1	-2	0	-2	-2	1	-4	-4	2	-4	-5	-4	4	2
1	0.57068	0	-1	1	4	-2	0	1	-1	1	-2	-1	0	-2	-2	-1	1	-1	-2	-1	-1	0	0	1	0	1	-0.259	-3.242	-3.656	1.05	0.302	0.5928	1	-1	-1	-1	-2	0	0	3	-1	-2	-1	0	-1	-2	-1	1	0
1	0.85137	-1	2	-2	-3	-4	1	1	-3	-1	-2	-3	5	0	-4	-1	0	0	-4	-3	0	0	0	1	0	1	-0.277	1.648	0.533	1.831	-0.561	0.84779	0	-2	1	0	-3	5	2	-2	-2	-4	-4	-1	-3	-5	1	2	0
1	0.30644	0	1	1	1	-6	2	3	-3	1	-2	-4	4	-3	-6	-4	-1	1	-4	-4	-3	1	0	0	0	1	-0.277	1.648	0.533	1.831	-0.561	0.31977	-1	1	0	0	-6	2	5	-3	0	-4	-4	3	-3	-2	-4	0	-3
1	0.31043	-3	-4	3	7	0	-1	-1	-4	-3	-4	-6	-2	-5	-6	-3	-1	-3	-7	-6	-2	0	0	1	0	1	-0.259	-3.242	-3.656	1.05	0.302	0.2858	-2	0	-2	-4	-5	-2	-2	-4	-1	-1	-3	-1	-3	-4	7	0	-2
1	0.37522	-5	-6	-2	-6	-5	-6	-6	-6	-3	-2	0	-6	0	8	-6	-5	-5	0	1	-1	0	0	1	1	0	-0.397	0.412	1.891	-1.006	-0.59	0.36308	-3	-4	-5	-6	-4	-4	-5	-6	-5	4	3	-3	7	-2	-6	-3	-4
1	0.29632	-1	-5	-3	-6	-4	-5	-5	-3	-5	3	3	-3	2	5	-4	-2	-1	-4	-2	1	0	0	1	1	0	-0.397	0.412	1.891	-1.006	-0.59	0.2467	1	-3	-2	-4	-4	-3	-4	1	-3	0	-2	-4	-1	-3	-3	0	5
1	0.026712	3	-4	-1	-3	-3	-3	-3	-2	-4	-2	-2	-3	-3	-5	1	1	5	-5	-4	0	1	0	0	1	0	1.57	-0.146	-0.733	-0.591	-1.302	0.027955	-2	-1	-1	-4	-4	-3	-1	-5	-4	-1	0	-2	5	-2	-4	2	2
1	0.38443	-4	-5	-6	-6	-4	-3	-5	-6	-5	0	6	-4	4	-1	-5	-4	-4	-1	-3	-1	1	0	0	1	0	1.266	-0.912	-1.505	-1.019	-0.987	0.38193	-4	3	-2	1	-6	1	2	-4	4	-3	-5	5	-4	-4	-4	-2	-2
1	0.47482	-1	2	-1	0	-4	2	0	4	-2	-4	-4	3	-2	-4	-2	-1	-2	-3	-3	-3	1	0	0	0	1	-0.277	1.648	0.533	1.831	-0.561	0.48385	-1	-3	-3	-4	7	-3	-3	-3	-3	-1	1	-3	-1	4	-4	1	-2
1	0.077666	-3	-2	-3	0	-6	0	6	-5	-1	-4	-4	2	-4	-3	-5	-2	-2	6	1	-2	0	1	0	0	1	-0.277	1.648	0.533	1.831	-0.561	0.05537	-4	-4	-6	-6	-4	-4	-6	-6	-5	4	3	-5	1	4	-4	-5	-4
1	0.018771	-3	-2	-3	-2	-2	-4	-3	-6	3	4	-1	0	1	-3	-5	-3	2	-5	1	4	0	1	0	1	0	0.393	0.816	2.131	-1.239	-0.547	0.016832	0	-3	0	-3	-2	2	1	-5	0	0	2	-4	3	-4	-5	-3	0
1	0.32817	-2	6	-2	-5	-5	0	-4	-4	0	2	-3	-1	0	-2	-5	-4	-2	2	-4	0	1	0	0	1	0	0.44	2.897	1.502	1.538	-0.055	0.33967	-1	-1	0	0	-6	3	1	-3	-1	-5	-3	5	-2	-6	0	-2	-1
1	0.033658	-2	-4	-6	-6	-4	-4	-5	-6	-5	0	6	-5	0	-2	-5	-4	-3	-4	-3	-1	0	0	1	1	0	1.266	-0.912	-1.505	-1.019	-0.987	0.034285	2	-3	-2	-3	-3	-2	-2	-2	-3	-5	-5	-3	-4	-5	-3	6	-1
1	0.12413	-1	-2	5	-2	-4	-2	-2	-3	-2	-4	-5	1	-4	-5	4	3	-1	-5	-4	-3	0	0	1	0	1	-0.169	0.933	1.299	0.945	0.828	0.12255	-4	-3	-4	-4	-2	2	-3	-5	3	-3	1	0	-2	0	-5	-3	-3
1	0.15903	1	0	-3	-2	0	-1	-1	1	-1	0	0	-1	-1	-1	-3	0	1	-4	-2	2	0	0	1	0	1	1.242	-1.262	-0.544	-1.337	-0.279	0.18854	-2	0	0	-1	3	-1	5	-3	0	-2	-3	-1	2	-4	1	0	-2
1	0.97103	0	2	-1	1	-3	-1	-1	-2	-2	-3	-3	4	-2	-3	3	-1	0	-3	1	-2	1	0	0	0	1	1.57	-0.146	-0.733	-0.591	-1.302	0.96536	1	1	-2	-2	-3	1	0	2	1	-3	-3	-1	-2	1	-3	2	1
1	0.53061	-1	-2	-3	-3	-4	6	3	-2	3	-3	0	-2	2	-4	-4	0	-2	-4	-3	-1	1	0	0	1	0	0.113	-0.837	1.477	1.357	-1.453	0.51393	-2	6	-3	-4	-5	0	-1	-2	-3	-4	1	2	-1	-1	-4	-1	-1
1	0.12671	-1	4	0	-2	-2	1	0	-3	0	-3	-4	3	-1	-2	0	0	1	-5	0	-3	0	1	0	0	1	-0.169	0.933	1.299	0.945	0.828	0.13447	2	-4	-5	-4	1	-5	-4	-4	-5	1	0	-4	-2	3	-2	-3	-1
1	0.46038	3	-3	-2	-2	-2	-2	-2	4	-3	-4	-4	-2	-3	-4	-3	2	-1	-4	-4	-3	0	0	1	0	1	1.045	2.064	1.33	-0.384	1.652	0.40082	-3	-3	2	7	-5	-2	1	-3	-3	-4	-1	-2	-4	-5	-3	-2	-2
1	0.024885	-1	0	-2	-2	-4	4	4	-3	0	-4	-5	2	2	-6	-4	2	0	-3	-3	-5	0	0	1	0	1	-0.503	-1.853	-3.005	0.931	-0.179	0.022752	-4	-2	-5	-6	-3	-4	-5	-6	-2	0	5	0	1	2	-6	-5	-2
1	0.2301	0	-1	-4	-1	1	-4	-2	-1	2	2	-1	0	2	0	2	0	0	2	0	1	0	0	1	1	0	1.242	-1.262	-0.544	-1.337	-0.279	0.28627	-1	0	1	0	-5	0	1	-2	1	-4	-4	2	-4	0	-1	1	3
1	0.48171	-3	3	-1	-1	-5	0	-1	-1	3	-1	0	0	2	0	0	-1	-1	-1	2	0	1	0	0	1	0	-0.397	0.412	1.891	-1.006	-0.59	0.5125	0	0	0	-3	-5	2	2	2	2	-1	-2	1	0	-5	0	1	-1
1	0.71644	-1	-2	1	-2	-4	0	0	-3	-1	3	0	-1	0	-2	-1	-1	1	-5	-3	3	0	0	1	1	0	1.242	-1.262	-0.544	-1.337	-0.279	0.68852	-1	-2	-2	-3	-4	-2	-1	-3	-1	0	0	-1	0	0	-1	-2	-2
1	0.29312	0	-1	2	1	-4	-3	-1	0	0	-4	-4	-1	-4	-2	0	3	3	-5	-1	-2	0	0	1	0	1	0.908	1.313	2.213	-0.032	0.326	0.30732	-3	-3	5	6	-5	-3	-1	-2	-1	-5	-5	-2	-5	-4	-1	1	-1
1	0.39228	-2	4	-1	1	-3	1	-1	2	0	-5	-3	3	-3	-2	-4	-1	-2	-5	-4	-2	0	0	1	0	1	-0.277	1.648	0.533	1.831	-0.561	0.46323	-2	2	1	3	-5	1	3	-4	-2	-1	-4	3	-4	-5	-2	-2	-2
1	0.9822	1	-3	0	2	-4	-1	5	-3	-3	-4	-4	-2	-3	-4	-3	1	-1	-4	0	0	1	0	0	0	1	0.113	-0.837	1.477	1.357	-1.453	0.98233	0	-2	-1	0	-4	1	1	2	-3	0	-4	3	0	-4	0	0	0
1	0.31725	-1	-2	2	3	-5	1	0	2	-2	-3	-5	-1	-2	0	3	-2	1	-5	1	-4	0	0	1	0	1	-0.169	0.933	1.299	0.945	0.828	0.26807	-1	2	2	-2	-4	-1	0	-1	-2	-4	-4	0	-4	-5	3	4	0
1	0.98923	0	0	-1	4	1	-1	3	0	-2	-1	-1	-2	-2	-3	0	-1	-2	4	-2	-2	0	0	1	0	1	0.113	-0.837	1.477	1.357	-1.453	0.98928	-2	0	4	-2	-3	-2	-2	2	4	-1	-2	-1	-2	-3	-3	1	0
1	0.47741	-1	3	-1	-1	-6	1	4	-5	-4	-3	-1	4	-4	-6	-5	-1	-1	-6	-5	-4	1	0	0	0	1	-0.277	1.648	0.533	1.831	-0.561	0.50628	0	-2	2	1	-4	-1	-1	-2	-1	0	2	0	-1	2	-5	-2	-2
1	0.29445	0	-1	1	2	-2	1	2	1	0	-1	-2	0	-2	-2	0	0	0	-5	-4	-1	1	0	0	1	0	1.045	2.064	1.33	-0.384	1.652	0.27868	0	-3	-3	2	-4	-2	4	-2	0	0	-2	-3	0	-5	-4	1	-1
1	0.15991	-2	-5	-3	-4	-5	-4	-4	7	-4	-6	-6	-4	-5	-5	-4	-3	-4	-5	-5	-5	0	0	1	1	0	1.045	2.064	1.33	-0.384	1.652	0.17223	-4	-2	-2	-3	-5	-2	-2	-4	10	-5	-4	-2	-3	-2	-4	-3	-4
1	0.11033	-3	2	3	1	1	2	-1	-2	3	-3	-3	3	-2	-2	0	-2	-2	-4	-1	-4	0	0	1	0	1	0.44	2.897	1.502	1.538	-0.055	0.10935	-1	-4	2	2	-4	0	-1	6	-3	-5	-5	-3	-4	-5	-2	-1	-1
1	0.63564	-2	8	-1	-4	-6	-1	-2	-5	-1	-5	-4	1	0	-5	-4	-3	-3	-5	-4	-5	0	0	1	0	1	0.44	2.897	1.502	1.538	-0.055	0.65198	-2	-1	3	-3	-5	-3	-2	6	-3	-6	-6	-1	-5	-5	-4	-2	-3
1	0.61004	-3	4	3	-2	-3	6	0	-3	-1	-4	-4	1	-4	-6	-5	0	-2	-6	-1	-5	1	0	0	0	1	-0.169	0.933	1.299	0.945	0.828	0.61876	0	1	2	0	-4	1	1	-2	-1	-2	-2	3	-2	-6	-5	1	0
1	0.36869	-1	-2	-1	0	-3	-1	-2	-1	1	1	-1	1	0	-4	-2	3	3	-5	-1	-1	0	1	0	0	1	0.393	0.816	2.131	-1.239	-0.547	0.36216	-2	-2	-3	0	-3	-1	-4	7	-3	-6	-6	-4	-5	-6	-5	-1	-3
1	0.03792	-2	-6	-5	-6	-4	-5	-6	-6	-6	5	0	-5	3	1	-6	-5	-3	-5	-3	5	0	1	0	1	0	0.393	0.816	2.131	-1.239	-0.547	0.036348	-4	-6	-6	-6	-4	-6	-6	-7	-6	7	2	-6	0	-1	-6	-5	-3
1	0.29772	2	0	-2	2	-2	-1	3	1	-3	-4	-4	2	-3	-5	0	-1	-1	-5	-2	-2	1	0	0	0	1	-0.277	1.648	0.533	1.831	-0.561	0.24749	3	-1	-2	1	-1	-1	2	-2	-2	-2	-1	-2	-2	1	-1	-1	0
1	0.54094	4	-3	0	2	-4	0	0	-1	0	-4	-2	-1	-1	0	1	1	-2	-5	-4	-3	1	0	0	0	1	1.57	-0.146	-0.733	-0.591	-1.302	0.51921	-2	-2	-1	0	-6	0	7	-4	-2	-5	-5	-1	-4	-5	-3	-2	-3
1	0.13392	-3	2	-1	-2	-5	1	2	-4	2	-2	-2	3	-1	-3	-5	2	2	2	1	-1	0	1	0	0	1	0.67	-2.647	-4.76	-0.228	1.399	0.11707	-4	-5	-6	-7	-4	-5	-6	-7	-6	1	6	-6	-1	-1	-6	-5	-3
1	0.60821	0	0	0	0	-4	6	-1	-2	1	-3	-3	2	-2	-3	-3	-2	-1	-3	3	-3	1	0	0	1	0	1.57	-0.146	-0.733	-0.591	-1.302	0.61656	-1	1	0	1	-3	1	4	-3	0	-2	1	1	-1	-3	-3	0	-1
1	0.93934	-2	-2	1	-2	-3	-1	-1	-2	7	-2	-2	-2	-2	3	-2	-2	-1	5	1	-3	1	0	0	0	1	-1.474	-0.078	-1.673	0.336	-0.417	0.93688	-2	-1	1	4	-3	0	4	-2	-1	-3	-3	-1	-3	-3	-2	0	-1
1	0.070934	-4	-3	8	1	-5	-2	-2	-3	-2	-5	-6	-2	-4	-5	-4	0	-2	-6	-4	-5	1	0	0	1	0	-0.169	0.933	1.299	0.945	0.828	0.068144	-4	8	-3	-4	-5	-1	-2	-5	-3	-4	0	0	-3	-4	-4	-3	-3
1	0.1425	0	1	2	0	-4	3	1	-2	-1	-4	-3	4	-3	-4	-4	1	-2	-6	-3	-4	1	0	0	0	1	0.67	-2.647	-4.76	-0.228	1.399	0.12914	2	0	1	-1	0	3	1	-4	-2	-2	2	2	1	-4	-5	0	-2
1	0.057904	-4	-5	-6	-6	3	-4	-6	-6	1	-3	1	-5	-2	5	-4	-4	-4	1	8	-3	1	0	0	1	0	-0.838	1.512	3.097	0.26	0.83	0.0611	-3	1	3	2	-6	3	3	-4	-3	-5	-4	2	-3	-4	-5	0	0
1	0.2252	-3	-5	-5	-5	-4	-5	-4	-6	-5	6	1	-4	0	-2	-1	-4	-3	-5	-4	4	0	1	0	1	0	0.393	0.816	2.131	-1.239	-0.547	0.22349	1	0	-1	-2	-3	2	-1	-1	-1	0	-2	0	-1	-3	-4	2	2
1	0.41723	4	-1	-3	-4	4	-3	-3	-1	-4	1	-1	0	-3	0	-4	0	1	-4	1	0	0	1	0	1	0	1.57	-0.146	-0.733	-0.591	-1.302	0.44444	-3	4	0	0	-4	1	1	0	-3	-4	-4	-2	1	-4	-3	3	2
1	0.02939	-1	-5	-4	-6	-3	-4	-5	-5	1	0	1	-5	4	4	-6	-1	3	4	0	3	1	0	0	1	0	1.242	-1.262	-0.544	-1.337	-0.279	0.024354	0	-6	-6	-6	-1	-5	-6	-2	-4	3	4	-5	2	3	-5	-3	-4
1	0.061383	-2	-4	-5	-3	-6	-2	-4	-5	-1	-4	-5	-4	-5	-2	8	-2	-3	-6	-3	-3	0	0	1	1	0	0.421	-1.392	-1.628	0.189	2.081	0.049586	-1	-3	7	-1	-5	-2	-2	0	1	-5	-6	-2	-5	-2	-5	0	0
1	0.19251	0	1	0	1	-5	-1	2	-1	1	-3	-3	1	-2	-3	3	1	2	-5	-1	-2	0	0	1	0	1	0.113	-0.837	1.477	1.357	-1.453	0.17053	0	-2	2	1	0	0	2	2	0	-2	-3	0	-2	-2	0	0	-1
1	0.014096	-2	-4	-3	-1	-5	-5	-5	7	-5	-6	-5	-4	-4	-6	-3	-2	-3	-5	-6	-4	0	0	1	1	0	1.045	2.064	1.33	-0.384	1.652	0.010215	1	0	-2	1	-4	-1	1	-3	-3	-4	-4	1	-5	-4	6	-1	-1
1	0.21595	1	3	1	2	-5	0	0	-1	0	-5	-5	4	-5	-6	-4	2	-1	-6	-2	-5	1	0	0	0	1	-0.277	1.648	0.533	1.831	-0.561	0.19403	-1	1	1	0	-5	-2	-3	5	-2	-6	-5	0	-3	-6	1	1	0
1	0.1842	-1	2	0	-4	-3	1	0	-3	5	-4	-2	3	0	-2	-5	0	1	-3	3	-3	1	0	0	1	0	-0.277	1.648	0.533	1.831	-0.561	0.18559	-2	-5	-6	-6	-3	-5	-6	-6	-6	4	5	-5	3	-1	-6	-4	-2
1	0.093547	-1	-3	-1	-3	-1	-3	-3	-4	-4	-1	-3	-3	-3	-4	-3	-1	7	-5	-4	0	0	0	1	0	1	0.908	1.313	2.213	-0.032	0.326	0.096767	1	-2	-3	-4	-3	-2	-3	-2	-1	-3	-2	-3	-2	-5	7	0	0
1	0.034592	0	-4	1	-4	10	-4	-5	-2	-4	-4	-2	-4	-3	-5	-4	1	-1	-5	-4	-3	0	1	0	1	0	-1.02	-0.255	-0.862	-1.343	0.465	0.03858	-4	-5	-5	-6	-5	-5	-5	-5	-3	-2	-2	-5	-2	9	-6	-4	-4
1	0.59907	-1	0	2	1	1	1	1	-1	1	-1	-1	0	-1	-1	-1	0	1	-1	-1	-1	0	1	0	0	1	0.908	1.313	2.213	-0.032	0.326	0.54832	1	0	-1	-1	0	-1	0	3	0	-1	-1	0	0	-1	0	0	0
1	0.2937	1	-1	1	0	-2	0	1	-1	-1	0	-2	0	0	-3	-1	1	2	0	-2	1	1	0	0	0	1	1.57	-0.146	-0.733	-0.591	-1.302	0.2763	0	-1	-2	-1	-1	-1	-1	-1	2	-1	0	-2	-2	1	-2	0	-2
1	0.98543	4	-2	-2	-2	-1	-1	-1	0	-2	-2	-2	-1	-1	-2	-1	1	0	-3	-2	0	1	0	0	0	1	1.57	-0.146	-0.733	-0.591	-1.302	0.98394	-2	-2	-4	-4	-2	-2	-3	-4	-3	1	4	-3	2	0	-3	-3	-1
1	0.65157	-1	-1	-1	-2	3	-3	-2	-4	5	-2	3	-3	-1	-1	0	-1	-1	3	1	-1	0	0	1	1	0	1.266	-0.912	-1.505	-1.019	-0.987	0.62372	0	4	2	2	-4	0	0	-2	0	-4	-3	-1	-3	-1	-4	-2	-3
1	0.17261	-3	1	1	0	-4	1	-1	-4	8	-4	-2	0	1	-3	-2	-2	-3	-4	0	-1	0	1	0	1	0	-1.474	-0.078	-1.673	0.336	-0.417	0.19719	-2	-4	-4	-4	1	-3	-4	-4	-4	1	1	-4	2	-1	2	-1	-1
1	0.31712	-1	-2	-1	2	3	1	6	-3	-2	-4	-4	-1	-3	-5	-3	-2	-2	-5	-4	-4	1	0	0	0	1	0.113	-0.837	1.477	1.357	-1.453	0.31558	-3	-2	7	0	-4	-1	-2	-2	5	-5	-5	-2	-4	-4	-4	-1	-2
1	0.43825	-3	3	-1	-2	-5	2	3	-4	0	-4	-3	3	-4	-1	-3	1	0	-5	-4	-1	0	0	1	0	1	0.44	2.897	1.502	1.538	-0.055	0.38745	4	-4	-3	-4	-4	-4	-4	6	-1	-5	-5	-4	-4	-5	-3	-2	-3
1	0.13608	-1	-5	-6	-6	-4	-5	-6	-6	-6	0	6	-5	1	-3	-6	-4	1	-5	-4	0	1	0	0	1	0	1.266	-0.912	-1.505	-1.019	-0.987	0.13931	-2	6	-1	-3	-1	0	1	-3	-3	-4	-5	2	-1	-6	-5	0	-1
1	0.27189	-2	-4	-4	-4	-3	-4	-4	-4	-4	2	3	-4	1	-2	-4	-3	-1	-4	-3	5	0	1	0	1	0	1.242	-1.262	-0.544	-1.337	-0.279	0.27573	-2	5	-2	-3	-3	2	-2	-1	-2	-3	-1	1	-2	-3	-3	2	1
1	0.045553	-3	-2	-4	-4	-4	-3	-4	-4	1	-2	-1	-1	-2	0	-4	-3	-2	11	1	-3	0	1	0	1	0	-2.128	-0.184	0.672	-0.595	0.009	0.051726	-4	-4	-4	-5	-4	-4	-4	-4	-3	-3	-1	-1	-1	6	-4	-4	-4
1	0.21694	2	0	0	1	-4	0	1	0	-2	-5	-3	1	-4	-4	1	3	1	-6	-4	-4	0	0	1	0	1	0.908	1.313	2.213	-0.032	0.326	0.20644	0	3	-1	-1	-5	2	1	-1	0	-5	-5	4	-3	-4	-3	2	-2
1	0.19967	-1	5	-1	-3	-5	2	1	-3	1	-5	-4	4	-2	-5	-4	0	-2	-5	-4	-4	1	0	0	0	1	0.113	-0.837	1.477	1.357	-1.453	0.20532	0	2	-2	-3	-4	1	0	-3	4	1	2	1	0	-3	-4	-2	0
1	0.17705	-1	-1	-3	-3	-3	-1	-2	-3	0	4	2	1	-1	-3	-4	2	-1	-5	-3	0	1	0	0	0	1	-0.277	1.648	0.533	1.831	-0.561	0.18123	3	-4	-3	-4	-3	-4	-4	6	-4	-5	-5	-3	-4	-5	-4	-2	-3
1	0.043504	-2	-5	-4	-5	-2	-5	-5	-4	-4	5	0	-5	0	6	-5	-3	1	-2	-1	1	1	0	0	1	0	-0.397	0.412	1.891	-1.006	-0.59	0.044079	-3	5	1	-3	-4	-1	-2	-4	7	-4	-4	-1	-2	-3	-4	-2	-3
1	0.88598	0	-3	-3	-3	-4	2	-3	4	-4	-5	-4	-3	1	-5	5	0	-1	4	-4	-4	0	0	1	0	1	-0.503	-1.853	-3.005	0.931	-0.179	0.89399	4	0	-3	-4	2	-3	-2	3	-4	-3	-2	-3	2	-4	1	-2	-2
1	0.01975	-3	-5	-3	-3	-5	-5	-5	7	-5	-3	-6	-4	-6	-6	-5	-3	-4	-6	-6	-6	1	0	0	1	0	1.045	2.064	1.33	-0.384	1.652	0.024579	-3	-5	-6	-7	-4	-5	-6	-7	-6	3	6	-5	2	-3	-6	-4	-4
1	0.084359	-3	-5	-5	-6	-3	-5	-5	-6	-5	4	2	-5	0	-3	-5	-4	-3	-5	-3	6	0	1	0	1	0	1.266	-0.912	-1.505	-1.019	-0.987	0.077663	-4	-5	-6	-6	-3	-5	-5	-6	-5	3	5	-5	0	-2	-5	-5	-3
1	0.079374	6	-4	-3	-4	1	-3	-3	-1	-4	-3	-4	-3	-3	-5	-3	-1	-2	-5	-4	1	1	0	0	1	0	1.57	-0.146	-0.733	-0.591	-1.302	0.074761	1	1	-1	2	-5	0	5	-3	-3	-5	-5	3	-3	-5	-4	-2	-1
1	0.4235	0	-2	-1	-1	-2	-1	-1	-2	-1	-2	-2	-1	-2	-2	1	3	4	-2	1	-1	0	0	1	1	0	0.908	1.313	2.213	-0.032	0.326	0.4181	-1	-1	2	5	0	-1	0	0	1	-2	-2	0	-2	-2	-1	-1	-1
1	0.1619	-2	-2	-1	1	-4	5	0	-1	0	-3	-3	-2	-3	0	-2	-1	-2	-1	6	-3	0	0	1	1	0	-0.397	0.412	1.891	-1.006	-0.59	0.1275	-1	3	0	-2	-2	0	-2	3	0	1	-3	3	-2	-4	-2	-2	-1
1	0.26889	5	-4	-3	-5	-1	-1	-4	-1	5	-2	-5	-4	-3	1	-4	2	-1	-1	2	-3	0	0	1	1	0	-0.397	0.412	1.891	-1.006	-0.59	0.18206	-2	0	4	6	-3	-1	1	-3	2	-5	-4	0	-4	-5	-4	-2	-3
1	0.034876	4	-4	-3	-4	5	-3	-3	-1	-4	-2	-3	-3	-3	-4	2	2	0	-5	-4	0	0	1	0	1	0	-1.02	-0.255	-0.862	-1.343	0.465	0.033256	-2	-4	-5	-5	-4	-5	-5	-3	-2	-2	-2	-5	-2	8	-5	-3	-3
1	0.022545	-3	-2	4	5	-5	0	3	0	0	-5	-5	0	-5	-5	-4	-2	-3	-6	-4	-5	0	0	1	0	1	-0.169	0.933	1.299	0.945	0.828	0.021334	-2	-1	1	0	-5	-2	-1	6	-3	-6	-5	-2	-5	-5	-4	-1	-1
1	0.031728	-1	-3	-2	-3	-3	0	-3	-3	-4	-3	-3	-3	-3	-4	-1	0	7	-5	-4	-2	0	0	1	1	0	0.908	1.313	2.213	-0.032	0.326	0.03186	-2	-4	-2	-3	-5	-4	-4	7	-4	-6	-6	-4	-5	-5	-4	-2	-2
1	0.65514	-1	-1	-1	-1	-5	2	0	-2	0	-1	0	1	-4	-1	5	-1	-1	0	-1	-2	0	0	1	1	0	0.421	-1.392	-1.628	0.189	2.081	0.69728	-1	-1	0	1	-5	0	1	-1	-4	1	0	0	1	1	0	0	0
1	0.11307	6	-4	-3	-4	1	-3	-3	-2	-4	-4	-4	-3	-3	-5	-3	2	2	-5	-4	-2	1	0	0	1	0	1.57	-0.146	-0.733	-0.591	-1.302	0.11873	1	-5	-5	-5	-3	-4	-4	-5	-5	3	0	-4	-1	-3	-4	-3	1
1	0.34657	-2	-1	-2	0	-6	-1	1	-2	-3	-5	-5	0	-4	-6	7	-3	-3	-6	-4	-5	0	0	1	0	1	0.421	-1.392	-1.628	0.189	2.081	0.307	0	2	-2	-3	-2	5	-2	-4	1	-2	-1	2	-1	-4	1	2	-1
1	0.049284	1	-4	-3	-2	-3	-3	-3	4	1	-5	-4	-2	1	-2	-2	4	-2	-4	0	-4	0	0	1	1	0	0.67	-2.647	-4.76	-0.228	1.399	0.041026	-3	-4	6	0	6	-1	-3	-3	-3	0	-4	-3	-4	-5	-4	-2	4
1	0.27734	-2	-1	0	4	-4	2	4	-4	1	-4	-4	-1	-2	-2	-1	0	-1	3	-1	-3	1	0	0	0	1	-0.503	-1.853	-3.005	0.931	-0.179	0.24504	-2	3	1	3	-3	1	4	-2	-2	-5	-5	0	-5	-2	-3	-1	-2
1	0.1299	-1	-3	-5	-4	0	-2	-3	-3	-2	4	2	-5	2	2	-5	-3	-2	-4	1	4	1	0	0	1	0	0.393	0.816	2.131	-1.239	-0.547	0.12441	-1	2	-3	-3	-1	4	-3	-3	1	-1	0	0	1	-1	-1	0	-2
1	0.41486	-2	-2	1	1	-5	1	1	-2	7	-5	-3	0	0	-2	0	0	2	0	0	-4	0	0	1	0	1	-1.474	-0.078	-1.673	0.336	-0.417	0.4208	-1	-2	-2	1	-2	1	2	-1	-2	0	2	-1	3	1	-2	-3	-2
1	0.23996	-1	-3	-1	-2	-3	-3	-3	7	-3	-5	-5	-2	-4	-4	-3	-1	-2	-3	-4	-4	0	0	1	1	0	1.045	2.064	1.33	-0.384	1.652	0.1944	-2	0	-1	-1	-4	7	1	-3	0	-4	-3	1	-1	-4	-2	-1	-1
1	0.60961	0	4	1	-3	-4	-1	-2	-3	-2	-1	-3	5	0	0	-3	-1	0	-4	-3	-2	1	0	0	0	1	-0.277	1.648	0.533	1.831	-0.561	0.64276	-1	-3	-4	-4	-3	-3	-4	-2	-4	-1	5	0	1	1	-4	-2	0
1	0.23747	-2	-4	-2	-3	-3	-3	-3	-3	-3	-2	-3	-3	-3	-4	-2	-1	7	-5	-3	0	1	0	0	1	0	0.908	1.313	2.213	-0.032	0.326	0.23807	2	-1	-2	0	-5	0	5	-2	-3	-2	-2	0	-2	-5	1	0	-2
1	0.32857	-1	1	4	1	-4	-1	1	3	-2	-4	-4	2	-3	-4	-3	-1	-2	-4	-4	-4	1	0	0	0	1	-0.169	0.933	1.299	0.945	0.828	0.32019	-1	-4	-5	-5	9	-2	-5	-5	-5	-2	3	-4	-1	0	-5	-2	-3
1	0.64905	1	-3	1	-2	-3	-1	0	4	-3	-3	-3	0	-3	0	2	1	-2	-4	-3	-1	0	0	1	0	1	1.045	2.064	1.33	-0.384	1.652	0.62465	0	0	-2	1	-3	-1	3	-3	-2	-3	-1	4	1	-1	-3	-2	-1
1	0.46436	5	-2	1	-2	-2	-2	-2	-1	-2	-3	-3	-2	-2	-4	-2	1	-1	-4	-3	-1	0	0	1	1	0	1.57	-0.146	-0.733	-0.591	-1.302	0.43226	-1	0	-1	-1	-4	7	1	-3	-1	-4	-3	0	-2	-4	-2	2	-1
1	0.48277	2	1	0	2	-5	2	1	-1	0	-5	-3	2	-1	-5	0	1	-1	-5	-4	-3	1	0	0	0	1	-0.277	1.648	0.533	1.831	-0.561	0.39229	-1	2	0	-1	0	2	-1	-2	1	-1	0	0	-2	0	0	-2	0
1	0.54278	1	0	1	1	-5	1	2	-3	0	-3	-1	0	0	0	1	-1	-2	2	3	-3	1	0	0	0	1	0.44	2.897	1.502	1.538	-0.055	0.54253	-1	4	-3	-2	-4	-1	0	-3	-4	1	1	0	-1	-3	2	-2	-1
1	0.070831	-2	3	2	-3	-5	7	0	-3	-1	-4	-2	1	1	-5	-4	-2	-2	-5	-3	-4	1	0	0	0	1	-0.503	-1.853	-3.005	0.931	-0.179	0.085238	-3	5	-2	-4	-6	-1	-2	-4	-3	-5	-2	6	-4	-5	-4	-3	-3
1	0.049703	-1	5	1	-1	-5	1	0	-3	1	-5	-5	4	-4	-5	1	-2	-3	-5	-4	-5	1	0	0	0	1	0.113	-0.837	1.477	1.357	-1.453	0.049884	-2	-3	-1	-4	-5	-2	-4	0	3	-3	0	-4	1	5	-5	-2	-1
1	0.030292	-3	-5	-5	-4	-5	-4	-4	-5	-5	-5	-5	-3	-5	-6	9	-3	-4	-6	-6	-5	0	0	1	1	0	0.421	-1.392	-1.628	0.189	2.081	0.035939	-2	-1	1	-4	-1	-3	-4	-5	-1	-1	5	-4	3	-2	-5	-2	3
1	0.64827	0	0	1	1	-1	0	2	-1	0	-1	-1	0	-1	-1	0	1	0	2	0	-1	0	0	1	0	1	-0.169	0.933	1.299	0.945	0.828	0.67421	0	0	0	1	-1	3	2	-1	-1	-1	-1	0	-1	0	-1	0	0
1	0.015454	-2	-5	-5	-4	-6	-4	-4	-5	-5	-6	-6	-4	-5	-7	9	-3	-4	-7	-6	-5	1	0	0	0	1	0.421	-1.392	-1.628	0.189	2.081	0.015853	0	-2	-2	0	-6	4	6	-5	-2	-4	-5	0	-4	-5	-3	-2	-2
1	0.056267	-1	-4	-5	-5	1	-4	-5	-3	-4	1	4	-4	2	5	-5	-3	-3	-3	-2	-1	1	0	0	1	0	-0.397	0.412	1.891	-1.006	-0.59	0.043675	3	-5	-4	-5	-1	-4	-5	1	-5	2	1	-4	0	0	-5	-1	2
1	0.6305	4	-4	-4	-4	-2	-4	-4	-2	-4	0	1	-2	1	2	-1	1	0	-4	-2	1	1	0	0	1	0	1.266	-0.912	-1.505	-1.019	-0.987	0.62503	4	-4	-4	-3	0	-1	-3	-2	-1	0	-3	-2	0	-1	0	2	1
1	0.63956	0	-1	0	0	-5	1	-1	-1	1	0	-2	0	1	0	0	1	1	4	0	-1	0	0	1	0	1	0.908	1.313	2.213	-0.032	0.326	0.61685	-1	0	0	0	2	0	0	-1	2	0	-1	0	2	1	0	-1	0
1	0.21481	0	3	-2	-3	1	2	-2	2	0	-2	-3	3	-3	-4	-3	-1	0	-4	-3	1	0	1	0	0	1	0.44	2.897	1.502	1.538	-0.055	0.19429	-3	8	-2	-3	-4	-1	-2	-4	-2	-4	-4	0	-3	-4	-3	-2	-3
1	0.26541	-2	-2	-3	-3	-3	4	-2	-4	-2	3	1	-2	-1	3	-3	-1	-1	-2	2	1	0	1	0	0	1	1.57	-0.146	-0.733	-0.591	-1.302	0.28667	-3	-2	-1	-2	-4	-1	-1	-3	10	-4	-4	-2	-3	-3	-3	-2	-3
1	0.27861	0	-3	-1	6	-4	-2	0	-3	0	-4	-5	-2	-4	-5	1	2	3	-5	-4	-4	1	0	0	1	0	0.908	1.313	2.213	-0.032	0.326	0.20641	3	-4	-2	-3	-3	-3	-3	6	-4	-5	-5	-3	-4	-5	-3	1	-1
1	0.20509	-2	-4	-4	-3	-4	-3	-3	-3	-4	-4	-4	-3	-4	-5	8	-2	-3	-5	-4	-4	0	0	1	1	0	0.421	-1.392	-1.628	0.189	2.081	0.18775	3	-2	7	-1	-3	-2	-2	-2	-2	-4	-4	-2	-3	-4	-3	0	-2
1	0.41614	-3	7	-2	-3	-5	-1	-2	-4	-1	1	-3	0	-2	-4	-4	-2	-3	-4	-3	-2	0	0	1	1	0	0.44	2.897	1.502	1.538	-0.055	0.41767	0	2	-2	-3	-4	-1	-1	-3	-3	-2	-3	5	-2	-4	-3	-2	-2
1	0.03722	-4	-5	-6	-6	-3	-5	-6	-7	-3	4	3	-5	1	2	-6	-5	-3	-2	5	3	0	1	0	1	0	0.393	0.816	2.131	-1.239	-0.547	0.027922	-3	-6	-6	-6	-4	-6	-6	-7	-6	6	2	-6	-1	-3	-6	-5	-3
1	0.26335	-2	2	0	-3	-5	0	-1	-2	2	-5	-5	6	-4	-6	-2	-1	-3	-5	-4	-5	0	0	1	0	1	-0.277	1.648	0.533	1.831	-0.561	0.29733	1	5	1	-3	-5	-2	-2	-1	-2	-5	-4	2	-4	-5	-3	2	-2
1	0.15463	-1	-4	-5	-5	-1	-4	-4	-5	-5	2	-1	-3	-1	-2	-4	-4	-2	-5	-3	7	0	1	0	1	0	1.242	-1.262	-0.544	-1.337	-0.279	0.15797	-1	-4	-3	-3	7	-3	-3	-3	-4	-2	-2	-3	1	-4	-4	4	0
1	0.18078	-1	2	0	1	-1	1	2	-3	1	-3	-4	2	-2	-5	-1	0	3	-3	-5	-2	0	1	0	0	1	-0.277	1.648	0.533	1.831	-0.561	0.14832	-4	-4	-6	-6	0	-2	-5	-6	-2	4	3	-4	1	2	-5	-5	-1
1	0.15079	-1	2	-1	2	-3	0	1	-3	0	-3	-2	3	0	-2	2	-1	0	-2	-2	-2	0	1	0	0	1	-0.277	1.648	0.533	1.831	-0.561	0.16809	-1	-2	-3	-1	6	-2	-2	-2	1	0	0	-2	-2	-3	3	-1	0
1	0.050006	-3	-3	-3	-1	-6	0	8	-5	-3	-6	-6	-2	-5	-6	-4	-3	-3	-6	-5	-5	1	0	0	1	0	0.113	-0.837	1.477	1.357	-1.453	0.045487	-4	8	-3	-4	-6	-1	-3	-5	-3	-6	-5	0	-4	-6	-5	-3	-4
1	0.025533	-3	1	-3	-3	-6	-1	-2	-4	-3	-5	-5	8	-4	-6	-3	-3	-3	-6	-4	-5	1	0	0	1	0	-0.277	1.648	0.533	1.831	-0.561	0.025571	-2	-1	-4	-5	-5	-1	-1	-5	1	-4	-2	-2	-1	1	-5	-4	-4
1	0.40126	0	-3	3	3	-4	-1	2	2	-3	-3	-4	-1	-4	-4	-2	1	0	-4	-3	-4	0	0	1	0	1	-0.169	0.933	1.299	0.945	0.828	0.45006	-2	-2	1	0	-3	-1	-2	-2	-3	-3	-3	-3	-3	-4	0	1	6
1	0.12219	0	-3	-2	-3	1	-3	-3	-3	-3	-1	-1	-3	-1	-1	-3	4	4	-4	-3	1	0	1	0	1	0	0.908	1.313	2.213	-0.032	0.326	0.093093	-2	1	-3	-4	-3	-3	-3	1	-4	0	-2	-3	1	0	-4	0	-2
1	0.039607	-2	-4	-3	-4	-1	-3	-3	-4	-4	-2	2	-3	-2	-4	-3	-1	6	-5	-4	0	1	0	0	1	0	0.908	1.313	2.213	-0.032	0.326	0.032424	-3	-4	-1	8	-6	-3	0	-3	-3	-5	-2	-3	-4	-5	-4	-2	-3
1	0.53287	-1	-1	0	-1	-5	1	2	-2	-3	-4	-4	5	-4	-2	2	0	-1	-5	-4	-2	1	0	0	0	1	0.421	-1.392	-1.628	0.189	2.081	0.56337	3	-2	1	0	-3	-1	-2	-3	4	0	-1	3	-3	-4	-3	0	-2
1	0.76714	4	-3	1	1	-3	0	0	0	-3	-4	-1	-1	-3	-4	-3	3	1	-5	-4	-3	1	0	0	0	1	0.67	-2.647	-4.76	-0.228	1.399	0.77715	-2	2	-2	-3	-4	1	1	-4	-3	-4	-4	4	-3	2	-3	1	2
1	0.15372	3	-2	-3	-4	-4	-3	-2	-2	2	0	-1	-2	0	1	-5	-2	1	1	5	2	1	0	0	1	0	-0.838	1.512	3.097	0.26	0.83	0.12514	1	0	3	3	-5	2	3	-1	0	-5	-5	1	-4	-5	-4	1	-1
1	0.16889	0	-2	-3	1	-5	0	4	-5	-1	-3	-2	-2	-4	5	-4	-1	-2	-3	3	-3	0	0	1	0	1	-0.503	-1.853	-3.005	0.931	-0.179	0.21272	0	-5	-5	-5	-2	-4	-4	-5	-5	4	-1	-4	-1	-2	6	-2	-2
1	0.14967	-1	3	0	-2	-5	-1	1	-1	4	-2	0	2	-1	-1	-4	-1	0	1	2	-3	0	1	0	1	0	-1.474	-0.078	-1.673	0.336	-0.417	0.093103	5	-4	-4	-4	2	-4	-4	2	-4	-4	-4	-3	-4	-5	-4	1	0
1	0.1966	-2	-2	2	1	-4	1	1	4	2	-1	-4	0	-3	-4	-3	-2	1	-4	-4	-3	0	0	1	0	1	1.045	2.064	1.33	-0.384	1.652	0.18102	-1	-1	-2	-3	-4	-1	0	-1	2	1	-2	2	1	-2	4	-2	-1
1	0.1633	-4	-5	-5	-5	-4	-5	-5	-5	-4	0	4	-5	-1	5	-1	-1	-1	-3	2	0	0	1	0	1	0	1.266	-0.912	-1.505	-1.019	-0.987	0.13147	-2	1	-2	-4	-5	6	-2	-5	5	-2	-3	0	1	-5	-2	-1	-3
1	0.26932	1	0	0	1	-4	1	3	1	0	-3	-2	1	-4	-3	1	0	-1	-5	-4	-3	1	0	0	0	1	1.045	2.064	1.33	-0.384	1.652	0.27548	1	1	1	3	-1	1	1	-3	2	-2	-1	1	-1	-1	-1	0	-1
1	0.068247	-1	-4	-4	-4	1	-4	-4	-4	-1	1	0	-4	-1	6	-4	-2	-1	-2	1	2	0	1	0	1	0	-0.397	0.412	1.891	-1.006	-0.59	0.062854	2	-3	-3	-3	1	-3	-3	4	-3	-3	-2	-3	-3	4	-3	1	-2
1	0.5657	3	-3	3	2	-2	1	-1	-3	-1	-2	0	0	1	-5	-3	2	-2	-5	-4	-2	0	0	1	0	1	1.57	-0.146	-0.733	-0.591	-1.302	0.58754	-1	3	2	-1	-5	-1	3	3	-3	-2	-5	1	-4	-5	-2	0	0
1	0.98058	0	-1	0	-2	1	1	0	-2	-1	0	-1	-1	1	-2	3	2	-1	2	-1	1	0	0	1	0	1	1.242	-1.262	-0.544	-1.337	-0.279	0.98033	-2	0	-4	-2	-5	1	-4	-2	2	-1	-2	-1	-4	-4	5	1	-1
1	0.96451	1	-3	2	1	0	2	-2	1	2	-2	-4	-1	-3	-4	2	2	0	-4	-1	-3	0	0	1	1	0	-0.169	0.933	1.299	0.945	0.828	0.96438	1	2	-2	-1	-4	-1	-1	-2	-3	-3	-1	4	-3	-4	1	-2	-1
1	0.83212	-4	0	1	0	-5	1	0	-1	2	0	-1	0	-4	1	0	0	0	4	2	0	0	0	1	1	0	-0.397	0.412	1.891	-1.006	-0.59	0.84275	0	2	2	1	1	0	0	-1	-4	0	-2	0	1	-5	1	0	1
1	0.43562	0	1	-3	-2	2	3	1	-1	3	-1	-1	-2	0	0	-3	-2	-1	0	0	-1	1	0	0	0	1	-0.503	-1.853	-3.005	0.931	-0.179	0.41418	0	1	0	3	-1	0	3	-2	-3	-3	-1	1	-2	-3	1	0	-1
1	0.32836	-2	-3	1	2	1	1	-2	4	0	-4	-4	-3	-4	-2	1	2	1	-5	-4	-4	0	0	1	0	1	1.045	2.064	1.33	-0.384	1.652	0.27537	0	2	-3	-4	1	-3	-2	2	-2	-3	0	0	-2	1	1	-1	1
1	0.12734	4	-4	-4	-4	0	-3	-3	0	-4	-1	2	-3	5	-3	-4	-2	-3	-4	-4	-1	0	1	0	1	0	1.266	-0.912	-1.505	-1.019	-0.987	0.089203	-3	6	-1	-3	-5	0	1	-4	-1	-5	-4	3	-3	-4	3	-2	-1
1	0.09062	0	-4	-2	-3	1	-4	-3	7	-4	-6	-6	-3	-5	-3	-4	1	-3	-5	-5	-5	0	0	1	0	1	1.045	2.064	1.33	-0.384	1.652	0.10025	-2	-4	1	5	-5	-2	3	2	-3	-6	-6	-2	-5	-5	-4	0	-1
1	0.011928	-2	2	1	4	-6	2	3	-4	0	-3	-4	3	-2	-5	-4	-1	-2	-6	-3	-3	1	0	0	0	1	-0.277	1.648	0.533	1.831	-0.561	0.011393	7	-4	-4	-4	-3	-3	-3	-2	-4	-4	-4	-3	-4	-5	-3	1	-2
1	0.43648	-2	-2	-1	5	-4	0	3	-3	1	-3	-1	-1	0	-3	-3	1	0	-4	-1	-1	1	0	0	0	1	1.266	-0.912	-1.505	-1.019	-0.987	0.43295	-3	-3	-1	6	-4	-1	4	-3	-2	-4	-1	-2	-3	-4	-3	-2	-3
1	0.072112	-1	-3	0	4	-5	1	3	-3	4	-5	-3	-1	-2	-5	-4	2	1	-1	-4	-4	1	0	0	0	1	0.67	-2.647	-4.76	-0.228	1.399	0.082183	-1	-3	6	0	2	1	0	-3	-3	1	-1	-3	-3	-4	-4	-1	0
1	0.45823	2	1	0	-2	-4	1	0	-2	-3	-5	-5	4	-4	-5	-3	4	0	-5	-4	-4	1	0	0	0	1	-0.277	1.648	0.533	1.831	-0.561	0.43021	-2	-5	-3	-5	-4	-5	-5	-6	-5	4	4	-5	3	2	-5	-4	-1
1	0.1064	-2	-5	-6	-6	-1	-5	-6	-6	-5	0	5	-5	2	2	-6	-4	-1	-4	-1	0	1	0	0	1	0	1.266	-0.912	-1.505	-1.019	-0.987	0.10451	2	2	-2	-2	-5	1	3	3	-1	-5	-3	2	-1	-6	-3	-2	-3
1	0.45154	-1	-3	-4	-4	-1	-2	-4	-1	-5	-5	-4	-4	-5	-6	8	0	-2	-6	-5	-1	1	0	0	1	0	0.421	-1.392	-1.628	0.189	2.081	0.41352	-1	-5	-1	-5	0	-4	-5	-1	-2	1	4	-5	2	4	-5	-3	-4
1	0.077258	1	-4	-2	-5	-2	-4	-5	-5	-5	2	4	-5	1	-1	-5	-3	0	-5	-3	2	1	0	0	1	0	0.908	1.313	2.213	-0.032	0.326	0.07879	4	-4	-4	-5	0	1	-4	-3	-1	4	-1	-4	-1	0	-4	-3	-2
1	0.13268	-3	-2	2	-2	-5	0	-2	-4	9	-5	-5	-2	-3	-2	-4	-2	-3	-4	2	-5	0	0	1	1	0	-1.474	-0.078	-1.673	0.336	-0.417	0.1268	-2	-5	-5	-5	3	-4	-5	-5	-5	6	0	-4	-1	-2	-4	-4	-2
1	0.24622	-3	-1	-4	-4	-5	-3	-3	-1	-4	-2	-4	1	1	-5	7	-3	-2	-6	-5	-2	0	0	1	0	1	-0.277	1.648	0.533	1.831	-0.561	0.22268	-4	-5	-6	-6	-4	-5	-5	-6	-5	7	2	-5	-1	1	-5	-5	-3
1	0.080417	6	-1	-4	-3	3	-1	-1	0	-4	-4	-5	-2	-4	-5	-3	0	-2	-5	-2	-3	1	0	0	1	0	1.57	-0.146	-0.733	-0.591	-1.302	0.071633	-2	-5	-5	-6	1	-5	-5	-6	-6	7	-1	-5	4	-3	-5	-3	2
1	0.39446	-2	-2	-1	3	-5	1	3	-1	4	-5	-4	-2	0	-5	4	-3	-1	-5	-4	-4	0	0	1	0	1	-0.259	-3.242	-3.656	1.05	0.302	0.38084	-3	-4	-4	-2	-4	-4	-4	-3	-3	-1	0	-4	-3	5	1	-2	-2
1	0.94466	0	0	-1	1	-5	4	4	-3	-3	-4	-4	1	1	-6	-3	0	-1	-5	-5	-4	1	0	0	0	1	-0.503	-1.853	-3.005	0.931	-0.179	0.9435	1	1	0	3	-5	0	3	-3	-2	-5	-3	1	-4	-4	-4	2	-1
1	0.84403	1	2	-1	-3	-5	2	2	-2	5	-4	-2	1	-4	-3	-4	2	-1	-5	-2	-1	1	0	0	0	1	0.44	2.897	1.502	1.538	-0.055	0.84373	1	-2	-1	-3	-3	0	2	-5	-3	1	2	0	0	-4	-3	-2	-1
1	0.98975	-2	-1	3	-2	-4	-1	-2	4	4	-4	-4	2	-3	-4	-3	1	-2	-4	-2	-1	0	0	1	0	1	1.045	2.064	1.33	-0.384	1.652	0.98979	-1	-2	-1	-2	-3	-2	-2	5	-3	-4	-4	1	-3	-4	-3	2	2
1	0.19185	3	-4	-2	-4	1	-3	-3	0	-4	1	-1	-3	3	-4	3	0	0	-4	-4	1	0	0	1	1	0	1.57	-0.146	-0.733	-0.591	-1.302	0.14326	-4	-4	-5	-6	-4	-4	-5	-5	-3	1	4	-5	1	5	-5	-4	-3
1	0.84055	0	1	0	-1	-3	0	0	-2	-1	-3	-3	5	-2	-3	-2	3	0	-4	-2	-3	0	0	1	0	1	-0.277	1.648	0.533	1.831	-0.561	0.84752	4	-2	-1	-2	-1	-1	-1	-1	-2	-2	-3	-1	-2	-3	1	3	0
1	0.21083	-2	-4	-2	-3	-5	-4	-5	7	-5	-6	-6	-4	-5	-5	-5	-2	-2	1	-5	-4	0	0	1	1	0	1.045	2.064	1.33	-0.384	1.652	0.21972	-3	7	-3	-4	-4	0	-3	-5	-2	-5	-5	-1	-3	-5	-1	0	-4
1	0.55663	3	-3	-1	-2	-1	-3	-3	-1	-4	-5	-4	-2	-4	-5	-2	6	0	-5	-4	-4	0	0	1	0	1	0.67	-2.647	-4.76	-0.228	1.399	0.52728	1	2	-4	-5	-2	-2	-4	-3	-3	1	2	-1	0	2	-5	-3	-1
1	0.18902	-3	-4	-5	-3	-3	-4	-4	-5	1	3	0	-4	-1	4	-5	-3	-2	1	7	-1	1	0	0	1	0	-0.838	1.512	3.097	0.26	0.83	0.19073	-4	-5	-6	-6	-4	-5	-5	-6	-5	0	6	-5	1	-2	-3	-5	-4
1	0.028562	7	-4	-4	-4	-3	-3	-3	-2	-4	-4	-4	-3	-3	-5	-3	-1	-2	-5	-4	-3	1	0	0	1	0	1.57	-0.146	-0.733	-0.591	-1.302	0.036065	0	-5	-5	-5	5	-4	-4	-5	-5	4	4	-5	0	-3	-5	-2	1
1	0.76853	-3	-5	-5	-5	-3	-5	-5	-6	-5	6	0	-5	-1	-1	-5	-4	-3	-5	-3	5	0	1	0	1	0	0.393	0.816	2.131	-1.239	-0.547	0.77151	-3	0	-4	-5	-4	-3	-2	-5	-4	1	3	1	-1	-2	-4	-3	-3
1	0.039471	0	0	0	2	-4	1	3	-1	3	-4	-3	1	-3	0	-1	-1	-1	-1	0	-4	1	0	0	0	1	-0.397	0.412	1.891	-1.006	-0.59	0.031578	1	-3	-2	-2	-1	-3	1	-5	-2	2	2	-3	-1	1	-5	-1	0
1	0.45691	0	-4	-5	-5	-2	-3	-4	-3	-2	3	4	-4	4	0	-5	-3	-3	-1	-1	2	1	0	0	1	0	1.242	-1.262	-0.544	-1.337	-0.279	0.51535	-2	-1	-2	-5	-4	-2	-4	-4	-3	-1	3	-3	7	3	-5	-1	-2
1	0.40934	0	-1	-1	1	-1	0	0	0	-1	0	0	0	0	0	2	0	0	-2	-1	0	1	0	0	0	1	1.266	-0.912	-1.505	-1.019	-0.987	0.30608	1	0	0	1	-1	1	3	-1	-1	-2	-1	1	-2	-1	-1	-1	-1
1	0.31017	0	0	0	0	-1	1	1	2	1	-2	-2	2	-1	-2	0	1	-1	-2	-2	-2	0	0	1	0	1	-0.277	1.648	0.533	1.831	-0.561	0.21518	0	-2	1	1	-1	-1	0	2	0	-2	-2	1	-1	-3	-2	2	1
1	0.67515	-1	-2	1	-2	-4	-2	0	5	-1	-4	-3	0	0	-3	-3	0	-1	-4	2	-4	0	0	1	0	1	-0.169	0.933	1.299	0.945	0.828	0.6131	1	-1	0	0	-4	3	4	0	-2	-4	-3	1	-3	-4	1	-1	-1
1	0.57364	1	-1	0	0	-2	-2	-1	5	1	-4	-4	-1	0	-3	0	1	-1	-4	-4	-3	0	0	1	0	1	1.045	2.064	1.33	-0.384	1.652	0.52767	0	1	1	0	-4	2	2	-1	-1	-2	-2	2	-3	-4	2	1	1
1	0.039913	-1	-2	1	-3	-4	-2	0	3	-4	-2	-4	-3	-3	-3	-2	3	4	-5	-4	-3	0	1	0	1	0	0.908	1.313	2.213	-0.032	0.326	0.041138	-3	-4	-5	-5	-4	-4	-5	-5	-5	1	5	-2	6	2	-5	-4	-3
1	0.95538	0	2	2	-1	-4	2	1	-1	-2	-3	-3	3	-4	-5	3	0	-2	-5	-4	-4	0	0	1	0	1	0.421	-1.392	-1.628	0.189	2.081	0.9554	-2	0	-1	-1	-5	3	1	-2	-3	-3	-3	5	0	-4	-1	0	0
1	0.41672	0	0	-1	-1	-5	0	1	0	-1	-2	-1	-2	-1	3	1	-2	-1	1	2	1	0	0	1	0	1	-0.397	0.412	1.891	-1.006	-0.59	0.39134	0	-2	-1	1	-4	-1	1	1	0	-1	-2	-2	0	-3	3	0	-1
1	0.15449	-1	-5	-6	-5	-5	-5	-6	-4	-5	1	5	-4	2	4	-5	-4	-3	-4	-2	2	1	0	0	1	0	1.266	-0.912	-1.505	-1.019	-0.987	0.13368	3	2	-1	2	-4	0	3	0	0	-4	-4	1	-4	-5	-2	-1	-2
1	0.015051	-3	-2	3	2	-3	-4	-3	-5	-3	0	-1	-1	5	4	-6	-1	-1	-2	2	1	0	1	0	1	0	-0.169	0.933	1.299	0.945	0.828	0.017047	-1	-5	-4	-5	-2	-4	-4	-4	-5	-4	-2	-4	1	-5	-3	2	7
1	0.35486	1	2	0	1	-3	1	3	-3	1	-1	-1	0	-2	1	-3	-1	0	-5	-2	-1	0	0	1	0	1	0.113	-0.837	1.477	1.357	-1.453	0.32645	0	1	-1	-3	1	-1	-2	0	3	-1	1	-3	0	2	-2	0	-1
1	0.050743	-2	-2	-2	-2	-3	-1	4	-2	1	-1	-1	-2	-1	6	-3	-2	-1	0	1	-1	1	0	0	1	0	-0.397	0.412	1.891	-1.006	-0.59	0.056495	-1	6	-1	-2	-3	1	-1	-2	1	-2	-2	2	-2	-3	-2	-2	0
1	0.15906	-4	4	-2	3	-5	-2	-3	-3	-2	1	2	-2	-2	-2	-5	-3	-2	-5	-2	3	0	1	0	0	1	1.266	-0.912	-1.505	-1.019	-0.987	0.089534	1	0	-2	3	-5	2	3	-4	2	-4	-4	1	-4	-5	1	-1	-2
1	0.37204	3	-2	1	3	-5	1	3	-1	-3	-4	-5	-1	-4	-5	-4	1	0	-6	-5	-4	0	0	1	0	1	-0.259	-3.242	-3.656	1.05	0.302	0.3313	0	-4	4	1	-5	-3	-3	5	-2	-6	-5	-4	-5	-3	-3	0	-3
1	0	0	0	0	0	0	0	0	0	0	0	0	0	0	0	0	0	0	0	0	0	0	0	0	0	0	0	0	0	0	0	0.63751	-2	-2	-3	-4	-2	-1	-3	-4	-3	0	1	-2	9	-1	-4	-2	-2
1	0.19545	-2	5	-2	-3	2	0	-1	-3	1	-3	-2	4	1	-4	-3	-2	-2	-4	-3	-3	0	0	1	0	1	0.44	2.897	1.502	1.538	-0.055	0.21102	3	-2	0	-2	-2	1	2	-1	-2	0	-3	0	-2	-3	-2	2	1
1	0.25675	-1	-2	2	1	-1	0	-1	3	2	-3	-3	-2	-3	-2	2	0	0	0	-1	-3	0	0	1	0	1	1.045	2.064	1.33	-0.384	1.652	0.19325	-2	-2	1	1	1	1	3	2	0	-2	-3	-2	-3	-3	2	-1	-1
1	0.046892	-3	-5	-5	-6	-3	-5	-5	-6	-3	4	-1	-5	-1	-2	-5	-4	-3	-5	-4	6	0	1	0	1	0	0.393	0.816	2.131	-1.239	-0.547	0.028991	-4	7	2	-3	-4	-1	-2	-4	4	-5	-4	2	-4	-5	-4	-2	-3
1	0.077393	-1	-1	1	0	-3	-1	-1	4	2	-2	-5	1	-2	-5	-3	-1	2	-5	-3	-4	0	0	1	0	1	1.045	2.064	1.33	-0.384	1.652	0.053874	1	1	1	0	4	-1	0	-3	-2	-3	-1	0	-1	-4	-3	0	0
1	0.020487	-3	-2	-2	-4	-2	-3	-4	-5	3	0	-1	-1	-2	-3	-4	-2	5	-4	2	3	0	1	0	1	0	-0.838	1.512	3.097	0.26	0.83	0.018555	-4	-6	-6	-6	-4	-5	-6	-6	-6	7	-1	-5	-1	-3	-5	-5	-3
1	0.64929	-1	-3	-3	-4	-3	0	-2	-1	3	3	1	-2	0	2	-4	-2	-1	-3	2	2	1	0	0	1	0	1.242	-1.262	-0.544	-1.337	-0.279	0.66141	-1	-1	-2	-4	-3	-1	-3	-4	-4	3	4	-2	3	-1	-3	-3	-2
1	0.28949	-2	-3	0	0	-6	1	7	-5	2	-5	-6	-3	-2	-5	-3	-2	1	-4	-4	-4	1	0	0	1	0	0.113	-0.837	1.477	1.357	-1.453	0.26257	0	-5	-6	-7	-1	-6	-6	-6	-3	3	4	-4	-1	4	-2	-4	-3
1	0.34574	-1	0	1	-2	-2	-2	1	-3	-2	2	0	0	0	-2	1	-1	-1	-5	1	2	1	0	0	0	1	1.242	-1.262	-0.544	-1.337	-0.279	0.39893	0	-1	2	2	-5	1	3	-1	-1	-2	-2	1	-1	-1	-1	0	-2
1	0.043683	-3	-5	-6	-6	-3	-5	-5	-6	-6	4	6	-5	1	-2	-5	-5	-3	-5	-3	-1	1	0	0	1	0	1.266	-0.912	-1.505	-1.019	-0.987	0.049206	1	7	-2	-4	-3	-1	-3	-4	-1	-5	-5	0	-4	-5	-4	0	-3
1	0.64981	-1	0	0	0	2	1	-1	-5	6	-1	0	0	1	0	-1	-1	-1	-5	-3	0	1	0	0	0	1	1.242	-1.262	-0.544	-1.337	-0.279	0.66088	-2	4	0	0	-5	1	-1	-2	-4	-1	0	0	1	-1	-1	0	-1
1	0.067799	-1	0	0	1	-5	-3	-2	-3	-1	-4	-5	-1	-5	-5	4	3	3	-6	-5	-4	0	0	1	0	1	-0.277	1.648	0.533	1.831	-0.561	0.061067	-1	-1	-6	-4	-2	-4	-4	-6	-4	3	2	-3	-2	0	4	-4	-3
1	0.5197	1	0	-3	-1	-2	0	0	5	-1	-2	-3	0	-3	-5	2	-1	-1	-5	-3	-3	0	0	1	0	1	1.045	2.064	1.33	-0.384	1.652	0.44256	0	-1	0	5	-5	1	4	-2	-1	-5	-4	-1	-5	-6	-3	-1	-2
1	0.16646	-3	2	-4	-5	-4	-2	-3	-5	-4	1	4	4	0	-3	-5	-4	-3	-5	-4	-2	0	0	1	1	0	-0.277	1.648	0.533	1.831	-0.561	0.17691	-2	-5	-3	-3	-5	-4	-5	7	-5	-6	-6	-4	-5	-6	-5	-2	-4
1	0.043409	-3	-2	-3	-3	-5	8	-1	-4	-2	-4	-2	-1	4	-5	-4	-3	-3	-4	-4	-4	1	0	0	1	0	-1.005	1.212	2.219	-0.663	-1.524	0.042255	-4	-4	-4	2	-4	-3	-4	-5	-4	-1	0	-4	10	-3	-5	-4	-3
1	0.006935	0	-3	-3	-4	0	-2	-4	-4	-3	2	2	-4	4	3	-1	-2	1	2	1	1	0	0	1	1	0	1.266	-0.912	-1.505	-1.019	-0.987	0.008195	0	-4	-2	-1	5	-3	-3	3	-2	-2	-1	-4	-2	4	-4	-1	-2
1	0.04372	-1	4	2	-2	-4	-3	-1	-3	1	1	0	-1	1	0	0	0	-2	1	-3	1	0	1	0	1	0	0.44	2.897	1.502	1.538	-0.055	0.066789	-3	-3	7	1	-4	-2	-1	-2	1	-4	-4	-2	-2	-4	-1	0	3
1	0.41426	-1	0	0	0	3	1	0	-1	2	0	-1	0	2	1	0	-1	0	-5	1	-1	0	1	0	1	0	0.67	-2.647	-4.76	-0.228	1.399	0.32755	-2	1	1	2	-5	1	3	-5	3	-1	-2	1	1	-1	-1	-1	0
1	0.61463	1	-2	1	-2	-3	-1	-1	5	-1	-3	-3	0	-2	-4	0	1	-1	-4	-2	-3	0	0	1	0	1	1.045	2.064	1.33	-0.384	1.652	0.57524	0	1	-1	1	0	3	3	1	0	-2	-2	1	-3	-3	-1	0	-1
1	0.79647	-2	0	2	-2	-4	-1	-2	-3	-3	1	0	4	2	-3	-3	0	-1	-4	-3	0	0	0	1	0	1	-0.277	1.648	0.533	1.831	-0.561	0.79152	-1	-2	3	-2	-3	-2	-2	-2	-2	-3	-3	0	-3	-4	-3	3	5
1	0.96277	-1	-3	2	0	-4	2	0	0	-3	-4	-4	-3	0	-4	5	-1	0	-4	0	0	0	0	1	1	0	0.421	-1.392	-1.628	0.189	2.081	0.95799	0	-3	0	0	-4	2	1	-1	-3	-3	-1	-3	2	1	4	0	-3
1	0.27432	0	-1	0	1	0	1	3	-1	-1	0	-1	-1	-1	-1	0	1	-2	-1	1	-1	0	0	1	0	1	0.113	-0.837	1.477	1.357	-1.453	0.33733	-1	1	0	0	-3	0	-1	2	0	-1	-2	-1	-1	-2	0	0	3
1	0.85557	-3	2	0	-3	-6	-1	-2	-4	-3	-5	-5	7	-4	-6	0	-2	-3	-6	-4	-5	0	0	1	0	1	-0.277	1.648	0.533	1.831	-0.561	0.8452	-1	-2	-2	0	-2	-2	-2	-2	-2	-2	0	-2	-2	7	-1	-2	-1
1	0	0	0	0	0	0	0	0	0	0	0	0	0	0	0	0	0	0	0	0	0	0	0	0	0	0	0	0	0	0	0	0	0	0	0	0	0	0	0	0	0	0	0	0	0	0	0	0	0
1	0.093481	0	-4	-4	-5	-3	-4	-4	-4	-4	0	5	-4	4	1	-4	-4	-3	-3	1	0	0	0	1	1	0	1.266	-0.912	-1.505	-1.019	-0.987	0.098593	-2	-1	2	4	-1	3	1	1	0	-3	-3	0	-4	-4	-4	0	-1
1	0.85743	-1	-1	-2	1	-6	-1	6	-5	-3	0	-2	1	0	-5	-4	-2	-4	-5	-2	-4	1	0	0	0	1	0.113	-0.837	1.477	1.357	-1.453	0.86491	2	-1	-2	0	-5	0	5	-2	-3	-5	-2	0	-2	-2	-2	-1	-3
1	0	0	0	0	0	0	0	0	0	0	0	0	0	0	0	0	0	0	0	0	0	0	0	0	0	0	0	0	0	0	0	0	0	0	0	0	0	0	0	0	0	0	0	0	0	0	0	0	0
1	0.46437	0	1	3	2	-4	0	2	1	-3	-4	-3	-1	0	0	-4	1	-1	-4	-1	-2	1	0	0	0	1	1.57	-0.146	-0.733	-0.591	-1.302	0.48909	-1	-4	-2	-3	-4	-4	0	-5	-4	1	5	-4	3	1	-4	-4	-1
1	0.077572	1	-5	-5	-6	3	-3	-6	-3	-2	3	3	-5	6	0	-6	-4	-3	-2	-2	2	1	0	0	1	0	1.57	-0.146	-0.733	-0.591	-1.302	0.10345	-2	-1	1	-3	-2	-3	1	-5	-1	-1	1	0	2	5	-4	-1	-1
1	0.26284	3	-2	2	3	-4	0	1	0	-1	-4	-5	0	-3	-5	-3	2	-1	-6	-4	-4	0	0	1	0	1	-0.169	0.933	1.299	0.945	0.828	0.22343	-1	-3	2	6	-5	-2	-2	1	-3	-6	-6	-3	-4	-5	-4	2	-1
1	0.28461	-3	-4	-4	-4	-5	-2	-3	-5	-3	-5	-4	-3	-5	-3	8	-3	-3	-5	1	-5	0	1	0	1	0	0.421	-1.392	-1.628	0.189	2.081	0.27167	-3	2	-5	-5	-3	-3	-4	-5	-2	1	3	-3	6	0	-5	-4	-3
2	0.32429	-2	-2	-1	4	-4	2	6	-4	-2	-5	-5	-1	-4	-5	-4	-1	-1	-5	-4	-4	1	0	0	0	1	0.113	-0.837	1.477	1.357	-1.453	0.23746	-1	-5	-5	-5	-3	-5	-5	-4	-5	6	2	-5	1	-2	-5	-4	-3
2	0.6991	0	0	1	0	-1	0	0	1	0	0	-1	0	-1	0	1	0	0	-1	0	0	0	0	1	1	0	1.045	2.064	1.33	-0.384	1.652	0.65567	0	0	0	0	-1	0	0	0	-1	-1	0	0	-1	-1	2	1	0
2	0.23022	-1	-3	-1	-3	-3	-2	-2	-2	-3	-5	-5	-1	-4	-5	-3	7	0	-5	-4	-4	0	0	1	1	0	0.67	-2.647	-4.76	-0.228	1.399	0.18482	6	-4	-4	-3	4	-3	-4	2	-4	-4	-4	-3	1	-5	-4	-1	-3
2	0.313	0	-1	3	5	-5	-1	1	-3	0	-5	-5	1	-4	-5	1	0	-2	-6	-4	-3	0	0	1	0	1	-0.259	-3.242	-3.656	1.05	0.302	0.26083	2	-1	-2	1	-5	-2	-2	-2	-1	-4	-4	1	-4	-5	6	-1	-1
2	0.80315	1	1	-1	-1	-5	0	-1	1	4	-2	-2	0	1	-5	2	1	0	-5	-2	-2	0	0	1	0	1	0.67	-2.647	-4.76	-0.228	1.399	0.78784	1	1	-2	-2	-5	-1	-4	0	0	1	1	-3	2	0	2	0	-1
2	0.39208	-3	4	-2	-1	-4	-1	0	-4	2	-1	-3	3	-3	-4	-4	-1	3	-5	-3	2	0	1	0	0	1	-0.277	1.648	0.533	1.831	-0.561	0.38825	6	-4	-4	-4	-3	-3	-3	-2	-4	1	-1	-3	-2	-4	-1	-1	0
2	0.27449	0	0	0	2	-1	-2	2	0	-2	-3	-3	-1	-2	-2	5	-1	-2	-5	-4	0	0	0	1	0	1	0.421	-1.392	-1.628	0.189	2.081	0.30935	-1	1	1	1	-5	-1	-3	6	-1	-5	-5	-1	-4	-2	-2	-2	-3
2	0.38251	-1	-1	-3	-2	0	-2	2	-4	0	3	0	-2	-1	-2	-3	-3	-1	-4	-2	4	0	1	0	1	0	0.393	0.816	2.131	-1.239	-0.547	0.39107	-2	-3	-3	-4	-1	-3	-2	-1	-4	3	0	0	-1	-1	-3	-2	0
2	0.090253	0	0	-1	3	-5	3	4	-1	0	-3	-5	0	-3	-3	0	0	-1	-5	-1	-2	1	0	0	0	1	0.113	-0.837	1.477	1.357	-1.453	0.08346	-1	1	-2	2	-5	0	5	-4	0	-3	-3	3	-3	-4	0	-2	-3
2	0.16223	-1	4	-1	-2	-3	3	2	-3	2	-2	0	1	1	-5	-4	0	-2	-1	-2	-2	1	0	0	0	1	0.44	2.897	1.502	1.538	-0.055	0.14837	-3	3	-1	0	-5	1	4	-3	3	-2	-4	2	-2	-2	-1	-2	-1
2	0.05195	2	0	-3	-4	2	-2	-2	-4	-1	3	3	-3	4	1	-3	-3	-2	-2	0	-1	1	0	0	1	0	1.266	-0.912	-1.505	-1.019	-0.987	0.043897	-2	1	-3	-2	3	1	-2	-5	4	1	-1	1	-1	3	-5	-3	-2
2	0.65296	-2	1	-1	-1	-4	4	2	-2	1	-3	-3	0	-2	0	0	0	-2	-1	5	-1	0	0	1	1	0	-0.503	-1.853	-3.005	0.931	-0.179	0.64045	-2	-1	-1	-2	-3	1	0	-2	1	-1	1	1	-2	-1	1	0	1
2	0.75488	-3	-5	-2	-3	1	-5	-4	7	-5	-6	-5	-4	-5	-6	-5	-3	-4	-5	-6	-6	0	0	1	1	0	1.045	2.064	1.33	-0.384	1.652	0.75934	-3	-2	-1	-3	-2	2	0	-5	2	-4	-2	0	0	1	-3	0	5
2	0.78252	-3	-2	-4	-5	-5	-1	-3	-5	0	-3	0	-1	1	5	-3	-3	-3	0	7	-3	0	1	0	1	0	-0.838	1.512	3.097	0.26	0.83	0.78389	0	-1	0	-1	1	0	-1	-2	-4	-1	-1	-2	1	-3	-1	2	4
2	0.91707	-2	-2	-5	-5	10	-4	-3	0	-5	-4	-2	-2	0	-5	-1	-1	-2	-5	-5	-2	0	0	1	1	0	-1.02	-0.255	-0.862	-1.343	0.465	0.91865	-1	-2	3	-2	-4	-1	-2	-1	0	-2	-3	-1	0	-2	-4	3	5
2	0.90804	-3	-1	-3	-4	-5	-1	-2	-2	4	-2	-2	-1	2	4	-5	-2	2	3	5	-3	0	1	0	1	0	0.908	1.313	2.213	-0.032	0.326	0.9066	-3	-3	-4	-5	-2	-2	-3	-4	4	-3	-3	-1	-3	5	-5	-2	-2
2	0.68301	-2	-3	-2	-5	10	-4	-3	-3	-5	-4	-3	-5	-4	-4	-2	-2	0	-4	0	-3	0	0	1	1	0	-1.02	-0.255	-0.862	-1.343	0.465	0.64962	0	0	-2	-1	-5	-1	1	1	0	-4	-3	2	-4	-3	5	0	-2
2	0.0131	-2	-4	-4	-1	1	-3	-4	1	-2	0	1	-4	-3	0	4	1	-2	-2	-3	2	1	0	0	1	0	0.421	-1.392	-1.628	0.189	2.081	0.011114	-2	-4	-4	-2	3	-3	-3	-2	-4	2	3	-4	1	2	-2	0	1
2	0.011114	-2	-4	-4	-2	3	-3	-3	-2	-4	2	3	-4	1	2	-2	0	1	-1	-2	2	1	0	0	1	0	1.266	-0.912	-1.505	-1.019	-0.987	0.009018	-1	-3	-2	-4	1	-4	-4	1	-4	1	4	-4	-2	1	-2	0	1
2	0.009018	-1	-3	-2	-4	1	-4	-4	1	-4	1	4	-4	-2	1	-2	0	1	-1	-2	0	1	0	0	1	0	1.266	-0.912	-1.505	-1.019	-0.987	0.007195	0	-3	-4	-5	0	-3	-3	-1	-1	1	4	-4	-1	1	-1	-2	-1
2	0.27366	3	0	-2	0	-3	-1	3	-2	-3	-2	-2	2	-2	-4	-2	0	0	-4	-4	1	0	0	1	0	1	1.57	-0.146	-0.733	-0.591	-1.302	0.28726	1	-1	0	1	-4	1	0	-2	-1	-2	-4	5	-3	-4	-3	0	-2
2	0.14326	-2	-2	0	0	-5	4	5	-2	2	-2	-3	1	-2	-4	-2	-1	-1	-5	-3	-2	0	1	0	0	1	0.113	-0.837	1.477	1.357	-1.453	0.10364	-1	-2	-1	-2	-4	0	1	-3	-4	-1	-3	1	-3	-4	2	1	5
2	0.032552	6	-3	-2	-3	-2	-2	-3	-3	0	-4	-3	0	-3	-4	-3	1	0	-5	-2	-1	1	0	0	1	0	1.57	-0.146	-0.733	-0.591	-1.302	0.030257	-2	-4	-2	-3	-5	-4	-4	7	-3	-6	-6	-1	-5	-6	-5	-2	-2
2	0.059092	5	-4	-4	-5	1	-4	-4	1	-5	2	0	-4	-1	-3	-4	-2	-1	-5	-3	1	1	0	0	1	0	1.57	-0.146	-0.733	-0.591	-1.302	0.058439	3	-5	-4	-5	5	-4	-4	2	-5	-1	-3	-4	-1	-4	-4	-2	1
2	0.016351	-3	7	-3	-4	-6	-1	-2	-4	-1	-5	-5	4	-4	-5	-4	-3	-3	-5	-4	-5	1	0	0	1	0	-0.277	1.648	0.533	1.831	-0.561	0.017526	6	-4	-4	-4	5	-3	-3	-1	-4	-4	-3	-3	-3	-5	-3	0	-2
2	0.11134	0	-5	-5	-5	-4	-4	-5	-5	-4	2	3	-5	1	6	-5	-3	-3	0	1	-1	1	0	0	1	0	-0.397	0.412	1.891	-1.006	-0.59	0.11935	-2	-1	-1	-2	-5	8	0	-4	1	-1	-2	0	-2	-5	-3	-2	-2
2	0.070464	-2	-4	-3	-3	-4	-4	-4	7	-4	-5	-5	-4	-4	1	-4	-3	-4	4	-3	-4	0	1	0	1	0	1.045	2.064	1.33	-0.384	1.652	0.06281	0	2	0	-1	-2	-1	-1	-4	3	0	-1	2	-1	1	0	-2	1
2	0.12265	-2	1	-3	-4	-4	-1	-2	-5	1	3	1	1	2	-1	-5	-3	-1	-4	1	4	0	1	0	1	0	0.393	0.816	2.131	-1.239	-0.547	0.090298	0	-3	2	-4	2	0	-3	-3	3	3	0	-3	-2	-4	-5	0	0
2	0.61148	-3	-4	-2	-5	-3	-4	-5	-5	-5	4	4	-4	-1	-1	-5	-4	-3	-4	-3	3	0	0	1	1	0	1.266	-0.912	-1.505	-1.019	-0.987	0.61483	-3	-1	-4	-4	-5	-3	-3	-4	-4	-5	-5	-3	-5	-6	8	-3	-3
2	0.18171	-2	-4	-5	-5	-4	-4	-4	-5	-2	2	2	-4	1	0	4	-4	-1	-4	-3	4	1	0	0	1	0	1.242	-1.262	-0.544	-1.337	-0.279	0.19106	-1	-2	-2	-3	2	-2	-3	-1	-4	-3	-4	-3	-3	-4	-2	3	6
2	0.29615	4	1	-3	-4	-4	-3	0	-1	0	-2	-1	-3	-3	-2	-1	0	0	-4	4	-2	1	0	0	1	0	1.57	-0.146	-0.733	-0.591	-1.302	0.30868	-3	0	-2	-1	-6	0	7	-4	1	-6	-5	-1	-4	-5	-3	-2	-3
2	0.43876	-2	3	-1	-4	0	-2	-3	-3	4	-1	-2	-2	-3	3	0	2	0	-3	3	0	0	0	1	0	1	-0.838	1.512	3.097	0.26	0.83	0.3971	-2	4	-1	-2	4	0	-2	-2	0	-4	-4	3	-1	-3	-4	2	1
2	0.82559	2	1	0	-2	-4	-1	2	-2	-1	-4	-4	-2	-4	-1	-2	4	0	-5	-4	-4	0	0	1	0	1	0.67	-2.647	-4.76	-0.228	1.399	0.86255	-3	4	-3	-2	-4	2	-3	-3	-1	-4	-4	0	-3	0	-4	0	0
2	0.52016	1	-2	-1	-4	-2	-3	-2	4	-2	3	0	-3	1	1	-3	-2	-3	2	1	-2	0	0	1	1	0	1.045	2.064	1.33	-0.384	1.652	0.53707	-2	-2	-1	-2	-4	1	-2	-1	-1	-2	-3	-1	-3	-4	-4	3	6
2	0.44932	0	-3	-2	-2	2	1	-1	0	0	2	-1	2	-1	0	1	0	-3	-4	-4	1	0	0	1	1	0	1.57	-0.146	-0.733	-0.591	-1.302	0.469	-3	-4	-3	-1	0	1	-1	-3	-1	0	3	-4	4	1	1	-3	-2
2	0.72591	2	-4	-1	3	-4	-2	-3	-4	-2	1	-1	-2	-1	-4	4	1	2	-5	-4	-1	0	0	1	1	0	0.67	-2.647	-4.76	-0.228	1.399	0.73339	0	-3	-4	-4	-4	-2	-2	-2	-4	0	2	2	-3	1	5	0	-2
2	0.066668	-3	-4	-4	-5	4	-4	-4	-2	3	2	1	-2	-2	-2	-4	-3	0	7	0	3	1	0	0	1	0	-2.128	-0.184	0.672	-0.595	0.009	0.060108	-4	0	-1	-1	1	-1	-3	-4	7	-4	-4	-1	-3	2	-4	0	-3
2	0.37834	0	1	-1	2	-5	2	3	-2	1	-2	-2	3	-1	-4	-3	1	-2	-5	-3	-2	1	0	0	0	1	0.113	-0.837	1.477	1.357	-1.453	0.45448	-1	0	0	-4	-4	0	-2	-3	-3	0	3	3	1	-4	-3	1	-2
2	0.40481	-3	-3	-4	-4	-3	2	-3	-4	-3	2	5	-3	0	2	-4	-3	-3	-3	-2	-1	1	0	0	1	0	0.393	0.816	2.131	-1.239	-0.547	0.41623	-3	-4	-4	-5	1	-4	-4	-1	1	-3	-1	-4	-2	5	-5	-3	-1
2	0.91407	-1	2	-1	1	-3	-1	3	-3	2	-2	-3	-1	-2	-3	0	-2	-1	-4	-3	3	1	0	0	0	1	0.113	-0.837	1.477	1.357	-1.453	0.89985	-2	1	-1	3	-4	2	2	-3	2	-4	-4	3	-3	-4	-3	1	-2
2	0.039098	-4	-5	-6	-6	0	-5	-5	-5	-5	4	5	-5	2	-1	-5	-5	-3	-4	-2	1	0	1	0	1	0	1.266	-0.912	-1.505	-1.019	-0.987	0.034259	-3	-4	-5	-6	-2	-3	-5	-6	0	3	0	-5	0	1	-5	-4	0
2	0.089997	-1	-2	1	3	0	0	0	-2	-2	-3	-3	-1	-1	-5	-4	1	5	-3	-4	-3	0	0	1	0	1	0.908	1.313	2.213	-0.032	0.326	0.080853	0	-1	0	3	-5	0	3	0	-1	-5	-4	1	-4	-4	3	0	-2
2	0.2025	1	0	-1	-1	-1	3	2	-2	-1	-3	-3	-1	-2	-5	-1	3	0	-5	-1	-2	1	0	0	0	1	0.67	-2.647	-4.76	-0.228	1.399	0.16561	1	1	0	1	-2	0	2	-2	-1	-2	-2	1	1	-5	-4	2	-1
2	0.30738	-1	-2	-2	-2	-2	-2	-2	5	-2	-3	-3	-1	-2	-3	-2	3	-1	-2	-2	-2	0	0	1	1	0	1.045	2.064	1.33	-0.384	1.652	0.24311	0	0	-2	-3	7	-2	-3	0	-2	-2	0	1	-1	1	-3	0	1
2	0.43991	0	-2	1	1	0	-3	1	3	1	-4	-4	0	-4	-2	-3	3	0	-4	-4	-3	0	0	1	0	1	1.57	-0.146	-0.733	-0.591	-1.302	0.42683	-2	-3	0	0	-1	0	4	-3	-2	-4	-3	1	-4	-2	5	1	-1
2	0.43197	-2	0	0	4	-3	0	3	-3	1	-1	-4	1	-1	-3	-4	0	1	-1	-2	-1	1	0	0	0	1	-1.474	-0.078	-1.673	0.336	-0.417	0.35639	1	-3	2	2	-3	-3	-3	-3	-3	2	1	-3	3	2	-3	-2	1
2	0.78237	-1	-2	0	0	-2	-2	-1	-2	-3	0	0	-1	2	-1	0	1	1	0	0	2	0	0	1	0	1	1.242	-1.262	-0.544	-1.337	-0.279	0.7835	-1	-1	-1	3	-1	0	3	-2	-1	-2	-2	-1	-1	-2	2	0	-1
2	0.30757	-3	-2	5	4	-2	-2	-1	0	5	-3	-4	-2	-3	-5	-1	1	-2	-5	-3	-3	0	0	1	1	0	0.67	-2.647	-4.76	-0.228	1.399	0.28519	-2	-1	-1	-2	1	-1	-1	-2	0	0	-2	0	-2	-3	4	1	3
2	0.23061	0	2	1	2	-1	-3	-1	-2	-2	-1	0	0	-1	-2	2	-1	-1	-4	3	-1	1	0	0	1	0	0.67	-2.647	-4.76	-0.228	1.399	0.20415	-2	-3	-5	-3	-4	-5	-5	-4	-5	2	5	-4	-1	-1	-3	-3	-4
2	0.9924	2	-2	-2	2	-4	0	6	-1	-2	-4	-4	-1	-3	-5	0	-1	-2	-4	-4	-3	0	0	1	0	1	0.113	-0.837	1.477	1.357	-1.453	0.99234	2	-3	-1	4	-3	-2	-1	-2	-3	-3	-2	-2	-3	-4	-2	4	-1
2	0.21217	-1	2	-1	1	-2	-1	0	-2	0	-2	-1	0	0	4	-2	-1	-2	4	3	-2	0	0	1	1	0	-0.397	0.412	1.891	-1.006	-0.59	0.15144	-1	-4	-2	-2	-3	-3	-2	7	-3	-4	-4	-3	-4	-4	-3	-1	-3
2	0.98249	-1	-1	2	-2	7	-1	-2	-3	-3	-2	0	-2	-2	-3	1	2	0	-3	-3	-2	0	0	1	1	0	-1.02	-0.255	-0.862	-1.343	0.465	0.98304	-1	-3	-3	-3	-3	2	-2	-4	-1	-1	4	-2	-1	-2	4	-3	-2
2	0.31663	1	-1	1	-1	1	-1	0	-2	1	-1	-2	0	1	-1	-1	2	1	-5	1	0	0	1	0	1	0	0.67	-2.647	-4.76	-0.228	1.399	0.30528	1	0	-1	0	4	-1	-2	-3	-5	0	2	1	1	1	-2	-2	-1
2	0.1874	-2	-3	-3	-4	-3	-3	-4	-4	-1	1	-1	-3	9	-1	-4	1	-1	-4	-3	0	1	0	0	1	0	-1.005	1.212	2.219	-0.663	-1.524	0.17181	-3	-5	-5	-5	-4	-4	-5	-5	-4	4	2	-5	1	5	-5	-3	-3
2	0.8898	1	-2	-3	0	1	2	0	5	-4	0	-4	-2	-4	-1	-3	0	-2	-5	-5	-1	0	0	1	0	1	1.045	2.064	1.33	-0.384	1.652	0.87705	-3	-1	-1	7	-6	-1	2	-2	-3	-3	-5	-1	-5	-6	-4	-1	-3
2	0.001205	5	-4	-4	-5	-5	-5	-5	6	-5	-6	-6	-4	-5	-6	-5	-2	-4	-6	-6	-5	1	0	0	1	0	1.045	2.064	1.33	-0.384	1.652	0.001282	2	-5	-6	-6	3	-5	-5	-5	-6	2	4	-5	0	-3	-5	-2	1
2	0.011281	2	3	-4	-3	-4	-3	-3	-4	-4	1	3	-2	-1	-2	-3	1	-3	-4	-1	1	1	0	0	1	0	1.266	-0.912	-1.505	-1.019	-0.987	0.010347	1	-1	-2	-4	-3	-4	-4	-4	-4	2	2	-3	0	4	-4	-1	3
2	0.005474	0	-4	-1	-5	4	-4	-4	1	-5	2	-4	-3	2	-5	-5	3	2	-6	-5	2	1	0	0	1	0	0.67	-2.647	-4.76	-0.228	1.399	0.006064	3	-5	3	0	-5	-4	-4	0	-2	-4	-4	-4	-2	4	-5	1	2
2	0.50031	-1	-1	1	3	-4	0	3	4	-2	-3	-4	-2	2	-3	-2	-2	-2	-4	-2	-2	0	0	1	0	1	-0.259	-3.242	-3.656	1.05	0.302	0.54759	1	-1	-1	2	-1	1	5	-2	-2	-2	-2	-1	0	-3	-1	-2	-1
2	0.98583	-1	0	2	-1	-3	-2	-2	-2	-2	-4	-4	-1	-3	-4	2	5	2	-4	-3	-3	0	0	1	0	1	0.67	-2.647	-4.76	-0.228	1.399	0.98481	-2	-2	-1	6	-4	-2	-1	-1	-3	-2	-4	0	-3	-4	1	1	-2
2	0.044324	-3	-3	0	6	-5	0	4	-3	3	-5	-5	-2	-4	-5	-3	0	-1	-5	-3	-5	0	0	1	1	0	-0.259	-3.242	-3.656	1.05	0.302	0.050546	-3	-1	-1	-3	-2	3	-1	-3	6	-3	0	1	4	-2	-4	-1	3
2	0.03313	4	-4	-4	-5	-3	-4	-4	-4	-5	-1	-3	-4	-3	-4	-4	-2	3	-5	-4	4	1	0	0	1	0	1.57	-0.146	-0.733	-0.591	-1.302	0.030366	6	-4	-4	-4	2	-3	-4	-2	-4	-3	-4	-3	-3	-5	-3	-1	-1
2	0.14804	-3	-5	-6	-6	-4	-5	-5	-6	-6	5	-1	-5	-2	0	-5	-4	-3	-4	-3	6	0	1	0	1	0	1.242	-1.262	-0.544	-1.337	-0.279	0.11204	-4	-5	-6	-6	-4	-5	-5	-6	-1	1	6	-5	0	0	-5	-5	-4
2	0.23145	-2	0	-1	-4	-1	1	-3	-4	-3	-1	3	2	0	1	-1	-2	-3	-1	3	1	0	1	0	1	0	-0.503	-1.853	-3.005	0.931	-0.179	0.19595	0	-1	-3	-2	1	-2	-3	-2	-1	-1	1	-2	1	-2	-2	-2	1
2	0.34032	-2	-2	5	0	-5	-1	-3	4	5	-6	-5	-1	-4	-5	-3	-2	-3	-1	-1	-5	0	0	1	0	1	1.045	2.064	1.33	-0.384	1.652	0.3385	-4	-4	-5	-6	-4	-4	-5	-6	-5	3	4	-4	8	-1	-5	-4	-3
2	0.14084	0	-4	-3	-4	-5	-4	-5	7	-5	-6	-6	-4	-5	-6	-5	-2	-4	-1	-6	-6	0	0	1	1	0	1.045	2.064	1.33	-0.384	1.652	0.16246	6	-4	-2	-4	-3	-3	-4	3	-4	-4	-4	-3	-4	-5	-4	1	-3
2	0.72022	1	0	0	2	-5	1	4	-1	0	-4	-4	1	-3	-5	-4	1	0	-5	-3	-2	0	0	1	0	1	1.57	-0.146	-0.733	-0.591	-1.302	0.72193	2	-3	1	-1	0	-1	0	-1	-1	-2	-3	-1	-2	-3	1	3	1
2	0.19921	-1	-1	-1	2	-3	1	4	-4	1	-3	-2	2	0	-3	-1	-2	1	-5	-2	-1	0	1	0	0	1	0.113	-0.837	1.477	1.357	-1.453	0.2129	-3	-5	-5	-4	-4	-3	-2	-5	-5	5	2	-4	1	1	-3	-4	-2
2	0.84032	0	-2	-2	-2	-3	0	3	-3	-2	-4	-2	1	0	1	-3	4	-1	-4	-3	-3	0	0	1	0	1	0.67	-2.647	-4.76	-0.228	1.399	0.84297	-2	-2	2	-2	-4	-1	1	3	7	-5	-5	1	-3	-4	-4	-2	0
2	0.90294	-2	-3	0	6	-5	-2	2	-1	-3	-4	-4	-3	1	-2	0	1	-2	-5	-4	-2	0	0	1	0	1	-0.259	-3.242	-3.656	1.05	0.302	0.91361	1	-3	1	4	-4	-2	2	2	-3	-2	-4	-2	-3	-4	-3	0	0
2	0.44327	-2	-2	6	-1	-3	-2	-2	0	-2	-1	-2	-1	-3	0	-3	0	-1	3	-3	-3	0	0	1	1	0	-0.169	0.933	1.299	0.945	0.828	0.34677	0	-4	2	-3	7	-1	-3	3	-3	-4	-2	-3	-4	-3	2	0	-3
2	0.68428	-1	0	1	0	-2	-1	-1	-1	-2	-1	0	1	-2	-2	5	0	-1	-2	-2	-1	0	0	1	0	1	0.421	-1.392	-1.628	0.189	2.081	0.6534	-1	-3	-2	-1	8	-1	-2	-1	1	1	0	-2	-2	-1	0	-1	-1
2	0.41948	-3	-3	2	6	0	1	1	-1	-3	-1	-4	-2	-4	-4	-3	-1	0	-4	-4	-3	1	0	0	1	0	-0.259	-3.242	-3.656	1.05	0.302	0.38266	-3	-4	-5	-5	-3	-4	-4	-5	-4	1	6	-4	0	1	-4	-4	-3
2	0.05549	-3	-4	-4	-4	2	-4	-2	-5	-4	2	5	-4	3	1	-4	-4	-3	-3	-3	1	1	0	0	1	0	1.266	-0.912	-1.505	-1.019	-0.987	0.063802	2	-3	0	6	-4	-2	2	-3	-1	1	-4	-2	-3	-4	-3	-2	-1
2	0.54972	-1	-2	-1	0	-1	0	-2	-2	1	-1	-4	-2	-3	-4	-3	5	2	-4	-3	-3	0	0	1	1	0	0.67	-2.647	-4.76	-0.228	1.399	0.53396	0	-3	0	2	-4	0	4	0	-3	-4	-3	0	-3	-4	1	1	1
2	0.57727	1	1	0	-2	-1	0	-2	-1	4	-3	-4	3	-3	-4	-3	2	1	-4	1	-1	1	0	0	0	1	-1.474	-0.078	-1.673	0.336	-0.417	0.58597	-2	-3	-4	-4	-1	-4	-4	-1	-1	0	-1	-2	2	4	-3	1	-1
2	0.39642	-2	2	4	1	-5	5	0	-4	3	-5	-1	1	-3	-5	-4	0	-3	-5	-4	-4	0	0	1	0	1	-0.503	-1.853	-3.005	0.931	-0.179	0.33481	-1	1	1	5	-5	0	3	-1	0	-5	-5	-1	-4	-4	0	0	-2
2	0.047528	-1	0	-2	2	-5	0	6	-1	-2	-5	-5	-1	-4	-5	-3	-1	-3	-5	-4	-4	1	0	0	1	0	0.113	-0.837	1.477	1.357	-1.453	0.053173	-2	-4	2	-4	-1	-3	-4	-3	-4	1	2	-3	0	0	2	2	-1
2	0.56299	0	-4	-4	-4	-3	-4	-4	-4	-4	4	3	-4	4	2	-4	0	0	-4	-3	1	1	0	0	1	0	0.393	0.816	2.131	-1.239	-0.547	0.58031	1	2	-1	1	-1	1	1	0	1	-2	-2	3	-3	-4	-4	0	-1
2	0.094036	-5	-5	-3	-6	-5	-4	-5	-5	-3	-4	-4	-5	0	0	-6	-5	-4	11	6	-4	1	0	0	1	0	-2.128	-0.184	0.672	-0.595	0.009	0.078529	-1	0	0	-3	3	1	-1	-2	3	0	-2	-2	0	-2	-4	1	4
2	0.13929	-3	4	0	-4	-4	1	-2	-4	-2	-2	-2	3	2	4	-4	-3	1	-3	2	-2	0	0	1	0	1	-1.005	1.212	2.219	-0.663	-1.524	0.12823	-3	0	4	5	-5	1	-1	2	1	-5	-5	-2	-4	-4	-4	-1	-3
2	0.67428	1	0	0	1	-4	1	3	-2	0	-3	-2	2	-3	-4	2	0	-1	-5	-4	-3	0	1	0	0	1	0.113	-0.837	1.477	1.357	-1.453	0.69642	0	4	-1	-1	2	-1	-1	-2	0	-2	-1	2	0	-4	-1	0	-1
2	0.76651	2	2	-1	0	-3	-1	-1	-3	3	-2	-2	3	-3	-4	-3	0	2	-4	-3	-2	0	0	1	0	1	1.57	-0.146	-0.733	-0.591	-1.302	0.7574	2	-2	-2	-2	-3	-1	-2	-1	-3	-1	-3	1	1	-3	-3	3	2
2	0.054278	-2	-5	-6	-6	-3	-5	-5	-6	-6	1	-2	-5	-2	-3	-5	-4	-3	-6	-4	7	1	0	0	1	0	1.242	-1.262	-0.544	-1.337	-0.279	0.044763	-3	-2	-3	-1	-6	0	8	-5	-3	-6	-6	-2	-5	-6	-4	-3	-3
2	0.47043	0	0	1	2	-3	1	4	0	0	-3	-3	0	-1	-3	-2	0	0	-4	-3	-2	0	0	1	0	1	0.113	-0.837	1.477	1.357	-1.453	0.54314	-2	-3	-3	-4	-2	-3	-4	-2	-3	4	1	-3	0	5	-3	-3	-2
2	0.41869	2	1	1	2	-3	2	2	-2	0	-4	-3	2	-3	-5	-3	0	-1	-5	-4	-3	0	0	1	0	1	0.113	-0.837	1.477	1.357	-1.453	0.41313	-3	-4	-5	-6	-3	-3	-5	-6	-3	1	4	-3	8	-1	-5	-4	-2
2	0.40782	1	-1	-3	2	-4	3	6	-2	-3	-5	-5	1	-4	-6	-4	-2	-1	-5	-3	-5	1	0	0	0	1	1.57	-0.146	-0.733	-0.591	-1.302	0.39512	-4	-1	-5	-5	-4	3	-4	-6	-4	-1	5	0	-1	3	-5	-4	-2
2	0.014926	-3	-5	-5	-6	-4	-2	-5	-5	-5	3	5	-5	4	-2	-5	-3	1	-5	-4	0	1	0	0	1	0	1.266	-0.912	-1.505	-1.019	-0.987	0.01817	-4	-5	-6	-6	-4	-5	-6	-6	-5	4	5	-5	2	1	-6	-5	-4
2	0.80127	0	0	0	0	-1	0	1	1	0	-1	-1	-1	-1	-1	0	1	0	-1	0	-1	0	0	1	0	1	0.113	-0.837	1.477	1.357	-1.453	0.82378	0	0	0	2	-1	1	1	0	1	-1	-1	-1	-1	-1	0	0	0
2	0.074054	5	-4	-4	-4	-1	-4	-4	-1	-4	-2	-2	-4	-2	-4	-4	2	1	-5	-4	1	1	0	0	1	0	1.57	-0.146	-0.733	-0.591	-1.302	0.060269	-4	-5	-6	-6	-4	-4	-6	-6	-5	0	3	-5	2	7	-6	-5	-4
2	0.049315	-3	-2	-4	-5	-2	-3	-5	-3	-1	-2	1	-3	-1	7	-6	-2	-2	8	-1	-3	0	0	1	1	0	-2.128	-0.184	0.672	-0.595	0.009	0.032599	0	1	0	-2	-2	-1	-1	2	-2	-3	-4	1	-2	-5	-4	4	2
2	0.07287	-2	-3	1	4	-2	-3	-1	-4	1	0	-3	-2	0	0	3	-2	-2	1	5	-3	0	0	1	1	0	-0.838	1.512	3.097	0.26	0.83	0.079466	0	5	-2	-3	-1	1	-2	-4	-3	0	-2	0	-2	-1	4	0	-3
2	0.16375	-3	-5	-5	-6	-3	-5	-5	-6	-5	1	2	-5	-1	-3	-5	-4	-2	-5	-3	6	0	1	0	1	0	1.266	-0.912	-1.505	-1.019	-0.987	0.19524	-1	-1	-1	-4	3	-3	-3	-4	0	-1	-1	1	3	-4	-4	-2	5
2	0.46947	-3	-4	-5	-5	-3	-2	-2	-6	-4	3	4	-4	3	-2	-5	-4	-2	-4	1	2	0	1	0	1	0	0.393	0.816	2.131	-1.239	-0.547	0.4869	-2	-3	-2	-3	1	2	2	-2	0	-1	-3	1	1	-4	0	3	3
2	0.14718	-3	2	-2	-2	-4	-2	1	-5	0	0	1	-1	1	3	-4	-2	-3	-3	2	3	0	1	0	1	0	-0.838	1.512	3.097	0.26	0.83	0.13797	-3	-5	-5	-5	1	-4	-5	-5	-5	5	-1	-4	1	2	1	-4	-1
2	0.53681	-2	0	-1	1	-4	3	3	1	-2	-4	-4	3	-3	-4	0	0	-2	-4	-3	-3	1	0	0	0	1	-0.503	-1.853	-3.005	0.931	-0.179	0.5404	-2	-2	-1	1	2	1	-2	-1	0	0	4	-1	1	-2	-3	-1	0
2	0.71951	-2	0	1	0	0	2	1	-1	-3	1	-3	2	1	-4	-2	3	-2	-2	-3	-3	1	0	0	0	1	0.67	-2.647	-4.76	-0.228	1.399	0.70694	-2	1	0	-1	-3	-2	-1	2	-1	1	0	-2	4	1	-3	-1	0
2	0.39863	-1	1	4	1	-1	0	-1	0	0	-3	-3	1	-1	-2	-4	3	0	-5	-4	-4	0	0	1	0	1	0.67	-2.647	-4.76	-0.228	1.399	0.40152	1	-2	1	2	-4	-1	-1	2	1	-4	-3	-1	-4	-5	-2	3	1
2	0.98757	0	0	-3	-3	-4	-1	0	1	1	-4	-4	-1	-4	-4	6	0	1	-4	-4	-4	0	0	1	0	1	0.421	-1.392	-1.628	0.189	2.081	0.98743	0	2	0	-1	0	3	-2	0	-3	-4	-2	-1	-3	-4	4	1	1
2	0.43995	-1	3	-1	-3	-3	1	1	-4	0	-1	-2	4	0	-1	-4	1	1	-3	-1	0	1	0	0	0	1	-0.277	1.648	0.533	1.831	-0.561	0.42361	-1	1	0	-1	-4	0	1	-2	0	-3	-3	1	-3	-4	6	-1	0
2	0.69666	-2	2	-1	-2	0	3	2	1	1	-2	-1	0	-2	-3	-2	0	0	0	-3	-1	1	0	0	0	1	-0.503	-1.853	-3.005	0.931	-0.179	0.694	1	-2	2	-2	-2	-2	2	-2	-3	-1	-1	-1	-3	-1	0	0	0
2	0.075995	-3	-2	0	0	-4	0	-1	-4	0	-3	-4	-1	-4	-5	7	0	1	-5	-4	-4	0	0	1	0	1	0.421	-1.392	-1.628	0.189	2.081	0.058296	-3	-1	3	3	-4	-2	0	-3	6	-4	-2	-2	-3	-4	2	1	-1
2	0.35897	-1	-4	-3	-3	-5	-4	-3	-4	-5	-5	-5	-3	-5	-6	8	-2	-3	-6	-6	-4	0	0	1	1	0	0.421	-1.392	-1.628	0.189	2.081	0.33225	2	-2	-1	4	-5	0	3	-3	-2	-4	-4	2	-4	-5	-1	1	0
2	0.4705	-2	-5	-5	-5	-4	-2	-3	-6	-5	4	0	-4	0	-2	-3	-3	1	-5	-2	5	0	0	1	1	0	0.393	0.816	2.131	-1.239	-0.547	0.46297	-1	-1	-1	0	-4	-2	-1	-3	-4	-4	-4	-3	-4	-4	2	6	1
2	0.46605	-2	5	2	1	-2	2	-2	-4	4	-4	-4	3	-2	-4	-4	-2	-2	-5	-2	-4	0	0	1	0	1	-1.474	-0.078	-1.673	0.336	-0.417	0.45409	0	-3	-3	-3	-3	-2	-2	-4	-1	-1	-1	-1	-2	5	-4	-1	-1
2	0.41683	-1	0	2	1	-4	-1	0	2	-2	-4	-3	1	0	-4	-3	4	-1	-4	-1	-4	0	0	1	0	1	0.67	-2.647	-4.76	-0.228	1.399	0.38693	-3	2	0	3	-5	0	2	-1	1	-5	-4	3	-4	-5	0	1	-3
2	0.56634	-1	-2	-2	-5	8	-4	-5	-5	-5	-2	2	-4	-1	-4	5	-2	-3	-5	-3	-2	0	0	1	1	0	-1.02	-0.255	-0.862	-1.343	0.465	0.47415	2	-1	-3	-5	-3	-3	-4	-4	-2	2	1	-3	-1	0	-4	0	1
2	0.33093	-1	-1	1	-1	1	1	0	4	-3	-4	-2	1	0	1	-3	-1	-2	-3	-2	-2	0	0	1	0	1	1.045	2.064	1.33	-0.384	1.652	0.30654	-3	-1	2	5	-2	-1	1	-3	-1	0	-1	1	1	-4	-3	-1	-2
2	0.64181	1	-1	1	-1	1	0	-1	2	1	-1	-1	-1	1	0	-1	-1	-1	4	0	-1	0	0	1	0	1	1.57	-0.146	-0.733	-0.591	-1.302	0.67605	-1	-1	1	-2	0	2	-1	-2	3	-1	-3	1	2	0	1	2	-1
2	0.49711	-1	0	0	0	3	1	0	-1	2	0	-1	0	2	1	0	-1	0	-5	1	-1	0	1	0	1	0	0.67	-2.647	-4.76	-0.228	1.399	0.48161	-1	0	-4	0	3	-4	0	-1	-4	0	-1	0	2	1	0	0	0
2	0.21352	2	-2	2	-3	2	0	-2	-3	-2	0	-4	-3	-1	0	6	-1	-3	-4	-3	-3	0	0	1	1	0	0.421	-1.392	-1.628	0.189	2.081	0.23192	-3	-3	-6	-6	1	-5	-3	-4	-5	1	5	-5	2	5	-6	-5	-2
2	0.2447	-1	1	-3	-3	1	3	0	-2	1	0	0	3	3	-4	-3	-1	-1	-4	-3	-1	1	0	0	0	1	-0.503	-1.853	-3.005	0.931	-0.179	0.28631	-2	0	4	2	-4	0	1	1	3	-4	-4	-2	0	-4	-3	2	-2
2	0.1001	-4	-5	-6	-6	-4	-5	-6	-6	-6	7	2	-5	-1	-3	-5	-5	-3	-5	-4	3	0	1	0	1	0	0.393	0.816	2.131	-1.239	-0.547	0.094203	-3	6	-4	-5	-3	-2	-3	-5	-3	-2	3	-1	0	-2	-5	-3	-2
2	0.1962	2	-3	-2	-3	-2	-2	-2	-2	-3	-2	0	-2	-2	-3	-2	2	5	-4	-3	-2	1	0	0	1	0	0.908	1.313	2.213	-0.032	0.326	0.2169	0	-4	-4	-5	-2	-4	-4	-4	-4	3	1	-4	-1	2	-4	-3	-2
2	0.3299	-1	-4	-4	-5	3	-4	-4	-5	-4	5	1	-4	4	-2	-4	-3	0	-4	-3	2	1	0	0	1	0	0.393	0.816	2.131	-1.239	-0.547	0.29698	3	-3	-2	-3	-3	-2	-3	2	-3	-3	-3	-2	2	-4	-3	3	3
2	0.083068	0	-2	0	4	1	-1	0	0	-1	-3	-4	-1	-1	-5	-3	1	4	0	-2	-3	0	0	1	0	1	1.57	-0.146	-0.733	-0.591	-1.302	0.07736	0	-1	0	3	-6	0	2	0	0	-5	-4	2	-1	-3	2	0	-1
2	0.19476	0	1	0	0	-3	3	3	-1	1	-4	-3	0	-3	-5	-2	2	-1	-5	-2	-3	1	0	0	0	1	0.113	-0.837	1.477	1.357	-1.453	0.13723	1	1	0	1	-2	0	2	-3	-1	-2	0	2	0	-2	-4	1	0
2	0.045997	-3	-4	-5	-5	-2	-4	-5	-5	-5	2	5	-5	0	-1	-4	-3	-1	-4	-3	3	0	1	0	1	0	1.266	-0.912	-1.505	-1.019	-0.987	0.031691	-2	-2	-2	4	-3	-3	-2	-3	0	-1	-3	0	-2	0	-3	-2	-2
2	0.23937	-1	-1	-2	-3	-3	-4	-4	7	-4	-5	-6	-2	-5	-5	-4	-1	-2	-5	-5	-3	0	0	1	1	0	1.045	2.064	1.33	-0.384	1.652	0.24672	-3	4	-3	-1	-4	0	-1	-3	-1	0	2	1	-1	2	-4	-2	-3
2	0.37688	-2	-2	-3	-3	-4	-3	-3	-2	-3	1	3	-1	6	-1	-1	-2	-2	-4	0	2	0	0	1	1	0	1.266	-0.912	-1.505	-1.019	-0.987	0.28192	0	1	2	1	-3	3	0	-1	2	-4	-4	1	0	-5	-2	2	1
2	0.13654	1	-5	-5	-5	3	-4	-5	-5	-5	0	-1	-4	-1	-2	-4	-3	-2	-5	-1	6	0	1	0	1	0	1.242	-1.262	-0.544	-1.337	-0.279	0.12461	6	-4	-4	-4	-2	-3	-3	-2	-4	-4	-4	-3	-3	-4	-1	0	-2
2	0.32993	-2	-5	-5	-5	-3	-5	-5	-4	-5	6	2	-5	1	-2	-5	-4	-2	-5	-3	2	1	0	0	1	0	1.266	-0.912	-1.505	-1.019	-0.987	0.30565	-2	3	-1	-2	-4	5	0	-4	-2	2	1	0	-1	-3	-4	-1	-2
2	0.88542	-3	-4	-4	-5	-4	-3	-4	-5	-4	-1	1	-4	10	-2	-5	-4	-3	-4	-3	-1	0	0	1	0	1	-1.005	1.212	2.219	-0.663	-1.524	0.902	-3	-2	6	0	-4	-1	-2	-2	2	-5	-5	3	-4	-5	-4	3	-2
2	0.056708	-4	8	-3	-5	-1	1	-3	-4	1	-6	-5	-1	-4	-6	-5	-3	-4	-2	-4	-6	0	1	0	1	0	0.44	2.897	1.502	1.538	-0.055	0.066551	-4	-6	-6	-6	-3	-5	-6	-7	-6	6	2	-5	0	0	-6	-5	-4
2	0.009863	-1	0	-4	-4	0	-3	-3	-5	1	3	-2	-1	0	-3	-5	-1	1	-2	2	5	0	1	0	1	0	1.242	-1.262	-0.544	-1.337	-0.279	0.012046	-2	-5	-3	-4	-3	-5	-5	7	-5	-6	-6	-4	-5	-6	-5	-3	-4
2	0.13902	3	-3	0	-4	-2	-2	-4	-3	-3	-2	-3	-3	-1	-3	5	0	1	-5	-2	0	1	0	0	1	0	0.908	1.313	2.213	-0.032	0.326	0.10563	-5	-5	-5	-6	-5	-3	-5	-6	-2	0	-2	-5	0	7	-6	-4	-4
2	0.016768	-3	-5	-6	-6	-3	-2	-5	-5	-6	4	3	-5	2	-1	-5	-3	-1	-5	-4	4	0	1	0	1	0	1.242	-1.262	-0.544	-1.337	-0.279	0.014211	-3	-2	6	6	-6	-3	-2	-2	-2	-6	-6	-2	-5	-2	-3	0	-2
2	0.40116	4	-4	2	-3	-4	1	-3	0	-4	-2	0	-3	-3	-4	1	1	-1	-5	-4	-1	1	0	0	1	0	1.57	-0.146	-0.733	-0.591	-1.302	0.38289	-1	-3	-3	-1	-4	-3	-4	-3	-2	0	1	-3	8	-3	-1	-1	3
2	0.6948	-1	-1	1	2	-1	2	4	-4	4	-1	-3	-1	-4	0	-1	-1	0	0	-1	-2	0	0	1	0	1	-0.503	-1.853	-3.005	0.931	-0.179	0.69149	-1	-4	-5	-5	-4	-4	-1	-5	0	2	3	-4	2	1	4	-4	0
2	0.052741	-1	-1	1	4	-6	2	4	-4	0	-5	-4	1	-4	-6	-3	0	-2	-6	-5	-3	1	0	0	0	1	0.113	-0.837	1.477	1.357	-1.453	0.047412	4	-3	-4	-4	3	-4	-4	-1	-4	-2	-1	-4	-1	-3	-2	2	2
2	0.65479	-2	-3	1	7	-4	-2	0	-1	-2	-4	-3	-1	-4	-5	1	-2	-2	-5	-4	-4	0	0	1	0	1	-0.259	-3.242	-3.656	1.05	0.302	0.60996	-1	-4	-2	-3	-4	-3	-3	6	-3	-5	-5	-3	-4	-2	1	0	-3
2	0.033324	-3	-5	-5	-5	-3	-4	-5	-5	-5	3	3	-4	-1	-2	-5	-4	-2	-5	-3	6	0	1	0	1	0	1.266	-0.912	-1.505	-1.019	-0.987	0.035714	-3	4	-2	-3	-5	-1	-1	-4	-1	-5	-4	7	-3	-5	-3	-2	-3
2	0.5034	-1	0	1	-1	-2	2	1	-1	-2	-1	-1	0	1	-2	-1	-1	2	-2	-2	2	0	0	1	0	1	0.908	1.313	2.213	-0.032	0.326	0.55791	-1	-1	-1	2	-2	1	3	-1	-1	-1	-1	1	1	-2	-1	0	-1
2	0.87232	0	1	-1	0	-2	0	-2	-4	0	-3	-2	-1	-1	-5	6	2	0	-6	-2	-3	0	0	1	0	1	0.421	-1.392	-1.628	0.189	2.081	0.88049	0	-1	-1	1	1	-1	0	2	-2	-5	-5	2	-5	-6	-2	4	-2
2	0.95221	0	2	-1	-3	0	-3	0	5	0	-4	-3	0	-4	-4	1	-3	-3	-4	-1	-1	0	0	1	1	0	1.045	2.064	1.33	-0.384	1.652	0.95054	-1	4	-2	-3	-4	2	0	1	1	-4	-3	3	-3	-4	1	0	-2
2	0.73381	-1	0	0	0	-4	-2	2	-2	-1	-3	0	3	1	0	2	0	1	-4	-3	-2	0	0	1	0	1	-0.277	1.648	0.533	1.831	-0.561	0.71529	-1	0	0	1	-2	1	4	-2	4	-3	-3	0	0	-3	1	0	-1
2	0.061886	4	-4	-4	-4	1	-4	-4	1	-1	2	-1	-4	-2	-2	-4	-2	-3	-4	-1	3	1	0	0	1	0	1.266	-0.912	-1.505	-1.019	-0.987	0.059245	1	2	-1	3	-4	2	3	-4	0	-3	-4	1	-2	-4	-3	1	-1
2	0.041691	1	0	2	1	-4	1	0	3	2	-5	-5	-1	-4	-5	-2	1	0	-5	-4	-2	0	0	1	0	1	-0.169	0.933	1.299	0.945	0.828	0.035545	-2	-1	1	4	-5	2	1	3	-3	-4	-5	-1	-5	-6	2	1	-1
2	0.040196	1	-4	-5	-5	-4	-3	-3	-3	-5	1	2	-4	-2	2	1	-3	1	-4	-2	4	1	0	0	1	0	1.266	-0.912	-1.505	-1.019	-0.987	0.03983	-1	0	-5	-5	-1	-1	-4	-5	-4	0	3	-4	2	3	-1	-4	-2
2	0.1574	-2	-4	-4	-5	-1	-4	-4	-5	-4	3	2	-4	4	-1	-4	-1	-3	-4	1	4	0	0	1	1	0	1.266	-0.912	-1.505	-1.019	-0.987	0.14161	-1	0	-2	0	-4	-3	-1	6	-3	-4	-3	-3	-4	-4	-3	-1	-2
2	0.084034	-3	-4	-5	-5	-3	-4	-5	-6	-4	2	6	-4	2	0	-5	-4	-3	-3	-1	-1	1	0	0	1	0	1.266	-0.912	-1.505	-1.019	-0.987	0.088049	3	1	-2	-2	-3	0	3	-3	-3	-4	-4	3	-3	-3	-3	0	1
2	0.40638	1	-2	-1	3	-4	1	5	-3	-2	-2	-4	-1	-3	-5	-3	-1	0	-5	-4	-3	1	0	0	0	1	0.113	-0.837	1.477	1.357	-1.453	0.37729	2	0	-2	1	-4	5	3	-1	0	-4	-4	0	-3	-5	-3	-1	-2
2	0.18408	-3	-4	-4	-6	-2	-5	-6	-6	-5	1	6	-5	0	3	-5	-4	-4	-2	-2	-1	0	0	1	1	0	1.266	-0.912	-1.505	-1.019	-0.987	0.19106	0	2	2	-2	1	1	-1	0	-1	-3	-1	1	-1	-1	-4	4	-2
2	0.75655	-2	-4	6	-3	-5	-3	-3	-4	-3	-3	-6	-3	-2	-6	-3	5	-1	-7	-5	-5	0	0	1	0	1	0.67	-2.647	-4.76	-0.228	1.399	0.76331	-3	0	-2	-4	-4	4	0	-4	-2	-3	2	2	-1	-4	0	3	-1
2	0.31761	-1	1	2	1	0	2	-1	-1	3	-2	-3	2	-2	0	-1	0	-1	-3	-3	-2	0	0	1	0	1	1.266	-0.912	-1.505	-1.019	-0.987	0.33414	-3	-5	-4	-4	-4	-3	-4	-5	-4	4	4	-4	0	1	0	-4	-3
2	0.27809	1	0	-1	-2	0	1	-1	-1	2	0	2	-1	0	-3	-3	0	-1	-2	1	0	1	0	0	0	1	1.266	-0.912	-1.505	-1.019	-0.987	0.29971	-3	-5	-6	-5	-5	-5	-5	-6	-4	2	6	-6	1	0	-6	-4	-3
2	0.29432	-2	-3	-1	-4	9	-1	-2	-4	-3	-2	-1	-1	-3	-1	0	2	1	-2	0	-2	0	0	1	1	0	-1.02	-0.255	-0.862	-1.343	0.465	0.2762	-1	2	2	-2	-4	-1	-1	-1	2	-2	-2	3	-3	-2	-2	1	2
2	0.22463	-4	-5	-6	-7	-4	-3	-5	-6	-5	1	6	-6	0	1	-5	-5	-4	-5	-4	0	0	0	1	1	0	1.266	-0.912	-1.505	-1.019	-0.987	0.23026	0	2	1	0	0	0	0	1	2	-4	-4	0	-2	-3	-4	3	-2
2	0.21792	-2	1	-2	-3	8	0	-4	-3	-2	-2	0	1	-3	-2	0	1	1	-5	0	-4	0	0	1	1	0	0.67	-2.647	-4.76	-0.228	1.399	0.19748	1	1	2	-4	-2	0	-1	-1	3	-2	-4	2	-2	-2	-3	2	3
2	0.073094	-4	-5	-6	-6	-2	-4	-5	-6	-6	2	6	-5	1	0	-5	-5	-4	-5	-3	-1	0	0	1	1	0	0.393	0.816	2.131	-1.239	-0.547	0.073388	-1	2	1	-2	0	0	0	1	2	-3	-3	-1	-1	-3	-4	3	-2
2	0.28842	1	0	-4	-6	0	-5	-5	-4	-4	1	2	-4	3	1	-6	-3	-2	1	-3	4	1	0	0	1	0	-2.128	-0.184	0.672	-0.595	0.009	0.2874	1	3	-1	-3	-4	1	2	-4	-1	0	-1	3	-1	-4	-2	1	-1
2	0.19913	-3	0	-3	-3	8	-2	-3	-3	0	-1	-1	-1	-2	-2	0	1	2	-4	0	-3	0	0	1	1	0	-1.02	-0.255	-0.862	-1.343	0.465	0.19505	1	1	1	-2	-1	2	-3	-2	1	-3	-2	3	-2	-4	-1	2	2
2	0.093944	-1	2	2	2	-5	2	1	-1	1	-5	-4	3	-3	-2	-1	0	-2	-6	-3	-3	0	1	0	0	1	0.44	2.897	1.502	1.538	-0.055	0.098119	-4	-5	-6	-4	1	-6	-4	-7	-5	5	4	-6	1	0	-3	-5	-3
2	0.24184	-1	-1	-1	-4	8	-2	-2	-4	-3	-3	-2	-1	-3	-2	1	2	1	-5	-3	-3	0	0	1	1	0	0.67	-2.647	-4.76	-0.228	1.399	0.20828	0	1	1	-4	-3	1	-2	-3	2	-3	-1	3	-2	-3	-3	2	2
2	0.045194	2	-5	-5	-6	-3	-4	-5	-5	-5	3	3	-5	1	-3	-5	-4	-2	-5	-4	4	1	0	0	1	0	1.242	-1.262	-0.544	-1.337	-0.279	0.041537	1	-4	-3	-4	6	-3	-4	-4	-4	0	-2	-4	0	-4	-4	2	4
2	0.18332	-3	3	-3	-3	-3	2	-2	-4	-2	-2	3	4	1	-4	-4	-2	-3	-4	-2	-1	1	0	0	0	1	0.44	2.897	1.502	1.538	-0.055	0.17668	0	-4	-4	-5	1	-4	-4	-4	-4	2	4	-4	-1	-2	-4	-3	-1
2	0.63217	-3	-2	-2	0	-5	-1	7	-4	-2	-4	-4	-1	-4	-4	-3	-2	-3	-4	-4	-4	0	1	0	1	0	0.113	-0.837	1.477	1.357	-1.453	0.66969	-1	-3	-2	-3	0	-2	-3	2	-3	-3	-3	-3	-3	-4	-3	1	6
2	0.099638	-1	-1	-4	-3	-4	-4	-4	-4	-2	-1	-1	-4	-1	8	-4	-4	-4	4	1	-2	1	0	0	1	0	-0.397	0.412	1.891	-1.006	-0.59	0.11579	-2	0	0	0	-2	6	2	-1	0	-4	-3	0	0	-3	-3	-1	-2
2	0.46751	1	-2	-1	-2	-3	-1	0	2	-2	1	-1	1	-1	-2	-3	3	0	-4	-1	0	1	0	0	0	1	0.67	-2.647	-4.76	-0.228	1.399	0.44173	3	0	2	-3	-3	2	-1	-2	5	-3	-2	0	1	-1	-3	0	-2
2	0.98858	1	-1	0	-1	-1	-1	-1	-1	-1	-3	-3	-1	-2	-3	-1	5	1	-3	-2	-2	0	0	1	0	1	0.67	-2.647	-4.76	-0.228	1.399	0.98878	-1	-4	-3	-4	10	-4	-4	-3	-4	-2	-2	-4	-2	-3	-3	-1	-1
2	0.98928	1	-1	-1	1	-1	-1	-1	4	-1	0	-2	-1	-1	-2	-1	0	-1	-2	-2	-1	0	0	1	0	1	1.57	-0.146	-0.733	-0.591	-1.302	0.98938	0	-3	-1	-1	-3	-2	-2	6	-2	-4	-4	-2	-3	-3	-2	-1	-2
2	0.98994	0	-1	0	3	-1	-1	0	0	-1	0	-1	-1	-1	0	-1	0	-1	-1	-1	1	0	0	1	0	1	1.242	-1.262	-0.544	-1.337	-0.279	0.99021	1	-1	0	-1	-1	-1	-1	-1	-1	-3	-3	-1	-2	-3	-1	5	2
2	0.99186	-1	-4	-3	-4	10	-4	-4	-3	-4	-2	-2	-4	-2	-3	-3	-1	-1	-3	-3	-1	0	0	1	1	0	-1.02	-0.255	-0.862	-1.343	0.465	0.99249	-1	1	-1	-1	-3	0	0	-1	-1	-3	-3	5	-2	-3	-2	0	2
2	0.99624	-1	-4	-3	-4	10	-4	-4	-3	-4	-2	-2	-4	-2	-3	-3	-1	-1	-3	-3	-1	0	0	1	1	0	-1.02	-0.255	-0.862	-1.343	0.465	0.99612	1	-1	0	-1	-1	-1	-1	-1	-1	-3	-3	-1	-2	-1	-1	5	1
2	0.99566	-1	-1	-2	-2	-3	-2	-2	-3	0	-3	-3	-1	-3	-4	8	-1	-2	-4	-3	-3	0	0	1	0	1	0.421	-1.392	-1.628	0.189	2.081	0.9954	0	-3	-3	-4	-1	-3	-3	-2	-4	2	1	-3	2	-1	-1	-2	-1
2	0	0	0	0	0	0	0	0	0	0	0	0	0	0	0	0	0	0	0	0	0	0	0	0	0	0	0	0	0	0	0	0	0	0	0	0	0	0	0	0	0	0	0	0	0	0	0	0	0
2	0.99501	0	-3	-1	-1	-3	-2	-2	6	-2	-4	-4	-2	-3	-4	-3	1	-2	-3	-4	-4	0	0	1	0	1	1.045	2.064	1.33	-0.384	1.652	0.99473	-1	-4	-3	-4	10	-4	-4	-2	-4	-2	-2	-4	-2	-3	-3	-1	-1
2	0.99293	-1	-3	-4	-4	-2	-3	-3	-4	-4	4	1	-3	0	-1	-3	-3	-1	-3	-2	4	0	0	1	1	0	0.393	0.816	2.131	-1.239	-0.547	0.9928	-1	-4	-3	-4	10	-4	-4	-3	-4	-2	-2	-4	-2	-3	-3	-1	-1
2	0.009226	4	-4	1	-4	0	-4	-4	-1	-4	-1	-3	-4	-3	-4	-4	0	-1	-5	-4	4	0	1	0	1	0	1.242	-1.262	-0.544	-1.337	-0.279	0.008472	-2	-5	-5	-5	-3	-5	-5	-6	-5	4	0	-5	1	-3	-3	-4	2
2	0.057533	-4	-4	-3	-5	-4	-4	-4	-5	7	3	3	-5	-2	4	-5	-2	-2	-4	-2	-1	1	0	0	1	0	0.393	0.816	2.131	-1.239	-0.547	0.078891	7	-4	-4	-4	-3	-3	-4	-2	-4	-4	-4	-3	-4	-5	-3	-1	-3
2	0.016302	0	-2	-3	-4	3	-4	-3	-3	-3	0	-1	-2	-2	-4	-4	0	5	-3	-3	3	0	1	0	1	0	1.242	-1.262	-0.544	-1.337	-0.279	0.013205	-2	-3	5	-3	-3	-3	-4	-3	-3	2	-3	-4	-2	-5	-5	3	1
2	0.001536	-3	0	-3	-3	-6	-1	-2	-4	-3	-6	-5	8	-4	-6	-4	-3	-2	-6	-5	-5	1	0	0	1	0	-0.277	1.648	0.533	1.831	-0.561	0.001515	-4	-3	8	1	-6	-3	-3	-3	0	-6	-6	-3	-5	-6	-5	-2	-3
2	0.14664	-4	-4	-4	0	-4	-3	-4	-5	-1	-3	-3	-4	-3	5	-5	-4	-3	0	8	-3	0	1	0	1	0	-0.397	0.412	1.891	-1.006	-0.59	0.15596	-1	-2	0	0	-5	1	6	-4	-3	-2	-4	-2	0	-5	-3	2	2
2	0.58551	-2	0	1	3	0	0	1	-1	-4	-4	-3	-1	-4	-5	0	2	4	-5	-2	-4	1	0	0	0	1	0.908	1.313	2.213	-0.032	0.326	0.61637	2	-2	1	4	-5	2	2	-4	-4	-4	0	-3	-4	-5	-4	1	-1
2	0.50186	0	1	1	-3	4	-3	-3	0	-3	-3	0	-3	3	2	-4	1	1	-3	2	-3	0	0	1	1	0	-0.397	0.412	1.891	-1.006	-0.59	0.49749	1	2	-3	-3	-3	-2	-3	-3	-3	2	1	1	-2	2	-3	1	1
2	0.5005	0	-2	0	-1	-4	0	1	-2	2	0	-1	0	-3	-4	-4	1	3	4	-2	0	0	0	1	1	0	0.908	1.313	2.213	-0.032	0.326	0.50247	2	1	-1	4	-4	-2	3	-2	-3	-3	-2	0	1	-4	-2	0	-2
2	0.36825	0	0	0	-2	3	0	-2	-2	-1	-3	-2	-2	1	3	2	2	0	-4	2	-2	0	0	1	1	0	0.67	-2.647	-4.76	-0.228	1.399	0.34341	-1	-1	-2	0	-5	-1	0	-3	-4	-2	-3	-2	-4	-5	7	0	-1
2	0.20243	0	-1	2	-1	-5	3	-2	-2	8	-2	-3	-1	-4	0	-5	0	-4	-5	0	-5	0	1	0	1	0	-0.169	0.933	1.299	0.945	0.828	0.28189	-5	-5	-6	-6	0	-5	-6	-6	1	0	1	-6	3	7	-6	-5	-4
2	0.75501	-1	0	-1	1	-2	0	-1	-1	0	0	-1	0	-2	1	3	0	2	1	-1	-1	0	0	1	0	1	0.908	1.313	2.213	-0.032	0.326	0.72378	0	0	0	-2	0	0	-1	-1	-1	-1	0	1	-2	2	2	-1	0
2	0.1743	5	-4	-4	-4	-3	-3	-3	-2	-4	0	-3	-3	-3	-4	-3	-1	-1	-4	-4	3	0	1	0	1	0	1.242	-1.262	-0.544	-1.337	-0.279	0.14096	-3	-5	-5	-5	-4	-4	-5	-5	-4	2	1	-5	3	7	-3	-4	-2
2	0.3308	-2	-1	2	1	-4	1	1	-2	-3	-3	-3	-1	0	-3	3	2	0	0	1	-3	0	0	1	0	1	0.67	-2.647	-4.76	-0.228	1.399	0.32725	-2	-4	-2	-5	-4	-2	-2	-2	-5	4	1	-2	4	-2	-2	-1	-2
2	0.26028	2	-2	2	-1	1	1	0	-2	-1	-2	-1	-1	-1	-2	-4	3	1	-5	0	-2	1	0	0	0	1	0.67	-2.647	-4.76	-0.228	1.399	0.23453	-3	-4	-2	-5	-4	-2	-5	-5	0	0	5	-2	5	0	-5	-3	0
2	0.23453	-3	-4	-2	-5	-4	-2	-5	-5	0	0	5	-2	5	0	-5	-3	0	-4	-1	-1	1	0	0	1	0	1.266	-0.912	-1.505	-1.019	-0.987	0.2268	-1	-3	5	4	-5	2	-1	-4	4	-5	-3	-1	-4	-5	0	-1	-1
2	0.54883	-1	-1	0	-4	2	2	-4	-2	-4	1	0	-4	-3	1	-1	-4	-1	-4	0	4	0	1	0	1	0	1.242	-1.262	-0.544	-1.337	-0.279	0.5308	-1	-1	1	-4	-4	0	-2	0	0	-4	-2	-1	0	-1	-1	3	2
2	0.68961	0	2	-2	-2	0	1	-1	-1	0	-2	-2	0	-3	0	4	1	-1	1	-1	-2	0	0	1	0	1	1.045	2.064	1.33	-0.384	1.652	0.69238	-1	0	2	0	-4	3	3	0	-1	-4	-1	2	-1	-4	-1	0	1
2	0.99395	0	0	-2	1	0	-1	2	-1	-1	0	0	-1	-1	1	0	-1	1	-5	-4	1	0	0	1	0	1	-0.397	0.412	1.891	-1.006	-0.59	0.99407	1	-1	-2	1	-2	0	2	-2	-1	-1	-1	3	-2	-1	-1	0	0
2	0.9836	-2	2	2	1	-5	0	2	0	-2	-1	-3	2	-1	-5	-1	1	2	-5	-4	-2	0	0	1	0	1	-0.169	0.933	1.299	0.945	0.828	0.9841	0	-1	-2	0	-5	-1	3	1	-2	-1	-3	3	-4	-2	2	-1	-1
2	0.99795	0	-4	-1	0	2	1	2	-2	1	-2	-3	-1	0	-4	-1	2	2	-5	0	-1	0	0	1	0	1	0.908	1.313	2.213	-0.032	0.326	0.99801	2	-1	-3	-1	-4	0	0	0	-4	-1	-1	-1	0	-4	1	2	2
2	0.98166	0	-1	-3	-1	-4	2	1	-4	5	-2	-4	1	0	-1	0	1	3	-4	-3	-1	0	0	1	0	1	-0.503	-1.853	-3.005	0.931	-0.179	0.98097	-2	-3	-1	5	-4	-2	4	-1	-3	-2	-2	-2	0	-4	0	-1	0
2	0.046167	-2	-5	-3	-4	-5	-2	-5	7	-5	-6	-6	-4	-5	-6	-5	-3	-4	-5	-6	-6	0	1	0	1	0	1.045	2.064	1.33	-0.384	1.652	0.033579	-2	-4	-2	-3	-4	-3	-3	-3	-4	-5	-4	-3	-4	-5	0	7	-1
2	0.059017	-3	-1	2	-1	0	-1	-2	-5	-2	1	4	-2	3	-1	-2	-4	-3	-5	-4	0	1	0	0	0	1	-0.169	0.933	1.299	0.945	0.828	0.058088	0	1	0	3	-1	1	3	-1	2	-2	-5	0	-4	-3	-3	0	-2
2	0.27482	-4	-5	-2	-6	-4	-3	-5	-6	-1	0	5	-5	2	5	-4	-5	-4	-3	-1	0	1	0	0	1	0	1.266	-0.912	-1.505	-1.019	-0.987	0.23604	0	1	-1	3	-5	3	4	-1	-2	-5	-4	-1	-2	-5	-1	-1	-2
2	0.24942	-4	4	-4	-5	-2	-3	-4	-6	2	3	0	3	-1	1	-5	-4	-2	-5	1	2	0	1	0	0	1	1.266	-0.912	-1.505	-1.019	-0.987	0.23944	-4	4	-3	-4	-5	0	1	-5	1	2	1	3	-1	-2	-5	-2	-3
2	0.1297	-1	-5	-4	-6	-2	-4	-5	-5	-6	4	2	-4	3	-1	-3	-4	-2	-5	-3	5	1	0	0	1	0	1.242	-1.262	-0.544	-1.337	-0.279	0.083857	2	1	0	-2	-3	0	2	-1	-1	-3	0	2	0	-3	-3	-1	1
2	0.20935	-2	2	3	4	-4	-1	0	-3	3	-3	-3	0	-2	0	-1	-1	-1	0	-2	-3	0	0	1	0	1	-0.259	-3.242	-3.656	1.05	0.302	0.17952	3	-4	-4	-4	4	-4	-4	-2	-4	3	0	-3	1	1	-3	-2	0
2	0.26506	-2	-1	1	-2	-4	1	-1	0	0	2	1	-1	1	-4	-1	-1	2	-4	1	0	1	0	0	1	0	0.393	0.816	2.131	-1.239	-0.547	0.22059	-1	-1	2	1	-5	1	1	-1	0	0	0	0	1	1	-1	-1	0
2	0.28591	4	-4	-1	-4	6	-3	-3	-2	-5	-2	-1	-3	-3	-3	2	-1	0	-5	-4	0	0	0	1	1	0	-1.02	-0.255	-0.862	-1.343	0.465	0.23891	1	-2	1	4	-5	-2	-1	1	-3	-5	-1	-1	-3	-5	2	2	0
2	0.14185	1	-3	-3	-3	4	-3	1	-4	-3	1	-2	-3	3	2	-4	1	1	-3	3	1	0	1	0	1	0	1.242	-1.262	-0.544	-1.337	-0.279	0.14874	-2	-5	-1	-5	-4	-5	-5	-2	0	6	0	-5	1	2	-5	-4	0
2	0.274	5	-4	-4	-4	0	-3	-3	-3	-4	-1	-4	-3	-3	-5	5	0	-2	-5	-4	0	0	0	1	1	0	1.57	-0.146	-0.733	-0.591	-1.302	0.20735	-4	0	-2	-3	-5	-2	-2	-4	10	-6	-5	-1	-4	-4	-3	-3	-4
2	0	0	0	0	0	0	0	0	0	0	0	0	0	0	0	0	0	0	0	0	0	0	0	0	0	0	0	0	0	0	0	0	0	0	0	0	0	0	0	0	0	0	0	0	0	0	0	0	0
2	0.27017	-3	-2	-1	-3	-5	-2	-2	0	10	-5	-5	-3	-4	-3	-4	-2	-4	-5	0	-5	0	0	1	1	0	-1.474	-0.078	-1.673	0.336	-0.417	0.23076	-4	1	-2	-3	2	-2	-2	-4	10	-5	-5	-2	-4	-3	-4	-3	-4
2	0.19333	0	-2	-3	-4	-5	-4	-5	7	-5	-6	-6	-4	-5	-6	-5	-3	-4	-5	-6	-5	0	1	0	1	0	1.045	2.064	1.33	-0.384	1.652	0.17819	-4	-2	9	-1	-5	-2	-3	-3	-2	-6	-6	-3	-5	-6	-5	-2	-2
2	0.26973	4	-3	-2	-3	-2	-2	-1	3	0	-2	1	0	0	-3	-3	0	-2	-5	-2	-1	0	0	1	1	0	1.57	-0.146	-0.733	-0.591	-1.302	0.26177	0	-2	-1	1	-4	0	1	-2	-1	-1	-1	2	-1	-4	2	1	0
2	0.17455	-1	2	1	3	-4	0	0	4	-2	-5	-5	0	-4	-5	1	-1	-1	-5	-5	-5	0	0	1	0	1	-0.259	-3.242	-3.656	1.05	0.302	0.16323	0	-2	-1	0	-1	-1	-1	0	-2	-4	-4	1	-4	-4	3	4	2
2	0.048311	-4	-5	-6	-6	-2	-5	-6	-6	-6	7	2	-5	1	-2	-5	-5	-3	-5	-4	3	0	1	0	1	0	0.393	0.816	2.131	-1.239	-0.547	0.044156	-4	-5	-6	-6	-4	-5	-6	-6	-6	4	4	-5	0	1	-5	-5	-3
2	0.13359	-2	-3	4	-3	2	-3	-3	-4	-3	-3	-4	-3	-2	-5	-4	-1	7	-5	-4	-3	0	0	1	1	0	-0.169	0.933	1.299	0.945	0.828	0.14744	-3	6	4	-3	-5	1	-2	-4	-2	-5	-5	4	-2	-5	-4	-2	-1
2	0.07043	-1	-3	-2	-3	-3	-2	-2	-3	-3	-5	-5	-2	-4	-5	-3	7	0	-5	-4	-4	0	0	1	1	0	0.67	-2.647	-4.76	-0.228	1.399	0.059854	7	-4	-4	-4	-3	-3	-3	-2	-4	-4	-4	-3	-3	-5	-3	-1	-2
2	0.38669	-1	-1	-3	-3	-3	-2	-1	0	-3	-2	-1	2	7	-3	0	2	1	-4	-3	-2	0	0	1	1	0	0.67	-2.647	-4.76	-0.228	1.399	0.36753	-2	1	-3	-4	-4	-3	-2	-4	1	3	2	-3	-2	-1	2	-2	-1
2	0.11175	0	-4	-4	-4	4	-4	-4	2	-4	0	3	-4	1	2	-4	-3	-3	-3	-2	1	0	0	1	1	0	1.57	-0.146	-0.733	-0.591	-1.302	0.10074	2	-3	-2	-3	-2	-3	-3	-3	-3	0	-1	-3	-2	-3	-3	1	5
2	0.26192	-1	0	-1	2	2	2	1	-3	-3	0	-1	0	6	-3	-3	-1	-2	-4	-3	0	1	0	0	1	0	0.113	-0.837	1.477	1.357	-1.453	0.25599	3	-3	-3	-3	-3	-2	2	-2	-3	1	-3	1	-3	-3	-3	1	-1
2	0.22685	-2	-5	-5	-5	-1	-4	-5	-5	-1	4	4	-4	0	-3	-2	-3	0	-5	-4	3	1	0	0	1	0	1.266	-0.912	-1.505	-1.019	-0.987	0.20608	-2	0	0	3	-5	2	4	-4	0	-3	-3	-1	-4	0	-4	2	-2
2	0.36037	-1	3	-1	0	-4	-3	-2	2	0	-4	-3	-2	-4	-4	4	0	3	-5	-4	-4	1	0	0	0	1	1.045	2.064	1.33	-0.384	1.652	0.3657	1	-1	-2	3	0	2	3	-3	0	-4	-4	2	-4	-5	1	1	0
2	0.22488	0	1	-3	1	-4	2	1	0	-3	1	0	1	-3	-3	-3	1	-3	-4	2	-3	1	0	0	1	0	0.113	-0.837	1.477	1.357	-1.453	0.21101	-1	0	1	3	-5	2	2	-4	2	-1	-4	0	-4	-4	1	0	0
2	0.53945	-1	1	0	0	0	0	0	-1	-1	1	0	2	-1	-1	-1	0	-1	-2	0	0	1	0	0	0	1	1.242	-1.262	-0.544	-1.337	-0.279	0.45335	0	0	0	0	-2	0	-1	0	-2	-2	-1	4	-1	0	-1	0	-2
2	0.26633	1	1	-2	-3	-3	-2	1	-3	-3	-3	-1	-2	1	-4	-3	2	5	-4	-4	-2	1	0	0	1	0	1.57	-0.146	-0.733	-0.591	-1.302	0.3105	-1	0	-3	0	-5	1	3	-4	3	-4	-4	-2	-3	-1	-4	-3	-3
2	0.92921	1	-1	-2	-3	-3	-1	-2	0	1	-1	3	-1	1	0	-1	2	-1	-4	-2	0	0	0	1	1	0	1.266	-0.912	-1.505	-1.019	-0.987	0.91347	-1	-3	-2	5	-4	-2	0	0	-3	-1	2	-2	-1	0	-2	0	-2
2	0.76305	-1	2	-1	-1	-4	1	0	-2	-1	-3	-3	6	-2	-4	-2	-1	-1	-4	-3	-3	1	0	0	0	1	-0.277	1.648	0.533	1.831	-0.561	0.76418	-2	-3	-4	-4	-2	-3	-4	-4	-3	1	5	-3	1	2	-4	-3	-2
2	0.10135	-4	-5	-5	-6	-4	-5	-5	-6	-5	2	5	-5	0	4	-5	-5	-3	-3	-2	0	1	0	0	1	0	-0.397	0.412	1.891	-1.006	-0.59	0.11911	-4	-4	3	7	-6	-3	0	-3	-3	-6	-6	-3	-5	-6	-4	-1	-3
2	0.76944	-3	1	-3	-3	-4	1	0	-4	-2	-2	-3	1	-3	4	-4	-2	1	-1	7	-3	0	0	1	1	0	0.44	2.897	1.502	1.538	-0.055	0.71001	1	-2	-2	1	-4	0	-2	2	-2	-4	-3	-2	-3	-4	6	-1	0
2	0.20341	-2	-2	-4	-2	0	-1	-4	-5	-1	0	3	2	3	-4	-4	0	4	-5	-1	0	0	0	1	1	0	0.67	-2.647	-4.76	-0.228	1.399	0.21795	-4	0	-1	4	-6	2	5	-4	1	-6	-6	1	-5	-5	-2	-1	-1
2	0.85123	0	-1	0	1	-4	0	2	-2	0	-4	-3	1	-3	-4	-3	4	1	2	-3	-2	0	0	1	0	1	0.67	-2.647	-4.76	-0.228	1.399	0.79544	-2	-1	0	3	-4	1	1	-1	2	-1	-1	0	-3	-2	-1	2	0
2	0.94126	-1	-3	-2	0	-3	-2	1	2	-3	-1	2	-2	-1	3	-3	0	0	-3	-2	-2	0	0	1	0	1	0.393	0.816	2.131	-1.239	-0.547	0.94469	-1	-1	-1	1	-3	3	4	1	1	-3	-3	1	-2	-3	1	0	-2
2	0.95089	1	-2	1	-1	2	-1	0	0	-2	-2	-2	-1	-2	-2	2	4	-1	-2	-2	-2	0	0	1	1	0	0.67	-2.647	-4.76	-0.228	1.399	0.94848	1	0	-1	1	-2	1	2	-2	-2	0	-2	0	-2	-2	1	2	2
2	0.007668	-5	-6	-6	-6	-4	-6	-6	-6	-2	-3	-2	-6	-3	9	-6	-5	-5	-2	1	-3	0	1	0	1	0	-0.397	0.412	1.891	-1.006	-0.59	0.006627	2	-3	-3	-4	3	-3	-3	-3	-4	-1	-4	-3	-3	-5	-4	6	1
2	0.33253	0	-2	-4	-4	1	1	-1	-4	-4	-3	1	-3	-3	-4	7	-3	-3	-5	-4	0	0	1	0	1	0	1.266	-0.912	-1.505	-1.019	-0.987	0.38191	-4	-2	-1	-3	-5	-1	-2	-4	10	-5	-5	-1	-4	-3	-4	-3	-4
2	0.27231	0	-2	0	4	-5	1	5	-2	-3	-5	-5	1	-4	-6	-1	-2	-2	-5	-5	-5	1	0	0	0	1	0.113	-0.837	1.477	1.357	-1.453	0.30127	3	-4	-2	-3	-3	-2	3	-3	-4	2	-2	-3	-3	-4	-4	2	2
2	0.9184	-2	-2	3	5	0	1	1	-2	1	-2	-3	-1	0	-6	0	1	-2	-6	-5	-2	1	0	0	0	1	-0.259	-3.242	-3.656	1.05	0.302	0.91517	-1	-1	2	0	1	0	-1	2	1	-1	0	-1	-4	0	-5	0	2
2	0.33059	5	-5	-4	-5	3	-4	-1	-4	-5	0	-3	-4	-3	-5	-3	1	0	-5	-5	3	1	0	0	1	0	1.242	-1.262	-0.544	-1.337	-0.279	0.32582	-4	1	-2	0	0	2	4	-3	5	-1	0	0	-1	-2	-5	-1	-2
2	0.71479	-1	-2	5	1	-4	-1	3	0	0	-4	-4	-1	-4	-5	-3	1	2	-5	-4	-4	0	0	1	0	1	-0.169	0.933	1.299	0.945	0.828	0.64667	-2	3	3	-2	-1	0	-2	-1	1	-4	-2	4	-3	-4	1	0	0
2	0.04935	-3	-3	6	3	-5	0	-1	1	-2	-5	-5	-2	-4	-5	-3	0	-1	-6	-4	-3	0	0	1	1	0	-0.169	0.933	1.299	0.945	0.828	0.044561	0	-5	-5	-4	-3	-4	-4	-5	-5	3	-1	-4	0	-3	-1	-1	-1
2	0.16376	-2	6	1	-3	-6	0	2	-5	-3	-5	-3	4	-4	-3	-4	-2	-3	-5	-4	-2	1	0	0	0	1	0.44	2.897	1.502	1.538	-0.055	0.22756	-1	-1	-5	-5	-4	0	-2	-5	2	2	2	-3	1	-1	-5	-2	0
2	0.61081	-1	2	0	2	-2	0	3	-3	3	-1	-3	-1	0	-5	3	-1	0	-5	-4	-3	0	0	1	0	1	0.113	-0.837	1.477	1.357	-1.453	0.65169	0	-2	0	-1	-4	-1	1	4	-4	-2	-2	-2	-4	0	2	1	-1
2	0.78701	0	-1	-2	1	0	0	1	-2	-4	0	-2	0	0	0	3	1	0	-4	-1	1	1	0	0	0	1	0.113	-0.837	1.477	1.357	-1.453	0.78312	-2	-2	1	4	-1	1	2	-1	-1	-1	-3	-1	0	-4	0	0	-1
2	0.44953	-3	5	-3	-4	2	1	-1	-4	1	-5	-4	5	0	-4	-4	-1	-1	-5	-3	-3	0	1	0	1	0	-0.277	1.648	0.533	1.831	-0.561	0.38745	-3	-6	-6	-6	-4	-5	-6	-6	-6	7	-1	-5	-1	-3	-5	-5	-3
2	0.081802	-2	2	1	1	-5	2	5	-4	-1	-2	-4	-1	-3	0	-4	-2	-2	-4	2	0	1	0	0	0	1	-0.503	-1.853	-3.005	0.931	-0.179	0.062149	1	1	-2	-3	-4	2	0	0	-2	-3	1	1	2	2	-4	0	-1
2	0.016745	-3	-4	-5	-5	-2	-4	-4	-5	-4	2	5	-4	0	2	-4	-4	-3	-3	-2	2	0	0	1	1	0	1.266	-0.912	-1.505	-1.019	-0.987	0.017986	5	-3	-3	-3	1	-3	-3	-1	-3	-3	-3	-3	-3	-4	-3	2	3
2	0.48509	-3	-3	-3	-4	-4	-3	-4	-5	-3	0	-2	1	-2	7	3	-4	-3	-2	1	0	0	0	1	0	1	-0.397	0.412	1.891	-1.006	-0.59	0.51857	-2	3	-2	-3	-1	5	-1	-4	0	-1	-3	3	0	-4	-3	-2	2
2	0.14152	3	-5	-4	-5	9	-4	-4	-4	-5	-2	-3	-4	-3	-4	-4	-2	0	-5	-4	2	0	0	1	1	0	-1.02	-0.255	-0.862	-1.343	0.465	0.106	-1	-4	-2	-3	-4	-3	-3	4	-4	0	-4	-3	-4	-3	-4	5	-2
2	0.13661	-3	-1	5	3	-5	-1	4	-2	-2	-5	-5	-2	-4	-5	-2	-1	-1	-5	-4	-5	0	0	1	0	1	-0.169	0.933	1.299	0.945	0.828	0.14066	-3	-1	6	1	-1	-1	0	-2	2	-5	-5	0	-1	-5	-3	0	2
2	0.28852	-3	-4	-5	-5	-1	-4	-5	-5	-5	2	3	-4	5	-2	-5	-4	-3	-4	-3	4	0	1	0	1	0	-1.005	1.212	2.219	-0.663	-1.524	0.25067	-3	-2	-4	-4	-4	4	-2	-4	-1	3	4	-2	-1	-2	-4	-3	-2
2	0.99975	2	-2	-3	-1	-4	0	4	-4	-3	-5	-4	1	-4	-4	4	-1	-3	-4	0	-4	0	0	1	0	1	0.113	-0.837	1.477	1.357	-1.453	0.99975	0	-2	-2	0	-4	0	3	-1	-3	-4	-4	1	-3	-5	2	1	3
2	0.16352	-1	-2	-1	1	-4	-4	-4	6	-4	-5	-5	-3	-4	-5	0	0	0	-5	-5	-5	0	0	1	1	0	1.045	2.064	1.33	-0.384	1.652	0.14023	-3	-1	-2	0	-5	8	-1	-4	2	-4	-4	0	-3	-5	-3	-2	-1
2	0.45689	-1	-2	0	-1	0	-1	0	-1	-1	-2	1	-1	-1	-2	4	-1	-1	-2	-2	0	0	0	1	0	1	0.421	-1.392	-1.628	0.189	2.081	0.53855	-1	0	2	-1	-2	1	0	0	1	-2	0	3	-1	-2	-1	0	-1
2	0.22799	0	-5	-5	-6	0	-5	-5	-5	-5	3	4	-5	2	2	-2	-1	-1	-5	-3	3	0	1	0	1	0	0.393	0.816	2.131	-1.239	-0.547	0.2411	0	2	-1	-4	-5	0	0	-3	-1	-2	-1	4	-4	0	-4	-1	3
2	0.18567	-4	-5	-6	-4	1	-2	-4	-4	-2	2	3	-5	5	2	-6	-3	-1	4	-3	2	0	1	0	1	0	1.266	-0.912	-1.505	-1.019	-0.987	0.15829	-2	2	0	0	1	1	1	-3	2	-2	-1	1	0	-3	-1	0	3
2	0.29379	2	0	-2	-3	-3	1	-1	-3	-3	2	-1	1	1	-3	-3	0	2	-4	-1	-1	0	0	1	0	1	0.908	1.313	2.213	-0.032	0.326	0.29016	1	-4	-4	-4	1	-3	-4	-4	-4	3	1	-3	-1	-2	-4	-2	-1
2	0.068964	-2	-4	-4	-5	-3	-4	-4	0	1	-4	-3	-4	-3	3	-5	-2	-4	6	8	-4	0	1	0	1	0	-2.128	-0.184	0.672	-0.595	0.009	0.056362	1	2	-2	-1	-3	3	3	2	-1	-5	-4	2	-3	-5	-4	-2	-3
2	0.16512	-2	-5	-5	-6	-3	-5	-5	-6	-6	0	0	-5	-1	-3	-5	-4	-2	-5	-4	7	0	1	0	1	0	1.242	-1.262	-0.544	-1.337	-0.279	0.16387	-2	-5	-5	-5	2	-4	-5	-6	-5	5	1	-5	-1	0	-5	-3	2
2	0.42911	-2	-4	-3	-3	-4	-4	-4	7	-4	-5	-5	-4	-4	-5	-4	-2	-4	-5	-5	-1	0	0	1	1	0	1.045	2.064	1.33	-0.384	1.652	0.42565	-2	-4	-4	-4	-4	-3	-3	-4	-4	-4	1	-2	-3	-4	8	-1	-3
2	0.02253	1	0	0	2	-2	0	1	0	-2	-4	-4	3	-3	-5	3	-1	-2	-5	-4	-3	0	0	1	0	1	-0.277	1.648	0.533	1.831	-0.561	0.024719	-1	-1	2	4	-4	2	2	1	-1	-4	-4	1	-4	-5	-3	0	-1
2	0.05835	-2	-1	-1	0	-4	0	6	-3	-2	-4	-3	2	-3	-4	-2	-1	-1	-3	-3	-3	0	1	0	1	0	0.113	-0.837	1.477	1.357	-1.453	0.05481	-1	-3	-3	-2	-3	-2	-2	-3	-3	-3	-3	-2	-3	-4	7	-1	1
2	0.18918	3	-4	-4	-1	-2	-2	-1	-3	-3	3	-1	-3	-1	-4	1	-1	-1	-4	-4	4	0	0	1	1	0	0.393	0.816	2.131	-1.239	-0.547	0.15719	-1	-3	2	2	-1	-1	1	-1	-2	-3	-2	0	2	-5	-4	3	3
2	0.41102	0	0	1	3	-4	0	1	-3	-2	-1	-3	0	-3	-1	4	0	-1	-4	-4	-2	0	0	1	0	1	0.44	2.897	1.502	1.538	-0.055	0.32222	-2	-1	0	1	-3	-2	0	2	6	-4	-3	-1	-4	2	-3	0	1
2	0.090498	-3	0	-1	-3	-4	-1	-3	-3	0	2	3	-1	-1	3	-1	-2	0	-1	1	1	1	0	0	1	0	1.266	-0.912	-1.505	-1.019	-0.987	0.095265	1	-2	0	2	-3	1	4	-2	-1	-3	-3	0	-2	-4	0	1	0
2	0.22215	0	1	0	-2	-1	0	2	-2	-1	-3	-2	4	-1	-5	-4	-1	2	-5	-4	-2	0	1	0	0	1	-0.277	1.648	0.533	1.831	-0.561	0.16035	0	0	2	0	-1	-2	0	-2	-1	1	-3	-1	-3	-4	-3	-1	0
2	0.34061	-3	0	-1	-1	-5	0	-2	-5	8	-1	-1	-2	-4	1	-2	-1	-2	-4	3	-2	1	0	0	1	0	-1.474	-0.078	-1.673	0.336	-0.417	0.29455	0	-1	-3	-2	-4	-1	-3	-4	-4	2	3	-1	0	1	-2	0	-1
2	0.16375	-2	-4	-5	-5	-2	-2	-4	-6	-5	5	0	-1	-1	-2	-5	-3	-2	0	1	5	0	1	0	1	0	-0.838	1.512	3.097	0.26	0.83	0.13254	-2	-5	-5	-6	0	-5	-5	-3	-5	-1	5	-5	0	5	-5	-3	-3
2	0.034953	2	-4	-4	-5	1	-4	-4	-2	-4	2	4	-4	1	-1	-4	-1	-1	-4	-3	1	1	0	0	1	0	1.266	-0.912	-1.505	-1.019	-0.987	0.031069	-2	0	-3	-3	-5	1	-1	-4	-1	-3	-2	6	1	-2	-2	-2	-1
2	0.05719	-2	0	-3	-5	-4	-1	-4	-4	-5	3	2	-2	-1	4	-2	-3	-2	0	-1	3	1	0	0	1	0	1.242	-1.262	-0.544	-1.337	-0.279	0.064806	1	-3	-1	3	-5	2	4	-3	-1	-3	-4	0	-2	-4	2	0	-1
2	0.98297	-1	0	-2	1	7	-2	-1	-1	-2	-1	-3	-2	-2	-3	3	2	-1	-3	1	-2	0	0	1	1	0	-1.02	-0.255	-0.862	-1.343	0.465	0.98498	2	-2	-1	-2	-2	-2	-2	3	-2	-3	-3	-2	-2	-3	3	2	0
2	0.99077	-1	3	-2	-2	-4	0	0	1	-2	-2	1	3	1	-3	-2	0	-1	-2	-2	-2	1	0	0	0	1	0.44	2.897	1.502	1.538	-0.055	0.99108	-1	2	1	1	0	-1	1	-2	-2	-2	-3	4	1	-4	-2	1	-2
2	0.98261	-1	-2	0	2	-4	0	4	-2	-2	-2	-2	0	-2	-4	0	2	1	-5	-4	-3	0	0	1	0	1	0.113	-0.837	1.477	1.357	-1.453	0.98053	-2	-1	3	3	-4	0	1	2	-1	-4	-3	0	2	-3	-1	-1	0
2	0.97524	0	-2	0	-3	-4	-3	-2	-2	-4	1	-1	0	2	1	3	1	2	-4	-3	0	0	0	1	0	1	1.57	-0.146	-0.733	-0.591	-1.302	0.97386	-2	5	0	-3	-5	1	1	-1	0	-2	-2	3	-2	-1	-2	-2	0
2	0.91839	-1	-1	2	-2	-3	-2	1	-4	-3	2	0	-1	-2	-3	0	-1	2	-5	-3	3	1	0	0	1	0	1.242	-1.262	-0.544	-1.337	-0.279	0.91374	-3	-3	4	5	-4	-2	2	-1	-1	-3	-2	-2	-4	-1	-3	1	0
2	0.76912	-1	0	2	-1	3	-2	0	0	-3	-1	-2	1	-2	1	1	0	-2	-4	2	-1	0	0	1	0	1	-0.277	1.648	0.533	1.831	-0.561	0.72988	1	1	1	0	-4	1	2	1	-2	-1	-2	-1	-2	0	-3	2	-2
2	0.4233	1	2	2	1	-5	1	1	-2	1	-3	-2	1	-1	-5	-1	1	1	-5	-2	-2	0	0	1	0	1	-0.169	0.933	1.299	0.945	0.828	0.50451	-1	0	1	-3	-5	1	2	-3	1	1	-1	3	2	-2	-1	2	-2
2	0.74736	-2	2	-1	-1	3	1	-1	-3	-3	-3	-2	4	-4	1	1	0	-1	-5	-3	0	0	0	1	0	1	-0.277	1.648	0.533	1.831	-0.561	0.71977	-2	0	3	1	-1	1	0	-1	-1	-3	-3	-1	-2	-3	0	1	3
2	0.39641	-1	0	0	0	-5	1	0	-1	2	0	-1	0	2	1	0	-1	0	4	1	-1	0	0	1	0	1	1.266	-0.912	-1.505	-1.019	-0.987	0.37945	-1	2	-1	-1	3	3	1	0	0	-2	-2	2	1	-2	-1	-1	-1
2	0	0	0	0	0	0	0	0	0	0	0	0	0	0	0	0	0	0	0	0	0	0	0	0	0	0	0	0	0	0	0	0	0	0	0	0	0	0	0	0	0	0	0	0	0	0	0	0	0
2	0.4197	-4	-4	-2	-5	-5	-4	-5	-2	0	-2	-1	-5	-3	5	-5	-4	-4	2	8	-4	0	1	0	1	0	-0.838	1.512	3.097	0.26	0.83	0.3923	-1	3	0	-1	-2	1	-1	-1	-1	-2	0	4	-1	-4	-4	0	-2
2	0.21655	-2	5	0	-1	-4	4	0	-1	-1	-4	-3	1	0	-3	-3	-1	-1	2	-1	-4	1	0	0	0	1	0.44	2.897	1.502	1.538	-0.055	0.23145	-1	5	2	-3	-4	1	-2	-2	-1	-4	-2	0	-1	3	-4	1	0
2	0.15751	1	-4	-3	-4	-1	-4	-4	6	-3	-4	-3	-4	-4	-4	-4	1	-3	0	-5	-2	1	0	0	1	0	1.045	2.064	1.33	-0.384	1.652	0.17486	4	-3	-3	-4	-2	-3	-3	3	-1	-2	-2	-3	-3	0	-4	-1	-3
2	0.48812	-3	-4	-3	-5	-4	-4	-4	-4	-5	3	3	-4	3	2	3	-1	0	-4	-3	1	0	0	1	1	0	0.393	0.816	2.131	-1.239	-0.547	0.38443	-2	-5	-2	-3	-5	-4	-3	7	-4	-6	-5	-4	-5	-5	-4	-1	-3
2	0.03373	-4	-4	-5	-6	-4	-4	-5	-4	-4	0	4	-5	4	5	-6	-2	-4	-3	4	-2	1	0	0	1	0	-0.397	0.412	1.891	-1.006	-0.59	0.037238	3	-4	-3	-4	-4	-3	-3	4	-1	-4	-4	-1	-4	-5	-4	3	-2
2	0.24772	-2	-5	-3	-4	-5	-4	-4	7	-4	-6	-6	-4	-5	-5	-4	-2	-4	-2	-5	-5	0	0	1	1	0	1.045	2.064	1.33	-0.384	1.652	0.25865	2	-4	-4	-4	-2	-4	-4	-2	-4	0	-3	-3	-3	-4	5	-2	3
2	0.3796	0	-4	-4	-5	-3	-3	-4	-4	3	0	-1	-3	0	3	-3	-3	-1	-3	2	5	0	0	1	0	1	1.242	-1.262	-0.544	-1.337	-0.279	0.4114	2	2	4	-2	0	-1	-2	-2	6	-3	-4	-1	-3	-2	-4	-1	-2
2	0.2954	-3	-2	4	7	0	-2	0	-4	-2	-4	-6	-2	-5	-6	-4	-1	-3	-6	-3	-5	0	0	1	0	1	-0.169	0.933	1.299	0.945	0.828	0.24909	-2	-5	-2	-5	-5	-4	-4	-4	-5	3	0	-4	0	-3	7	-3	0
2	0.33038	7	-4	-4	-5	-3	-4	-4	-2	-5	-4	-4	-4	-4	-5	-4	-1	-3	-5	-5	-3	1	0	0	1	0	1.57	-0.146	-0.733	-0.591	-1.302	0.32874	-4	7	-3	-3	-6	-1	-2	-5	-2	-6	-5	5	-4	-6	-4	-3	-4
2	0.02996	-3	-3	-3	-5	-4	-4	-4	-5	-4	1	3	-2	-2	-2	6	-3	-2	-5	-3	1	0	0	1	1	0	-0.277	1.648	0.533	1.831	-0.561	0.020899	-1	-5	-5	-5	-2	-4	-5	-5	-5	2	-1	-4	0	-3	-5	-3	-1
2	0.04622	-2	3	-1	-2	-1	0	0	2	1	-4	-3	1	-1	-1	-2	0	-3	-2	5	-4	0	0	1	0	1	-0.838	1.512	3.097	0.26	0.83	0.043383	-2	-2	6	3	-2	1	0	-3	0	-4	-4	2	-2	-4	-3	1	-1
2	0.21101	6	-4	-4	-5	1	-3	-4	-3	-3	-1	-2	-2	-2	-2	-4	-1	-3	-1	4	0	0	0	1	1	0	1.57	-0.146	-0.733	-0.591	-1.302	0.23526	-3	-5	-6	-6	0	-5	-5	-6	-6	0	-1	-5	-2	-3	-5	-4	-3
2	0.23679	-2	-4	-5	-5	-4	-3	-2	-6	-5	4	0	-4	0	-3	-4	-4	1	-5	-3	5	0	0	1	0	1	0.908	1.313	2.213	-0.032	0.326	0.23074	-1	-2	0	0	-4	-2	-1	-3	-3	-5	-5	-3	-4	-5	0	6	0
2	0.079497	-2	-5	-5	-5	-1	-3	-5	-4	-5	2	3	-4	4	3	-3	-1	0	-2	-3	1	1	0	0	1	0	1.266	-0.912	-1.505	-1.019	-0.987	0.056571	-2	-5	-5	-6	-2	-4	-5	-6	-5	1	3	-5	5	5	-4	-3	-2
2	0.43538	-4	-4	-5	-6	-5	-4	-5	-6	-1	-4	-4	-5	-4	1	-6	-4	-4	0	10	-4	0	0	1	0	1	-0.838	1.512	3.097	0.26	0.83	0.44471	0	1	-2	-3	-4	1	2	-4	-1	-1	-1	3	-1	-4	-4	-2	4
2	0.87508	-1	-2	-1	-2	1	-2	0	-3	0	0	-2	0	-2	-3	5	1	2	-4	-3	0	0	0	1	1	0	0.421	-1.392	-1.628	0.189	2.081	0.85565	-1	-1	-1	-2	4	0	0	-1	-3	-2	-2	2	-1	-3	2	1	-1
2	0.68358	2	-2	-1	0	-3	-1	3	-2	-2	0	-1	-1	0	0	-3	2	1	-4	-1	-1	0	1	0	1	0	0.67	-2.647	-4.76	-0.228	1.399	0.6667	0	-3	-2	-3	8	-3	-1	3	-2	-4	-4	-2	-3	-4	-3	2	-2
2	0.60044	-2	-2	-4	-5	8	-4	-4	-4	-2	1	-1	-4	-1	3	-4	-3	-3	-1	5	0	0	0	1	1	0	-1.02	-0.255	-0.862	-1.343	0.465	0.59654	-1	3	-1	-2	-4	-1	0	3	-2	-3	-2	1	-3	0	-3	0	1
2	0.56961	-2	3	-2	-3	-3	0	-2	-3	-3	1	-1	-1	1	-3	6	0	-2	-4	-3	0	0	0	1	0	1	0.44	2.897	1.502	1.538	-0.055	0.5635	0	-3	-2	-3	-2	-2	-3	1	-2	2	1	-2	-1	-1	-3	2	-1
2	0.99944	3	-2	0	-2	-4	1	2	-1	-2	-4	-2	4	-3	-4	3	-2	-2	-4	-4	-2	0	0	1	0	1	1.57	-0.146	-0.733	-0.591	-1.302	0.99922	1	-3	-2	1	-4	1	2	-4	-3	-3	-1	3	-3	-4	3	-1	0
2	0.31861	1	-2	-2	-2	-5	2	-2	6	-1	-5	-4	0	-3	-5	-4	0	-2	-5	-3	-3	0	0	1	0	1	1.045	2.064	1.33	-0.384	1.652	0.27231	-3	-1	-2	-3	-5	8	0	-4	0	-3	-4	-1	-3	-5	-2	-1	-3
2	0.031295	-1	2	-1	-1	-5	2	4	-3	0	-5	-4	4	-4	-5	1	0	-1	-5	-4	-4	0	0	1	0	1	0.113	-0.837	1.477	1.357	-1.453	0.029178	-3	-1	4	2	-2	0	-1	-4	8	-4	-2	-1	-3	-4	-4	-1	-1
2	0.51877	1	0	-1	1	-5	2	4	-2	-3	-1	-1	1	-4	-5	-2	-1	0	-5	-2	-2	1	0	0	0	1	0.113	-0.837	1.477	1.357	-1.453	0.46588	0	3	0	-1	-1	0	0	-2	-1	-4	-2	5	0	-2	-4	-1	-1
2	0.69609	0	0	-3	-3	-5	-2	-2	3	1	-5	-5	5	-4	-6	-4	2	1	-6	-5	-5	0	0	1	0	1	-0.277	1.648	0.533	1.831	-0.561	0.69525	0	-3	2	-3	-5	1	-3	-1	8	-5	-5	-3	-4	-2	-2	-1	4
2	0.11239	1	-3	-3	-3	0	-3	-1	-3	-3	2	0	-3	-1	-2	-2	-2	-2	-3	-3	5	0	1	0	1	0	1.242	-1.262	-0.544	-1.337	-0.279	0.094316	-2	2	2	0	-3	0	3	-3	-2	-2	-3	4	-3	-3	-2	-1	1
2	0.085969	-2	-3	0	-3	-2	-1	-3	-2	2	2	2	-3	0	3	-2	-2	-2	-2	2	1	0	1	0	1	0	1.266	-0.912	-1.505	-1.019	-0.987	0.052516	-1	-4	-4	-4	-1	-4	-4	-4	-3	1	2	-4	0	1	-4	-1	-2
2	0.020366	0	-5	-5	-5	-3	-2	-4	-5	-5	2	0	-4	-1	-2	-4	-4	-1	-5	-1	6	0	1	0	1	0	1.242	-1.262	-0.544	-1.337	-0.279	0.014086	-3	-3	2	0	-4	1	4	-3	0	-1	1	1	4	-2	-4	-2	-2
2	0.097259	1	1	0	0	-5	0	1	-1	2	-3	-4	5	-4	-5	-1	1	-2	-5	-3	-5	0	1	0	0	1	-0.277	1.648	0.533	1.831	-0.561	0.0802	-1	-2	2	3	-5	-1	0	3	0	-6	-6	1	-2	-6	0	2	1
2	0.1401	1	1	-3	-3	-5	1	0	-3	-4	-1	-2	6	-2	-2	-4	-1	-3	1	-2	-3	0	1	0	1	0	-0.277	1.648	0.533	1.831	-0.561	0.14547	-3	-5	-6	-4	-3	-5	-5	-6	-6	3	1	-5	4	-3	-5	-5	-3
2	0.95685	-1	-1	-3	-3	-4	-2	0	-1	-3	-4	-4	5	-3	-4	4	-1	1	-4	-4	-2	0	1	0	0	1	-0.277	1.648	0.533	1.831	-0.561	0.95416	1	-2	-2	-1	-3	-3	-1	-4	-4	1	2	-1	1	0	1	-2	0
2	0.83601	-2	-3	-2	-2	-3	-2	-2	-3	-3	-3	-3	-2	-3	2	6	0	2	-3	-2	-3	0	0	1	0	1	0.421	-1.392	-1.628	0.189	2.081	0.83974	-2	-3	-2	-3	-3	-3	-3	-3	-3	1	3	-3	-1	-2	1	3	-1
2	0.98407	0	1	-2	-1	-5	0	4	-2	-4	-3	-3	2	-4	-5	2	0	0	-5	-5	-2	0	0	1	0	1	0.113	-0.837	1.477	1.357	-1.453	0.9839	0	-1	-1	0	-4	-1	1	-2	-4	-1	-2	1	-1	-4	0	1	4
2	0.033612	-2	5	-1	-4	-4	-2	-4	-4	-1	-3	-4	-2	-1	-5	-5	1	5	-6	-3	-2	0	1	0	0	1	1.242	-1.262	-0.544	-1.337	-0.279	0.030364	-5	-5	-5	-6	-6	-5	-5	-6	-1	-3	-4	-5	-4	3	-6	-5	-5
2	0.24063	0	-2	-1	1	-4	0	1	-3	-2	-2	-3	0	-2	-5	6	0	-1	-6	-5	-3	0	0	1	0	1	-0.259	-3.242	-3.656	1.05	0.302	0.24783	-2	-2	-2	-2	-4	-4	-4	-5	-4	2	5	-4	-1	3	-4	-3	-3
2	0.27819	-3	-5	-6	-5	-5	-5	-6	-5	-2	2	3	-5	0	6	-4	-5	-2	5	1	1	0	1	0	1	0	1.266	-0.912	-1.505	-1.019	-0.987	0.27006	-2	-1	3	2	-2	1	1	-1	2	-2	-3	0	-3	-1	-4	2	1
2	0.29349	3	-1	-2	-3	4	-1	-2	-1	-2	0	0	-4	-1	0	0	-1	-3	-5	-4	2	1	0	0	1	0	1.57	-0.146	-0.733	-0.591	-1.302	0.27032	-2	2	0	0	-5	0	-1	0	1	-1	-2	4	1	0	-1	0	-1
2	0.21037	-1	-1	1	6	-4	-1	0	1	3	-5	-5	-3	-4	-5	0	1	-1	-5	-4	-4	0	0	1	1	0	-0.259	-3.242	-3.656	1.05	0.302	0.21139	-4	-2	0	-1	0	1	-1	-3	3	-2	-1	-3	3	3	-4	-2	-2
2	0.58009	2	-1	0	0	-5	3	2	-1	2	-1	-1	2	0	-5	-2	-1	-1	-5	-4	-2	1	0	0	0	1	1.045	2.064	1.33	-0.384	1.652	0.51043	-3	-2	-1	-3	-3	-3	-2	-3	1	1	1	-2	3	3	-2	-2	-2
2	0.44479	0	2	1	2	-3	2	1	-2	1	-2	0	3	0	-5	-4	-1	-2	-2	-1	-3	1	0	0	0	1	-0.277	1.648	0.533	1.831	-0.561	0.46752	4	0	-1	-3	-4	-2	2	-2	-1	-4	-2	-1	-3	-4	-4	3	-1
2	0.040859	-1	-4	-3	-4	-3	-4	-4	-4	-5	1	-3	-4	-3	-4	-4	1	7	-5	-4	2	0	0	1	1	0	0.908	1.313	2.213	-0.032	0.326	0.036681	-2	-5	-5	-4	-5	-4	-4	-5	-5	-5	-6	-4	-5	-6	9	-3	-4
2	0.15242	-4	-5	-6	-6	-5	-5	-6	-5	-3	-1	3	-5	0	6	-6	-5	-2	1	5	0	1	0	0	1	0	-0.838	1.512	3.097	0.26	0.83	0.13545	-3	-3	-2	-1	-6	6	-2	-5	7	0	-4	-3	0	0	2	-3	-2
2	0.21274	-4	-5	-5	-5	-4	-5	-3	-6	-4	5	1	-5	0	3	-5	-1	1	-4	2	3	0	1	0	1	0	0.908	1.313	2.213	-0.032	0.326	0.18572	-3	-3	7	-2	-5	-3	-3	-4	-3	-1	-5	-3	-4	-5	-4	1	4
2	0.49818	-2	-1	-1	1	-1	-1	4	-1	1	0	-1	2	-2	-1	-2	-2	-1	-2	-2	1	0	0	1	0	1	0.113	-0.837	1.477	1.357	-1.453	0.56427	-1	1	-1	-2	-2	-2	-2	-1	2	4	-1	0	1	3	-2	-2	0
2	0.5722	0	-2	0	-1	3	-1	-2	-2	-2	2	1	-2	3	-2	1	0	1	-1	-1	0	0	1	0	1	0	-1.02	-0.255	-0.862	-1.343	0.465	0.52607	-1	-1	1	2	-1	-1	0	-1	0	-1	-2	0	-1	-2	-1	1	3
2	0.40719	-1	-2	-2	-1	-3	1	0	-1	0	3	0	-1	-1	-3	3	0	-1	-3	-3	1	1	0	0	0	1	1.57	-0.146	-0.733	-0.591	-1.302	0.40247	1	0	0	3	-4	2	2	-3	-1	-4	-3	2	-2	-4	-3	0	1
2	0.182	-2	-4	-4	-4	9	-4	-4	2	-3	1	0	-4	-2	-2	-4	-3	-3	-3	3	-2	0	0	1	1	0	-1.02	-0.255	-0.862	-1.343	0.465	0.12941	1	0	2	-2	-3	-2	-3	5	3	-4	-4	-2	-3	-4	-3	-2	-2
2	0.77917	0	0	0	2	-4	2	0	-2	1	-3	-2	4	-3	-3	-1	1	-1	-6	-3	-1	0	0	1	0	1	-0.277	1.648	0.533	1.831	-0.561	0.78299	-1	-1	1	0	1	1	3	-1	0	-1	-1	1	1	-2	0	-1	0
2	0.16557	3	-4	-4	-4	-3	-3	-4	2	-4	2	0	-3	-2	0	1	-2	1	-4	-3	1	1	0	0	0	1	1.57	-0.146	-0.733	-0.591	-1.302	0.21726	0	-4	-4	-4	4	-4	-1	-1	-4	4	1	-4	-1	1	-4	-1	-2
2	0.26758	4	-4	-4	-4	-3	-3	-3	-2	-4	1	-2	-3	-2	1	-1	2	0	-4	-3	3	1	0	0	0	1	1.57	-0.146	-0.733	-0.591	-1.302	0.30155	2	-4	-4	-4	2	-4	-4	4	-4	1	1	-4	-2	-1	-4	-2	-3
2	0.30795	1	0	-4	-5	-3	-4	-4	-4	-4	1	4	-4	-1	2	-4	-1	-3	-4	-2	3	1	0	0	0	1	1.266	-0.912	-1.505	-1.019	-0.987	0.33105	0	0	-5	-5	-3	-4	-4	-5	-5	3	4	-4	-1	0	-5	-4	-3
2	0.38728	0	-4	-5	-5	2	-4	-5	-3	-5	2	4	-4	1	3	-5	-4	-2	-4	-2	3	1	0	0	1	0	1.266	-0.912	-1.505	-1.019	-0.987	0.43561	1	-3	-3	-3	4	-3	-3	1	-4	0	1	-3	-2	-3	-3	2	3
2	0.45925	0	-4	-4	-5	9	-4	-4	-4	-4	1	-1	-4	-1	3	-4	-2	-1	-4	-3	1	1	0	0	1	0	-1.02	-0.255	-0.862	-1.343	0.465	0.49978	-1	-4	-4	-5	8	-4	-5	-2	-4	1	2	-4	-2	-3	-4	-1	-3
2	0.18907	-4	4	-3	-1	-4	-1	-2	-3	-1	0	2	1	-1	2	-5	-2	-3	-4	0	0	0	0	1	1	0	0.44	2.897	1.502	1.538	-0.055	0.20245	0	-3	-3	-5	-2	1	-4	-4	1	3	1	-4	4	2	-5	-3	-1
2	0.6001	2	-3	-3	0	-4	-3	-4	1	-3	1	2	-1	-3	-2	-1	1	-1	-5	-1	1	0	0	1	1	0	1.57	-0.146	-0.733	-0.591	-1.302	0.48698	1	0	2	2	-4	2	-1	0	1	-5	-4	-2	-3	-5	-1	3	2
2	0.42254	-1	-1	-2	-3	-2	-2	-2	-2	-3	-3	-3	1	-2	-4	6	0	2	-4	-3	-3	0	0	1	0	1	0.421	-1.392	-1.628	0.189	2.081	0.32396	0	0	-1	-2	-3	0	-1	-1	0	-2	-1	0	-3	0	5	1	1
2	0.52491	-2	0	3	-2	1	1	1	0	2	-3	-1	1	-3	0	2	0	-1	1	-1	-3	0	0	1	0	1	-0.169	0.933	1.299	0.945	0.828	0.45843	1	1	-1	-2	0	2	0	0	0	-4	-3	2	-4	-5	4	0	-1
2	0.089997	-2	-1	2	2	-4	4	5	-3	2	-4	-3	-1	-3	-4	-3	-1	-3	-4	-3	-4	1	0	0	0	1	0.113	-0.837	1.477	1.357	-1.453	0.099495	-1	2	3	-2	-2	0	-2	0	4	-1	1	2	0	-1	-2	-1	-1
2	0.15317	-3	-5	-6	-6	-4	-5	-5	-6	-5	4	4	-5	2	2	-5	-5	-3	-4	-3	2	0	0	1	1	0	1.266	-0.912	-1.505	-1.019	-0.987	0.15219	0	-4	-2	-2	1	-2	-1	0	2	0	2	-4	1	2	-5	-1	0
2	0.061871	1	1	1	1	-2	3	1	1	1	-3	-3	1	-4	-4	0	1	0	-5	-4	-4	1	0	0	0	1	1.57	-0.146	-0.733	-0.591	-1.302	0.066862	0	-5	-3	-5	-1	-5	-5	-5	-5	1	3	-3	2	1	-5	-2	0
2	0.3641	-3	1	-3	-2	-3	-1	5	-4	-2	1	-3	3	-3	-2	-4	-2	-1	-5	-4	1	0	0	1	0	1	0.113	-0.837	1.477	1.357	-1.453	0.40308	-2	-5	-3	-4	-5	-4	-4	7	-4	-6	-6	-3	-5	-6	-5	-3	-4
2	0.060695	1	-3	-2	-2	-5	2	2	2	4	-2	-1	-3	-1	0	-2	-1	-1	-2	3	-3	1	0	0	0	1	-0.503	-1.853	-3.005	0.931	-0.179	0.07022	1	-1	-4	-3	-3	-2	-4	-3	0	-1	3	-1	1	1	-5	-2	-4
2	0.10915	-4	2	-5	-6	-4	-4	-4	-6	-4	0	4	-3	4	4	-4	-4	-4	-1	-2	-1	0	0	1	0	1	-1.005	1.212	2.219	-0.663	-1.524	0.088367	-1	-3	0	4	-5	0	5	-1	-1	-5	-5	-1	-3	-5	-4	2	1
2	0.22679	1	-5	-3	-4	-5	-4	-4	7	-4	-6	-6	-4	-5	-5	-4	-2	-2	-5	-5	-5	0	0	1	0	1	1.045	2.064	1.33	-0.384	1.652	0.17596	0	-3	-2	-3	-3	-3	-3	-3	-3	-4	-5	-3	-4	-5	-3	6	4
2	0.076487	0	1	0	3	-3	1	3	-2	-1	-2	-3	0	-2	-3	2	-1	-1	-2	-3	-2	0	0	1	0	1	0.113	-0.837	1.477	1.357	-1.453	0.096873	1	-1	0	1	-3	0	1	-2	-2	-3	-3	1	-3	-3	5	1	1
2	0.00784	4	-4	-3	-3	-2	-3	-3	3	-4	-5	-5	-3	-4	-5	-2	4	-1	-5	-4	-4	1	0	0	1	0	0.67	-2.647	-4.76	-0.228	1.399	0.008392	3	-4	-3	-4	-4	-4	-4	6	-4	-5	-5	-4	-5	-5	-4	-2	-3
2	0.25589	-3	-2	-5	-5	-4	-4	-3	-5	-4	1	3	-2	0	7	-5	-4	-2	-3	0	-2	1	0	0	1	0	1.266	-0.912	-1.505	-1.019	-0.987	0.23623	-1	2	0	0	-5	2	-1	-2	0	-3	-2	5	-2	-2	-4	-1	-2
2	0	0	0	0	0	0	0	0	0	0	0	0	0	0	0	0	0	0	0	0	0	0	0	0	0	0	0	0	0	0	0	0	0	0	0	0	0	0	0	0	0	0	0	0	0	0	0	0	0
2	0	0	0	0	0	0	0	0	0	0	0	0	0	0	0	0	0	0	0	0	0	0	0	0	0	0	0	0	0	0	0	0.74257	-2	-2	-3	-4	-2	-1	-3	-4	-2	0	1	-2	8	-1	-3	-2	-1
2	0.11577	1	1	1	-2	-5	-1	-1	-1	-1	-5	-5	5	-4	-5	-2	1	1	-5	-4	-4	1	0	0	0	1	-0.277	1.648	0.533	1.831	-0.561	0.13826	0	-2	-3	0	-5	1	6	-2	-2	-4	-4	-2	1	-3	-4	-1	-3
2	0.00963	6	-3	-4	-4	-2	-3	-4	-2	-4	-3	-3	-3	0	-5	-4	-1	-3	-5	-4	0	0	1	0	1	0	1.57	-0.146	-0.733	-0.591	-1.302	0.006124	-3	-5	-6	-6	-4	-5	-5	-6	-6	4	0	-5	-1	-3	-4	-4	-3
2	0.004055	-3	-5	-6	-6	-4	-5	-6	-6	-5	0	6	-5	1	3	-6	-5	-4	0	0	-1	0	1	0	1	0	-0.397	0.412	1.891	-1.006	-0.59	0.004627	-2	-5	-3	-4	-5	-4	-5	7	-5	-6	-6	-4	-5	-6	-5	-3	-4
2	0.20588	-2	-1	0	0	-3	1	1	3	-2	-2	-2	2	0	-2	2	1	-1	-5	-2	-3	1	0	0	0	1	1.045	2.064	1.33	-0.384	1.652	0.23579	-1	0	0	-3	3	0	0	-2	1	0	2	0	-1	2	-2	-1	-2
2	0.19642	-3	6	-3	-3	-2	1	-2	-3	-4	-3	-2	3	-2	1	-4	0	-2	-1	-2	-3	1	0	0	1	0	0.44	2.897	1.502	1.538	-0.055	0.17597	0	0	-1	-3	0	-1	0	0	-1	2	1	-2	1	-3	-4	0	2
2	0.26482	0	0	0	0	-5	2	2	-1	-2	-3	-3	2	1	-1	2	0	0	-1	-3	-2	1	0	0	1	0	1.57	-0.146	-0.733	-0.591	-1.302	0.23491	-2	-2	0	2	-1	1	3	-4	0	-2	-2	0	-2	-1	-2	0	0
2	0.32227	-3	1	5	3	-3	-2	-1	-3	2	-3	-3	1	0	-3	-3	2	-1	-1	-3	-3	0	0	1	0	1	-0.169	0.933	1.299	0.945	0.828	0.25024	-1	-3	-3	-2	1	0	-1	-3	0	-1	-3	-2	-1	2	0	1	-2
2	0.015558	-5	-5	-5	-6	1	-5	-5	-6	-1	-4	-3	-5	-3	5	-6	-5	-4	5	9	-4	1	0	0	1	0	-0.397	0.412	1.891	-1.006	-0.59	0.007897	-4	-1	-6	-6	-4	-5	-6	-6	-5	4	5	-5	0	1	-6	-5	-4
2	0.40572	-2	-4	-4	-4	2	-4	-4	-4	-4	-1	-3	-3	-3	-4	6	0	-2	-5	-4	4	0	0	1	1	0	-1.02	-0.255	-0.862	-1.343	0.465	0.38188	-3	-2	-2	2	-4	0	7	-4	-2	-5	-5	-1	-4	-5	-3	1	-3
2	0.041218	-4	-4	-5	-5	-4	-4	-5	-5	-1	-2	1	-4	-2	6	-5	-4	-4	0	8	-3	0	1	0	1	0	-0.397	0.412	1.891	-1.006	-0.59	0.039523	6	-3	-3	-4	-2	-3	-3	0	-4	-3	-4	-3	-3	-4	-3	0	-2
2	0.3715	-2	3	-2	-3	-5	0	-1	-2	-3	-1	-2	5	0	-4	2	-2	-1	-5	-3	-1	0	0	1	0	1	-0.277	1.648	0.533	1.831	-0.561	0.36015	-4	-2	8	-1	-5	-2	-1	-2	-1	-5	-6	-2	-4	-5	-4	-1	-2
2	0.49922	-3	-2	-2	0	-6	2	7	-3	-2	-5	-5	0	-4	-5	-2	-2	-2	-5	-4	-4	1	0	0	1	0	0.113	-0.837	1.477	1.357	-1.453	0.52602	0	-2	-2	-1	-5	0	7	0	-2	-5	-5	-1	-4	-5	-3	-2	-2
2	0.51487	-1	-1	0	-2	-2	-1	-3	-5	-1	1	3	1	4	-1	-4	-2	-2	-1	3	-1	0	0	1	0	1	0.393	0.816	2.131	-1.239	-0.547	0.4426	-2	-4	-2	-3	-5	-3	-1	7	-4	-6	-6	-3	-5	-5	-4	-2	-4
2	0.028162	-3	8	-2	-4	-6	-1	-2	-4	2	-5	-4	0	-3	-5	-4	-3	-3	-5	-3	-5	0	1	0	1	0	-1.474	-0.078	-1.673	0.336	-0.417	0.025105	-3	-5	-5	-5	-3	-5	-5	-6	-5	8	0	-5	-1	-2	-5	-4	-3
2	0.73972	4	-2	-2	-3	-2	0	-2	-2	-3	-2	-1	-2	-2	-1	-2	1	3	-3	-3	-1	0	1	0	1	0	1.57	-0.146	-0.733	-0.591	-1.302	0.73069	3	-2	-2	1	-2	-1	1	-2	4	0	-1	-2	1	-2	-2	1	-1
2	0.22145	-3	-5	-4	-5	-4	-4	-5	-5	-5	6	-1	-4	1	-2	-4	-1	4	-5	-4	2	1	0	0	1	0	0.908	1.313	2.213	-0.032	0.326	0.18459	-3	-5	-6	-6	-4	-5	-6	-4	-6	3	4	-5	2	3	-6	-5	-2
2	0.75038	-1	-3	-3	-1	1	1	1	-2	0	3	-1	-2	1	-3	3	0	0	-4	-1	1	0	0	1	0	1	1.57	-0.146	-0.733	-0.591	-1.302	0.71791	-2	-4	-3	1	-5	0	-1	0	-4	-2	-2	-3	-4	-2	7	-3	-3
2	0.22051	-3	-5	-3	-5	3	-3	-4	-4	-3	2	-1	-4	-3	-1	-5	-1	3	-4	3	4	0	1	0	1	0	1.242	-1.262	-0.544	-1.337	-0.279	0.1548	-3	-5	-5	-4	-2	-5	-5	-3	-5	4	2	-5	-1	-3	-5	-4	-3
2	0.66696	-1	0	0	0	-5	1	0	-1	2	0	-1	0	2	1	0	-1	0	4	1	-1	0	0	1	0	1	1.045	2.064	1.33	-0.384	1.652	0.66381	-1	0	1	1	-5	-1	-1	0	1	-1	-1	1	0	0	2	1	0
2	0.091814	0	-1	-3	-4	-5	-2	-3	-5	-2	-1	0	0	7	-2	3	-3	0	3	0	1	0	0	1	1	0	0.421	-1.392	-1.628	0.189	2.081	0.073677	-3	-6	-6	-6	3	-5	-4	-6	-6	5	2	-5	1	-1	-6	-5	-2
2	0.30982	0	-1	-2	-2	-3	-2	-2	-3	0	-1	1	-2	0	5	1	0	-1	2	2	0	0	0	1	1	0	-0.838	1.512	3.097	0.26	0.83	0.28691	0	0	-1	3	-4	0	1	-1	0	-3	-2	-1	-2	-3	3	1	1
2	0.033625	-1	-3	-3	-1	-2	-1	6	0	-3	-2	-2	-3	-3	-4	-1	-1	0	-5	-4	1	1	0	0	1	0	0.113	-0.837	1.477	1.357	-1.453	0.034839	-2	-5	-5	-5	-2	-4	-4	-5	-5	3	4	-5	4	-1	0	-4	-2
2	0.15259	-4	0	2	-1	-5	1	0	-4	9	-5	-5	-3	-4	-3	-4	-3	-4	-2	3	-5	0	0	1	1	0	-1.474	-0.078	-1.673	0.336	-0.417	0.13262	1	-3	-3	-4	0	-3	-3	-4	-4	-1	-2	-3	-1	-4	7	-1	-2
2	0.026607	-3	-2	1	-2	-4	0	-3	7	-2	-7	-7	-2	-6	-6	-4	-3	-4	-6	-6	-6	0	0	1	0	1	-0.503	-1.853	-3.005	0.931	-0.179	0.024264	-3	-5	-5	-5	-1	-5	-6	-7	-6	5	4	-6	1	-2	-6	-5	-3
2	0.3339	-3	-5	-5	-5	-3	-5	-5	-6	-5	6	0	-5	-1	-2	-5	-4	-2	-5	-3	5	0	0	1	0	1	1.242	-1.262	-0.544	-1.337	-0.279	0.30725	-3	-3	-1	7	-5	-2	2	-2	-3	-5	-6	-2	-5	-6	-3	0	-3
2	0.090798	-1	5	-1	-3	-5	4	2	-4	-3	-2	-1	0	0	-5	-4	-2	0	-5	-4	-3	1	0	0	1	0	0.44	2.897	1.502	1.538	-0.055	0.10483	3	-4	-1	-4	-1	-3	-3	-1	-4	-4	-4	-3	-3	-5	-4	3	5
2	0.020919	-3	-5	-6	-6	-4	-4	-5	-6	-5	-1	6	-5	5	0	-5	-4	-2	-4	-3	-1	1	0	0	1	0	1.266	-0.912	-1.505	-1.019	-0.987	0.026796	3	-5	-5	-6	-4	-4	-5	-5	-5	2	4	-4	3	-3	-5	-3	-3
2	0.21613	1	-5	-5	-5	-3	-4	-4	-4	-5	1	0	-4	-3	-4	6	-1	-3	-5	-2	3	0	1	0	1	0	0.421	-1.392	-1.628	0.189	2.081	0.21151	-3	-4	4	-4	-3	-4	-4	-1	2	-2	0	-4	0	7	-6	-3	-3
2	0.38219	-1	-1	2	1	-5	-1	0	-1	4	-3	-2	2	0	-4	1	1	-2	-6	-3	2	0	1	0	0	1	1.242	-1.262	-0.544	-1.337	-0.279	0.36562	-2	-5	-6	-6	-2	-5	-5	-6	-1	2	1	-5	-1	2	-3	-4	-3
2	0.11256	-2	3	-1	0	-5	1	-1	-4	-1	-1	-2	5	-4	-4	0	-1	-1	-5	-3	-1	0	1	0	0	1	-0.277	1.648	0.533	1.831	-0.561	0.070101	2	-4	-3	-4	-3	-3	-3	-2	-4	-4	-4	-3	-4	-5	-4	3	6
2	0.15507	-1	4	-1	-3	-4	-1	-1	0	-3	-3	-2	3	4	1	-4	0	0	-1	-3	-3	1	0	0	1	0	0.67	-2.647	-4.76	-0.228	1.399	0.1019	1	2	-1	-2	-4	1	-2	1	-3	-3	-2	2	2	2	1	1	-2
2	0.08913	0	-4	-4	-4	1	-4	-4	-3	-1	1	-1	-4	-1	1	-4	-3	-2	0	6	4	0	1	0	1	0	-0.397	0.412	1.891	-1.006	-0.59	0.089275	3	1	-4	-2	-3	-2	-2	-2	0	0	0	-2	-2	-2	-3	-2	-1
2	0.083492	-1	-1	-3	1	-3	1	4	-2	1	-2	-1	-1	-1	-3	-2	1	1	-5	-2	-1	0	1	0	1	0	0.113	-0.837	1.477	1.357	-1.453	0.08143	4	-3	-2	-3	0	0	-1	2	-3	0	-1	-1	1	-3	0	-1	0
2	0.20579	2	-1	0	0	-4	-2	-2	4	-2	-3	-5	-3	-4	-2	-1	2	-2	-5	-2	-2	1	0	0	1	0	1.57	-0.146	-0.733	-0.591	-1.302	0.17269	0	0	-1	2	-5	0	4	-4	-1	-3	-3	2	-1	-5	-3	-1	1
2	0.033421	-3	-3	-3	-3	-3	2	-3	1	4	1	1	-3	3	2	-4	1	-3	-3	3	-2	1	0	0	1	0	-1.005	1.212	2.219	-0.663	-1.524	0.047285	2	-4	-5	-5	0	-2	-4	-4	-4	1	2	-4	6	0	-4	-1	-2
2	0.10285	-2	2	0	3	-1	2	3	-1	2	-4	-4	0	-4	-4	-4	0	-1	-5	-2	-3	1	0	0	1	0	0.113	-0.837	1.477	1.357	-1.453	0.12221	3	-4	-4	-4	3	-4	-4	-3	-5	2	1	-3	1	-1	-4	0	1
2	0.21015	-1	2	-5	-5	-5	-1	-3	-6	-5	4	0	2	-2	-4	-5	-2	-1	-5	-1	4	1	0	0	1	0	0.44	2.897	1.502	1.538	-0.055	0.19508	-3	-3	-3	-2	-5	-4	-3	7	0	-7	-6	-3	-6	-6	-5	-3	-4
2	0.13554	-3	-4	2	-3	-3	-3	-4	-4	-4	6	-1	-3	0	-2	-4	2	1	-5	-3	0	0	1	0	1	0	0.393	0.816	2.131	-1.239	-0.547	0.18	-4	-5	-5	-5	-4	-5	-4	-5	-3	-1	-1	-5	-2	8	2	-4	-4
2	0.1561	-3	-3	-3	-4	-3	-2	-4	-4	-1	-1	2	-4	1	7	-3	-1	-2	-1	2	-2	0	1	0	1	0	-0.397	0.412	1.891	-1.006	-0.59	0.15343	-3	-4	-3	2	-3	-2	-3	-4	-4	6	0	-4	0	-2	-4	-3	-1
2	0.40229	-3	-4	-5	-5	-3	-4	-5	-6	-5	2	6	-4	0	0	-5	-4	-3	-3	-3	1	1	0	0	1	0	1.266	-0.912	-1.505	-1.019	-0.987	0.37686	-2	5	4	-2	-2	0	-1	-2	3	-5	-4	2	-2	-4	-4	0	-2
2	0.43124	0	-1	0	0	-4	0	-2	-3	-3	-1	0	2	0	-2	5	-1	-1	-4	-3	-2	0	0	1	0	1	0.421	-1.392	-1.628	0.189	2.081	0.42389	-1	1	0	0	-4	0	2	-2	-1	1	-2	4	0	-4	-1	0	0
2	0.32814	1	5	-3	-2	-4	0	-2	-4	0	0	1	0	0	-4	-4	-1	-1	-4	-4	-2	1	0	0	0	1	1.266	-0.912	-1.505	-1.019	-0.987	0.23567	-1	1	0	1	-4	2	2	-2	-1	1	0	-2	0	-3	-4	-1	0
2	0.1179	2	0	5	0	-5	-3	-2	-1	4	-6	-6	2	-3	-6	-3	1	-3	-6	-3	-5	0	0	1	0	1	1.045	2.064	1.33	-0.384	1.652	0.10987	1	1	-2	-1	0	-1	-1	-4	-4	-5	-5	5	-5	-5	5	-2	-2
2	0.072922	-2	-3	-5	-4	-2	-4	2	-6	-5	2	-1	-2	2	0	-5	-3	2	-6	-4	5	0	1	0	1	0	1.242	-1.262	-0.544	-1.337	-0.279	0.052095	-2	-6	-6	-6	-4	-5	-6	-5	-6	6	1	-6	4	-3	-6	-5	-4
2	0.50055	-1	0	-2	0	-1	0	1	-1	-1	-2	-2	0	-2	-2	5	0	0	-2	-1	-1	1	0	0	0	1	0.421	-1.392	-1.628	0.189	2.081	0.43016	-1	1	0	0	-2	1	3	-2	1	-1	0	1	-1	0	-1	-1	0
2	0.086244	3	0	0	1	-2	-1	0	-2	4	-2	-1	-1	0	-2	0	-1	-2	-2	1	-2	0	0	1	0	1	1.57	-0.146	-0.733	-0.591	-1.302	0.059087	-2	0	2	1	1	-2	-3	5	-1	-3	-4	-2	-4	-3	-2	-1	-2
2	0.031947	0	-3	-5	-5	0	-3	-5	-4	-5	3	1	-5	0	1	-3	-4	-1	-5	-4	5	0	1	0	1	0	1.242	-1.262	-0.544	-1.337	-0.279	0.022685	-3	6	1	-2	-1	0	2	-2	-1	-3	-3	-2	-2	-5	-3	-1	-1
2	0.085732	1	4	-1	3	-4	1	3	-2	-1	-5	-4	1	-2	-3	-3	0	-2	-1	-1	-5	1	0	0	0	1	0.113	-0.837	1.477	1.357	-1.453	0.083126	-2	-3	-5	-4	0	-2	-5	-5	-4	3	2	-5	3	1	-5	-4	-3
2	0.1	1	4	-1	-1	-5	1	2	-2	3	-1	-2	0	-2	-4	-5	-1	-2	-3	-3	0	1	0	0	0	1	0.113	-0.837	1.477	1.357	-1.453	0.084693	0	-5	-3	-5	-3	-4	-5	-5	0	3	1	-5	-2	3	-4	-3	-2
2	0.56086	-1	0	1	1	-5	1	1	-3	-2	-4	-5	2	-4	-4	5	-1	1	-6	-5	-4	0	0	1	0	1	-0.277	1.648	0.533	1.831	-0.561	0.61378	-2	-4	3	-4	-4	-3	-4	-4	-4	1	2	-3	-1	-2	1	0	3
2	0.32264	-3	-5	-5	-5	-2	-4	-5	-5	-5	7	1	-4	0	-2	-4	-4	-2	-4	-3	2	0	1	0	1	0	1.242	-1.262	-0.544	-1.337	-0.279	0.31896	-1	-4	-2	-3	-4	-3	-4	7	-4	-5	-5	-3	-4	-5	-4	-2	-3
2	0.2513	-1	1	0	4	-6	4	3	-3	-2	-5	-5	3	-1	-6	-4	-2	-3	-6	-5	-4	1	0	0	0	1	-0.277	1.648	0.533	1.831	-0.561	0.24783	0	0	-2	0	-5	3	-1	-4	1	-4	-4	6	0	-5	-4	-2	-2
2	0.058134	0	-4	-1	-3	1	-4	-2	6	-4	-6	-5	-3	-5	-3	-4	1	-2	-5	-5	-5	0	0	1	0	1	1.045	2.064	1.33	-0.384	1.652	0.05624	-2	-1	1	5	-6	-2	3	2	-3	-6	-6	1	-5	-5	-3	0	-2
2	0.13527	1	-4	-5	-5	-4	-3	-2	-5	-2	0	3	-3	0	2	-5	0	0	-3	5	0	1	0	0	1	0	-0.838	1.512	3.097	0.26	0.83	0.14739	1	4	-1	-5	4	-2	-4	-4	1	3	1	-2	2	-4	-4	0	-2
2	0.18289	-1	-4	-1	-1	9	2	0	-4	-4	-3	-2	-3	-2	-3	-4	-1	-2	-4	-4	-3	1	0	0	0	1	1.266	-0.912	-1.505	-1.019	-0.987	0.2045	-2	-2	-1	3	-3	0	2	-1	-2	4	-2	-1	-2	-2	-3	-1	-1
2	0.46401	-2	3	-2	-3	-4	0	-2	-3	-2	2	-1	1	-2	-3	-4	-2	-1	-5	-1	4	0	0	1	0	1	1.242	-1.262	-0.544	-1.337	-0.279	0.51267	-1	0	-1	0	-4	-1	2	2	0	-1	-3	0	-1	-2	-1	2	2
2	0.1018	5	-3	-3	-4	2	-3	-3	-1	-3	-1	-3	-2	-2	1	-2	0	0	-4	-1	0	1	0	0	1	0	1.57	-0.146	-0.733	-0.591	-1.302	0.1109	-1	1	-1	-1	-3	0	0	-1	-3	-2	-3	5	0	-2	-1	-1	1
2	0.067494	2	3	0	-3	0	-1	-3	-2	-4	-4	-2	1	-2	-5	-4	4	-1	-4	-3	-2	1	0	0	0	1	0.67	-2.647	-4.76	-0.228	1.399	0.078064	3	-5	-3	-5	-2	-3	-4	6	-5	-5	-5	-4	-5	-3	-5	0	-4
2	0.53918	0	0	-2	-1	-3	0	1	-2	-3	-2	-1	0	-2	-3	6	-1	-1	-5	-4	-2	0	0	1	0	1	0.421	-1.392	-1.628	0.189	2.081	0.44459	0	-1	-3	-4	1	-2	-2	-3	-2	0	0	-1	-3	-4	6	-2	-2
2	0.007705	-3	-4	-5	-6	-2	-3	-5	-6	-5	0	6	-5	1	-2	-4	-4	-3	-1	-3	-1	1	0	0	1	0	1.266	-0.912	-1.505	-1.019	-0.987	0.008721	6	-4	-3	-4	3	-3	-3	-2	-4	-4	-4	-3	-4	-5	0	2	-1
2	0.01403	-4	-5	-5	-6	-5	-5	-5	-6	-3	-2	2	-5	2	7	-6	-3	-3	-2	5	-3	1	0	0	1	0	-0.397	0.412	1.891	-1.006	-0.59	0.016096	1	-3	-3	0	-6	0	7	1	-3	-6	-5	-2	-5	-6	-3	-2	-4
2	0.057267	-3	-2	2	0	-1	2	-1	-1	1	-3	-2	-2	-3	-3	5	-2	1	-3	-1	-2	0	0	1	1	0	-0.503	-1.853	-3.005	0.931	-0.179	0.069395	-4	-6	-6	-6	-3	-5	-6	-6	-6	5	1	-5	4	2	-4	-5	-3
2	0.080257	-5	-5	-5	-6	-4	-4	-5	-6	-1	-4	-4	-5	-4	2	-6	-5	-5	4	9	-4	0	0	1	1	0	-0.838	1.512	3.097	0.26	0.83	0.080161	-2	-5	-3	-4	-5	-5	-5	7	-5	-6	-5	-4	-5	-6	-5	-3	-4
2	0.22473	-2	3	2	0	-2	-1	1	-4	-1	-3	-2	2	-2	-4	-4	2	3	-6	-4	-1	0	0	1	0	1	0.908	1.313	2.213	-0.032	0.326	0.22595	0	-3	-4	-4	0	-4	-3	-4	-2	2	0	-2	1	2	3	0	2
2	0.69064	0	3	-1	-2	-6	1	2	-3	0	-3	-3	3	1	-6	1	0	-1	-6	-2	-2	0	0	1	0	1	0.113	-0.837	1.477	1.357	-1.453	0.64369	-1	-1	1	5	-2	-1	2	-4	-4	0	0	-1	-1	-2	-2	1	-2
2	0.15285	-1	0	0	0	2	0	0	-1	2	0	-1	0	2	1	0	-1	0	4	1	-1	1	0	0	0	1	-0.277	1.648	0.533	1.831	-0.561	0.15646	-1	-5	-1	0	-5	-1	-1	-5	1	4	2	-1	1	0	-2	-1	-1
2	0.2229	0	-4	-4	-4	4	-4	-4	-4	-4	1	0	-4	3	2	1	-3	1	5	3	1	0	1	0	1	0	0.393	0.816	2.131	-1.239	-0.547	0.22603	-3	-2	2	2	-4	2	1	-3	4	-3	0	1	-3	-4	2	1	-2
2	0.68153	0	0	-1	-2	0	-1	-1	-2	-2	-1	-1	-1	1	-2	0	1	3	-5	-3	2	0	0	1	0	1	0.908	1.313	2.213	-0.032	0.326	0.71384	-2	0	1	6	-1	0	0	-3	-1	-3	-3	-1	-1	-2	0	0	-1
2	0.17846	1	1	-1	-2	-3	-1	0	-3	-1	0	-1	0	0	0	-2	-1	0	-3	0	3	1	0	0	1	0	-0.277	1.648	0.533	1.831	-0.561	0.13232	0	-4	-3	0	0	-2	-2	-4	2	1	1	-3	1	-1	-4	0	3
2	0.26652	-2	-4	-4	-3	-1	-3	-1	-5	-2	2	2	-2	4	0	-2	-1	1	0	-1	3	0	0	1	1	0	1.242	-1.262	-0.544	-1.337	-0.279	0.25299	-1	0	0	4	-3	0	4	-2	-2	-3	-3	0	-2	-4	-1	0	-2
2	0.20049	-1	-1	-1	0	0	-1	1	-2	-1	1	2	-1	3	1	-2	-2	-1	1	0	1	1	0	0	1	0	0.113	-0.837	1.477	1.357	-1.453	0.17514	-2	-1	0	5	-3	0	3	1	-1	-4	-2	0	-2	-2	-2	-1	-2
2	0.21471	1	-2	-1	-1	-1	-1	0	-2	0	2	0	-1	-2	-3	-2	1	0	-6	-1	3	1	0	0	1	0	-0.503	-1.853	-3.005	0.931	-0.179	0.17598	-1	-2	-3	0	0	-1	1	-2	-1	3	-1	-2	-1	1	-3	-1	-1
2	0.16997	-1	-2	-4	-3	1	-3	-3	-3	1	2	3	-3	1	5	-5	-2	0	1	1	0	1	0	0	1	0	0.908	1.313	2.213	-0.032	0.326	0.18011	-2	2	1	3	-2	1	4	-1	2	-4	-3	2	-3	-4	-5	0	-2
2	0.22358	1	-2	-1	-3	-2	1	0	-3	-2	2	-1	-1	-3	-4	1	0	2	-5	-2	3	0	0	1	1	0	0.908	1.313	2.213	-0.032	0.326	0.15829	0	0	0	-1	-2	-2	-1	1	0	1	-2	-1	-1	-1	2	-1	0
2	0.16619	-3	-4	-5	-5	-3	-3	-4	-5	-1	3	3	-4	4	2	-2	-2	0	1	-1	3	1	0	0	1	0	1.266	-0.912	-1.505	-1.019	-0.987	0.15192	-1	-1	0	4	-3	0	3	-2	-1	-4	-3	0	-2	-4	0	1	-1
2	0.17916	-1	3	-3	-1	-2	-1	-1	-3	0	2	-2	-1	-1	0	-4	-1	-1	-2	0	4	1	0	0	1	0	0.44	2.897	1.502	1.538	-0.055	0.13614	0	-4	-2	-3	3	-4	-3	-2	-3	-1	-2	-3	-1	-3	-1	1	6
2	0.69464	-2	-1	-1	-2	-3	-1	-1	-3	9	-4	-3	-2	-2	-2	-3	1	-2	-3	0	-3	1	0	0	1	0	-1.474	-0.078	-1.673	0.336	-0.417	0.69858	-2	-2	-3	-3	-2	4	-2	-3	-2	4	1	-2	-1	-2	-3	-2	0
2	0.20496	1	-2	-2	-2	-4	1	0	-4	1	-3	3	0	0	-3	0	-1	1	-4	0	-2	1	0	0	0	1	1.266	-0.912	-1.505	-1.019	-0.987	0.21555	-2	-2	3	3	-4	2	1	-1	0	-3	-1	2	0	-4	-3	1	1
2	0.3576	0	0	0	0	-3	-1	-1	-2	4	-3	-3	1	-2	-3	-2	2	4	-3	-2	-2	0	0	1	0	1	0.908	1.313	2.213	-0.032	0.326	0.42298	-1	-2	4	1	-3	-2	-2	2	-2	-3	-3	-2	-3	1	-3	3	0
2	0.11552	-1	1	-1	-1	-1	0	0	2	-1	-2	1	1	-1	0	-4	0	2	-4	-1	-2	0	1	0	0	1	1.045	2.064	1.33	-0.384	1.652	0.11252	1	-2	0	-4	-3	-3	-3	0	0	0	-1	-3	0	-4	-4	1	5
2	0.18221	0	-1	-1	1	-5	4	1	2	1	-3	-4	0	-4	2	-5	0	-1	-5	-1	-2	0	1	0	1	0	0.67	-2.647	-4.76	-0.228	1.399	0.109	-4	-5	-5	-2	0	-4	-5	-6	1	-1	0	-5	-3	4	-5	-4	-2
2	0.065869	3	-4	-4	-4	-3	-4	-2	1	-4	1	0	-4	0	0	-4	0	-1	-4	-3	4	0	1	0	1	0	1.242	-1.262	-0.544	-1.337	-0.279	0.079387	-1	0	2	1	1	1	3	-1	1	-4	-2	2	1	-4	-4	-1	-1
2	0	0	0	0	0	0	0	0	0	0	0	0	0	0	0	0	0	0	0	0	0	0	0	0	0	0	0	0	0	0	0	0	0	0	0	0	0	0	0	0	0	0	0	0	0	0	0	0	0
2	0.10685	-3	1	-1	-3	-5	-1	-1	-4	-3	-5	-5	7	-3	-5	-3	-2	-3	-5	-4	-4	0	0	1	0	1	-0.277	1.648	0.533	1.831	-0.561	0.095206	-3	-4	-4	-4	-5	-3	-3	-4	-4	-5	-5	-3	-5	-6	9	-3	-3
2	0.14259	-3	8	-2	-4	-6	0	-2	-4	-1	-5	-4	0	-3	-5	-4	-3	-3	-5	-4	-3	1	0	0	1	0	0.44	2.897	1.502	1.538	-0.055	0.13067	3	-4	-3	-4	-2	-3	-3	-3	-4	2	-2	-3	-2	-4	-3	0	6
2	0.72395	-3	-3	-4	-5	-3	-2	-4	-4	-3	0	1	-3	9	-1	-4	-3	-2	-3	-3	-1	0	0	1	0	1	-1.005	1.212	2.219	-0.663	-1.524	0.71776	4	-3	-2	-2	-3	-2	-1	-2	-3	-4	-4	-2	-3	-4	1	4	2
2	0.30321	-3	-2	0	2	-3	0	-1	-4	-3	-1	2	4	-2	-4	-4	0	1	-5	-4	-2	1	0	0	0	1	-0.277	1.648	0.533	1.831	-0.561	0.35033	-3	-4	-5	-6	-4	-4	-5	-5	-4	-1	3	-5	6	3	-2	-4	-3
2	0.49264	-1	0	0	0	2	0	0	-1	2	0	-1	0	2	1	0	-1	0	4	1	-1	0	1	0	0	1	1.242	-1.262	-0.544	-1.337	-0.279	0.52252	-1	0	1	0	3	1	0	-1	-4	0	-1	0	2	1	0	0	-4
2	0.26081	-1	0	4	2	-3	1	1	-4	2	-1	-4	0	-2	0	-4	1	-2	-3	-1	-1	0	0	1	0	1	0.908	1.313	2.213	-0.032	0.326	0.20215	3	-2	-1	-1	-1	-2	-4	5	3	-5	-5	-2	-4	-1	-4	0	-3
2	0.55727	-1	2	-2	-1	-4	2	4	-2	1	-4	-2	3	-1	1	-3	0	-2	-4	-3	-1	0	0	1	0	1	-0.277	1.648	0.533	1.831	-0.561	0.58505	-2	-2	0	4	-4	-2	-1	3	-3	-4	-4	-1	-4	-4	5	-1	-3
2	0.418	-1	4	-2	-2	-5	0	-1	-4	0	-4	-2	4	2	-2	0	-2	0	-4	-1	-2	1	0	0	0	1	0.44	2.897	1.502	1.538	-0.055	0.45322	-1	-2	0	1	-2	1	3	-2	-1	-3	-2	-1	0	-1	-3	0	4
2	0.10038	-3	-1	6	-2	-5	2	-3	-2	3	0	-3	-1	-2	-4	-4	-2	1	-5	-2	-2	1	0	0	1	0	-0.169	0.933	1.299	0.945	0.828	0.079172	-3	-5	-6	-6	1	-4	-5	-3	-5	2	5	-3	4	1	-5	-4	-4
2	0.025936	-1	-5	-3	-4	0	-4	-5	7	-2	-3	-2	-4	1	-4	-5	-2	-3	-5	-5	-1	0	1	0	1	0	1.045	2.064	1.33	-0.384	1.652	0.019951	-3	-5	-6	-6	0	-5	-5	-6	-5	5	4	-5	3	-3	-5	-5	-2
2	0.3144	-1	0	-1	0	-2	-1	0	1	-2	-3	-2	0	-2	-3	6	-1	-2	-4	-3	-3	0	0	1	0	1	0.421	-1.392	-1.628	0.189	2.081	0.36572	-1	-3	-2	-2	-2	-2	-1	-3	-2	-1	-1	-2	-1	5	4	-2	0
2	0.12592	-2	0	5	1	-6	-1	0	1	1	-6	-3	0	0	-5	1	-1	1	-6	-1	-5	0	0	1	0	1	-0.169	0.933	1.299	0.945	0.828	0.12921	-1	2	1	2	-6	3	2	-2	2	-2	-3	3	0	-1	-5	-1	-1
2	0.68983	-3	1	-1	3	-3	-1	2	-4	2	-4	-2	3	-3	-2	2	1	-1	-1	-4	-4	0	0	1	0	1	0.113	-0.837	1.477	1.357	-1.453	0.70571	-1	-2	-1	2	-4	-1	-1	-1	3	-1	-2	0	-3	-4	5	0	0
2	0.037813	-4	-4	0	8	-6	0	-1	-4	0	-6	-5	-3	-4	-1	-4	-2	-3	-4	-3	-5	1	0	0	1	0	-0.259	-3.242	-3.656	1.05	0.302	0.03917	-2	-4	-2	-4	-3	-3	-3	-4	-4	-3	-4	-3	-3	-5	-4	1	7
2	0.17263	-1	4	0	0	-4	1	-1	0	1	-3	-2	3	-1	-3	-1	1	-1	-4	-3	-3	0	0	1	0	1	-0.503	-1.853	-3.005	0.931	-0.179	0.12299	-2	3	0	-3	-1	-2	-1	0	7	-3	-2	-2	-3	3	-3	0	-3
2	0.12917	-3	5	-2	-3	-5	2	0	-5	-3	-1	1	2	0	-4	-4	-3	-2	-3	-1	0	0	0	1	1	0	1.242	-1.262	-0.544	-1.337	-0.279	0.13293	-2	-2	-3	-4	-5	-4	-5	7	-5	-6	-6	-4	-5	-6	-2	-2	-4
2	0.12992	-3	0	3	3	-2	-1	0	-4	6	-2	-3	-2	-1	-5	-4	-1	3	-5	-4	0	1	0	0	1	0	0.908	1.313	2.213	-0.032	0.326	0.12275	-1	3	-1	-2	-3	5	0	-3	-1	-2	-2	-1	-3	-4	3	-1	-2
2	0.10783	1	-4	1	-3	5	-3	-4	1	3	0	-2	-3	0	-4	-3	1	-1	-2	-3	2	0	0	1	1	0	1.266	-0.912	-1.505	-1.019	-0.987	0.094502	-3	0	-1	6	-4	-1	0	2	0	-6	-6	3	-5	-6	0	-2	-3
2	0	0	0	0	0	0	0	0	0	0	0	0	0	0	0	0	0	0	0	0	0	0	0	0	0	0	0	0	0	0	0	0	0	0	0	0	0	0	0	0	0	0	0	0	0	0	0	0	0
2	0.0866	-3	1	-1	1	-5	1	0	0	2	-1	-4	0	-3	-4	-4	1	3	3	-1	0	0	0	1	1	0	0.908	1.313	2.213	-0.032	0.326	0.082523	-2	-3	-3	-3	-3	-2	-2	-6	-2	1	4	-3	-1	0	-4	-3	1
2	0.037142	-4	-5	-6	-6	-4	-5	-6	-6	-4	0	4	-5	7	-2	-6	-5	-4	-5	-4	4	1	0	0	1	0	-1.005	1.212	2.219	-0.663	-1.524	0.029124	0	-5	-6	-6	-4	-5	-5	-1	-5	3	3	-5	2	3	-5	-1	-4
2	0.004164	2	-5	-5	-6	0	-5	-5	-3	-5	2	2	-5	-1	5	-4	-2	-1	2	-2	2	1	0	0	1	0	1.57	-0.146	-0.733	-0.591	-1.302	0.004173	3	-5	-4	-5	6	-4	-5	-4	-5	1	-1	-4	-3	2	-5	2	-1
2	0.028407	-1	5	0	-3	-4	2	0	-4	-1	-3	-4	5	-1	-4	-4	-1	-2	-5	-2	-3	1	0	0	0	1	-0.277	1.648	0.533	1.831	-0.561	0.028809	2	-2	-1	0	3	-2	3	4	-4	-5	-5	-3	-5	-5	-4	1	-3
2	0.84701	-2	-3	-3	-3	2	-2	-1	-4	-4	-5	-5	-3	-4	-5	8	-2	-3	-5	-5	-4	0	1	0	1	0	0.421	-1.392	-1.628	0.189	2.081	0.86364	1	-4	-4	-4	2	-4	-4	1	-4	-1	1	-4	-2	-3	-4	0	1
2	0.048306	-3	-4	-4	-5	-1	-4	-4	-5	-3	4	0	-4	2	-2	-4	2	-1	-4	1	4	0	1	0	1	0	1.242	-1.262	-0.544	-1.337	-0.279	0.048771	-1	-3	-2	-3	-3	-3	-3	-3	-2	-4	-4	-3	1	-1	-2	5	2
2	0.047032	-1	-5	-6	-6	-3	-5	-5	-6	-5	3	5	-5	0	-2	-5	-4	-3	-4	-3	3	1	0	0	1	0	0.393	0.816	2.131	-1.239	-0.547	0.046455	5	-4	-4	-4	-3	-2	-2	1	-4	-4	-4	-3	-4	-4	3	-1	0
2	0.050451	-2	-5	-2	-4	-5	-4	-4	7	-4	-6	-5	-4	-5	-5	-4	-2	-4	-5	-5	-6	0	0	1	1	0	1.045	2.064	1.33	-0.384	1.652	0.03353	3	-3	-2	4	1	-2	-2	-3	1	-4	-5	-1	-2	-5	-3	4	-2
2	0.049834	-3	6	-2	-3	-5	-1	-2	-4	-2	-5	-4	5	-3	-5	-3	-2	-2	-5	-4	-4	1	0	0	1	0	0.44	2.897	1.502	1.538	-0.055	0.050095	-2	-5	-5	-5	-3	-4	-5	-5	-5	5	0	-4	-1	-2	-4	-4	-2
2	0.028823	3	-1	-1	-1	-4	4	1	-3	-2	-5	-4	4	-3	-4	-3	-1	-1	-5	-4	-4	1	0	0	0	1	-0.277	1.648	0.533	1.831	-0.561	0.019699	-4	-4	-6	-6	-4	-1	-5	-6	-5	1	6	-5	1	-2	-5	-5	-3
2	0.34299	-1	-3	0	4	-5	1	5	-1	-2	-4	-4	1	-4	-4	-3	-1	-2	-5	-5	-3	1	0	0	0	1	0.67	-2.647	-4.76	-0.228	1.399	0.35762	-1	0	2	3	-1	0	1	-1	4	-2	-1	0	-3	-3	-3	1	0
2	0.10914	-2	-4	-4	-3	-4	-3	-3	-4	-4	-4	-4	-3	-4	-5	8	-2	-3	-5	-4	-4	1	0	0	1	0	0.421	-1.392	-1.628	0.189	2.081	0.10152	-2	-2	-2	0	-5	2	7	-4	-2	-5	-4	-1	-3	-5	-3	-2	-2
2	0.85804	1	-2	-2	-3	3	-2	-2	4	-3	-1	-3	1	-3	-1	-3	1	3	-4	-3	-2	1	0	0	1	0	1.045	2.064	1.33	-0.384	1.652	0.86331	1	-4	-4	-5	3	-3	-4	-4	-3	0	0	-4	4	6	-4	-3	-2
2	0.01765	4	-1	-4	-4	-3	-3	-3	-3	-4	0	-2	-3	-2	-4	-3	-1	-1	-5	-4	4	1	0	0	1	0	1.57	-0.146	-0.733	-0.591	-1.302	0.012916	-4	-5	-5	-6	-4	-5	-5	-5	-3	-2	-1	-5	-2	8	-6	-4	-4
2	0.017419	4	-3	-2	-3	-3	-3	-3	3	-3	-4	-4	-3	-3	-4	-3	4	-1	-4	-4	-3	1	0	0	1	0	1.57	-0.146	-0.733	-0.591	-1.302	0.014033	0	-4	-4	-5	2	-4	-4	0	-4	1	4	-4	3	0	-4	-2	-3
2	0.23274	0	0	-1	2	-5	-1	4	-1	0	-5	-2	-2	-1	-5	0	1	1	-5	-5	-3	0	0	1	0	1	0.113	-0.837	1.477	1.357	-1.453	0.19591	0	-2	-1	1	0	2	0	-1	-1	1	-4	0	-2	-5	5	0	0
2	0.60039	1	2	2	-1	-4	0	-2	-3	-1	1	-1	3	-2	-4	-3	-2	2	-4	-3	0	0	0	1	0	1	0.44	2.897	1.502	1.538	-0.055	0.6348	3	-3	1	-1	1	0	1	2	-1	-4	-2	-2	-3	-4	0	1	-2
2	0.90495	0	-3	2	4	-4	-1	2	-1	-3	-2	-2	-1	-4	-1	1	1	-1	-4	0	-4	0	0	1	0	1	-0.259	-3.242	-3.656	1.05	0.302	0.87604	-1	-1	-3	2	1	0	3	1	-4	0	-1	-1	-4	1	0	0	0
2	0.015742	-3	-4	-5	-5	-3	-4	-5	-1	-4	4	3	-4	1	3	-5	-4	-3	1	0	3	1	0	0	1	0	1.266	-0.912	-1.505	-1.019	-0.987	0.018585	-3	-4	-4	-5	-3	-3	-4	-5	-4	5	1	-4	6	-2	-4	-4	-1
2	0.12528	5	-3	-3	-4	-3	-3	-3	0	-4	-3	0	-3	-3	-4	1	0	1	-5	-4	-2	1	0	0	1	0	1.57	-0.146	-0.733	-0.591	-1.302	0.1205	1	-3	-1	-2	-3	-2	-2	1	-3	-4	-5	-2	-4	-4	-3	6	-1
2	0.030799	-4	-4	-5	-5	-5	-4	-5	-5	-1	-3	-2	-4	-2	7	-5	-4	-4	0	8	-3	1	0	0	1	0	-0.838	1.512	3.097	0.26	0.83	0.028372	-3	-5	-5	-6	-1	-4	-5	-6	-5	5	4	-5	0	-2	-5	-4	-3
2	0.036631	1	1	1	-3	-2	1	-2	1	2	-3	2	-2	-1	-2	-4	0	-1	1	0	-3	1	0	0	1	0	1.266	-0.912	-1.505	-1.019	-0.987	0.033402	-1	-4	-4	-5	-4	-2	-4	-4	-2	1	2	-4	4	6	-4	-4	-3
2	0	0	0	0	0	0	0	0	0	0	0	0	0	0	0	0	0	0	0	0	0	0	0	0	0	0	0	0	0	0	0	0	0	0	0	0	0	0	0	0	0	0	0	0	0	0	0	0	0
2	0.096824	-4	-1	2	-4	-5	-3	-4	-5	3	-1	-3	-4	-3	4	-5	-3	-4	-1	8	-1	0	1	0	1	0	-0.397	0.412	1.891	-1.006	-0.59	0.11702	-2	-1	-3	-4	5	2	0	-3	0	0	-1	0	-3	-1	1	0	1
2	0.70096	0	-1	-1	2	-3	-2	-1	1	5	-3	-2	-2	-3	-3	-3	4	1	-4	-3	-2	0	0	1	0	1	0.67	-2.647	-4.76	-0.228	1.399	0.66959	1	-3	3	-2	-3	-1	-1	0	-3	-1	-1	-1	-1	2	-1	1	3
2	0.63338	-1	-3	-4	-4	-3	2	-1	-4	-4	1	4	-2	1	-1	-1	-3	0	-4	-3	3	0	0	1	1	0	1.266	-0.912	-1.505	-1.019	-0.987	0.60191	-3	-3	-2	1	-4	-2	1	2	2	0	-2	1	0	0	0	2	1
2	0.57632	0	-1	0	3	-2	1	4	0	-2	-1	-3	-1	-3	-4	1	0	-1	-2	-3	-3	1	0	0	0	1	0.113	-0.837	1.477	1.357	-1.453	0.50981	0	0	0	2	-4	1	2	2	1	-2	-3	-1	-3	-3	-2	1	0
2	0.25504	0	-2	2	2	-4	0	3	-1	-3	-4	-4	-1	-4	-4	-1	2	2	-5	-2	-1	0	0	1	1	0	0.67	-2.647	-4.76	-0.228	1.399	0.18786	-2	4	0	-1	-4	4	-1	-1	-1	-2	-4	2	-3	-4	-1	0	1
2	0.2387	-1	4	-2	-2	-6	-2	-2	0	-1	-4	-4	2	-1	-4	4	0	-1	-6	0	-2	0	0	1	0	1	0.44	2.897	1.502	1.538	-0.055	0.2225	0	-4	-3	-4	0	-4	-4	7	-5	-6	-5	-3	-5	-6	-5	-3	-3
2	0.52787	2	1	-1	1	-1	-1	0	-2	-3	-3	-1	-2	-2	2	1	1	1	1	0	-1	0	0	1	0	1	1.57	-0.146	-0.733	-0.591	-1.302	0.55634	0	3	2	0	-3	3	1	-2	-1	-3	-2	0	-3	-4	0	1	-1
2	0.030196	-3	-2	0	-4	-1	2	-2	-5	2	-1	5	-4	1	-2	-5	-3	-1	2	-2	-1	1	0	0	1	0	-0.169	0.933	1.299	0.945	0.828	0.035227	7	-4	-4	-4	-3	-3	-3	-1	-4	-4	-4	-3	-3	-5	-3	-1	-2
2	0.19196	-1	-1	-3	-1	-3	4	-3	-5	-2	2	1	-4	0	4	-3	-3	-1	-1	-2	1	1	0	0	1	0	0.393	0.816	2.131	-1.239	-0.547	0.19096	3	1	-1	0	-3	-1	2	-1	-1	-4	-3	1	-3	-5	-2	1	1
2	0.16273	1	0	4	2	-4	2	1	-1	0	-5	-5	-1	-3	-6	-3	2	1	-6	-5	-4	0	0	1	0	1	-0.169	0.933	1.299	0.945	0.828	0.17172	-2	-3	-5	-5	-5	4	-4	-6	-2	0	4	-3	5	-3	-5	-3	0
2	0.26281	-2	6	-2	-2	-5	2	0	-3	-1	-4	-3	4	-2	-5	-2	-2	-3	-5	-3	-4	1	0	0	0	1	0.44	2.897	1.502	1.538	-0.055	0.26468	2	-3	-2	-3	-4	5	-2	0	-2	-2	2	-2	2	-1	-4	-2	-1
2	0.11425	2	2	0	-3	0	2	1	-1	3	-3	-2	2	-1	-2	-3	0	-2	-5	-2	0	1	0	0	0	1	0.44	2.897	1.502	1.538	-0.055	0.096747	-4	-5	-5	-6	2	-5	-5	-6	-5	1	5	-5	1	3	-5	0	-2
2	0.042911	-3	-5	-6	-6	1	-5	-5	-6	-3	-1	-1	-4	-3	7	-2	-5	-4	0	6	0	0	0	1	1	0	-0.838	1.512	3.097	0.26	0.83	0.035717	2	1	1	-5	-4	-3	-4	-5	0	-2	-1	0	-3	1	-4	-2	1
2	0.006126	-2	-4	-2	-3	0	-3	-3	-2	-4	-5	-5	-3	-4	-5	-4	7	-1	-5	-4	-4	0	0	1	1	0	0.67	-2.647	-4.76	-0.228	1.399	0.004502	1	-5	-4	-5	-4	-4	-4	-4	-4	0	0	-4	3	5	-5	3	0
2	0.12652	-2	-3	-4	-4	-4	3	0	-5	-4	6	-1	-3	0	-3	-4	-4	-1	-5	-4	1	1	0	0	1	0	-0.503	-1.853	-3.005	0.931	-0.179	0.10428	-3	-1	-2	-1	-6	0	7	-4	-2	-6	-5	-1	-4	-6	-3	-2	-3
2	0.41186	3	1	-2	-2	-4	-1	0	-2	-1	-4	-2	-1	-3	-3	3	1	2	-6	-4	0	0	0	1	0	1	0.421	-1.392	-1.628	0.189	2.081	0.25941	4	1	-2	0	-3	-2	-1	2	-1	-3	-2	-1	-3	-5	-1	1	0
2	0.012121	-2	-6	-6	-6	-3	-5	-6	-6	-6	3	2	-5	0	-3	-6	-3	-2	-5	1	6	0	1	0	1	0	0.393	0.816	2.131	-1.239	-0.547	0.008768	1	-5	-6	-6	-1	-5	-6	-2	-6	4	2	-5	3	0	-5	-4	-1
2	0.011174	6	-5	-4	-4	-1	-4	-4	3	-5	-3	-4	-4	0	-5	-4	-2	0	-6	-5	0	1	0	0	1	0	1.57	-0.146	-0.733	-0.591	-1.302	0.009816	4	-5	-5	-6	5	-5	-5	-3	-5	1	2	-5	0	-3	-5	-2	-3
2	0.038373	2	0	-3	-2	-5	2	2	3	-2	-4	-3	-2	-1	1	0	-1	-2	-4	-3	-4	0	1	0	1	0	1.045	2.064	1.33	-0.384	1.652	0.034521	4	-4	-5	-5	-1	-4	-4	-3	-4	0	4	-5	1	-4	-5	-3	-1
2	0.434	-1	1	-1	4	-6	4	3	-4	-2	-5	-4	3	-4	-5	-4	-2	-3	-6	-5	-5	1	0	0	0	1	-0.503	-1.853	-3.005	0.931	-0.179	0.42763	2	2	-3	-3	-3	4	3	-4	-2	0	-2	-1	3	-4	-4	-3	-3
2	0.18363	-2	4	-2	-1	-6	0	1	2	-3	-6	-5	5	-4	-6	-4	-1	-2	-6	-5	-5	1	0	0	0	1	-0.277	1.648	0.533	1.831	-0.561	0.22295	-1	-2	-2	3	-4	-1	3	-2	-3	-3	-4	-1	-4	-5	1	3	3
2	0.022597	-3	-3	-3	2	-6	-1	7	-5	-3	-5	0	-1	-4	-5	-4	-3	-3	-6	-5	-4	1	0	0	0	1	0.113	-0.837	1.477	1.357	-1.453	0.02168	1	-5	-4	-4	1	-3	-1	-3	-3	3	-1	-4	-2	-4	-5	0	-1
2	0.29457	-1	-2	-1	-2	-2	-2	-2	-3	-3	-2	-3	-2	-2	-4	-2	1	7	-4	-3	-1	0	1	0	1	0	0.908	1.313	2.213	-0.032	0.326	0.28567	2	-2	-1	3	-4	0	4	-2	-2	-4	-4	0	-3	-4	2	-1	-1
2	0.04252	-2	-3	-4	-5	-3	-2	-3	-4	-3	0	1	-3	9	-1	-4	-3	-2	-3	-2	-1	1	0	0	1	0	-1.005	1.212	2.219	-0.663	-1.524	0.040682	-3	-4	-5	-5	-3	-4	-5	-5	-5	7	0	-4	0	-1	-4	-4	-2
2	0.55472	-3	-2	3	6	-5	-1	3	-2	-2	-5	-5	-1	-4	-5	-3	-1	-2	-5	-4	-4	0	0	1	0	1	0.113	-0.837	1.477	1.357	-1.453	0.52901	-1	-3	-3	-4	0	-3	-3	-3	-4	4	1	-3	-1	-2	-3	-1	4
2	0.018861	-2	0	-1	-2	-4	8	1	-3	-1	-2	-3	0	-2	-4	-3	-1	-2	-3	-3	-2	0	1	0	0	1	1.242	-1.262	-0.544	-1.337	-0.279	0.016304	-4	-4	-4	-5	-4	-4	-5	-5	-3	-1	-1	-4	2	8	-5	-4	-3
2	0.60692	-1	2	-2	-2	-2	-1	-2	-3	-2	0	2	-1	0	-2	5	-2	-1	-3	-2	-1	0	0	1	0	1	1.266	-0.912	-1.505	-1.019	-0.987	0.60818	-2	-2	-3	-3	4	2	-2	-4	-2	2	2	-2	2	1	-3	-2	-2
2	0.04135	-2	4	-2	-3	-5	-1	-2	-4	3	-5	-4	6	-3	-4	-3	-2	-3	-4	1	-4	0	0	1	0	1	-0.277	1.648	0.533	1.831	-0.561	0.035638	-1	-4	0	-2	-5	-4	-4	7	-4	-6	-6	-4	-5	-5	-4	-2	-2
2	0.079328	-1	1	0	0	-4	2	2	-4	0	2	0	1	-2	-2	-4	-1	0	-2	-1	0	0	0	1	1	0	0.113	-0.837	1.477	1.357	-1.453	0.062224	4	-4	-3	-4	-2	-3	-4	5	-4	-2	-4	-3	-2	-4	-4	-1	0
2	0.16514	-3	-4	-5	-5	-4	-4	-5	-5	-4	2	2	-4	7	6	-5	-4	-3	-2	1	-1	1	0	0	1	0	-0.397	0.412	1.891	-1.006	-0.59	0.17562	0	2	-1	2	-4	0	3	-3	-3	-2	0	2	-1	-3	-2	-1	-2
2	0.081001	1	-5	-5	-5	-1	-4	-5	-5	-5	2	1	-4	-1	-1	-5	-3	-1	1	-1	6	0	1	0	1	0	1.242	-1.262	-0.544	-1.337	-0.279	0.052176	-2	-5	-5	-4	-1	-5	-5	-6	-5	6	2	-5	-1	-3	-5	-4	-1
2	0.34103	-2	-2	0	-1	5	0	-3	-3	1	-3	0	-3	0	1	1	0	0	4	4	-1	0	0	1	1	0	-0.838	1.512	3.097	0.26	0.83	0.3762	0	1	0	-1	-1	1	-1	-1	0	-1	1	1	-1	-1	-1	1	0
2	0.38521	-2	-2	1	2	-1	-2	1	5	-1	-5	-3	0	1	-5	0	0	-2	-5	-5	-2	0	0	1	0	1	1.045	2.064	1.33	-0.384	1.652	0.30845	-2	0	0	1	-5	3	3	1	1	-2	-5	3	-1	-1	-4	-2	-1
2	0.54963	-1	-1	-1	-1	-4	-2	0	-5	-4	2	2	1	2	-2	-4	0	3	-5	-4	1	0	0	1	0	1	0.393	0.816	2.131	-1.239	-0.547	0.58126	-1	0	3	4	-5	-1	1	0	2	-3	-6	-1	-5	-6	2	1	0
2	0.59435	-2	-1	0	5	-2	1	2	-2	-4	-3	-1	1	-2	-5	-1	1	0	1	-4	-4	0	0	1	0	1	-0.259	-3.242	-3.656	1.05	0.302	0.59579	-1	-3	0	-4	-5	0	-1	5	0	-2	-4	-3	-3	-5	0	1	0
2	0.24581	-1	-2	-4	-4	1	-2	-1	-5	-3	0	0	-4	1	1	4	-4	-3	-3	6	1	0	0	1	1	0	-0.838	1.512	3.097	0.26	0.83	0.23472	0	-4	1	7	0	-3	-1	0	0	-2	-5	-3	-5	-6	-2	-1	-2
2	0.32314	-2	4	-1	-1	-2	2	1	-1	-1	-5	-2	5	-2	-3	-4	0	-2	-5	-4	-3	1	0	0	0	1	-0.277	1.648	0.533	1.831	-0.561	0.34187	-3	2	0	-1	-5	2	3	-2	0	-2	0	2	0	-2	2	0	-3
2	0.36604	-3	-1	-5	-2	-4	-4	-4	-5	-4	5	2	-4	1	-3	-5	-2	-3	-4	1	3	1	0	0	1	0	1.242	-1.262	-0.544	-1.337	-0.279	0.35305	0	1	0	-1	-5	1	1	2	-1	-2	-2	3	0	-5	-4	1	-2
2	0.13057	-2	-1	-4	-5	-2	-3	-3	-2	4	2	0	0	0	2	-5	-1	0	5	4	0	1	0	0	1	0	0.393	0.816	2.131	-1.239	-0.547	0.13346	-1	-1	0	4	-2	2	3	-3	0	-5	-4	2	-3	-4	-4	0	0
2	0.23287	0	1	1	0	-4	-1	0	4	-3	-4	-5	2	-3	-5	0	0	1	-1	-1	-3	0	0	1	0	1	1.045	2.064	1.33	-0.384	1.652	0.21507	-1	1	3	4	-5	-1	-1	-2	-1	-4	-2	3	-1	-4	-2	0	0
2	0.42265	0	-4	-5	-6	-3	-3	-5	-5	-5	4	0	-2	1	1	-5	-4	-2	-4	0	5	0	1	0	1	0	1.242	-1.262	-0.544	-1.337	-0.279	0.37965	-2	0	-1	0	-5	1	5	-3	-2	-3	-4	4	-3	-5	-2	-1	1
2	0.048587	-4	6	-2	2	-2	-3	-3	-5	-4	0	-1	-2	-2	-4	-5	-3	-3	6	-3	0	0	0	1	1	0	1.266	-0.912	-1.505	-1.019	-0.987	0.053136	-1	-5	0	-5	3	-2	-5	-4	-5	3	0	-4	-1	-4	1	-2	-1
2	0.10132	4	-4	-1	-3	-1	-2	-3	-2	-1	-3	-4	-3	-1	-4	-4	5	-1	-5	-4	-1	1	0	0	1	0	1.57	-0.146	-0.733	-0.591	-1.302	0.11711	-2	3	-3	-4	-3	1	-1	-4	1	2	2	3	1	-3	-5	-1	-2
2	0.063925	-4	7	-2	3	-6	-1	-2	-5	-1	-6	-5	-1	-4	-5	-5	-3	-4	6	-3	-5	0	0	1	0	1	-0.259	-3.242	-3.656	1.05	0.302	0.068494	0	-5	-5	-6	3	-3	-5	-5	-5	3	0	-5	-2	-3	-5	-4	-2
2	0.077287	-3	-3	-1	-1	-6	0	7	-4	-3	-6	-6	-2	-5	-6	-4	-2	-3	-6	-5	-5	1	0	0	1	0	0.113	-0.837	1.477	1.357	-1.453	0.071442	3	-4	-4	-5	-2	-2	-4	-3	-5	2	1	-4	4	-4	-4	-1	1
2	0.040782	2	-3	4	-3	0	-3	-3	-1	-3	-5	-5	-3	-4	-5	-4	5	-1	-5	-4	-4	1	0	0	1	0	0.67	-2.647	-4.76	-0.228	1.399	0.032986	-4	-5	-6	-6	-4	-5	-5	-6	-5	4	5	-5	1	-1	-5	-5	-3
2	0.34728	6	-4	-3	-4	-3	-3	-3	-1	-4	-4	-4	-3	-4	-5	-3	3	-2	-5	-4	-3	1	0	0	1	0	0.67	-2.647	-4.76	-0.228	1.399	0.34651	-1	4	0	3	-5	0	0	-3	0	-4	-2	3	-1	-5	-2	-1	1
2	0.19895	-2	-1	-4	-5	-5	-2	-5	-4	-2	1	2	2	1	5	-4	-3	-4	7	-2	-3	0	0	1	0	1	-0.397	0.412	1.891	-1.006	-0.59	0.19036	-2	-2	0	-2	-5	-4	-3	7	-2	-4	-6	-4	-5	-6	-3	-2	-3
2	0.39243	-1	-2	0	-3	-3	-2	-2	-3	-3	0	-2	0	-2	-4	-1	0	6	-5	-4	0	0	0	1	0	1	0.908	1.313	2.213	-0.032	0.326	0.38243	-3	-3	2	7	-6	-3	1	-4	1	-5	-5	-2	-5	-4	-2	-2	-3
2	0.91803	0	0	-2	0	3	-2	-2	1	-3	0	1	-2	1	-2	2	2	-1	-3	-3	-1	0	0	1	0	1	0.67	-2.647	-4.76	-0.228	1.399	0.91386	3	3	-2	-2	-2	2	-1	0	2	-3	-3	-1	-2	-3	-2	1	-1
2	0.016736	1	-4	-5	-5	-2	-4	-4	-5	-5	5	2	-5	2	-2	-5	-3	0	-5	-2	3	1	0	0	1	0	0.393	0.816	2.131	-1.239	-0.547	0.011293	-1	0	2	3	1	2	5	-4	-1	-4	-3	-1	-2	-4	-4	-1	0
2	0.01882	2	-4	-2	-3	0	-3	-3	-1	-4	-4	-4	-3	-4	-5	-3	4	5	-5	-4	-3	1	0	0	1	0	0.67	-2.647	-4.76	-0.228	1.399	0.017868	-3	-1	-2	4	-6	1	6	-4	-2	-6	-6	0	-5	-6	-4	-3	-3
2	0.057689	3	-4	-3	-3	1	-3	-3	3	-4	-4	-2	-3	-3	-5	-3	4	0	-5	-4	-2	1	0	0	1	0	0.67	-2.647	-4.76	-0.228	1.399	0.069961	6	-4	-3	-4	2	-3	-3	-1	2	-3	-4	-3	-2	-4	-3	0	0
2	0.4323	4	1	0	-3	5	-2	-1	-2	-3	-1	-2	-1	-2	-3	-1	0	-2	-4	-3	1	1	0	0	1	0	1.57	-0.146	-0.733	-0.591	-1.302	0.3925	3	-2	-3	-1	0	-1	-2	-1	-3	0	2	-1	-2	-3	1	1	-1
2	0.95794	0	0	2	1	-4	-2	3	1	-1	-3	-3	0	-4	-4	-1	2	0	-5	0	-3	0	0	1	0	1	0.67	-2.647	-4.76	-0.228	1.399	0.96131	2	-1	0	2	1	-2	-2	2	-1	-3	-3	-1	-4	1	0	1	-3
2	0.70389	3	-2	0	-2	-1	-1	-1	1	-2	-2	1	-1	-1	-2	-1	1	-1	-3	-2	0	0	0	1	0	1	1.57	-0.146	-0.733	-0.591	-1.302	0.62559	1	-1	1	3	-3	0	2	1	-2	-3	-2	1	-2	-3	0	0	-1
2	0.23079	-1	-1	-4	-5	-2	-2	-1	-5	-2	1	2	-2	6	3	-1	-2	-3	-4	-1	0	0	1	0	1	0	1.266	-0.912	-1.505	-1.019	-0.987	0.24471	-2	3	-3	0	0	-2	0	-5	0	-2	0	3	2	-1	-4	-2	2
2	0.76587	-1	-2	0	0	-5	3	-2	4	-4	-1	-3	-2	1	0	2	0	-3	-5	0	-2	0	0	1	0	1	1.045	2.064	1.33	-0.384	1.652	0.76514	-2	4	2	-1	-5	-1	-2	-1	4	0	-2	-2	3	-1	1	0	-2
2	0.3237	-3	-4	-4	-4	1	-2	-1	-5	-4	1	4	-1	3	2	-2	-4	-3	-3	2	1	1	0	0	1	0	1.266	-0.912	-1.505	-1.019	-0.987	0.29871	0	-3	4	2	-4	0	2	-2	1	-4	-4	-1	-4	-5	1	2	0
2	0.57344	1	0	1	2	-3	2	0	-3	0	-3	-3	3	-3	-3	-2	-1	2	-3	-3	-2	0	0	1	0	1	-0.277	1.648	0.533	1.831	-0.561	0.53296	0	-2	2	4	-3	0	1	-1	-2	-3	-3	-1	-3	-2	1	1	0
2	0.19741	-2	-2	5	5	-5	-1	2	-2	-1	-5	-5	-2	-4	-5	-4	0	-2	-5	-4	-3	0	1	0	0	1	-0.169	0.933	1.299	0.945	0.828	0.15739	-4	-4	-5	-5	0	-4	-5	-5	-2	-2	-2	-4	-2	6	-5	-4	-4
2	0.23971	-3	-1	-4	-4	-5	-1	-1	-4	-4	-1	-3	1	-4	-5	7	-1	-1	-5	0	-4	0	1	0	1	0	0.421	-1.392	-1.628	0.189	2.081	0.28274	-4	-5	-2	-5	-4	-5	-5	-6	-5	7	1	-5	2	-2	-5	-5	-3
2	0.26593	-1	2	0	-3	4	-1	-2	-4	1	-1	-4	3	-3	-4	0	1	1	-4	1	0	0	1	0	0	1	-1.02	-0.255	-0.862	-1.343	0.465	0.29597	1	-4	-4	-5	-4	-4	-4	-4	3	-3	-3	-4	-3	4	-5	-2	-2
2	0.016342	0	-5	-3	-6	-2	-5	-5	-6	-6	6	0	-5	0	-3	-5	-3	-3	-5	-4	4	0	1	0	1	0	0.393	0.816	2.131	-1.239	-0.547	0.018175	-4	6	-3	-3	0	0	-2	-5	-3	-4	-4	5	-3	-5	-5	-3	-4
2	0.020535	-4	-5	-6	-6	-2	-3	-6	-6	-6	4	5	-5	2	-1	-6	-5	-2	-5	-4	2	0	1	0	1	0	1.242	-1.262	-0.544	-1.337	-0.279	0.021015	-5	-6	-6	-7	-5	-3	-6	-5	-4	-6	-5	-6	-4	-1	-6	-5	-5
2	0.22225	-2	-2	-2	-3	-2	-1	-1	-4	-2	-1	-3	1	-2	-4	0	1	6	-5	-3	0	0	1	0	0	1	0.908	1.313	2.213	-0.032	0.326	0.16978	-4	-5	-6	-6	3	-4	-5	-5	-5	1	5	-5	0	3	-5	-5	-4
2	0.083767	-5	-5	-3	-5	1	-4	-5	-5	5	0	-2	-6	-3	7	-6	-4	-4	1	4	-2	0	1	0	1	0	-0.838	1.512	3.097	0.26	0.83	0.074076	-2	-4	4	-2	0	-3	-3	-3	3	-6	-5	-3	-3	-5	-4	6	0
2	0.27535	4	0	-2	-5	3	-1	-1	0	0	0	-2	-1	0	-1	0	0	0	-5	-1	0	0	1	0	1	0	1.57	-0.146	-0.733	-0.591	-1.302	0.2888	-1	-1	-4	-2	1	-2	-1	-2	-5	3	2	-4	0	-1	-5	2	2
2	0.092529	-1	-2	0	-2	-1	-1	-4	-2	1	1	0	-1	0	2	-2	-1	0	1	4	3	0	1	0	1	0	1.242	-1.262	-0.544	-1.337	-0.279	0.094121	-1	-2	-2	-2	-4	-2	-2	-3	-5	5	1	1	0	0	-5	-1	-1
2	0.1114	0	-4	-2	-5	-2	-4	-4	-5	-1	3	1	0	1	-1	-2	-2	-1	-4	0	4	1	0	0	1	0	1.242	-1.262	-0.544	-1.337	-0.279	0.12621	-1	-1	2	3	-5	1	4	-2	-1	-4	-4	1	-2	-2	-1	0	-2
2	0.021052	-1	-6	-6	-6	1	-5	-6	-6	-6	6	2	-5	-1	-3	-6	-5	-3	-3	-4	4	0	1	0	1	0	0.393	0.816	2.131	-1.239	-0.547	0.024324	-4	6	-1	-4	-3	-1	-2	-5	-1	-3	-5	5	-3	-5	-5	-3	-4
2	0.63825	0	-1	1	-1	-3	0	1	-1	-3	-3	0	-2	-3	-3	1	1	3	-4	1	0	0	0	1	0	1	0.908	1.313	2.213	-0.032	0.326	0.62828	0	2	0	-1	-4	0	2	-2	0	0	-3	3	-3	-2	3	-2	-3
2	0.84016	5	-2	-2	-2	-1	-2	-2	-1	-2	-2	-2	-2	-2	-3	-2	2	-1	-4	-3	-1	0	0	1	0	1	1.57	-0.146	-0.733	-0.591	-1.302	0.83562	1	-3	-2	-3	-3	-3	-3	6	-3	-3	0	-3	-2	-3	-3	-1	-2
2	0.84251	-2	-1	1	1	-2	0	-2	-1	-2	-2	-2	-1	-4	-3	6	1	-1	-5	-3	-3	0	0	1	0	1	-0.169	0.933	1.299	0.945	0.828	0.82385	-2	0	3	2	-5	1	1	-1	-1	-4	-4	2	-3	0	1	1	-1
2	0.15038	-1	-4	-5	-5	-1	-4	-5	-5	-5	4	3	-1	0	-2	-5	-4	0	-5	-3	4	1	0	0	1	0	0.393	0.816	2.131	-1.239	-0.547	0.14973	-4	-5	-5	-6	-5	-5	-6	-5	-3	-2	-1	-5	-2	9	-6	-4	-4
2	0.15166	-2	-1	2	-2	-2	-2	-4	6	0	-5	-3	-3	-3	-2	-4	-2	-1	-4	-3	-4	0	0	1	0	1	1.045	2.064	1.33	-0.384	1.652	0.14717	-3	-4	-4	-5	1	-4	-5	-5	0	-3	-1	-5	1	6	-5	-4	-4
2	0.15244	6	-4	-3	-3	-3	-3	-3	-1	-4	-4	-4	-3	-3	-4	-3	0	-2	-5	-1	-3	1	0	0	1	0	1.57	-0.146	-0.733	-0.591	-1.302	0.15115	-4	-4	-1	7	-6	-2	3	-4	-3	-5	-6	-3	-4	-6	-4	-2	-3
2	0.07599	-2	1	-1	0	-5	2	-2	-1	-1	3	2	-2	-1	1	-5	-1	-2	-5	1	0	1	0	0	1	0	1.266	-0.912	-1.505	-1.019	-0.987	0.093089	-2	2	2	0	-5	3	-1	-3	0	0	-2	2	-1	-1	-3	1	1
2	0.11125	-1	0	0	0	-1	2	3	-2	2	0	-2	-1	-1	-2	-5	0	2	-5	-2	0	0	1	0	0	1	0.113	-0.837	1.477	1.357	-1.453	0.09853	-1	-5	-5	-6	1	-5	-5	-6	1	5	2	-5	1	0	-5	-3	-2
2	0.031331	1	0	1	-3	-1	0	-2	1	6	-1	-1	2	-2	-2	-4	-1	0	-4	-2	-2	1	0	0	0	1	-1.474	-0.078	-1.673	0.336	-0.417	0.027412	0	4	1	0	-1	2	0	-2	0	-3	-2	4	-2	-4	-3	-1	-2
2	0.18813	1	1	-3	-5	1	-4	-4	-4	-2	4	0	-2	1	-1	-3	0	3	-5	-4	0	0	0	1	1	0	0.393	0.816	2.131	-1.239	-0.547	0.20095	2	-2	-1	-4	-3	-3	-4	-2	-4	0	-3	-3	-2	-5	-3	0	6
2	0.020896	0	-4	-3	-3	-5	0	-5	-2	4	3	2	-5	2	1	-5	-2	-2	-5	-4	2	1	0	0	1	0	0.393	0.816	2.131	-1.239	-0.547	0.019992	2	-5	-5	-5	-2	-5	-5	-1	-5	3	1	-5	-1	3	-4	1	1
2	0.64752	-2	-1	-3	-4	-5	2	-2	-3	1	2	1	-1	-1	0	0	-2	-2	-5	1	3	0	1	0	1	0	-0.838	1.512	3.097	0.26	0.83	0.6517	0	1	-2	-2	-5	0	2	-2	-1	1	-2	1	0	-2	2	-1	0
2	0.66812	0	-2	-1	2	0	-1	2	0	-1	-2	-3	1	-4	-5	2	1	1	-5	-4	0	0	0	1	0	1	-0.169	0.933	1.299	0.945	0.828	0.58951	0	-2	1	4	-3	0	3	1	-2	-4	-4	1	-3	-5	2	0	0
2	0.012966	3	-1	-2	-3	-2	3	-2	4	-2	-5	-5	-1	-2	-4	-5	-1	-3	-6	-4	-4	1	0	0	1	0	-0.503	-1.853	-3.005	0.931	-0.179	0.017288	-5	-3	-6	-7	-3	-4	-5	-7	-1	2	5	-5	1	1	-6	-5	-4
2	0.14383	-3	5	2	-3	-5	-1	-1	-2	-3	-5	-5	4	-2	-5	0	-1	-2	-5	-4	-2	0	0	1	0	1	0.44	2.897	1.502	1.538	-0.055	0.11164	-3	0	1	-5	-4	-3	-3	-5	-4	1	4	-4	3	1	-2	-3	-3
2	0.059796	-3	-5	-6	-6	-3	-5	-5	-6	-6	5	1	-5	-1	-3	-1	-4	-3	-5	-4	6	1	0	0	1	0	0.393	0.816	2.131	-1.239	-0.547	0.047304	1	1	-2	-4	-4	-3	-4	6	-2	-5	-5	-1	-4	-5	-4	1	-3
2	0.007128	-2	-5	-3	-4	-5	-4	-5	7	-4	-6	-6	-4	-5	-6	-5	-3	-4	-5	-6	-6	1	0	0	1	0	1.045	2.064	1.33	-0.384	1.652	0.006304	0	-5	-1	-5	1	-4	-5	-5	-5	3	0	-4	0	-3	-5	-4	-2
2	0.10769	-2	-4	-4	-4	-3	-3	-4	-4	-4	6	0	-3	-1	-2	-3	-1	-2	-4	-3	4	0	1	0	1	0	0.393	0.816	2.131	-1.239	-0.547	0.092049	3	-3	1	0	0	0	-2	3	-2	-3	-2	-2	1	-1	-3	0	-2
2	0.034223	1	2	2	2	-3	2	2	-2	0	-2	-3	2	0	-5	-5	0	-1	-4	-3	-4	1	0	0	0	1	1.57	-0.146	-0.733	-0.591	-1.302	0.043413	-1	-1	-2	-3	-1	4	-1	-4	-3	0	4	0	3	-2	-5	-1	-1
2	0.044244	-1	-1	3	4	-3	1	2	0	1	-6	-4	1	-4	-3	-4	0	0	-6	-1	-4	0	0	1	0	1	-0.169	0.933	1.299	0.945	0.828	0.039258	-3	-4	3	2	-2	0	-2	-4	4	0	-1	-3	-3	4	-5	0	-2
2	0.041306	2	1	0	-1	-5	4	4	-2	-2	-4	-3	3	-4	-5	-3	-1	-2	-4	-4	-3	1	0	0	0	1	0.113	-0.837	1.477	1.357	-1.453	0.041558	-2	-1	-3	-4	-2	-2	-3	-4	-1	4	4	0	1	-1	-5	-4	-3
2	0.10348	1	1	2	2	-3	1	2	-2	1	-1	-2	2	-2	-3	-4	-1	-1	-4	-1	-3	1	0	0	0	1	0.113	-0.837	1.477	1.357	-1.453	0.11588	0	0	-3	-3	-2	3	-2	-5	-2	-1	4	1	3	-3	-5	-1	-1
2	0.20265	2	0	-1	-1	-1	4	1	-3	-3	-1	1	1	2	-5	-4	0	-2	-4	-4	-3	0	0	1	0	1	1.57	-0.146	-0.733	-0.591	-1.302	0.18847	-2	-2	2	-1	-5	-1	-1	6	-3	-6	-7	0	-6	-6	-5	-2	-4
2	0.032769	1	1	2	2	-2	2	3	-2	0	-2	-2	2	-1	-3	-5	-1	-2	-6	-2	-3	1	0	0	0	1	0.113	-0.837	1.477	1.357	-1.453	0.036573	0	0	-2	-3	-2	4	-2	-3	-1	0	3	0	4	-2	-5	-2	-2
2	0.089372	-3	-2	2	2	-2	0	-1	-4	3	1	0	-2	-1	3	-3	1	-2	-2	3	-1	0	0	1	1	0	-0.397	0.412	1.891	-1.006	-0.59	0.075229	3	0	-3	0	-3	-2	-1	-1	0	0	-2	-1	-1	-2	3	-1	-1
2	0.032447	-1	-1	2	-2	2	1	-1	-1	2	-1	0	-2	-1	1	-4	1	-1	1	3	-1	1	0	0	1	0	-1.02	-0.255	-0.862	-1.343	0.465	0.024779	-1	0	6	0	-1	0	-1	-1	2	-3	-2	-1	0	-2	-5	0	-1
2	0.19282	1	0	0	-2	-1	2	-1	-3	6	0	1	-1	2	-2	-4	-2	-3	-2	1	-2	1	0	0	0	1	-1.005	1.212	2.219	-0.663	-1.524	0.17252	-2	0	-3	-2	2	-1	-2	-2	8	-1	1	-2	0	-1	-3	-2	-3
2	0.079594	-1	2	-1	-1	0	1	-1	-3	2	1	4	-3	-1	-2	-4	-4	-2	-5	-3	0	0	0	1	1	0	1.266	-0.912	-1.505	-1.019	-0.987	0.066026	4	-5	-5	-5	1	-4	-4	-2	-5	2	-1	-4	3	-1	-4	-1	-2
2	0.14445	5	2	-3	-4	2	-3	-3	-2	-2	-2	-1	-3	-1	-3	-1	-1	-1	-4	-3	1	1	0	0	1	0	1.57	-0.146	-0.733	-0.591	-1.302	0.12268	2	-3	-2	-2	-3	-2	-1	2	2	-4	-4	-3	-4	-4	-3	5	1
2	0.09312	1	-4	-4	-4	-3	0	-3	-2	1	2	0	-4	4	-1	-4	-2	-1	-4	-3	5	1	0	0	1	0	1.242	-1.262	-0.544	-1.337	-0.279	0.082708	4	-4	-3	-4	3	-3	-3	4	-4	-4	-4	-3	-2	-4	-4	2	0
2	0.005831	-4	-5	-6	-6	-1	-5	-6	-4	-4	0	5	-5	0	5	-6	-5	1	-4	-1	-1	0	1	0	1	0	1.266	-0.912	-1.505	-1.019	-0.987	0.00513	-2	-5	-2	-4	-3	-5	-5	7	-5	-7	-7	-4	-6	-6	-5	-3	-4
2	0.041348	1	0	4	1	-5	2	2	0	-2	-3	-3	-2	-2	-1	-1	0	-1	-2	-2	-3	1	0	0	0	1	-0.169	0.933	1.299	0.945	0.828	0.043329	0	4	1	0	-3	1	2	-2	-2	-5	-4	2	-2	-2	-1	-1	-2
2	0.063472	2	-1	-3	-2	-4	-2	-3	2	1	1	-2	-4	0	-3	-4	0	2	-5	-3	3	0	1	0	1	0	0.908	1.313	2.213	-0.032	0.326	0.069877	3	3	0	0	-1	-1	-1	0	0	-5	-5	3	-3	-5	2	-2	-1
2	0.67101	-1	-2	-1	0	-3	0	1	-2	0	-4	-3	0	-4	-4	6	1	-1	-6	-3	-1	0	0	1	0	1	-0.277	1.648	0.533	1.831	-0.561	0.67039	2	0	1	2	-2	1	3	-1	-2	-3	-4	0	-2	-5	-2	2	0
2	0.046213	-3	-5	-4	-5	10	-4	-5	-4	2	-2	-1	-4	2	-1	-5	-3	-3	-4	-1	-1	1	0	0	1	0	-1.02	-0.255	-0.862	-1.343	0.465	0.035356	-4	-4	-5	-5	-4	-5	-5	-2	-3	-2	-2	-5	-2	9	-5	-4	-4
2	0.29585	-1	2	-1	-2	-5	3	2	-4	6	-1	-2	0	2	-4	-4	-3	-2	-5	-3	-1	1	0	0	0	1	-1.474	-0.078	-1.673	0.336	-0.417	0.20615	-3	-2	-3	0	-6	1	7	-4	-2	-6	-5	-1	-4	-6	-4	-2	-3
2	0.022191	-3	-3	-1	7	-6	0	3	-3	-3	-6	-6	-1	-5	-6	-4	-2	-3	-6	-5	-5	1	0	0	0	1	-0.259	-3.242	-3.656	1.05	0.302	0.022254	-2	-4	-3	-5	-4	-2	-4	-5	-1	4	-2	-4	4	-3	-4	-2	5
2	0	0	0	0	0	0	0	0	0	0	0	0	0	0	0	0	0	0	0	0	0	0	0	0	0	0	0	0	0	0	0	0.253	-2	-2	-3	-4	-2	-2	-3	-4	-3	1	3	-3	8	-1	-4	-3	-2
2	0.85676	-1	1	-1	-1	-1	2	0	1	2	-1	-1	0	-1	-1	0	0	1	-1	2	-1	0	0	1	0	1	-0.503	-1.853	-3.005	0.931	-0.179	0.84593	-1	0	0	3	-1	2	0	-1	4	-1	-1	-1	-1	-1	-1	-1	-1
2	0.83435	2	0	-1	-1	-1	2	0	-1	-1	-1	-1	0	-1	-1	2	0	0	-1	-1	-1	0	0	1	0	1	-0.503	-1.853	-3.005	0.931	-0.179	0.80153	2	-1	-1	-1	-1	-1	-1	-1	-1	-1	-1	-1	-1	1	2	0	-1
2	0.008142	-2	-4	-4	-4	2	-4	-4	-4	-4	2	5	-4	0	2	-4	-3	0	-3	-2	1	1	0	0	0	1	1.266	-0.912	-1.505	-1.019	-0.987	0.00631	2	-3	2	-3	2	1	-3	1	-3	1	-1	-2	1	2	-3	-1	1
2	0.47292	-3	1	-1	-4	-5	2	0	0	-4	0	2	2	2	-4	-5	0	1	-5	-4	1	0	0	1	0	1	-0.277	1.648	0.533	1.831	-0.561	0.47341	1	-4	-4	-5	7	-4	-4	-4	-5	2	0	0	-2	0	0	1	-3
2	0.11547	-3	-4	-4	-3	-5	-3	-3	-4	1	-5	-5	-3	-4	-6	9	-3	-3	-6	-4	-4	0	0	1	1	0	0.421	-1.392	-1.628	0.189	2.081	0.11574	-4	-4	-4	-5	-4	-4	-4	-5	2	0	-2	-4	-2	4	-5	-4	-4
2	0.040561	-2	-5	-5	-5	9	-5	-5	-5	-5	-2	2	-5	-2	1	-5	-1	-3	-4	-3	2	1	0	0	1	0	-1.02	-0.255	-0.862	-1.343	0.465	0.042104	1	-4	-5	-5	3	-4	-5	-1	-3	-2	2	-4	2	5	-5	-3	-3
2	0.057596	-2	-3	1	-1	-1	1	-1	-4	7	0	-3	1	-1	-2	-5	-3	-2	3	2	1	0	0	1	0	1	-1.474	-0.078	-1.673	0.336	-0.417	0.054467	-2	-1	-3	-4	-5	-2	-1	7	-4	-6	-4	-1	-5	-6	-4	-1	-4
2	0.11527	-4	-4	-4	-5	-4	-4	-4	-5	-4	0	3	-1	-1	7	-4	-4	-3	3	0	-2	0	1	0	1	0	1.266	-0.912	-1.505	-1.019	-0.987	0.11056	-2	4	-2	-3	-1	3	-1	-4	-3	2	-3	4	-1	-4	-3	-2	-2
2	0.2224	-1	2	1	2	-6	2	3	-4	0	-5	-5	3	-4	-6	2	0	-2	-4	-3	-4	0	0	1	0	1	-0.503	-1.853	-3.005	0.931	-0.179	0.23664	0	0	-1	1	0	0	2	-3	2	-3	0	1	0	1	-1	-1	0
2	0.053446	-1	-4	-2	-6	0	-5	-4	-6	-3	4	2	-4	0	-2	-5	-4	-1	-5	-4	4	0	1	0	1	0	1.266	-0.912	-1.505	-1.019	-0.987	0.044322	-2	-1	0	0	-4	-3	-1	6	-3	-6	-5	-3	-4	-5	-4	1	-3
2	0.39225	0	-3	-2	-4	-1	-3	-3	-3	0	-2	-3	-3	-4	-2	-2	4	5	-5	-1	-3	0	0	1	1	0	0.908	1.313	2.213	-0.032	0.326	0.36646	0	-2	0	-1	-1	1	-3	6	-2	-6	-6	0	-5	-6	-2	-1	-3
2	0.2647	-4	-4	-4	-5	-4	-4	-4	-5	-3	-2	5	-3	2	1	-3	-4	-3	-2	5	-2	0	1	0	1	0	1.266	-0.912	-1.505	-1.019	-0.987	0.24505	6	-3	-3	-4	-2	-3	-3	-2	-4	-3	-3	-3	-3	-4	-3	-1	0
2	0.084947	-1	-1	3	5	-2	0	1	-1	-3	0	-2	0	-2	-2	-3	-1	0	-4	-4	-3	0	0	1	0	1	-0.259	-3.242	-3.656	1.05	0.302	0.094889	-2	-1	-2	-3	-2	-2	0	-3	1	-1	-1	-1	1	3	-4	0	2
2	0.094889	-2	-1	-2	-3	-2	-2	0	-3	1	-1	-1	-1	1	3	-4	0	2	-3	4	1	0	0	1	0	1	1.242	-1.262	-0.544	-1.337	-0.279	0.11162	3	-1	-3	-3	1	-3	-3	4	-3	0	-3	-3	1	-3	-3	-2	-2
2	0.56231	5	-3	-3	-1	-3	-1	2	-1	-3	-4	-4	0	-3	-4	1	-1	-1	-4	-4	-1	1	0	0	1	0	1.57	-0.146	-0.733	-0.591	-1.302	0.53245	-1	-1	0	-1	6	-3	-2	-4	-4	4	-2	1	0	-2	-4	-2	-1
2	0.21262	-2	-5	-3	-5	-4	-5	-2	-6	-6	7	0	-3	-2	-3	-5	-4	0	-5	-4	1	0	0	1	1	0	0.393	0.816	2.131	-1.239	-0.547	0.23613	-1	-1	0	2	-4	0	0	-3	0	-4	-4	0	-4	-5	2	3	4
2	0.71695	-2	1	-1	-3	0	-3	-2	6	-4	-4	-4	-1	-4	1	0	-3	-3	2	-3	-1	0	0	1	0	1	1.045	2.064	1.33	-0.384	1.652	0.69911	-3	2	-3	-2	-2	1	5	-3	2	-2	-1	1	1	-3	-1	-1	-3
2	0.61776	-2	1	-3	-4	-3	0	-3	-1	-3	1	1	2	1	-1	-3	-3	0	-4	-1	4	0	1	0	1	0	1.242	-1.262	-0.544	-1.337	-0.279	0.61572	-2	5	-3	-3	1	0	-1	-2	2	-4	-1	3	-3	-2	-1	0	-3
2	0.54336	-3	-4	-5	-5	-4	-4	-5	-5	-4	-1	4	-4	4	6	-5	-3	-1	-3	-1	-2	1	0	0	1	0	-0.397	0.412	1.891	-1.006	-0.59	0.5334	-2	0	-1	-2	-5	1	4	3	-2	-3	-4	1	-2	-5	-3	-1	1
2	0.02855	-1	-4	-3	-4	-1	-3	-4	-4	-2	-1	4	-3	1	-2	-4	1	3	-4	-3	0	1	0	0	1	0	1.266	-0.912	-1.505	-1.019	-0.987	0.026892	3	-1	-2	-3	-1	-2	-3	-3	-3	-3	-3	0	-2	-4	-3	1	6
2	0.44347	-1	-2	-1	-3	-3	-1	-2	-2	10	-4	-3	-2	-2	-2	-3	-2	-3	-3	0	-4	1	0	0	1	0	-1.474	-0.078	-1.673	0.336	-0.417	0.41363	2	2	-1	-2	-3	0	-2	1	-2	-2	-2	1	-3	-2	1	1	-2
2	0.3533	-3	-4	-5	-5	-3	-4	-5	-5	-5	5	5	-4	0	-1	-5	-4	-3	-4	-3	0	0	0	1	1	0	1.266	-0.912	-1.505	-1.019	-0.987	0.29225	0	5	-2	-3	-4	-2	-2	0	0	-3	-4	0	-3	-4	-3	-1	5
2	0.24353	-1	-3	-1	-3	-3	-3	-3	-3	-4	-3	-4	-2	-3	-4	-3	4	6	-5	-4	-3	0	0	1	1	0	0.67	-2.647	-4.76	-0.228	1.399	0.20775	2	6	-2	0	-4	0	2	-3	-3	-3	-4	-1	-3	-5	-4	-2	-1
2	0.19374	-1	0	1	0	3	1	0	-1	2	0	-4	0	-4	1	0	0	0	-4	1	0	0	0	1	0	1	0.67	-2.647	-4.76	-0.228	1.399	0.17211	-1	-2	-3	1	-4	-3	-3	5	1	-2	-2	0	-4	-1	0	-1	-3
2	0.23256	-3	-4	-4	-5	3	-3	-4	-5	0	0	-2	-4	-3	1	-5	-3	-3	0	9	-3	1	0	0	1	0	-0.838	1.512	3.097	0.26	0.83	0.19229	-2	-2	-4	-4	-3	-4	-4	-5	-4	4	1	-4	1	-2	-4	-3	1
2	0.41982	0	1	-3	0	3	1	0	0	-4	0	-1	0	2	-4	1	0	0	-5	-4	0	1	0	0	1	0	1.242	-1.262	-0.544	-1.337	-0.279	0.36402	1	-1	4	-1	-3	1	0	0	-2	-3	-1	-2	-2	-3	-3	2	2
2	0.095695	1	-4	-5	-5	-3	-4	-4	-3	-4	-1	5	-4	0	0	-4	-3	-3	-4	-3	-1	0	1	0	1	0	1.266	-0.912	-1.505	-1.019	-0.987	0.082581	1	-4	-5	-5	-3	-4	-4	-4	-5	3	3	-4	0	-2	-4	-3	-2
2	0.099604	-1	-3	2	0	-3	-2	-3	0	-3	-3	-4	-2	-3	-5	-3	2	6	-5	-4	-3	0	0	1	1	0	0.908	1.313	2.213	-0.032	0.326	0.075421	1	-1	-2	-2	-2	3	-1	-3	-2	-2	-3	4	-1	-3	2	0	2
2	0.22219	-3	-4	-5	-5	-2	-4	-4	-5	-5	2	5	-4	1	-2	-4	-3	1	-4	-3	1	1	0	0	1	0	1.266	-0.912	-1.505	-1.019	-0.987	0.25369	-2	-4	-2	-3	-4	-4	-4	7	-4	-6	-6	-3	-5	-5	-4	-2	-4
2	0.22622	-2	-4	4	-1	-5	-3	-3	6	-1	-6	-6	-2	-5	-5	-4	-1	-2	-5	-5	-5	0	0	1	0	1	-0.169	0.933	1.299	0.945	0.828	0.20948	-2	0	1	1	-4	-1	-1	4	-3	-3	-1	0	1	-4	-4	0	-1
2	0.00975	-2	-3	-2	-3	-3	-3	-3	-4	-4	-3	-4	-1	-2	-4	-3	2	7	-6	-3	-3	0	0	1	1	0	0.908	1.313	2.213	-0.032	0.326	0.011814	-1	-6	-6	-6	-1	-6	-6	-6	-6	6	0	-6	0	-2	-5	-4	-3
2	0.003365	-3	2	3	-2	-1	2	-2	2	1	-6	-5	5	-3	-4	-2	-1	-2	-3	-2	-5	0	0	1	0	1	-0.277	1.648	0.533	1.831	-0.561	0.004538	-2	-3	-2	-4	-2	-2	-3	-5	-4	-1	0	-2	0	-4	-4	2	6
2	0.13148	-4	-5	-6	-6	-5	-5	-5	-6	-4	0	6	-5	1	3	-4	-5	-4	0	2	-2	0	1	0	1	0	1.266	-0.912	-1.505	-1.019	-0.987	0.086878	-2	1	0	3	-5	2	3	-3	-2	-2	-3	2	-3	-5	-2	0	2
2	0.48223	0	0	0	0	-1	0	-1	1	0	0	0	0	0	-1	0	1	1	-1	-1	-1	0	0	1	0	1	0.67	-2.647	-4.76	-0.228	1.399	0.50114	0	0	0	0	-1	1	0	-1	2	0	-1	1	-1	-1	0	0	1
2	0.62352	-2	2	-1	-2	-5	3	3	-3	-3	2	-2	2	3	-4	-4	0	-1	-5	-4	0	0	1	0	0	1	0.44	2.897	1.502	1.538	-0.055	0.60099	3	-4	-1	-3	-4	-3	-2	-1	-4	2	-2	-2	-3	1	4	0	-1
2	0.46562	-3	-4	-5	-5	0	-4	-5	-5	-5	3	5	-4	1	-2	-3	-3	-3	-4	-2	1	0	0	1	1	0	1.266	-0.912	-1.505	-1.019	-0.987	0.48797	-3	-3	-4	-4	-4	-3	-4	-3	0	-4	-4	-3	-3	-1	5	-3	-3
2	0.5074	-1	-4	-3	-3	-2	-4	-4	6	-4	-3	0	-3	-3	2	-4	-3	-3	4	-3	-3	0	0	1	1	0	1.045	2.064	1.33	-0.384	1.652	0.52965	-2	-2	-3	-4	-3	-3	-4	3	-3	0	4	-3	-1	1	-3	-2	-3
2	0.52965	-2	-2	-3	-4	-3	-3	-4	3	-3	0	4	-3	-1	1	-3	-2	-3	-3	-1	0	0	0	1	1	0	1.266	-0.912	-1.505	-1.019	-0.987	0.53492	-1	3	1	-3	-2	-2	-3	2	-3	2	-1	1	-1	0	-4	0	-2
2	0.65329	-2	0	-2	3	-4	2	1	-2	-3	1	-3	1	-1	-4	-4	2	2	-4	0	-2	0	0	1	0	1	0.67	-2.647	-4.76	-0.228	1.399	0.66293	-1	1	2	-1	0	1	2	-1	4	-1	-1	-2	-1	0	-4	-1	0
2	0.78802	0	2	-1	-3	-4	0	-2	1	3	-1	-4	5	-1	-4	-3	-1	-1	-4	-3	0	1	0	0	0	1	0.44	2.897	1.502	1.538	-0.055	0.78888	-2	5	-1	-1	-4	3	0	-2	1	-4	-4	3	-3	-4	-3	-2	-1
2	0.75376	0	-1	3	2	-5	-1	2	-1	-4	-1	-2	-1	-1	-5	-1	2	-1	0	-4	-1	0	0	1	0	1	-0.169	0.933	1.299	0.945	0.828	0.75556	-1	1	0	0	2	0	1	-1	1	-1	0	0	1	-2	-1	0	1
2	0.31508	-1	-2	-2	-3	-3	3	-1	-2	-3	2	-1	1	4	-3	-3	-2	0	-4	-3	3	0	1	0	1	0	0.908	1.313	2.213	-0.032	0.326	0.27552	4	-3	-3	-3	-3	2	-1	-2	-3	0	-2	-2	-1	-4	1	0	1
2	0.086714	-2	-4	-2	-3	-5	-3	0	7	-4	-6	-6	-3	-5	-5	-4	-2	-4	-5	-5	-5	0	0	1	1	0	1.045	2.064	1.33	-0.384	1.652	0.087172	-4	-2	-1	-3	-5	1	-2	-4	9	-5	-4	-3	-3	1	-4	-3	-4
2	0.4543	-1	4	-1	-1	-3	-1	-1	-1	-1	1	-3	3	-3	-4	2	0	-1	-5	-4	-1	0	0	1	0	1	-0.277	1.648	0.533	1.831	-0.561	0.43143	-2	-1	1	-1	-2	-2	-2	0	4	-3	-4	-2	-3	3	-3	3	1
2	0.65505	-2	3	-1	-1	-5	4	4	-2	-3	-5	-4	4	-4	-5	-4	-2	-2	-5	-4	-4	0	0	1	0	1	0.113	-0.837	1.477	1.357	-1.453	0.65216	-2	-5	-5	-5	-3	-4	-5	-5	-5	5	2	-4	1	-3	-5	-4	-2
2	0.10059	-3	-4	-5	-5	-1	-4	-4	-5	-5	5	4	-4	0	-1	-3	-4	-3	-4	-2	2	0	0	1	1	0	0.393	0.816	2.131	-1.239	-0.547	0.096272	-1	-1	-3	-4	0	-2	-3	-3	-2	-3	-3	1	-3	-1	-3	-2	-3
2	0.24926	-3	1	-1	-3	-5	0	-2	2	-3	-3	-4	6	-4	-5	-4	-3	-2	-5	-4	0	1	0	0	1	0	0.44	2.897	1.502	1.538	-0.055	0.23021	-3	5	-2	1	-6	1	0	-1	-1	-5	-5	5	-4	-5	-4	-3	-3
2	0.1069	-3	-4	-4	-5	-4	-3	-4	-5	-4	0	-1	-4	10	-3	-5	-3	2	-4	-4	-1	1	0	0	1	0	-1.005	1.212	2.219	-0.663	-1.524	0.072284	-4	8	-3	-4	-6	-1	-2	-5	-3	-6	-5	0	-4	-5	-5	-3	-4
2	0.47277	-3	3	-2	-4	-5	4	-1	-5	3	-1	1	0	0	-1	-4	-3	-3	-2	5	-3	1	0	0	1	0	-0.503	-1.853	-3.005	0.931	-0.179	0.45878	3	-2	1	0	-4	1	1	1	1	-4	-4	0	-2	-5	-4	1	1
2	0.17616	-2	-4	-5	-4	-2	-4	-4	-5	-5	6	1	-4	0	-1	-4	-4	-2	-4	-3	2	0	1	0	1	0	0.393	0.816	2.131	-1.239	-0.547	0.17679	0	-1	0	-2	-3	0	-1	2	4	-4	-4	0	-3	-4	-2	4	-1
2	0.17492	-1	-4	-4	-4	-2	-3	-4	-3	-4	1	0	-3	1	-2	-4	-3	-1	-4	-2	6	0	1	0	1	0	1.242	-1.262	-0.544	-1.337	-0.279	0.14609	-3	-3	-4	-5	-2	-3	-4	-5	-4	1	5	-4	1	-1	-2	-4	-2
2	0.07214	-3	-3	-4	-5	-3	-3	-3	-3	-4	0	5	-3	4	0	-3	-3	-2	-3	-2	0	1	0	0	1	0	1.266	-0.912	-1.505	-1.019	-0.987	0.078538	-3	-3	1	7	-5	-1	2	-1	-2	-5	-5	-2	-4	-5	-3	-2	-2
2	0.034987	-1	-4	-2	-1	-4	-3	-3	7	-4	-5	-5	-3	-4	-5	-4	-2	-3	-4	-5	-5	0	0	1	1	0	1.045	2.064	1.33	-0.384	1.652	0.037917	-2	0	-1	-2	-4	8	0	-3	0	-4	-4	0	-2	-4	-3	-2	-2
2	0.10899	0	-3	-1	-2	1	-2	-2	-3	-3	-3	-3	-2	-2	-3	0	3	6	-4	-2	-2	1	0	0	1	0	0.908	1.313	2.213	-0.032	0.326	0.12045	-1	-3	-2	-3	0	-2	-2	-3	-3	-2	-2	-2	-2	-4	-3	1	7
2	0.10426	1	-4	-4	-4	10	-4	-4	-3	-4	-2	-2	-4	-2	-3	-4	-1	-2	-4	-4	1	1	0	0	1	0	-1.02	-0.255	-0.862	-1.343	0.465	0.10809	-4	-4	-4	-5	-4	-5	-5	-5	-3	-2	-1	-5	-1	8	-5	-4	-4
2	0.19206	-2	-4	3	-2	8	-4	-4	-1	-1	1	-2	-3	-4	-4	-5	-1	3	-1	-2	-1	0	0	1	1	0	-1.02	-0.255	-0.862	-1.343	0.465	0.14568	-3	-4	0	-4	-5	-3	-3	-4	-2	-3	-4	-4	-5	-1	7	-3	-3
2	0.69	1	-2	3	-1	-4	3	0	-2	-2	-4	-2	2	-3	-3	-1	1	0	-4	1	-3	0	0	1	0	1	-0.838	1.512	3.097	0.26	0.83	0.67011	1	-2	-2	-3	1	-3	-1	1	4	-2	0	-3	-2	-1	-3	2	3
2	0.57515	-4	2	-2	-3	-5	0	-2	-4	10	-5	-5	-1	-4	-3	-4	-3	-4	-4	-1	-5	0	0	1	1	0	-1.474	-0.078	-1.673	0.336	-0.417	0.65066	6	1	-3	-4	2	-1	-3	0	-3	-4	-4	-2	-3	-4	-3	-1	-2
2	0.044769	-2	-4	-2	-1	-4	-4	-4	6	-4	-4	0	-3	-3	-4	-4	-2	-3	-4	-5	-4	0	0	1	1	0	1.045	2.064	1.33	-0.384	1.652	0.047815	1	-4	-1	-3	-4	-3	-2	6	-3	-5	-5	-3	-4	-4	-4	-2	-3
2	0.026195	0	-4	-4	-5	-2	-4	-5	-1	-4	-2	-2	-4	1	-1	-5	-3	-2	11	0	-1	1	0	0	1	0	-2.128	-0.184	0.672	-0.595	0.009	0.036575	3	-3	-3	-4	2	-3	-2	-3	1	-3	1	-3	-1	-3	-4	0	5
2	0.056033	-2	1	2	0	-3	1	-1	-1	3	-3	-1	0	-2	0	3	0	-1	-2	3	-2	0	0	1	0	1	-1.474	-0.078	-1.673	0.336	-0.417	0.048832	-2	1	-1	0	-2	-1	2	-2	1	-2	-1	-1	-1	2	0	-2	-2
2	0.01981	-3	-7	-6	-7	11	-6	-7	-6	-6	-4	-4	-6	-4	-5	-4	-4	-4	-5	-5	-4	1	0	0	1	0	-1.02	-0.255	-0.862	-1.343	0.465	0.018951	-4	3	0	1	-5	-2	-2	-5	1	-1	-1	6	-4	-4	-3	-3	-2
2	0.73865	0	0	3	4	-3	-1	2	-1	-1	-2	-2	-2	-1	-1	0	-1	1	-2	-2	-2	1	0	0	0	1	-0.259	-3.242	-3.656	1.05	0.302	0.71922	-1	-1	2	-1	1	0	-2	4	0	-2	-2	-1	-2	0	-1	-1	-1
2	0.12489	-1	-4	-5	-5	-2	-3	-4	-2	-4	0	5	-4	2	-2	-3	-3	-2	-4	-4	3	1	0	0	1	0	1.266	-0.912	-1.505	-1.019	-0.987	0.085017	1	0	-4	-5	-1	-4	-4	2	-4	1	1	-3	2	1	-3	-1	-2
2	0.29077	-2	-1	0	2	-6	1	5	-4	0	-4	-5	0	-4	-6	-4	-1	2	-6	-5	-2	0	1	0	0	1	0.113	-0.837	1.477	1.357	-1.453	0.26953	-4	-1	-6	-6	-4	-5	-6	-6	-4	1	4	-5	1	3	-6	-5	-3
2	0.031386	6	-4	0	1	-4	-3	-3	-2	-3	-5	-4	-2	-4	-5	-4	1	-2	-6	-4	-4	1	0	0	1	0	-0.259	-3.242	-3.656	1.05	0.302	0.029739	3	-4	-4	-5	-1	-4	-4	-3	-3	-2	0	-4	1	-5	-4	0	5
2	0.85726	-1	7	-2	-3	-5	1	0	-2	-2	-4	-3	1	-3	-4	-3	-2	-2	-4	-3	-1	1	0	0	1	0	0.44	2.897	1.502	1.538	-0.055	0.84252	-2	1	-2	0	-4	0	3	0	-2	-4	-4	5	-3	-5	-3	0	-1
2	0.81929	-1	0	2	-1	-2	-1	-1	-2	-2	-2	-2	2	-1	-3	-2	1	5	-3	-2	-1	1	0	0	1	0	0.908	1.313	2.213	-0.032	0.326	0.76605	-1	-2	-1	-2	-2	-1	-2	-2	5	-2	-1	-2	-1	5	-3	2	-1
2	0.59745	2	3	-2	-1	-3	0	4	-1	-1	-4	-3	0	-3	-4	-2	-1	-2	-4	-3	-3	1	0	0	0	1	0.113	-0.837	1.477	1.357	-1.453	0.56639	-2	-3	-4	-5	-2	-3	-4	-5	0	1	4	-3	2	1	-4	-3	-2
2	0.66968	-1	1	-1	-1	-3	1	3	-2	-1	-3	-2	4	0	-3	-2	-1	0	-3	-2	-2	1	0	0	0	1	-0.277	1.648	0.533	1.831	-0.561	0.68466	-2	-2	-1	4	-3	-1	3	1	-2	-2	1	-1	-2	-2	-2	-1	-2
2	0.56483	-2	-4	-3	-3	-4	-3	-3	-1	-4	-4	-4	-3	-4	-5	8	-2	-2	-5	-4	-1	0	0	1	1	0	0.421	-1.392	-1.628	0.189	2.081	0.54385	-3	-3	-3	-4	-4	-3	-4	1	0	-3	-3	-3	-3	1	-4	-3	-3
2	0.44318	-1	-4	-4	-5	1	-4	-4	-5	-2	2	3	-4	1	3	-4	-3	-3	-3	2	4	0	0	1	1	0	1.242	-1.262	-0.544	-1.337	-0.279	0.46131	0	4	1	1	-1	0	0	-1	-2	-4	-4	4	-3	-2	-3	1	-2
2	0.015613	-2	-4	-2	-4	-3	-3	-4	-5	2	3	4	-3	-1	2	-5	-2	-3	-1	5	-1	1	0	0	1	0	1.266	-0.912	-1.505	-1.019	-0.987	0.016766	4	-2	-1	-3	-1	-1	-3	-3	4	-2	-2	0	1	-5	-4	1	-1
2	0.15348	-1	-1	2	0	-4	1	-1	-4	-1	-3	-2	2	3	-4	-4	4	1	-5	-1	-3	0	0	1	0	1	-0.277	1.648	0.533	1.831	-0.561	0.16572	-4	-3	1	-3	-5	1	3	0	8	-1	-4	-1	-4	-4	-2	-1	-3
2	0.051831	2	1	-1	-2	-2	2	2	-3	-2	-2	0	3	-1	-1	-4	-2	-3	4	1	-3	0	0	1	1	0	1.57	-0.146	-0.733	-0.591	-1.302	0.03218	-3	-4	0	-4	0	-4	-4	-4	-2	-3	-2	-4	-3	-1	-3	-1	7
2	0.13734	-3	-4	-4	-5	2	-5	-4	-5	-2	5	0	-3	-1	1	-5	-4	-3	-2	5	2	1	0	0	1	0	0.393	0.816	2.131	-1.239	-0.547	0.14425	6	-4	-4	-5	4	-4	-3	-3	-4	-4	-2	-4	-4	-5	-4	0	-2
2	0.21617	0	-1	-2	0	-2	0	2	-2	1	-1	0	3	-1	0	2	-1	-1	-3	-2	-2	0	0	1	1	0	1.57	-0.146	-0.733	-0.591	-1.302	0.26295	-1	-1	0	0	-3	-1	1	-1	-1	0	-1	4	1	2	-2	-1	-1
2	0.47424	-1	1	2	0	-5	1	-1	1	4	0	-2	0	0	-1	-1	0	1	-5	0	-1	0	0	1	0	1	-0.503	-1.853	-3.005	0.931	-0.179	0.46059	1	-2	-1	-2	3	-2	-1	3	1	-1	-1	0	1	-1	-4	-1	0
2	0.3893	-2	-2	0	6	-4	-1	3	-2	-2	-3	-3	-1	-3	-3	1	-1	-2	-4	-3	-3	0	1	0	1	0	-0.259	-3.242	-3.656	1.05	0.302	0.37061	3	-2	-1	-2	3	-1	-2	3	1	-2	-2	-2	-2	-2	-2	2	0
2	0.19267	-1	-2	3	-2	7	1	-2	-2	-2	-2	-1	-2	3	-2	-2	1	-1	-2	-2	-2	0	0	1	1	0	-0.169	0.933	1.299	0.945	0.828	0.16254	0	-2	0	-2	8	-2	-2	0	0	-2	-2	-2	-2	-3	-2	2	0
2	0.30844	0	2	1	3	-4	3	3	-3	0	-1	-3	1	-3	-4	-3	0	-3	-4	-2	-4	1	0	0	0	1	0.113	-0.837	1.477	1.357	-1.453	0.34009	-2	1	3	-1	-4	0	2	-2	1	-4	-2	0	-3	-4	-3	4	1
2	0.1373	-3	-1	1	5	-5	3	3	-3	2	-5	-5	0	-4	-5	0	0	-3	-6	-4	-5	1	0	0	0	1	-0.259	-3.242	-3.656	1.05	0.302	0.12312	-1	3	-2	1	-5	2	3	-3	-3	-3	-3	3	-3	-5	-4	0	-1
2	0.025051	-4	-2	-5	-5	0	-1	-4	-5	-2	-2	2	-4	-2	8	-4	-3	-2	-2	1	-3	0	1	0	1	0	-0.397	0.412	1.891	-1.006	-0.59	0.027203	-3	1	6	0	-2	1	1	2	1	-5	-2	0	-4	-4	-4	0	-3
2	0.24226	-1	1	-2	0	-3	1	4	-3	1	-3	-3	0	-2	-2	-3	1	1	-1	-2	-1	0	1	0	0	1	0.113	-0.837	1.477	1.357	-1.453	0.15917	-1	0	-2	-2	0	0	3	-3	-2	-1	-2	-1	-1	-2	-3	1	4
2	0.011675	-2	-5	-3	-4	-5	-4	-5	7	-5	-7	-6	-4	-5	-6	-5	-3	-4	-5	-6	-6	0	0	1	1	0	1.045	2.064	1.33	-0.384	1.652	0.010052	2	-5	-5	-5	0	-1	-4	-4	-5	2	-1	-4	0	1	6	-2	-1
2	0.42082	2	-1	-1	1	0	1	2	-2	1	-1	-2	1	-1	-3	-2	0	1	-5	-4	1	0	1	0	0	1	0.113	-0.837	1.477	1.357	-1.453	0.38716	-3	-2	2	7	-1	-3	-1	1	-1	-5	-4	-4	-5	-5	-4	0	0
2	0.077621	-4	-3	-4	-3	-1	-4	-3	-5	0	0	-2	-3	-3	5	-5	-2	-4	-1	8	-1	0	1	0	1	0	-0.838	1.512	3.097	0.26	0.83	0.073577	-3	-2	-4	-4	0	-4	-4	-5	6	-4	-4	-4	-4	3	-5	-1	-4
2	0.69903	0	0	1	0	1	1	1	0	1	-4	-1	1	-4	0	0	0	0	-5	1	0	1	0	0	0	1	-0.503	-1.853	-3.005	0.931	-0.179	0.66304	-1	0	1	0	3	0	0	-2	1	1	1	-1	1	0	0	-1	-1
2	0.066464	-3	-2	-2	-2	-5	-2	0	-4	-4	-5	-4	1	-3	-5	8	-2	-3	-5	-3	-4	0	0	1	1	0	0.421	-1.392	-1.628	0.189	2.081	0.048485	-3	-5	-5	-5	11	-5	-5	-5	-5	-4	-3	-5	-4	-4	-5	-3	-3
2	0.062661	-3	-3	-4	-5	11	-5	-5	-4	-5	-3	-3	-5	-4	-4	-4	-3	-3	-4	-4	-3	0	1	0	1	0	-1.02	-0.255	-0.862	-1.343	0.465	0.07233	0	0	-1	-2	-2	2	1	-1	-2	-1	-2	2	0	-2	-3	1	1
2	0.052135	-2	-2	2	-2	-5	-2	-2	6	0	-6	-5	-2	-5	-3	1	-1	-4	-5	-3	-6	0	0	1	0	1	1.045	2.064	1.33	-0.384	1.652	0.04625	-2	0	1	-1	2	-1	1	-3	0	0	-2	0	-2	0	2	-1	1
2	0.002403	-1	-5	-5	-6	-5	-5	-5	-1	0	0	-2	-5	-2	1	-6	-4	-3	5	9	-1	1	0	0	1	0	-0.838	1.512	3.097	0.26	0.83	0.002106	-3	-4	6	-3	-3	-1	-2	-4	-2	-2	-3	-3	-4	-3	-3	2	3
2	0.10583	1	-2	-3	-4	-5	-1	2	-4	-3	-2	-1	-3	0	2	4	1	2	-5	0	-3	0	0	1	0	1	0.421	-1.392	-1.628	0.189	2.081	0.095622	-3	0	-2	-2	-2	4	4	-5	-1	0	-1	-2	-3	-3	-4	0	1
2	0.16529	3	2	0	0	-1	1	0	-2	-2	-3	-3	2	0	-5	0	0	0	0	-4	-3	1	0	0	0	1	0.44	2.897	1.502	1.538	-0.055	0.13635	0	0	1	1	2	2	2	0	0	-3	-3	0	-1	-5	-1	1	1
2	0.31748	4	0	-3	-4	-3	-1	-2	0	-2	-1	-1	0	1	-4	-4	0	-1	-5	-4	1	1	0	0	1	0	1.57	-0.146	-0.733	-0.591	-1.302	0.30794	1	0	-1	0	-4	0	2	1	1	-2	-3	4	-3	-3	-4	0	0
2	0.095688	0	-1	0	3	-3	1	1	0	-2	0	-2	1	1	-2	1	-2	-1	-4	-4	-1	0	0	1	0	1	0.393	0.816	2.131	-1.239	-0.547	0.090253	-1	-1	1	4	-4	1	3	-3	0	2	-3	0	-3	-4	-1	-1	-2
2	0.12093	-3	-5	-5	-4	-6	-4	-4	-3	-5	-5	-5	-4	-5	-6	9	-3	-3	-6	-6	-5	0	0	1	1	0	0.421	-1.392	-1.628	0.189	2.081	0.097092	5	-4	-4	-5	-1	-4	-4	-3	-5	1	1	-4	2	-3	-4	-1	0
2	0.63224	2	-4	-4	-4	4	-3	-4	-1	-4	-1	0	0	2	3	-4	1	-2	-3	1	2	1	0	0	1	0	-0.397	0.412	1.891	-1.006	-0.59	0.64056	0	3	-1	-3	-4	3	-1	-4	-1	-3	-2	4	3	-4	-4	0	-3
2	0.8458	0	-3	-1	-2	7	0	-4	1	-4	1	-1	-3	0	-1	1	0	-2	-4	-1	0	0	0	1	1	0	-1.02	-0.255	-0.862	-1.343	0.465	0.86109	-1	-1	-1	0	8	-1	2	-1	-4	0	-1	-1	-1	-4	-4	-1	0
2	0.2836	-1	-1	0	2	-2	-2	2	1	-1	-1	-3	0	-2	-3	-1	1	2	-5	-2	-1	0	0	1	0	1	1.045	2.064	1.33	-0.384	1.652	0.29705	0	-2	3	3	-2	1	2	-1	-1	-4	-2	-2	-2	-5	2	2	0
2	0.098795	0	-4	3	-4	-4	-4	-4	-2	-4	0	4	-4	-1	-3	-4	0	-3	-4	-4	0	1	0	0	1	0	1.266	-0.912	-1.505	-1.019	-0.987	0.097986	-1	-1	-1	3	-4	0	3	-4	-1	-4	-4	-2	-4	-1	-2	1	3
2	0.13257	-2	2	1	-2	-3	4	0	0	5	-4	-4	3	-3	-3	-4	-1	-2	-4	-1	-2	0	0	1	0	1	-0.277	1.648	0.533	1.831	-0.561	0.1277	2	0	-4	-3	0	-3	-4	-4	-2	1	4	-2	0	-2	-3	-3	1
2	0.22168	0	-5	-3	-1	-5	-4	-3	7	-4	-6	-6	-4	-5	-6	-4	1	-3	-5	-5	-5	0	0	1	1	0	1.045	2.064	1.33	-0.384	1.652	0.25213	-1	-4	-3	-4	-1	-3	-4	-4	-4	-1	-2	-3	-3	-4	-1	-1	7
2	0.24969	-2	-2	-3	-4	-4	-3	-3	-5	-4	1	4	-1	-1	4	-5	-1	-3	-3	3	1	0	0	1	1	0	1.266	-0.912	-1.505	-1.019	-0.987	0.2056	-1	-4	-3	-4	-2	-3	-4	6	-4	-3	-2	-3	6	-4	-1	-1	-3
2	0.14412	0	1	-3	-3	-1	-2	-3	5	0	-3	-2	-3	0	0	-3	2	-2	-4	0	-3	0	0	1	1	0	1.045	2.064	1.33	-0.384	1.652	0.13313	-3	-2	-1	-3	-5	8	0	-5	-1	-2	-4	-1	-3	-6	-2	-3	-2
2	0.035949	-1	1	-2	-3	2	-1	-1	-3	0	-1	0	-1	0	4	-3	-2	-2	5	4	-2	0	1	0	1	0	-0.397	0.412	1.891	-1.006	-0.59	0.029539	4	-3	-1	-3	1	0	-2	-1	-3	-3	-3	-2	-3	-4	3	2	2
2	0.053468	-3	-5	-2	-2	3	-3	-4	-5	-4	4	2	-4	-1	2	-3	-2	0	4	0	2	0	0	1	1	0	0.393	0.816	2.131	-1.239	-0.547	0.038613	-1	-1	-2	2	-5	-2	1	1	-3	-5	-5	-1	-5	-5	6	0	-2
2	0.52523	1	1	-1	-3	-2	3	1	-2	-2	1	-1	2	1	-4	-1	1	0	-5	-3	-1	0	0	1	0	1	0.113	-0.837	1.477	1.357	-1.453	0.52596	-1	-2	2	3	-2	-3	0	2	0	-5	-3	1	-5	-3	3	0	0
2	0.42515	-2	-3	-1	4	-5	0	4	-2	-3	-5	-2	-1	-4	-5	1	0	-1	4	-4	-3	1	0	0	0	1	0.113	-0.837	1.477	1.357	-1.453	0.45794	1	-3	-2	-2	1	0	0	-2	-1	-1	2	-3	3	1	-3	1	0
2	0	0	0	0	0	0	0	0	0	0	0	0	0	0	0	0	0	0	0	0	0	0	0	0	0	0	0	0	0	0	0	0	0	0	0	0	0	0	0	0	0	0	0	0	0	0	0	0	0
2	0.96347	-1	-2	-2	-2	-3	-2	1	0	-2	-3	-1	-2	-2	-2	3	4	-1	6	-2	-3	1	0	0	1	0	0.67	-2.647	-4.76	-0.228	1.399	0.96043	-2	-1	-3	-3	4	-2	-2	-3	-3	-1	2	0	-1	-1	-3	-1	1
2	0.96043	-2	-1	-3	-3	4	-2	-2	-3	-3	-1	2	0	-1	-1	-3	-1	1	7	-1	0	1	0	0	1	0	1.266	-0.912	-1.505	-1.019	-0.987	0.95664	1	0	-2	-2	-2	-2	-2	1	-2	-2	-2	-2	-2	3	3	2	-1
2	0.80521	0	-3	-2	-2	-2	-2	0	-3	-3	1	-2	-2	-2	-3	4	2	3	-4	-3	1	0	0	1	0	1	0.421	-1.392	-1.628	0.189	2.081	0.77843	-2	2	-1	2	-4	0	5	-3	-1	-4	-3	-1	-3	-3	-2	-2	-2
2	0.7992	-3	-1	7	0	-4	-1	-1	-2	-1	-4	-4	1	-3	-4	-3	-1	-1	-4	-3	-4	0	0	1	1	0	-0.169	0.933	1.299	0.945	0.828	0.8064	-1	-2	1	0	-3	-1	-1	-2	-2	-3	-3	2	-3	-4	5	3	2
2	0.92863	-3	2	-2	1	-4	5	2	-2	-2	-2	-1	2	-3	-4	-1	-1	0	-4	-3	-3	1	0	0	0	1	-0.503	-1.853	-3.005	0.931	-0.179	0.92978	2	0	-2	-1	-3	1	3	-2	-3	-3	-2	-2	0	-4	1	3	-2
2	0.86612	-1	0	1	1	-1	-1	2	0	-1	-4	-4	-2	-1	-4	2	4	-2	4	-3	-3	0	0	1	0	1	0.67	-2.647	-4.76	-0.228	1.399	0.84542	-1	0	2	-1	-1	0	0	0	2	-1	-1	-1	-1	0	-1	3	-2
2	0.79644	-2	1	0	1	-3	0	0	0	0	-3	-3	1	-3	-1	5	1	-2	-3	-1	-3	0	0	1	0	1	0.421	-1.392	-1.628	0.189	2.081	0.75683	-1	-2	-2	0	-3	3	2	0	-2	-1	2	-1	0	-1	0	-1	-1
2	0.16608	-2	4	1	-1	-4	0	-1	-2	-3	-3	-4	2	-2	-5	5	-1	0	-5	-4	-4	0	0	1	0	1	-0.277	1.648	0.533	1.831	-0.561	0.14343	-2	-4	-1	-3	9	-3	-3	-3	-4	-1	-3	-3	0	-4	-3	-1	4
2	0.081891	5	-3	-3	-4	-3	-3	-3	2	-3	-3	-1	-3	-3	-4	-3	0	-2	-4	0	-1	1	0	0	1	0	1.57	-0.146	-0.733	-0.591	-1.302	0.095602	-3	4	0	-2	-1	2	0	-4	-1	-1	0	4	0	-4	-4	0	-1
2	0.15948	-3	-4	-5	-6	-3	-1	-5	-6	-5	3	5	-4	2	-2	-5	-4	-2	-4	-3	1	1	0	0	1	0	1.266	-0.912	-1.505	-1.019	-0.987	0.17371	-3	3	-1	-3	-4	0	0	-4	2	-4	-2	5	-3	-4	-4	-2	-1
2	0.11085	-2	1	0	-2	0	-1	-1	-1	1	-2	-1	-2	-4	-5	6	-1	-1	-5	-3	0	0	0	1	1	0	0.421	-1.392	-1.628	0.189	2.081	0.084583	0	-1	-3	-3	2	-2	-3	-3	-1	-2	2	-3	1	-2	5	-1	-1
2	0.093987	-1	-2	0	2	-1	0	0	5	0	-5	-2	-2	-4	0	-2	-1	-2	-5	-4	-1	0	0	1	0	1	0.113	-0.837	1.477	1.357	-1.453	0.08745	-1	-4	-5	-5	-4	-4	-5	-1	-4	3	3	-1	2	1	-5	-1	0
2	0.14719	0	-3	3	-1	0	-1	-1	-1	6	-4	-3	-2	-3	-2	4	0	-1	-4	-3	-4	0	0	1	1	0	0.421	-1.392	-1.628	0.189	2.081	0.18767	0	-3	-3	-1	6	-1	-3	0	-3	-1	-1	-2	0	3	-2	1	-1
2	0.83091	1	1	0	0	-4	1	-1	-1	1	1	-2	-1	-4	0	1	3	0	-5	0	-4	0	0	1	1	0	0.67	-2.647	-4.76	-0.228	1.399	0.84818	-2	0	0	5	-5	0	2	-2	5	-5	-3	-1	-4	-1	0	1	-1
2	0.42351	-1	-3	-1	0	2	-1	-1	-4	0	2	2	-3	0	-3	3	-1	-1	-1	-2	2	0	0	1	0	1	1.266	-0.912	-1.505	-1.019	-0.987	0.41389	-1	-2	1	0	-2	-1	1	-2	0	-2	-2	-2	-2	-3	6	-2	0
2	0.037508	-1	0	0	3	-2	0	1	-2	1	-1	-1	-2	-1	3	1	-1	-1	-4	1	-1	0	0	1	0	1	-0.838	1.512	3.097	0.26	0.83	0.038066	0	3	1	2	-1	2	-1	2	1	-4	-3	-1	-1	-2	-1	-1	-1
2	0.16703	0	-2	-1	-3	-1	3	2	-4	-1	-1	-3	-2	-1	0	-4	0	2	5	2	1	1	0	0	1	0	0.113	-0.837	1.477	1.357	-1.453	0.13938	0	-1	-1	-2	4	-2	-2	1	-1	-2	0	-1	0	-1	-3	4	-1
2	0.24732	-2	-1	0	4	-3	-1	0	-3	-2	-2	1	0	-3	-1	4	0	-1	0	-3	-2	0	0	1	0	1	0.421	-1.392	-1.628	0.189	2.081	0.25368	-3	-3	-3	0	0	-2	-2	-3	-2	4	3	-3	-2	1	0	-3	-1
2	0.1286	-1	-1	-3	-4	2	-3	-3	-4	-2	1	1	1	1	3	-3	-1	0	2	-2	3	0	0	1	1	0	-0.397	0.412	1.891	-1.006	-0.59	0.11659	-1	-1	0	4	-5	2	5	-2	-2	-3	-5	1	-4	-5	-2	0	-2
2	0.22813	-2	-1	2	1	-2	1	4	-2	0	1	-1	1	-2	-2	-2	-1	-2	-1	-2	-2	1	0	0	1	0	-0.503	-1.853	-3.005	0.931	-0.179	0.19208	3	1	-1	-2	0	-1	-2	2	0	-2	-2	3	0	-2	-1	0	-2
2	0.5225	-3	-4	-4	-2	-1	-3	-2	-5	-2	-1	-4	-3	-3	-3	8	0	-2	0	-5	-2	0	0	1	0	1	0.421	-1.392	-1.628	0.189	2.081	0.47454	-3	-3	0	4	-5	-1	1	5	2	-5	-5	-2	-2	-3	-1	-1	-2
2	0.19263	-1	-2	-1	-5	6	-2	-3	0	3	-1	0	-3	3	1	0	1	-2	-2	2	-2	1	0	0	1	0	1.045	2.064	1.33	-0.384	1.652	0.17895	-2	-3	-3	0	-5	-1	-1	-1	-3	1	5	-4	0	1	-5	-3	-1
2	0.48446	-3	3	-2	-3	-5	5	-1	-4	-2	-4	-3	5	-3	-4	-3	-1	-3	-4	0	-4	0	0	1	0	1	0.44	2.897	1.502	1.538	-0.055	0.4279	2	4	-1	-3	0	-2	-3	-1	-3	-3	-4	-2	-3	-4	2	2	1
2	0.065197	-1	-3	-1	-3	-5	1	-4	7	0	-6	-6	-4	-5	-6	-5	0	-4	-6	-6	-5	0	0	1	1	0	-0.169	0.933	1.299	0.945	0.828	0.071173	-3	3	2	1	0	1	2	-4	3	-4	-4	3	-4	-5	-5	1	-2
2	0.76629	-1	0	0	0	-2	1	2	-1	-1	0	-1	-1	-2	-2	2	-1	1	-3	-1	0	0	0	1	0	1	0.421	-1.392	-1.628	0.189	2.081	0.80186	0	-3	-1	-1	-3	-2	-1	5	-2	-2	-2	-2	-2	-3	-1	-1	-2
2	0.80186	0	-3	-1	-1	-3	-2	-1	5	-2	-2	-2	-2	-2	-3	-1	-1	-2	0	-1	-1	0	0	1	0	1	1.045	2.064	1.33	-0.384	1.652	0.79908	-1	-1	5	0	-1	1	0	-1	2	-1	-2	0	-1	-3	-1	1	0
2	0.38943	0	-2	0	0	-4	-3	-3	0	0	2	-3	-1	-3	-2	2	2	2	-5	-1	-2	0	0	1	0	1	0.421	-1.392	-1.628	0.189	2.081	0.34957	-3	-4	5	6	-6	1	0	-2	-3	-4	-6	-2	-5	-6	-4	-1	-1
2	0.46073	-1	-3	4	-2	0	-2	0	-3	-3	-1	1	1	3	2	0	-1	-2	-4	-3	-2	1	0	0	1	0	1.266	-0.912	-1.505	-1.019	-0.987	0.4458	0	-2	-4	-2	-1	-3	0	-3	-4	2	3	-3	2	1	-4	-1	-1
2	0.29738	0	-4	-1	-4	-2	-3	-3	4	-4	-5	-3	-3	-5	-6	6	-1	-2	-6	-5	-4	0	0	1	0	1	0.421	-1.392	-1.628	0.189	2.081	0.26574	0	0	-2	0	-2	2	5	-1	0	-3	-2	-1	-1	-5	-3	-1	1
2	0.047734	1	-5	-4	0	-5	-4	-4	-3	-4	-4	-3	-4	-3	3	7	-3	-3	-4	1	-4	0	0	1	1	0	0.421	-1.392	-1.628	0.189	2.081	0.046187	-4	-3	1	-3	-6	-1	-3	-4	10	-6	-5	-3	-4	-4	-4	-2	-4
2	0.021444	-4	-4	-6	-6	2	-5	-5	-6	-1	0	5	-5	0	1	-6	-5	-4	8	0	-1	0	1	0	1	0	1.266	-0.912	-1.505	-1.019	-0.987	0.022924	-2	-5	-4	-6	-1	-5	-5	-3	-4	1	2	-5	-1	3	-5	-3	0
2	0.17105	1	2	-2	0	-4	-1	0	-4	-3	0	-1	0	-2	-4	0	0	3	-5	-2	3	1	0	0	1	0	0.908	1.313	2.213	-0.032	0.326	0.18095	0	0	-1	2	-3	0	4	0	-3	-4	-3	2	-4	-6	-2	0	0
2	0.25989	1	-2	-1	-2	0	-1	-2	-1	-2	0	1	-2	2	1	-2	1	0	-2	1	2	0	1	0	1	0	-0.397	0.412	1.891	-1.006	-0.59	0.22472	-1	0	-1	1	-2	0	4	-2	-1	-2	-2	-1	-1	0	2	1	-1
2	0.94906	-2	4	1	2	-4	2	2	-1	3	-4	-4	0	-3	-2	-1	-1	1	-4	-2	-3	1	0	0	0	1	0.44	2.897	1.502	1.538	-0.055	0.9474	0	-2	0	2	-4	4	-1	3	4	-4	-4	0	-3	-4	-2	0	-2
2	0.29521	-2	-4	-1	-3	-5	-4	-3	7	-1	-6	-6	-3	-5	-5	-4	-2	-4	-5	-5	-5	0	0	1	0	1	1.045	2.064	1.33	-0.384	1.652	0.29039	-1	-2	-1	6	-5	4	1	-3	-1	-5	-4	-1	-4	-4	-3	0	-1
2	0.030345	-2	-4	-2	-3	-5	-4	-4	7	-4	-6	-6	-3	-5	-5	-4	-2	-4	-5	-5	-5	0	0	1	1	0	1.045	2.064	1.33	-0.384	1.652	0.030403	-1	-2	8	0	-5	-2	-1	-2	1	-5	-5	-1	-4	-5	-4	-1	-1
2	0.21796	0	0	-1	0	-4	3	5	-2	-2	-4	-4	3	-3	-4	-3	-1	-2	-4	-3	-4	1	0	0	0	1	0.113	-0.837	1.477	1.357	-1.453	0.21197	-3	-4	-4	-5	-2	-4	-4	-5	-4	4	5	-4	2	-2	-4	-3	-3
2	0.159	4	-3	-1	2	-3	-2	-2	-2	-3	-4	-4	-2	-3	-5	0	4	1	-5	-4	-3	1	0	0	1	0	0.67	-2.647	-4.76	-0.228	1.399	0.16586	-1	-4	-2	-3	-5	-4	-4	7	-4	-6	-6	-3	-5	-5	-4	0	-3
2	0.5489	0	-3	-1	-2	-3	-2	-2	2	-3	-5	-5	-2	-4	-5	-3	6	-1	-5	-4	-4	0	0	1	1	0	0.67	-2.647	-4.76	-0.228	1.399	0.51356	-3	-1	-1	-2	-5	8	0	-4	-1	-5	-4	-1	-2	-5	-3	-2	-3
2	0.26239	-1	-1	2	-2	-5	-1	-1	1	2	-4	-1	-1	0	4	-5	1	2	-4	1	-2	0	0	1	1	0	0.908	1.313	2.213	-0.032	0.326	0.23466	-2	-4	0	7	0	2	-1	-3	-1	-3	-4	-2	-5	-6	-4	1	-2
2	0.21605	-2	3	-1	0	0	1	0	-2	2	-2	-3	4	0	-5	-5	1	-1	-2	-1	-2	1	0	0	1	0	-0.277	1.648	0.533	1.831	-0.561	0.27759	3	1	-1	-2	0	-1	-3	0	-1	-4	0	-1	-1	-1	-5	1	-1
2	0.6563	-2	-1	-1	5	0	0	1	0	0	-3	-3	-2	2	-3	-2	1	0	-4	-3	0	0	0	1	0	1	-0.259	-3.242	-3.656	1.05	0.302	0.63342	0	-1	-2	4	1	-1	3	0	-2	-3	-2	0	-3	-3	2	0	-1
2	0.2694	0	1	1	1	3	1	-3	-4	-4	1	0	1	3	-4	-4	0	1	-5	-4	0	0	1	0	1	0	0.908	1.313	2.213	-0.032	0.326	0.31161	-1	0	1	-4	-5	1	0	-1	2	0	-1	0	2	1	-5	0	0
2	0.15582	6	-4	-4	-5	-3	-4	-4	-3	-4	-2	-1	-4	-3	-5	-4	0	-2	-5	-4	-1	1	0	0	1	0	1.57	-0.146	-0.733	-0.591	-1.302	0.14529	-2	-5	-6	-6	-4	-5	-5	-6	-5	3	5	-5	2	2	-5	-5	-3
2	0.62524	-4	-2	-3	-1	-6	-1	7	-5	-3	-6	-5	-2	-5	-6	-1	-3	-4	-5	-5	-5	1	0	0	1	0	0.113	-0.837	1.477	1.357	-1.453	0.6683	2	-2	0	5	-2	-1	-2	-1	-1	-3	-5	1	-4	-5	-2	1	0
2	0.070706	-1	-4	-4	-3	-5	-3	-3	-4	0	-5	-5	-3	-4	-6	8	-1	-3	-6	-5	-4	0	0	1	1	0	0.421	-1.392	-1.628	0.189	2.081	0.075702	-1	-3	-2	-3	0	0	-3	0	-4	-1	-2	-3	2	-4	-3	2	6
2	0.089192	-2	0	2	-1	-4	5	0	-2	5	-3	-3	-1	-1	-1	-3	0	2	-4	-3	-3	0	1	0	1	0	-1.474	-0.078	-1.673	0.336	-0.417	0.10443	-2	-4	-5	-5	-3	-4	-5	-5	-5	5	2	-4	3	1	-5	-4	-2
2	0.038461	2	-5	-5	-5	5	-2	-5	-5	-5	3	2	-5	2	-1	-5	0	-1	-5	-4	3	1	0	0	1	0	1.266	-0.912	-1.505	-1.019	-0.987	0.034084	-3	-5	-6	-6	-2	-5	-6	-4	-6	4	5	-5	1	0	-6	-4	-2
2	0.39541	2	-3	-2	1	-2	-2	0	-3	-3	1	0	-2	-1	-3	-3	0	3	-4	-3	1	0	0	1	0	1	1.242	-1.262	-0.544	-1.337	-0.279	0.37903	0	-3	2	-2	-3	-3	-3	6	-3	-4	-5	-2	-4	-4	-3	-1	0
2	0.27895	-1	0	-1	-4	0	0	-3	-2	-2	0	1	0	1	0	0	0	2	-1	-1	2	0	0	1	0	1	1.266	-0.912	-1.505	-1.019	-0.987	0.26377	0	-3	-1	0	-1	-3	-1	1	-1	-5	-4	-1	-4	-5	4	3	2
2	0.84661	0	0	0	3	-2	1	2	0	-1	-3	-2	0	-1	-3	1	0	-1	-1	-2	-1	0	0	1	0	1	-0.259	-3.242	-3.656	1.05	0.302	0.82664	-1	-1	-1	2	-1	0	2	-2	-1	0	0	-1	0	-1	0	-1	0
2	0.80306	-1	0	0	0	-5	1	0	-1	2	0	-1	0	2	1	0	-1	0	4	1	-1	1	0	0	0	1	0.113	-0.837	1.477	1.357	-1.453	0.80937	-1	0	0	2	-5	1	1	0	1	-1	-1	0	1	0	-1	0	0
2	0.0855	-2	-3	-3	-3	-2	-3	-3	-3	-3	6	0	-3	0	-1	-3	-3	-2	-3	-2	3	0	1	0	1	0	0.393	0.816	2.131	-1.239	-0.547	0.070103	-2	-2	1	4	-3	-1	1	-2	-2	-3	-3	-1	-3	-3	5	-1	-2
2	0.35583	-4	8	-3	-4	-6	0	-2	-5	0	-5	-5	1	-4	-5	-4	-3	-4	-5	-4	-5	0	0	1	1	0	0.44	2.897	1.502	1.538	-0.055	0.32317	-1	-3	-3	-4	3	-2	0	-5	-2	0	-1	-3	-1	-4	-4	-2	3
2	0.088361	-1	-5	-5	-5	-3	-3	-4	-5	-4	-1	-1	-4	-3	-5	7	-3	-2	-6	-3	2	1	0	0	1	0	0.421	-1.392	-1.628	0.189	2.081	0.077031	-3	5	-1	-4	-2	2	-2	-4	3	-2	-2	1	3	-2	1	-1	0
2	0.23773	1	-1	2	-1	0	1	2	1	-1	-3	-3	1	-3	-2	1	2	0	-2	0	-3	0	0	1	1	0	1.57	-0.146	-0.733	-0.591	-1.302	0.30326	-1	-1	0	1	-2	0	2	-1	1	0	0	0	0	2	-2	1	1
2	0.75288	0	0	2	0	-2	2	0	0	1	-1	-1	-1	-1	-1	-1	1	1	-2	-1	0	0	0	1	0	1	1.57	-0.146	-0.733	-0.591	-1.302	0.74892	1	-1	1	-2	-2	0	0	1	0	0	-1	-1	-1	-1	0	1	1
2	0.028633	3	-5	-4	-5	1	-4	-4	3	-5	0	-1	-4	-1	0	-5	1	2	-4	-4	1	1	0	0	1	0	0.908	1.313	2.213	-0.032	0.326	0.026647	3	-5	-4	-5	0	-4	-5	3	-5	2	1	-5	3	-1	-5	-1	-1
2	0.076925	-2	-5	-3	-4	-5	-5	-5	7	-5	-7	-7	-4	-6	-6	-5	-2	-4	-5	-6	-6	1	0	0	1	0	1.045	2.064	1.33	-0.384	1.652	0.075357	-3	8	0	-4	-6	1	-3	-4	-2	-4	-4	-1	-3	-6	-5	-1	-3
2	0.004397	2	-5	-5	-6	-1	-5	-5	-2	-5	2	4	-5	1	1	-5	-3	-1	-5	-4	1	1	0	0	1	0	1.266	-0.912	-1.505	-1.019	-0.987	0.004537	0	-5	-6	-6	-4	-5	-6	-3	-6	5	2	-5	-1	2	-3	-4	-3
2	0.009939	-3	-5	-5	-6	-3	-5	-6	-6	-5	1	5	-5	1	5	-6	-5	-4	-4	-2	-1	1	0	0	1	0	1.266	-0.912	-1.505	-1.019	-0.987	0.009988	4	-4	-2	-2	2	-3	-1	3	-4	-2	-4	-4	-4	-5	-3	2	0
2	0.46834	-3	2	4	0	-4	0	-2	-2	3	-3	-4	1	-3	-2	-3	1	0	0	4	-3	0	1	0	0	1	0.44	2.897	1.502	1.538	-0.055	0.42583	-1	1	-3	-3	-3	-1	-2	-4	-3	0	0	-1	-2	-4	1	1	5
2	0.1289	-4	-5	-6	-6	-2	-2	-6	-6	-6	6	3	-5	-1	-3	-6	-5	-3	-5	-4	2	1	0	0	1	0	1.266	-0.912	-1.505	-1.019	-0.987	0.11349	-4	1	-3	-4	-6	-2	-2	-5	-4	-6	-5	8	-4	-6	-4	-3	-4
2	0	0	0	0	0	0	0	0	0	0	0	0	0	0	0	0	0	0	0	0	0	0	0	0	0	0	0	0	0	0	0	0	0	0	0	0	0	0	0	0	0	0	0	0	0	0	0	0	0
2	0.017258	-1	-2	-3	-4	-2	0	-3	-4	-1	2	3	0	0	2	-5	-1	-2	-4	-3	2	1	0	0	1	0	1.266	-0.912	-1.505	-1.019	-0.987	0.014084	0	-3	-1	-4	5	-3	-3	-3	-1	-2	2	-3	-3	-1	-3	2	4
2	0.027499	-2	2	-3	-3	0	4	3	-4	-1	0	-2	2	1	-1	-4	-2	-2	-5	-4	1	0	1	0	1	0	0.113	-0.837	1.477	1.357	-1.453	0.026173	-3	7	-2	-2	-6	0	-1	-4	-1	-5	-5	5	-4	-5	-4	-3	-3
2	0.26968	1	1	1	1	-5	1	3	0	0	-4	-4	0	-3	1	-4	0	-1	0	1	-2	1	0	0	0	1	-0.169	0.933	1.299	0.945	0.828	0.29782	1	-2	-5	-5	-1	-4	-5	-1	-5	4	2	-4	0	1	-1	-3	1
2	0.38973	2	2	-2	-4	-5	3	0	0	-2	-1	-3	3	0	-4	-4	-1	-1	-5	-1	1	0	0	1	0	1	1.57	-0.146	-0.733	-0.591	-1.302	0.49386	-2	-1	1	4	-3	1	-1	-1	2	-2	-5	1	-2	-1	1	1	1
2	0.35082	4	-3	1	-1	0	0	1	1	-3	0	-3	-2	-3	0	-3	0	-2	-4	-3	-1	0	0	1	1	0	1.57	-0.146	-0.733	-0.591	-1.302	0.4106	3	-3	0	0	-4	1	4	-1	1	-3	-4	-2	-3	-3	-3	0	-2
2	0.98129	-3	-3	0	7	-5	-2	0	-3	-2	-5	-5	-2	-4	-5	-3	-1	-2	-6	-4	-5	0	0	1	1	0	-0.259	-3.242	-3.656	1.05	0.302	0.98105	-2	-3	-3	-3	-2	-3	-3	-4	-4	5	0	-3	1	-2	3	-3	-2
2	0.98809	-2	-3	2	0	-4	-2	2	2	-3	-1	-4	-2	-3	-3	-3	3	-2	7	-2	-3	0	0	1	0	1	0.67	-2.647	-4.76	-0.228	1.399	0.98708	-2	-3	-1	4	-4	-1	3	3	-2	-5	-5	-2	-4	-5	1	0	-2
2	0.98553	0	-1	-1	-2	-2	2	-1	0	2	0	-2	-1	-1	1	0	1	-1	-1	5	-2	0	0	1	0	1	-0.838	1.512	3.097	0.26	0.83	0.98434	0	4	-1	-1	-2	-1	0	3	-2	-3	-2	1	-2	-2	1	-1	-2
2	0.87463	1	-2	-1	-2	-2	0	-2	-2	-3	-2	-2	-2	-2	-3	-2	2	5	-3	-3	0	0	1	0	1	0	0.908	1.313	2.213	-0.032	0.326	0.87162	0	-3	0	-3	-2	-2	-3	3	-3	-1	-2	-2	4	-3	-3	1	1
2	0.93465	-2	5	-2	-3	-4	1	-2	4	-2	-5	-4	0	-3	-4	-1	-2	-3	-4	-4	-4	0	0	1	0	1	0.44	2.897	1.502	1.538	-0.055	0.9334	-3	-3	0	7	-5	-1	2	-3	0	-5	-5	-2	-4	-5	-3	-2	-2
2	0.42532	-1	3	3	2	-2	0	1	-4	-4	-3	-1	2	-2	-5	0	0	-1	-6	-3	-4	1	0	0	0	1	-0.277	1.648	0.533	1.831	-0.561	0.34011	0	0	-1	0	-3	-2	-3	-1	-3	3	0	1	2	-1	-4	2	-1
2	0.62904	-2	0	-2	-2	0	-2	-2	0	-2	0	3	-1	0	1	-1	-1	-1	-3	0	0	0	0	1	1	0	-1.005	1.212	2.219	-0.663	-1.524	0.55651	-2	0	2	0	-3	-1	2	0	-1	-2	-3	-1	-3	-1	0	0	3
2	0.55766	0	2	-1	0	-5	0	2	-3	-4	1	0	3	3	-1	-2	-2	-2	-5	-2	-1	1	0	0	0	1	0.113	-0.837	1.477	1.357	-1.453	0.52401	-4	-4	-5	-5	-4	0	-2	-6	-5	1	5	-2	3	-1	-5	-1	-1
2	0.012528	-2	-2	-2	-1	2	1	7	-4	-3	-5	-5	0	-4	-6	-4	-1	-3	-5	-4	-5	1	0	0	1	0	0.113	-0.837	1.477	1.357	-1.453	0.012731	-3	-3	-1	-4	-1	-3	-1	-4	6	1	0	-3	1	5	-4	-3	-2
2	0.40307	-1	-2	-3	-3	0	1	-1	-1	-3	0	3	2	4	-3	-4	0	-1	-4	-3	-1	1	0	0	1	0	1.266	-0.912	-1.505	-1.019	-0.987	0.38602	-1	1	-1	-1	-4	-3	1	-4	-3	2	1	-3	1	4	-3	-2	-2
2	0.024199	4	-4	-3	-4	0	-3	-3	-2	-4	-1	-3	-3	2	-4	-4	3	0	-5	-4	3	0	1	0	1	0	1.242	-1.262	-0.544	-1.337	-0.279	0.024369	-3	-5	-5	-5	-3	-5	-5	-6	-5	6	0	-5	-1	-3	-5	-4	-3
2	0.36761	-1	2	1	0	-1	0	-2	-3	-1	-4	-4	5	-4	-5	1	2	-2	-5	-3	-4	0	0	1	0	1	-0.277	1.648	0.533	1.831	-0.561	0.34132	0	1	-1	1	-5	1	4	-3	-2	-4	-5	0	-4	-5	5	-1	-1
2	0.37496	-1	-4	-5	-5	2	-4	-5	-5	-2	-2	-2	-5	-2	7	-5	-4	-4	4	5	-3	0	0	1	1	0	-0.397	0.412	1.891	-1.006	-0.59	0.42645	-3	-2	-1	0	-5	2	6	-4	2	-3	-4	0	-3	-5	-3	-1	-1
2	0.23094	-2	-3	-4	-3	-5	-3	-3	-4	-4	-1	-1	1	1	-4	7	-3	-2	-5	-5	0	1	0	0	1	0	0.421	-1.392	-1.628	0.189	2.081	0.22047	-2	-3	-2	-4	-4	5	-2	-4	2	1	0	-1	0	-3	5	-3	-2
2	0.99849	0	0	0	0	-4	1	5	-4	-3	-4	-3	2	-4	-1	-3	0	-1	-4	-4	-4	0	0	1	0	1	0.113	-0.837	1.477	1.357	-1.453	0.99851	-1	-3	1	4	-5	-2	3	-1	-3	-5	-2	1	1	-5	-2	2	-1
2	0.59364	-2	0	2	-2	-3	0	2	-3	-3	1	-1	-2	-1	0	-3	-2	-2	-4	-2	4	0	1	0	1	0	1.242	-1.262	-0.544	-1.337	-0.279	0.55766	-1	0	-2	-2	1	-2	1	-3	-3	0	-1	2	-2	-3	-3	0	4
2	0.99191	-1	5	0	0	0	1	2	-4	1	-4	-3	2	-2	-5	-4	-1	-3	-5	-4	-5	1	0	0	0	1	0.44	2.897	1.502	1.538	-0.055	0.99194	-1	2	-2	0	-4	-1	1	-3	-1	1	4	0	-2	-2	-5	-2	-1
2	0.97079	-1	-2	2	1	0	-1	4	1	1	-4	-4	1	-3	-4	-3	1	-1	-4	-3	-1	0	0	1	0	1	0.113	-0.837	1.477	1.357	-1.453	0.97311	3	-2	-1	-3	-2	2	0	1	-3	-1	-1	0	-2	-4	-3	-1	1
2	0.21821	-4	-4	-5	-5	-2	-3	-4	-5	-1	-1	-2	-4	-1	7	-5	-2	-4	-1	7	-2	0	1	0	1	0	-0.838	1.512	3.097	0.26	0.83	0.18982	3	-5	-3	-4	0	-4	-4	6	-5	-5	-4	-4	-5	-5	-4	-2	-4
2	0.85442	2	0	1	-2	-4	2	-1	-1	-2	-1	-1	0	0	0	2	0	1	-3	-2	0	0	0	1	0	1	1.57	-0.146	-0.733	-0.591	-1.302	0.84401	1	-2	0	0	-3	1	0	0	-2	-1	-2	-1	0	-2	4	0	-1
2	0	0	0	0	0	0	0	0	0	0	0	0	0	0	0	0	0	0	0	0	0	0	0	0	0	0	0	0	0	0	0	0	0	0	0	0	0	0	0	0	0	0	0	0	0	0	0	0	0
2	0.96579	0	-2	-1	-2	-3	1	0	5	-2	-3	-3	-2	-3	-3	1	-1	-2	-3	-3	-3	0	0	1	0	1	1.045	2.064	1.33	-0.384	1.652	0.96281	-1	-1	-1	3	-3	3	3	3	-1	-3	-3	-1	-2	-3	-2	-1	-2
2	0.74598	-1	0	-2	-2	-5	2	3	-3	-1	-1	2	0	-1	2	-4	-1	-2	-5	-2	-2	1	0	0	0	1	-0.397	0.412	1.891	-1.006	-0.59	0.74718	-2	2	-3	-4	-4	2	-1	-4	-3	-1	4	1	0	-2	-5	-1	-2
2	0.82921	-1	1	1	-1	-4	4	2	-2	0	-3	0	2	-1	-4	-4	0	-1	-6	-3	-2	1	0	0	0	1	1.045	2.064	1.33	-0.384	1.652	0.82106	0	1	0	0	-5	1	3	-2	-1	-3	0	2	1	-3	-5	1	0
2	0.50739	-2	-3	-3	-3	-3	-2	2	-4	-3	5	0	-3	0	-2	-3	-3	-2	-4	-2	3	1	0	0	1	0	0.393	0.816	2.131	-1.239	-0.547	0.5202	5	-2	-2	-2	-2	3	-1	-1	-2	-3	-3	-1	-2	-3	-2	0	-1
2	0.61345	1	-2	7	0	-3	-1	-1	-1	-1	-4	-4	-1	-3	-4	-3	0	-1	-5	-3	-3	0	0	1	0	1	-0.169	0.933	1.299	0.945	0.828	0.63384	-1	4	-1	-2	-4	3	0	-3	-1	-4	-3	4	-2	-4	-2	2	-1
2	0.98954	1	-3	0	4	-3	-2	-1	4	-2	-3	-4	-2	-3	-4	-2	0	1	-4	-3	-3	0	0	1	0	1	1.045	2.064	1.33	-0.384	1.652	0.99016	-1	-1	-1	-2	-2	-1	-1	-2	-2	-2	-2	1	-2	-3	-2	2	5
2	0.29675	-2	-3	-3	-3	-4	-2	1	-4	-3	-4	0	1	-3	-4	7	-2	-3	-5	-4	-3	1	0	0	0	1	0.421	-1.392	-1.628	0.189	2.081	0.30603	-2	-4	-4	-5	-3	-4	-4	-5	-5	4	2	-4	3	-2	-4	-3	1
2	0.95361	1	-1	-2	-5	-4	0	-2	-5	-1	1	4	0	0	0	-5	-1	0	-2	0	1	1	0	0	1	0	1.57	-0.146	-0.733	-0.591	-1.302	0.95399	0	0	0	0	-4	3	3	-3	0	0	-2	1	-2	-4	-4	1	1
2	0.72527	0	0	0	-1	-3	3	3	-4	1	-1	-2	2	-1	-5	-3	0	0	-5	-4	-1	1	0	0	0	1	-0.503	-1.853	-3.005	0.931	-0.179	0.70364	1	-1	-1	0	-4	2	4	-2	2	-3	-3	2	-3	-4	-4	0	-1
2	0.81523	-1	0	0	-2	-1	1	1	-4	-1	0	1	3	2	-2	-4	-1	0	0	-1	-1	1	0	0	0	1	-2.128	-0.184	0.672	-0.595	0.009	0.8187	0	0	-1	0	-4	2	2	-3	-2	0	2	1	-1	-2	-4	0	-1
2	0.20689	3	-3	0	0	0	-2	-3	3	1	-2	-4	-1	-2	-4	-2	3	-2	-5	1	-3	1	0	0	1	0	1.57	-0.146	-0.733	-0.591	-1.302	0.18804	1	3	1	-1	-5	1	0	-3	1	-1	-2	2	0	0	-2	-1	-2
2	0.095689	1	-5	-3	-4	5	-4	-1	4	-4	-2	-1	-4	-1	-2	-4	2	-2	-5	-2	-3	1	0	0	1	0	1.045	2.064	1.33	-0.384	1.652	0.092794	-3	3	0	-3	-6	2	-1	-4	-3	-5	-5	6	-1	-6	-4	-2	-3
2	0.51452	-1	0	3	2	-4	-2	-2	-4	-3	0	-3	3	0	-5	-4	2	3	-5	-4	-2	1	0	0	0	1	0.908	1.313	2.213	-0.032	0.326	0.49994	-3	-1	1	-1	-4	2	3	-3	-3	3	0	1	-3	-4	2	-3	-2
2	0.5779	1	-5	-5	-5	3	-4	-2	-5	-5	4	2	-4	-2	0	-5	-2	-3	-5	-3	4	1	0	0	1	0	0.393	0.816	2.131	-1.239	-0.547	0.60006	-2	-1	1	4	-5	1	4	-3	1	-4	-3	-2	-4	-5	-4	1	0
2	0.39803	-3	-3	0	5	-5	-1	5	-3	1	-4	-4	-1	-4	-5	-1	-2	-3	-5	-4	-4	1	0	0	0	1	0.113	-0.837	1.477	1.357	-1.453	0.33647	0	-2	0	2	-4	1	3	-2	-3	-3	-1	-2	1	-4	-3	2	3
2	0.27111	-3	3	1	-3	-4	2	-1	-4	1	0	3	1	-2	-3	-4	-2	0	-4	0	-2	1	0	0	0	1	0.44	2.897	1.502	1.538	-0.055	0.26719	2	-2	0	0	3	1	-2	-2	-4	0	1	-2	3	-4	-4	1	-2
2	0.3632	-2	3	-2	1	0	0	3	3	-3	-2	-3	-2	-1	-2	-4	1	-3	-5	-4	-4	1	0	0	0	1	1.045	2.064	1.33	-0.384	1.652	0.37408	-3	7	-2	-4	-2	-2	-2	-4	0	-5	-4	1	-4	-5	-4	2	-3
2	0.24624	-5	-3	-6	-2	0	-5	-5	-5	-5	1	-2	-5	-4	2	-6	-2	-2	12	-1	-4	1	0	0	1	0	-2.128	-0.184	0.672	-0.595	0.009	0.27641	1	-3	0	3	-2	4	4	-2	0	-5	-4	-1	1	-5	-4	1	-1
2	0.41219	-2	0	0	0	-4	4	1	1	-3	-4	0	0	1	3	-4	0	-1	-4	-3	-4	1	0	0	0	1	0.113	-0.837	1.477	1.357	-1.453	0.43567	1	1	1	-2	-4	0	-1	-2	1	-4	-4	4	-1	-5	-1	2	1
2	0.2697	-2	3	0	0	-4	1	1	-2	2	-3	-2	3	0	-2	2	-1	0	-4	-2	-2	0	0	1	0	1	0.421	-1.392	-1.628	0.189	2.081	0.22883	-1	0	-1	2	-5	2	2	-4	1	0	-4	3	-4	-2	1	0	-1
2	0.054048	-3	-4	-5	-5	-5	-2	-4	-5	3	-3	-1	-4	-3	5	-2	-4	-4	-1	8	-2	1	0	0	1	0	-0.838	1.512	3.097	0.26	0.83	0.058508	2	2	2	-3	-4	2	-1	-3	-1	-1	-2	2	-2	0	-4	0	1
2	0.15558	-2	-3	2	6	-5	-2	4	-4	0	-3	-3	-3	-4	-1	-4	-3	-3	-5	-4	-1	1	0	0	0	1	0.113	-0.837	1.477	1.357	-1.453	0.16735	-1	-1	-3	-3	0	1	1	-1	0	2	0	1	-1	-4	-4	0	0
2	0.13093	-3	-6	-6	-6	-4	-5	-6	-6	-6	5	-1	-5	0	-3	-5	-4	-3	-6	-4	6	1	0	0	1	0	1.242	-1.262	-0.544	-1.337	-0.279	0.13975	-4	-5	-5	-6	-4	-5	-6	-6	-2	5	4	-6	-1	4	-6	-5	-4
2	0.37826	-2	1	0	-1	-4	-1	-1	-2	1	1	2	2	1	0	-2	-2	-2	-2	-3	1	0	0	1	0	1	0.393	0.816	2.131	-1.239	-0.547	0.33081	-3	0	-1	2	-5	1	3	-1	-2	-3	-3	4	-4	-3	-4	-1	1
2	0.19092	-1	-3	0	-1	-4	2	0	-1	-1	-4	-3	0	-3	-4	6	2	0	-4	-4	-3	0	0	1	0	1	0.908	1.313	2.213	-0.032	0.326	0.2086	-4	2	-4	-1	-2	0	-2	-2	-2	-5	-4	4	-1	-1	-3	-3	-2
2	0.88384	-1	0	-2	1	-3	1	-1	-4	-3	-3	-1	0	-3	-4	-1	0	6	-5	-4	-3	0	1	0	1	0	0.908	1.313	2.213	-0.032	0.326	0.86508	-3	-4	-4	-5	3	-4	-5	-2	-4	5	0	-4	3	1	-5	-2	-1
2	0.41417	0	-1	-3	-2	0	0	-1	-2	-2	2	1	-3	1	-3	2	-1	2	-5	-4	1	0	1	0	1	0	0.393	0.816	2.131	-1.239	-0.547	0.33585	3	-4	-4	-4	3	-2	-3	-2	-1	3	0	-4	-3	0	1	-1	-2
2	0.71039	-1	-1	1	-2	-4	3	3	-3	1	-2	-3	-2	-2	-4	-2	2	4	-4	-4	-2	0	1	0	0	1	0.113	-0.837	1.477	1.357	-1.453	0.67861	-2	-4	-4	-1	-4	2	-2	-4	3	2	0	-3	2	1	-1	-1	0
2	0.99621	1	-2	-3	-3	-4	5	-1	1	0	-4	-4	-1	-3	-4	5	-1	-1	-4	-1	-4	0	0	1	0	1	-0.503	-1.853	-3.005	0.931	-0.179	0.99665	-1	-3	-1	1	-5	6	-1	1	-2	-4	-3	-2	-3	-3	1	-2	-3
2	0.99554	-1	-3	-3	-3	-4	4	-2	-1	-1	-4	-4	-2	-3	-1	3	1	1	-2	6	-3	0	0	1	0	1	0.67	-2.647	-4.76	-0.228	1.399	0.99547	2	-3	-3	-3	-4	4	-2	2	-3	-4	-4	-2	-3	-4	5	0	-2
2	0.73022	0	-1	0	0	2	-1	0	0	1	-1	-1	-1	-1	-1	0	2	0	0	-1	-1	1	0	0	0	1	0.67	-2.647	-4.76	-0.228	1.399	0.75403	0	-1	-1	0	-1	-1	0	0	0	-1	-1	-1	-1	-1	4	-1	0
2	0.69965	0	0	1	0	0	0	0	0	0	-1	0	0	-1	-1	0	0	2	-1	0	-1	1	0	0	0	1	0.908	1.313	2.213	-0.032	0.326	0.65477	0	0	0	0	0	0	0	-1	-1	1	1	0	0	0	0	-1	0
2	0.65477	0	0	0	0	0	0	0	-1	-1	1	1	0	0	0	0	-1	0	-1	0	1	1	0	0	1	0	1.242	-1.262	-0.544	-1.337	-0.279	0.58888	0	2	0	0	0	0	1	0	0	-1	-1	0	-1	0	0	0	0
2	0.67573	0	0	-1	-3	3	-2	-2	1	-3	-1	0	-2	0	-1	1	3	1	-4	-1	-2	0	0	1	1	0	0.908	1.313	2.213	-0.032	0.326	0.68206	1	-1	-2	-1	2	-3	-2	-3	0	3	2	-3	-1	-2	-2	-1	2
2	0.86706	-3	-3	-4	-5	-3	-3	-4	-3	-3	-2	0	-4	-1	3	-4	-3	-3	11	2	-3	0	0	1	1	0	-2.128	-0.184	0.672	-0.595	0.009	0.86474	3	-3	-1	-2	-2	-2	-2	5	-3	-4	-4	-2	-3	-4	-2	0	-2
2	0.86474	3	-3	-1	-2	-2	-2	-2	5	-3	-4	-4	-2	-3	-4	-2	0	-2	-3	-3	-3	1	0	0	1	0	1.045	2.064	1.33	-0.384	1.652	0.86237	3	-2	-2	-2	-2	-2	-2	-1	-2	-1	1	-2	-1	-2	2	1	-1
2	0.22429	-2	1	0	4	-2	3	0	-4	-3	-1	2	0	-1	-4	-4	-2	0	-5	-4	-1	1	0	0	0	1	-0.277	1.648	0.533	1.831	-0.561	0.17916	-3	0	-2	-3	-5	-1	-1	-4	-3	-5	-5	7	-4	-5	-3	-2	-3
2	0.020535	2	-2	1	-2	-5	-2	-3	4	-2	-5	-5	4	-4	-5	-4	-1	-3	-5	-5	-4	0	1	0	1	0	1.045	2.064	1.33	-0.384	1.652	0.02246	4	-3	-2	-2	2	-3	-3	-2	-3	-4	-4	-3	-4	-5	-3	5	0
2	0.40093	-4	-5	-6	-3	-4	-3	-4	-6	-5	4	5	-2	1	3	-6	-5	-4	-4	-2	1	1	0	0	1	0	-0.397	0.412	1.891	-1.006	-0.59	0.35697	0	0	0	0	-3	2	4	-1	-2	-5	-3	2	-2	-5	-3	2	-1
2	0.18237	0	-1	3	1	-3	3	-1	-1	-2	-2	-1	3	-2	-3	0	-1	-1	-5	-4	0	1	0	0	0	1	1.266	-0.912	-1.505	-1.019	-0.987	0.13591	-1	-4	-4	-4	-3	-4	-4	-4	-4	0	5	-4	2	0	-1	-4	-3
2	0.069464	-3	-5	-6	-6	-3	-5	-5	-6	-6	7	-1	-5	-1	-2	-5	-5	-3	-5	-4	3	0	1	0	1	0	0.393	0.816	2.131	-1.239	-0.547	0.052711	6	-4	-4	-4	-1	-3	-3	-2	-4	-3	-4	-3	-3	-4	-2	-1	-2
2	0.17637	3	-3	-3	-3	3	3	-2	1	-1	-2	-1	-2	-3	0	2	-2	0	-3	-2	-2	0	1	0	1	0	1.57	-0.146	-0.733	-0.591	-1.302	0.19877	-2	4	0	-1	-4	3	-1	-1	2	-3	0	2	-2	-2	0	0	-1
2	0.13336	-4	-4	-6	-6	-4	-4	-5	-6	-5	0	5	-5	5	0	-5	-5	-3	0	-3	0	1	0	0	1	0	-1.005	1.212	2.219	-0.663	-1.524	0.13432	1	4	-1	-2	1	0	1	-4	-2	-5	-5	4	-4	-5	-1	3	-2
2	0.25852	5	-3	2	-4	1	-2	-4	-3	3	2	-3	-3	-3	-4	-4	0	-3	2	-4	-1	1	0	0	1	0	1.57	-0.146	-0.733	-0.591	-1.302	0.3119	1	2	-3	-3	0	3	-3	1	-1	-2	0	-1	0	3	-3	0	-3
2	0.28625	-1	1	1	2	-3	0	3	-3	-1	-3	-3	2	-3	-2	-2	0	-2	7	-2	-3	1	0	0	0	1	-0.259	-3.242	-3.656	1.05	0.302	0.25968	-2	-2	3	3	-4	1	4	-2	0	-4	-4	0	-3	-4	-2	1	-2
2	0.18479	-1	-3	0	4	-4	-2	-1	-2	-3	-4	-4	0	-3	-5	4	2	3	-5	-4	-4	0	0	1	0	1	0.908	1.313	2.213	-0.032	0.326	0.19924	1	-1	-2	1	-5	0	3	-3	-2	-4	-4	-1	-4	-5	6	-1	-2
2	0.69171	-1	-1	-1	0	-1	-1	-1	-1	-1	4	0	-1	-1	1	0	-1	-1	-1	0	0	0	0	1	1	0	0.393	0.816	2.131	-1.239	-0.547	0.7081	-1	0	0	4	1	0	0	-1	-1	-1	-1	-1	-1	-1	0	0	-1
2	0.085084	2	2	-1	-1	-2	0	1	2	2	-2	-2	-1	-1	-3	-3	1	0	-5	-3	-1	0	1	0	0	1	0.44	2.897	1.502	1.538	-0.055	0.089811	-2	-2	-4	-2	-3	-3	-1	-3	2	0	2	-3	-1	2	-2	-3	2
2	0.1024	2	-1	-1	0	-3	1	4	-2	-4	-5	-3	3	-3	-1	-1	0	-1	-6	-5	-3	0	0	1	0	1	0.113	-0.837	1.477	1.357	-1.453	0.1274	2	-4	1	4	-5	-1	2	-4	-4	-2	-3	-2	-4	-6	3	-2	-3
2	0.040868	-4	-3	-3	-2	2	2	6	-5	-3	0	-4	-2	-4	-3	-4	-3	-3	-5	1	0	0	1	0	1	0	1.242	-1.262	-0.544	-1.337	-0.279	0.049833	-1	-3	3	-3	-4	1	-3	-4	7	-3	0	-3	5	2	-4	-1	0
2	0.12677	0	-3	3	2	-2	3	4	1	-3	-2	-4	-2	-3	-5	-4	0	0	-5	-3	-4	1	0	0	0	1	-0.259	-3.242	-3.656	1.05	0.302	0.1307	2	0	1	2	-4	1	0	-1	-2	2	-3	0	-1	-5	-4	1	-1
2	0.51952	-2	0	-1	3	-4	4	3	-4	-3	-1	-1	0	-2	-4	-3	0	-2	-4	-4	-3	1	0	0	0	1	-0.503	-1.853	-3.005	0.931	-0.179	0.49906	0	-4	-2	0	-1	-3	-1	-2	-3	3	0	-3	-1	2	-2	1	-2
2	0.36139	0	1	2	2	0	1	0	-1	-1	-2	-3	1	-1	-3	-1	1	1	-3	-2	-1	0	0	1	0	1	0.908	1.313	2.213	-0.032	0.326	0.33832	0	-1	2	0	3	-1	-1	3	-2	-1	-1	-1	1	-1	0	-1	-1
2	0.93656	-3	-3	1	1	3	-3	0	0	3	1	0	1	-3	-4	1	0	1	-5	-4	0	0	0	1	0	1	-0.259	-3.242	-3.656	1.05	0.302	0.92638	0	3	0	2	0	-1	2	0	-3	0	-2	0	-4	-1	-1	1	-3
2	0.27183	2	0	-3	-2	-4	1	3	-3	4	-2	0	-1	2	-4	-4	1	1	-5	-4	-3	0	1	0	1	0	1.57	-0.146	-0.733	-0.591	-1.302	0.25492	-3	-2	-2	-5	-4	1	-4	-5	-4	4	1	-4	0	3	-5	-1	-1
2	0.48289	-2	-3	-4	-4	-3	-3	-3	-4	-4	1	4	-3	2	-2	3	-3	-2	-3	-3	3	1	0	0	1	0	1.242	-1.262	-0.544	-1.337	-0.279	0.51059	-1	-3	-2	-3	-3	-3	-3	6	-3	2	-3	-3	-2	-3	-3	-2	-2
2	0.99017	-1	2	0	0	-4	0	-1	1	-3	0	0	-1	1	-4	0	2	-1	-4	-2	0	0	0	1	0	1	1.045	2.064	1.33	-0.384	1.652	0.98941	1	-1	-2	0	-2	2	1	0	2	0	-2	-2	-1	-2	0	2	-2
2	0.67049	0	1	1	2	0	-1	0	3	1	-5	-3	0	-1	-4	-2	0	-2	-5	0	-5	0	0	1	0	1	1.57	-0.146	-0.733	-0.591	-1.302	0.69931	-2	-2	0	-1	1	0	0	-3	1	2	1	-1	0	1	0	-1	0
2	0.19245	-2	-4	-4	-4	-1	-4	-4	-4	-4	2	3	-4	1	4	-4	-4	-3	2	0	3	0	1	0	1	0	0.393	0.816	2.131	-1.239	-0.547	0.1789	-3	-3	0	-4	-4	-3	-4	-4	-1	-2	-1	-4	-2	5	-4	-3	-3
2	0.21439	-2	-1	1	1	-4	-1	-1	4	-2	-3	-1	-1	-2	-4	1	1	1	-5	-1	-4	0	0	1	0	1	1.045	2.064	1.33	-0.384	1.652	0.18426	-1	-3	4	0	-4	0	1	1	3	-5	-2	-2	-4	-5	-2	3	2
2	0.53529	-2	-4	-4	-5	-4	-3	-4	1	-3	-1	2	-4	5	2	-5	-3	-2	-2	5	-1	1	0	0	1	0	0.393	0.816	2.131	-1.239	-0.547	0.5854	-1	6	-2	1	-5	1	2	-2	0	-5	-4	2	-3	-5	-3	1	-1
2	0.92205	0	-3	-1	-3	-3	-3	-3	-3	1	-1	0	-1	-2	6	-3	-1	-1	-1	5	-2	0	0	1	1	0	-0.397	0.412	1.891	-1.006	-0.59	0.92014	-1	-3	3	-3	-4	-3	-3	6	1	-4	-4	-3	-4	-4	-1	-2	-3
2	0.28038	-2	-4	-5	-6	-3	-4	-5	-5	-4	2	4	-5	2	5	-5	-4	-3	-2	2	0	1	0	0	1	0	-0.838	1.512	3.097	0.26	0.83	0.30839	-3	3	-2	-3	-3	-1	0	-4	-3	-2	0	5	2	-3	-4	-1	-1
2	0.19659	2	1	-1	-3	-4	4	1	0	-1	-2	-1	1	-1	-1	-3	0	-1	-1	-1	-2	1	0	0	0	1	-0.503	-1.853	-3.005	0.931	-0.179	0.17808	-3	-4	-5	-5	-3	-4	-5	-6	-5	5	5	-4	2	-2	-5	-4	-3
2	0.012284	-3	-1	0	6	-6	1	5	-3	-1	-5	-5	-1	-4	-5	-3	-2	-2	-6	-4	-5	1	0	0	0	1	0.113	-0.837	1.477	1.357	-1.453	0.009621	-1	-4	-4	-5	6	-4	-4	-4	-5	1	2	-4	1	-2	-4	1	0
2	0.56028	-2	-2	2	-3	-4	-2	-3	-1	2	0	-2	2	-2	4	4	-3	-3	-4	-1	0	0	0	1	0	1	-0.169	0.933	1.299	0.945	0.828	0.59211	-2	4	-2	-3	4	5	-2	-4	-1	-1	-3	1	-1	-5	-4	-1	2
2	0.18584	1	-2	-1	-2	0	-1	3	-4	1	-2	1	-2	-1	-1	-3	-1	-2	4	5	-3	1	0	0	1	0	0.113	-0.837	1.477	1.357	-1.453	0.18009	-3	-3	3	0	-4	0	-1	-4	6	-3	-2	-1	-2	1	-2	0	-2
2	0.073355	-2	-4	5	3	-2	-2	0	-3	1	-2	-2	-1	-2	2	-3	-1	-3	-1	3	-2	0	0	1	1	0	-0.259	-3.242	-3.656	1.05	0.302	0.058994	4	-3	-3	-2	1	-3	-1	-1	0	-1	-3	-2	-4	-2	3	1	-2
2	0.037122	-2	-1	-3	-5	-3	2	-4	-5	-4	0	5	2	4	-2	-5	-3	-2	-2	-2	-2	1	0	0	1	0	1.266	-0.912	-1.505	-1.019	-0.987	0.034062	-2	-1	2	-2	-2	2	0	5	0	-5	-3	2	1	-5	-4	-2	-3
2	0.031749	-3	-4	-2	-4	-3	-3	-4	-5	2	0	1	-3	0	5	-3	-4	-3	0	7	-1	1	0	0	1	0	-0.397	0.412	1.891	-1.006	-0.59	0.027558	-2	-2	1	3	-6	3	4	-3	-2	-4	-5	0	-3	-5	1	0	-1
2	0.18818	-2	-3	4	1	2	-1	0	-4	2	-1	-2	-2	-3	2	-4	1	-2	-4	3	-2	0	0	1	1	0	-1.02	-0.255	-0.862	-1.343	0.465	0.18726	3	0	-2	-1	-3	0	0	-2	0	-1	-3	2	-1	-2	2	1	-1
2	0.63399	-1	-1	-2	-3	-5	6	-1	-4	1	-3	1	2	0	-1	-4	-1	1	-5	-3	-2	0	0	1	1	0	-0.503	-1.853	-3.005	0.931	-0.179	0.6343	3	-5	-5	-5	7	-4	-5	-4	-5	3	-3	-4	2	-3	-4	-1	-3
2	0.18942	0	-2	0	4	-5	3	3	-1	-2	-4	-1	-1	-1	-1	-2	1	-2	-5	0	-3	1	0	0	0	1	-0.503	-1.853	-3.005	0.931	-0.179	0.2015	3	0	2	-1	-4	2	-1	-1	-2	-4	-3	2	-4	-4	-4	2	0
2	0.90485	1	0	0	-3	-4	2	-2	3	1	-2	-2	-2	0	-3	2	1	-2	-1	-1	-2	0	0	1	1	0	1.57	-0.146	-0.733	-0.591	-1.302	0.90299	2	-1	0	-1	0	0	-3	1	-1	-1	-3	-2	2	-4	1	2	-1
2	0.98421	0	-1	0	1	-5	0	1	-2	2	0	-1	1	2	-1	1	1	-1	-5	1	-2	0	0	1	0	1	1.57	-0.146	-0.733	-0.591	-1.302	0.98484	0	-1	0	-1	0	1	0	-2	-1	-1	-1	0	2	-1	3	2	0
2	0.59754	1	0	-1	0	1	3	2	-3	0	-1	-2	-1	-1	-2	2	1	-2	-5	-1	0	0	0	1	0	1	-0.503	-1.853	-3.005	0.931	-0.179	0.61786	0	0	-1	0	-4	1	-1	-1	0	-2	-2	-2	1	-2	3	2	0
2	0.69676	1	-1	-3	-4	-3	-1	-3	-4	-3	-2	0	0	6	2	3	1	0	-4	-3	-1	0	0	1	0	1	1.57	-0.146	-0.733	-0.591	-1.302	0.62678	0	2	2	-3	0	-2	-2	4	0	-4	-4	-2	-4	-3	0	0	-1
2	0.005017	-5	-3	8	-2	-6	-3	-3	-3	3	-6	-6	-3	-5	-6	-5	-2	-3	-7	-3	-6	1	0	0	1	0	-0.169	0.933	1.299	0.945	0.828	0.005491	-2	-6	-6	-6	-3	-6	-6	-7	-6	8	-1	-6	-2	-3	-6	-5	-4
2	0.072344	-4	-1	-1	7	-3	-2	-1	-3	-2	-5	-5	-2	0	-5	-4	-1	-3	-6	-3	-1	0	0	1	1	0	-0.259	-3.242	-3.656	1.05	0.302	0.050307	0	-5	-5	-5	-4	-4	-5	-3	-5	1	4	-3	1	0	-5	-3	-3
2	0.13387	0	-2	-1	-4	-5	-3	-4	0	-2	-1	0	-3	0	1	5	-1	2	2	1	-1	0	0	1	1	0	0.421	-1.392	-1.628	0.189	2.081	0.1943	0	-3	1	0	4	-3	-3	-1	0	-1	-1	-3	2	1	-1	1	2
2	0.055841	2	-5	-3	-4	3	-4	-4	6	-4	-5	-5	-4	-5	-5	-4	-1	-3	-5	-5	-4	0	0	1	1	0	0.67	-2.647	-4.76	-0.228	1.399	0.056621	-2	-5	-3	-4	-5	-4	-5	7	-4	-6	-6	-4	-5	-6	-5	-3	-4
2	0.034606	0	-4	-5	-5	3	-4	-5	-3	-5	3	2	-5	-1	1	-2	-2	1	-5	-3	3	1	0	0	0	1	1.242	-1.262	-0.544	-1.337	-0.279	0.041107	2	-4	-4	-5	0	-4	-5	-2	-5	2	3	-4	-1	2	-5	0	0
2	0.041107	2	-4	-4	-5	0	-4	-5	-2	-5	2	3	-4	-1	2	-5	0	0	-2	-1	0	1	0	0	0	1	1.266	-0.912	-1.505	-1.019	-0.987	0.06004	2	-4	-4	-5	-2	-4	-4	0	-5	2	3	-4	-1	0	-5	-1	2
2	0.12966	-1	-4	-5	-6	-2	-4	-5	0	-2	-1	2	-3	1	5	-4	-3	-3	6	4	0	1	0	0	0	1	-0.397	0.412	1.891	-1.006	-0.59	0.13791	-1	-4	-5	-5	1	-4	-5	-3	-5	4	3	-4	0	-1	-5	0	0
2	0.11931	-4	-5	-6	-6	-4	-6	-5	-7	-2	6	1	-6	-2	-1	-5	-5	-4	-1	1	4	0	1	0	1	0	1.242	-1.262	-0.544	-1.337	-0.279	0.098716	1	2	-1	1	-5	0	2	-4	1	-3	-2	2	-3	-4	2	0	0
2	0.004855	-3	0	-5	-6	-4	-5	-6	-6	0	0	2	-5	-2	3	-6	-5	-3	7	7	0	0	1	0	1	0	1.266	-0.912	-1.505	-1.019	-0.987	0.005219	-2	-6	-6	-7	0	-5	-6	-6	-3	-3	-2	-6	-2	6	-7	-5	-5
2	0.080554	-2	-5	-5	-4	-3	-2	-4	0	-5	-5	-5	-4	-5	-6	8	-2	-1	-6	-6	-1	0	0	1	1	0	0.421	-1.392	-1.628	0.189	2.081	0.079086	-1	-4	-1	-4	0	0	-3	5	4	0	-3	-4	-3	-5	-4	1	0
2	0.056099	-2	5	0	-1	-3	1	-1	-4	2	-2	0	3	1	-4	-5	-2	-3	-3	-4	-4	0	0	1	0	1	0.44	2.897	1.502	1.538	-0.055	0.049142	-3	0	-4	-5	-5	-1	-3	-4	0	-3	-4	-4	-3	1	0	-3	-2
2	0.010909	4	3	-4	-4	4	1	-3	-3	-4	-4	-4	-2	1	-5	-4	1	2	-6	-5	-3	0	1	0	1	0	-1.02	-0.255	-0.862	-1.343	0.465	0.009114	-2	3	1	0	-6	1	5	-3	0	-6	-6	2	-5	-6	-1	-2	-1
2	0.12083	-1	-3	0	1	-3	-2	-1	1	-2	-1	2	-2	4	0	-2	-2	1	0	-2	-1	0	0	1	1	0	1.266	-0.912	-1.505	-1.019	-0.987	0.10003	-2	-2	-1	-1	-3	-2	-2	6	-2	-4	-5	2	-4	-4	1	-1	-1
2	0.034227	-5	-3	-5	-6	-2	-4	-5	-6	3	-4	-2	-5	-3	2	-6	-5	-4	8	8	-4	0	0	1	1	0	-0.838	1.512	3.097	0.26	0.83	0.031991	-2	-5	-4	-4	-5	-4	-4	-4	-5	-5	-4	-4	-5	-6	8	-1	0
2	0.033854	-2	-4	-2	-2	-2	-4	-4	7	-4	-6	-6	-3	-5	-5	-4	-2	-4	-5	-5	-4	0	0	1	1	0	1.045	2.064	1.33	-0.384	1.652	0.026735	-3	7	-2	-4	2	-1	-2	-4	4	-5	-3	0	-3	-4	-4	-2	-3
2	0.049848	-3	-5	-4	-5	-3	-5	-5	-5	-5	6	-1	-5	-1	1	-5	-3	-1	-4	-3	4	0	1	0	1	0	1.242	-1.262	-0.544	-1.337	-0.279	0.048744	-3	-3	7	3	-4	-1	-1	0	-1	-4	-5	-2	-2	-5	-4	-1	-2
2	0.044759	0	-2	0	1	-2	-3	-3	6	-4	-5	-5	-1	-4	-5	-4	0	-3	-5	-5	-4	1	0	0	0	1	0.67	-2.647	-4.76	-0.228	1.399	0.034329	0	-2	-1	6	-5	0	3	-2	-3	-5	-5	1	-4	-5	-3	1	-2
2	0.87558	-1	1	0	-1	-3	6	2	-2	0	-3	-2	1	-1	-4	-2	0	-1	-2	-2	-3	1	0	0	0	1	-0.503	-1.853	-3.005	0.931	-0.179	0.88095	-2	-2	-4	-4	-2	-2	-3	-4	-3	1	4	-3	2	0	-3	-3	-1
2	0.17341	1	-2	6	0	-2	-1	-1	0	-1	-3	-3	-1	-2	-3	-2	1	-1	-3	-2	-2	0	0	1	0	1	1.045	2.064	1.33	-0.384	1.652	0.1605	-1	-2	-1	2	-3	-1	-1	1	-3	-4	-4	0	-3	-3	-2	5	0
2	0.89891	-1	0	0	4	-3	5	2	-2	0	-3	-3	1	-1	-4	-2	0	-1	-3	-2	-3	0	0	1	0	1	-0.259	-3.242	-3.656	1.05	0.302	0.9065	0	3	0	0	-1	0	0	-1	0	-1	-1	1	-1	-1	0	0	0
2	0.030146	-4	-5	-6	-6	-3	-5	-5	-6	-5	7	3	-5	-1	-2	-5	-5	-3	-5	-3	1	0	0	1	1	0	0.393	0.816	2.131	-1.239	-0.547	0.032027	-2	2	2	0	-5	-1	2	-4	8	-5	-5	1	-4	-3	-4	-2	-2
2	0.56165	0	-1	-1	-1	-2	-2	-1	4	-1	0	-1	-1	-2	-2	-1	-1	0	2	-2	-1	0	0	1	0	1	1.045	2.064	1.33	-0.384	1.652	0.51745	1	-2	-1	-2	-1	-1	-1	-1	-2	0	1	-2	-1	0	3	0	0
2	0.15824	-2	-5	-3	-3	-5	-4	-4	7	-4	-6	-6	-4	-5	-5	-4	-2	-4	-5	-5	-5	0	0	1	0	1	1.045	2.064	1.33	-0.384	1.652	0.15781	-3	-2	-2	2	-2	3	3	-4	-2	-3	-1	-2	7	-4	-4	-1	0
2	0.052521	-4	-1	-3	-4	-5	-3	-4	-5	6	-4	-4	-4	-3	1	-5	-4	-4	3	8	-4	0	0	1	1	0	-0.838	1.512	3.097	0.26	0.83	0.054115	-5	-5	-6	-7	-5	-4	-5	-5	-5	-5	-4	-5	-4	-1	-6	-5	-5
2	0.071467	3	-4	-4	-4	-4	-3	-3	-3	-4	-5	-4	-3	-4	-6	8	-2	-3	-6	-5	-4	1	0	0	1	0	0.421	-1.392	-1.628	0.189	2.081	0.075452	-2	-1	2	-1	-4	0	1	-3	-1	0	1	1	5	-2	-4	-2	-1
2	0.008735	-1	0	-4	-3	-5	-3	-4	0	-2	-2	0	4	-1	5	-5	-1	0	4	-1	-3	1	0	0	1	0	-0.277	1.648	0.533	1.831	-0.561	0.011545	0	-4	-6	-6	-2	-5	-5	-6	-5	1	4	-5	4	1	-5	-4	-2
2	0.55054	1	-3	-4	-4	-2	-3	-3	-4	-4	3	1	0	3	-2	-4	-3	-2	-4	-3	4	0	0	1	1	0	-1.005	1.212	2.219	-0.663	-1.524	0.53963	-1	-2	1	4	-3	-2	-1	-1	-2	-3	-4	-2	-3	-4	4	3	1
2	0.01219	-3	-5	-6	-6	-4	-5	-5	-6	-6	5	-1	-5	-2	-3	-5	-4	-3	-6	-4	6	0	1	0	1	0	1.242	-1.262	-0.544	-1.337	-0.279	0.011604	-4	-6	-6	-5	-2	-5	-6	-5	-6	7	-1	-5	-2	-3	-5	-5	-3
2	0.26441	4	-4	-4	-5	-3	-4	-4	-3	-4	0	-2	-4	-2	-3	-4	-2	-2	-5	-3	5	0	0	1	1	0	1.242	-1.262	-0.544	-1.337	-0.279	0.24196	-3	-5	-5	-5	-3	-4	-5	-5	-5	5	-1	-4	4	-2	-5	-4	-2
2	0.35865	0	-2	-2	1	-4	3	6	-2	-2	-4	-4	-1	-3	-3	-3	0	-2	-4	-3	-3	1	0	0	0	1	0.113	-0.837	1.477	1.357	-1.453	0.33329	4	-2	1	0	-3	-1	0	-1	-2	-2	-3	1	-2	-4	-3	1	0
2	0.034371	-3	-4	-5	-5	2	-4	-5	-5	-5	3	4	-4	6	1	-5	-4	-3	-4	-3	2	0	1	0	1	0	-1.005	1.212	2.219	-0.663	-1.524	0.032262	-2	-4	-2	-3	-5	-4	-4	7	-4	-6	-4	-4	-4	-5	-4	-2	-4
2	0.4349	2	-2	-3	-3	-4	1	-2	-2	-1	0	-3	2	-2	-5	5	0	-2	-5	-4	-2	1	0	0	0	1	0.393	0.816	2.131	-1.239	-0.547	0.3867	-3	7	-2	-1	-6	-1	-2	-4	-2	-5	-4	2	-3	-5	-4	-3	-3
2	0.44337	-2	-1	7	-1	-2	-1	-1	-1	-1	-2	-1	-1	-2	-2	-2	-1	1	-3	-2	-2	0	0	1	0	1	-0.169	0.933	1.299	0.945	0.828	0.43359	3	-3	-1	-2	-3	-1	-2	-1	-3	-4	-4	-2	-3	-4	2	5	-1
2	0.91755	-1	0	0	1	-3	-1	3	-2	-2	-3	-2	5	-3	-4	0	-1	0	-4	-3	-1	0	0	1	0	1	-0.259	-3.242	-3.656	1.05	0.302	0.92281	0	-3	-2	0	-3	-2	1	5	-3	-2	-3	-1	-1	-3	-2	0	-1
2	0.47468	-2	6	-2	-3	-2	-1	-2	-2	-2	-4	-3	3	-2	-3	-3	-2	1	-3	0	-3	1	0	0	0	1	0.44	2.897	1.502	1.538	-0.055	0.46694	-1	-3	1	-3	-3	-2	2	-3	-3	4	-2	0	-2	-3	-3	-1	-2
2	0.53653	1	0	3	-2	-3	-2	2	0	-3	-4	-4	0	-3	-3	-3	4	-1	-4	-4	-4	1	0	0	0	1	0.113	-0.837	1.477	1.357	-1.453	0.54537	-2	-3	-3	-2	-2	-2	-3	-4	2	-3	-2	-3	-1	3	-4	-3	-3
2	0.18744	-2	-3	-4	-4	-3	-3	-4	-4	-4	1	5	-3	0	3	-4	-3	-3	-3	-2	-1	1	0	0	1	0	1.266	-0.912	-1.505	-1.019	-0.987	0.20432	2	0	-2	-2	-3	6	-1	-3	-2	-1	-3	-1	-2	-3	-2	-1	1
2	0.006419	-4	7	-2	-3	-6	-1	-2	-5	-3	-6	-5	3	-4	-5	-4	-3	-4	-5	-4	-5	1	0	0	1	0	0.44	2.897	1.502	1.538	-0.055	0.006697	1	-1	-2	-5	-3	0	-4	-1	-3	-1	4	-2	7	-3	-5	-1	-2
2	0.15415	-4	-5	-6	-6	-4	-5	-5	-6	-5	6	2	-5	2	2	-5	-5	-2	-4	-3	2	0	1	0	1	0	1.242	-1.262	-0.544	-1.337	-0.279	0.14971	-1	-1	-2	-2	-4	-2	3	-4	-1	0	-1	1	-3	1	-4	0	0
2	0.17034	-4	-5	-5	-5	-5	-5	-5	-5	-3	-3	-2	-5	-2	8	-3	-3	-1	1	3	-3	0	1	0	1	0	-0.397	0.412	1.891	-1.006	-0.59	0.15495	-4	-5	-6	-6	-4	-4	-5	-6	-5	-1	6	-5	0	-1	-5	-5	-4
2	0.1504	-4	-4	-1	8	-6	-2	1	-4	-3	-5	-6	-2	-5	-6	-4	-3	-3	-6	-5	-5	1	0	0	0	1	-0.259	-3.242	-3.656	1.05	0.302	0.17345	-4	8	-3	-4	-6	0	-2	-5	-1	-5	-5	0	-4	-5	-4	-3	-2
2	0.19812	-3	-4	-4	-4	-3	-4	-4	-4	-1	2	4	-4	-1	1	-4	-4	-3	-2	6	-1	0	0	1	1	0	0.393	0.816	2.131	-1.239	-0.547	0.21469	-1	-2	3	4	-2	-1	2	-3	-2	-4	-3	-2	-4	-4	-3	2	0
2	0.009305	-4	-4	7	-2	-5	-3	-4	-4	-3	5	-3	-3	-3	-4	-5	-3	-3	-6	-4	-2	1	0	0	1	0	-0.169	0.933	1.299	0.945	0.828	0.008231	-2	-5	-5	-6	-4	-5	-5	-6	-6	5	1	-5	-1	-3	-5	-4	0
2	0.30005	-1	-3	1	-1	-4	-2	0	6	-3	-5	-3	-2	-4	-4	-3	0	-1	-4	-4	-4	0	0	1	0	1	1.045	2.064	1.33	-0.384	1.652	0.24575	-3	-2	2	-1	-4	0	-1	-2	1	0	1	2	-1	4	-1	-2	-2
2	0.022186	3	-4	-5	-5	-3	-4	-4	-2	-5	1	4	-4	1	0	-4	-2	0	-4	-3	2	1	0	0	1	0	1.045	2.064	1.33	-0.384	1.652	0.027966	1	-1	-1	-2	-4	-2	-3	2	-2	-3	-2	3	1	-3	-3	2	2
2	0.083166	0	-2	7	1	-4	-2	-2	-2	-1	-3	-4	-2	-3	-4	-3	1	-1	-5	-4	-4	1	0	0	1	0	0.67	-2.647	-4.76	-0.228	1.399	0.063771	5	-3	-3	-3	-2	-2	-2	-2	-3	-2	0	-2	-2	-3	-3	1	-1
2	0.92621	-2	-2	0	5	-4	0	3	1	-2	-2	0	-1	-2	-3	-2	-1	-2	-4	-3	-3	0	0	1	0	1	-0.259	-3.242	-3.656	1.05	0.302	0.92347	4	-2	-3	-3	-1	-2	-2	-1	-2	-1	1	-2	3	2	-2	0	-1
2	0.63894	-1	-2	-1	-2	-2	-1	-1	-2	3	-2	-2	-1	-1	-3	-2	1	6	-3	-2	-1	0	0	1	1	0	0.908	1.313	2.213	-0.032	0.326	0.61796	-1	-2	3	-1	-2	-1	-1	-2	-2	-2	-2	-1	-2	-3	-2	1	5
2	0.7369	-1	0	0	-1	-3	6	1	-2	0	-3	-3	0	-1	-4	-2	2	-1	-3	-2	-3	0	0	1	0	1	-0.503	-1.853	-3.005	0.931	-0.179	0.75867	3	-2	-2	-2	-1	-2	-2	-1	-3	0	-1	-2	-1	-2	-2	2	0
2	0.99138	0	-1	-1	0	-4	2	4	-1	-2	-3	-4	2	-3	-4	-3	1	0	-4	-3	0	0	0	1	0	1	-0.169	0.933	1.299	0.945	0.828	0.99128	-2	-3	-1	-3	-3	-3	-3	-3	-3	0	0	-3	2	0	5	1	0
2	0.21779	-2	-1	4	0	-2	-1	0	-2	6	0	-3	0	-3	-4	1	0	-1	-5	-3	-2	0	0	1	0	1	-0.169	0.933	1.299	0.945	0.828	0.23616	-2	0	-1	2	-4	3	2	-3	3	-1	-4	2	-3	-4	2	1	-1
2	0.39114	-3	3	1	0	-4	4	2	-1	3	-2	-1	2	-1	-2	-3	-1	-3	-4	-3	-3	0	0	1	0	1	-0.503	-1.853	-3.005	0.931	-0.179	0.36386	-1	-1	3	3	-5	4	3	-4	-1	-3	-4	0	-4	-5	0	-1	0
2	0.25451	-2	3	1	-1	-4	0	-1	2	4	-4	-3	3	-3	-4	-3	-2	0	-4	-1	-4	1	0	0	0	1	0.44	2.897	1.502	1.538	-0.055	0.25969	0	-2	-2	4	0	4	2	-4	1	-1	-4	1	0	-5	-3	-1	-1
2	0.18509	-3	0	0	7	-5	-1	2	-3	3	-5	-5	0	-4	-4	-3	-2	-3	-5	-1	-5	1	0	0	0	1	-0.259	-3.242	-3.656	1.05	0.302	0.20725	-4	-4	-5	-5	-4	-5	-5	-5	-3	-2	-1	-5	-2	8	-5	-4	-4
2	0.9921	-1	-3	-3	-1	-4	-2	3	-1	-3	-3	-3	1	-3	-4	3	1	2	-5	-4	2	0	0	1	0	1	-0.259	-3.242	-3.656	1.05	0.302	0.99191	1	1	1	0	0	2	-1	-1	0	-4	-4	-1	-3	0	1	2	1
2	0.99552	-2	3	-1	-3	-4	-1	-1	-2	-3	-4	-3	5	-4	-1	1	1	1	-5	-4	-4	0	1	0	0	1	0.44	2.897	1.502	1.538	-0.055	0.99604	1	3	-1	-3	2	-3	-1	-3	-3	-2	-2	0	-3	3	0	1	0
2	0.83336	-1	2	0	0	0	-2	-2	-3	-3	-3	-2	0	-3	-4	-3	4	4	-4	-3	-3	0	0	1	0	1	0.67	-2.647	-4.76	-0.228	1.399	0.82396	-2	-4	-2	-3	3	-3	-3	6	-3	-4	-4	-3	-4	-4	-3	-1	-1
2	0.73922	-2	-2	-4	-2	10	-4	-5	0	-5	-3	-3	-4	-3	-4	-5	-3	-3	-4	-4	-3	0	0	1	1	0	-1.02	-0.255	-0.862	-1.343	0.465	0.73663	-1	-4	1	-4	3	0	-3	-4	0	2	1	-3	-2	4	-4	1	0
2	0.69401	-2	-4	-4	-5	-3	-1	-4	-5	1	4	3	-4	-1	0	2	-3	-1	-4	-3	2	0	0	1	1	0	1.242	-1.262	-0.544	-1.337	-0.279	0.67925	2	-4	-3	-3	1	0	-3	3	-4	-2	0	-3	-3	-4	3	0	0
2	0.27389	-1	-3	2	1	-2	-3	-2	-3	-3	1	-1	-3	-1	-2	-3	0	-1	-4	-3	5	0	0	1	1	0	1.242	-1.262	-0.544	-1.337	-0.279	0.20414	-2	4	0	-2	-4	2	-1	-3	-2	-2	-2	2	-2	-4	5	-1	-1
2	0.8198	1	3	-2	1	-3	-1	-2	1	-1	-1	-2	2	-3	-4	1	1	-2	-4	-3	-3	1	0	0	0	1	1.045	2.064	1.33	-0.384	1.652	0.79794	1	-1	-1	5	-4	-2	0	2	-3	-3	-4	-1	-3	-4	-3	-1	1
2	0.36322	1	-3	-3	-3	1	-3	-3	-3	-3	3	2	-3	0	-2	-3	-2	1	-3	-2	4	1	0	0	1	0	1.57	-0.146	-0.733	-0.591	-1.302	0.39242	0	6	-2	-3	4	-1	-2	-3	-2	-3	-3	1	-2	-3	-3	-1	-2
2	0.4142	2	-2	1	0	-3	-1	2	1	2	0	-3	-2	-2	-3	-2	0	1	-3	-3	0	1	0	0	0	1	1.045	2.064	1.33	-0.384	1.652	0.42013	-2	1	0	-2	-3	-1	0	-3	-2	-2	1	5	-2	-2	-2	-2	-2
2	0.95167	2	-4	-3	-4	-3	-3	-4	5	-4	0	-3	-3	-3	-4	2	0	-2	-5	-4	1	0	0	1	0	1	1.045	2.064	1.33	-0.384	1.652	0.94783	-3	6	-2	0	2	-1	1	-4	2	-3	0	0	-3	-3	-4	-3	-2
2	0.9086	-1	2	1	1	-4	-1	2	-2	-2	-4	-4	5	-3	-1	-3	1	0	-5	-3	-4	0	0	1	0	1	-0.277	1.648	0.533	1.831	-0.561	0.90926	-2	-1	5	-1	-4	0	-2	3	-2	-4	-4	2	-3	-4	-3	2	-1
2	0.48785	-1	1	-3	-4	-5	-1	-2	-4	-1	-4	0	6	-3	-2	1	-3	0	-5	-4	-2	0	0	1	0	1	-0.277	1.648	0.533	1.831	-0.561	0.48331	-1	1	1	-1	-5	0	0	-2	1	-5	-5	6	-4	-5	-4	1	0
2	0	0	0	0	0	0	0	0	0	0	0	0	0	0	0	0	0	0	0	0	0	0	0	0	0	0	0	0	0	0	0	0	0	0	0	0	0	0	0	0	0	0	0	0	0	0	0	0	0
2	0.68297	-1	1	4	3	-5	1	2	-2	-1	-4	-3	1	-4	-5	0	-1	-1	-5	-3	-3	0	0	1	0	1	-0.169	0.933	1.299	0.945	0.828	0.7077	-1	0	2	2	-1	-2	1	-1	-3	-3	-3	0	-2	-2	-4	3	2
2	0.066242	3	-5	-4	-4	-5	-4	-4	-1	-5	-5	-5	-4	-3	-6	8	-2	-3	-6	-5	-3	0	0	1	1	0	0.421	-1.392	-1.628	0.189	2.081	0.068811	-3	-5	-5	-5	-2	-4	-4	-3	-5	2	-2	-4	-2	-5	7	-4	-3
2	0.042567	0	4	2	0	-5	2	2	-2	2	-3	-3	2	-3	-5	-4	-2	-3	-5	-4	-3	1	0	0	0	1	-0.259	-3.242	-3.656	1.05	0.302	0.064191	5	-4	-4	-4	4	-1	-3	-2	-4	0	-2	-3	0	-2	-4	-1	-1
2	0.33483	-2	-1	-2	-2	-4	-2	-2	-3	-3	-4	-3	0	-2	-4	8	-1	-1	-4	-3	-4	0	0	1	0	1	0.421	-1.392	-1.628	0.189	2.081	0.36813	-1	-2	2	1	-2	-2	-1	4	-2	-2	-2	-1	-2	-2	-2	-1	1
2	0.009792	-2	-5	-5	-6	1	-5	-5	-6	-5	2	1	-4	-1	5	-5	-4	-3	-2	2	5	0	1	0	1	0	1.242	-1.262	-0.544	-1.337	-0.279	0.007441	1	-5	-3	-4	-4	-4	-5	6	-4	-5	-5	-4	-4	4	-5	-2	-4
2	0.64479	2	-1	-2	-1	2	3	-1	-2	2	-3	-1	-3	-1	-3	2	1	0	-3	-2	0	1	0	0	0	1	-0.503	-1.853	-3.005	0.931	-0.179	0.70238	-4	-3	-2	-4	-5	-3	-4	-5	8	-5	-4	-4	-4	2	-5	-4	-4
2	0.43956	2	-3	4	-1	-2	-2	-2	1	4	-2	-4	0	-1	-4	2	1	-2	-5	-3	-4	0	0	1	0	1	-1.474	-0.078	-1.673	0.336	-0.417	0.53027	-2	-2	-1	-2	0	-2	1	-1	-2	-3	-1	1	-3	0	-3	4	3
2	0.0952	-3	0	-5	-5	3	2	-4	-5	-4	-1	5	-3	1	-2	-5	-4	-3	-4	-3	-1	1	0	0	1	0	1.266	-0.912	-1.505	-1.019	-0.987	0.10814	-3	-4	-5	-5	-3	-4	-4	-5	1	1	5	-1	2	-1	-5	-4	-3
2	0.72645	-1	-3	0	-3	-3	1	-1	-2	-3	0	3	-2	1	-2	-1	0	1	-3	-3	0	0	0	1	1	0	1.266	-0.912	-1.505	-1.019	-0.987	0.67986	-1	-2	0	2	-4	1	4	-2	-3	-4	-4	0	-3	-3	-1	0	-1
2	0.31174	-1	0	-1	-2	-3	-2	-2	-1	-3	-4	-4	-2	-3	-4	-3	6	1	-4	-3	-3	1	0	0	1	0	0.67	-2.647	-4.76	-0.228	1.399	0.24436	-3	-4	-4	-5	-3	-4	-4	-5	-4	1	5	-4	0	3	-4	-2	-1
2	0.46606	-4	-4	-5	-6	-4	-4	-5	-6	-4	3	2	-1	5	1	-5	-4	-3	-4	3	3	0	0	1	1	0	1.266	-0.912	-1.505	-1.019	-0.987	0.46992	2	-4	-1	2	-4	-3	-1	0	-4	-3	0	-1	-3	-4	3	2	-1
2	0.3809	-1	-2	-5	-5	-3	-4	-4	-5	-4	1	5	-2	0	1	-5	-4	-3	-3	-3	0	1	0	0	1	0	1.266	-0.912	-1.505	-1.019	-0.987	0.42238	-3	-4	-5	-5	-3	-4	-4	-5	-4	4	4	-4	2	2	-4	-4	-3
2	0.43369	-1	-2	-2	-3	-2	-1	-3	-3	-2	1	1	-2	7	-1	-3	2	-1	-3	-2	0	1	0	0	1	0	-1.005	1.212	2.219	-0.663	-1.524	0.40761	1	-2	-2	-1	4	1	2	-2	-2	-2	0	-1	-1	-3	-2	3	-1
2	0.19533	0	-4	-4	-4	-4	-3	-3	-4	-4	-1	0	-3	2	-4	7	-3	0	-5	-4	-1	1	0	0	1	0	0.421	-1.392	-1.628	0.189	2.081	0.19671	3	-3	-1	1	-1	1	-1	1	4	-4	-4	-3	-3	-4	0	3	0
2	0.049237	-1	-3	2	3	-5	0	-1	4	-2	-5	-3	-2	-4	2	-1	-1	-3	-4	3	-3	0	0	1	0	1	1.045	2.064	1.33	-0.384	1.652	0.041467	-2	-2	-5	-4	-4	-1	-4	-5	-5	0	-2	-4	1	3	3	-3	-3
2	0.29558	-3	-5	-5	-3	-5	-4	-4	-5	-3	-3	0	-4	1	-3	8	-4	-4	-3	-1	-4	0	0	1	1	0	0.421	-1.392	-1.628	0.189	2.081	0.19872	0	-2	0	1	-3	-1	-1	-1	-2	-4	-3	-2	-4	-4	-2	4	5
2	0.086096	-4	-2	-3	-5	0	-3	0	-6	1	-2	1	-1	3	1	-5	-4	0	-1	7	-3	1	0	0	1	0	-0.838	1.512	3.097	0.26	0.83	0.073729	5	-5	-4	-5	4	-4	-4	0	-5	-3	-1	-4	-3	-5	-4	-1	-1
2	0.13292	-2	6	-3	-4	-5	1	-3	-2	1	-5	-2	3	-2	-4	-4	-2	-1	3	0	-4	1	0	0	1	0	-0.277	1.648	0.533	1.831	-0.561	0.14041	0	-3	-2	-3	0	-3	-3	-3	0	-2	-4	-2	-3	-4	-4	5	3
2	0.35335	1	-2	-2	-3	-2	-2	-3	1	0	-1	-2	-2	-1	-2	2	-2	-1	-3	-2	4	0	0	1	1	0	1.242	-1.262	-0.544	-1.337	-0.279	0.41078	6	-4	-4	-4	-3	-3	-2	1	-4	-4	-4	-3	-4	-5	2	0	-2
2	0.084584	0	-4	-3	-3	-4	-4	-4	7	-4	-5	-5	-4	-4	-5	-4	-2	-4	-4	-5	-5	1	0	0	1	0	1.045	2.064	1.33	-0.384	1.652	0.083614	2	-1	-2	-4	-1	2	-3	-3	-2	0	2	-1	5	-2	-4	0	-1
2	0.048416	-1	-4	-2	-4	4	-4	-4	-4	-2	0	1	-4	-2	6	-4	-3	-3	-1	5	-2	1	0	0	1	0	-0.397	0.412	1.891	-1.006	-0.59	0.035628	-2	2	0	1	-4	1	5	-3	-2	-4	-2	-1	-3	-4	-3	0	0
2	0.54061	1	-3	0	0	1	2	-2	-3	2	1	-1	-3	-3	-2	-1	3	0	-1	-3	1	0	0	1	1	0	0.67	-2.647	-4.76	-0.228	1.399	0.51644	-1	2	-3	1	-2	-1	0	0	-2	-1	0	-1	0	-2	1	2	1
2	0.66306	-1	-1	1	1	-3	-1	-1	-1	-2	-2	-1	2	-4	-5	0	4	0	2	-5	-1	0	0	1	0	1	0.67	-2.647	-4.76	-0.228	1.399	0.6585	1	1	0	-1	-5	-1	-2	-3	-3	1	-1	0	1	-1	2	1	2
2	0.097294	0	0	2	3	-2	0	2	-1	-1	-2	-3	1	-4	-5	2	0	-1	-5	-1	-3	1	0	0	0	1	0.113	-0.837	1.477	1.357	-1.453	0.082789	-2	2	2	1	-5	1	1	-1	1	-1	-2	2	-4	-2	-1	-1	2
2	0.35964	-1	3	1	0	-5	0	0	-1	2	-1	-2	2	-4	-5	2	0	0	-5	-4	-1	1	0	0	0	1	-0.277	1.648	0.533	1.831	-0.561	0.42229	0	0	1	0	-5	2	-1	-1	1	-1	-1	1	-4	-1	-1	1	-1
2	0.77634	1	-2	1	-1	-4	1	-1	0	2	-2	-1	-1	-1	-4	-1	3	2	-4	0	-1	0	0	1	0	1	0.67	-2.647	-4.76	-0.228	1.399	0.73792	0	1	0	0	-1	-2	-2	-1	-1	0	-1	1	-2	-4	-1	3	2
2	0.44403	1	-2	-2	-1	-2	0	-1	-1	1	-1	1	-2	1	3	0	-1	0	-4	1	0	0	0	1	1	0	1.57	-0.146	-0.733	-0.591	-1.302	0.40822	1	0	0	-1	-4	1	1	-2	0	0	0	2	0	-2	0	0	0
2	0.49028	-1	-1	2	4	-5	1	0	-1	-4	-1	-1	0	1	-5	1	1	-3	-5	0	-1	0	0	1	0	1	-0.259	-3.242	-3.656	1.05	0.302	0.46936	1	1	-1	-1	-5	1	0	-1	0	1	-1	0	3	-1	1	0	-1
2	0.18161	2	3	1	-3	2	0	-2	0	-1	-4	-3	1	-4	-3	-1	1	0	-4	-2	-2	1	0	0	1	0	0.44	2.897	1.502	1.538	-0.055	0.12322	5	-4	-4	-4	-1	-3	-4	-1	-4	-1	-1	-3	-1	-1	-4	2	0
2	0.19157	4	-3	-3	-2	-1	-2	-1	3	-4	-1	-2	-2	-2	-2	-3	2	0	-2	-4	-2	1	0	0	1	0	1.57	-0.146	-0.733	-0.591	-1.302	0.1678	-2	4	-2	-2	-4	2	1	-4	-3	-1	-1	4	-3	-3	-1	-1	-1
2	0.23221	0	0	0	3	-2	0	2	-2	-1	-3	-3	1	-1	-5	3	1	1	-6	-5	-3	1	0	0	0	1	0.113	-0.837	1.477	1.357	-1.453	0.169	0	3	0	1	-4	1	-1	-3	0	-1	-2	1	-1	0	-1	1	1
2	0.12519	-1	-2	-5	-5	-4	-4	-5	-2	0	5	2	-4	2	1	-5	-4	-2	-4	-3	2	1	0	0	1	0	0.393	0.816	2.131	-1.239	-0.547	0.09954	-2	-1	-4	-5	0	-2	-4	-1	-4	2	2	0	1	1	-3	-3	0
2	0.076221	2	2	-4	-5	-2	-2	-3	-4	-4	1	0	4	-1	-3	-2	-2	1	-3	0	0	1	0	0	1	0	1.57	-0.146	-0.733	-0.591	-1.302	0.10147	2	-1	-2	2	-5	0	3	-1	-1	-5	-5	0	-4	-6	3	0	-2
2	0.005119	1	-5	0	-4	-1	-4	-4	3	-5	3	-2	-4	-1	-5	-5	4	-2	-6	-5	1	1	0	0	1	0	0.908	1.313	2.213	-0.032	0.326	0.006192	-2	-5	-6	-6	-3	-5	-5	-6	-5	3	3	-5	-1	3	1	-4	-1
2	0.10493	-2	-4	1	-4	-3	-4	-4	5	3	-2	-4	-4	-1	2	-5	-2	4	-5	-4	-2	0	0	1	1	0	1.045	2.064	1.33	-0.384	1.652	0.097337	-5	-5	-6	-6	-5	-5	-5	-6	-2	-1	-4	-5	-4	4	-6	-5	-5
2	0.090371	5	-5	-5	-5	5	-4	-4	0	-5	-1	-3	-4	-3	-4	-4	-2	-2	-5	-3	4	0	1	0	1	0	1.57	-0.146	-0.733	-0.591	-1.302	0.079118	-3	-5	-5	-5	-4	-4	-4	-5	-5	6	2	-5	-1	-1	-5	-4	-3
2	0.086691	-3	-5	-6	-6	-3	-5	-5	-6	-6	7	2	-5	-1	-2	-5	-5	-3	-5	-4	3	0	1	0	1	0	0.393	0.816	2.131	-1.239	-0.547	0.080211	-3	-5	-5	-6	-3	-5	-5	-6	-5	5	-1	-5	-1	3	-5	-4	-3
2	0.04929	-2	3	0	-3	-4	1	-2	-4	0	-1	1	-1	4	4	-5	-2	-2	2	-1	-2	1	0	0	1	0	0.44	2.897	1.502	1.538	-0.055	0.048348	3	-4	-3	-4	-4	-3	-4	4	-4	-4	-4	-3	-1	3	-4	2	-1
2	0.10927	3	3	0	-1	-4	2	1	2	-2	-5	-5	2	-4	-5	-4	1	-2	-5	-4	-4	1	0	0	1	0	-0.277	1.648	0.533	1.831	-0.561	0.075395	-4	-5	-6	-6	-3	-5	-5	-6	-5	5	4	-5	2	-1	-5	-5	-3
2	0.24209	-2	-5	-4	-5	-3	-5	-5	-6	-5	5	0	-5	0	-2	-3	-4	0	-5	-3	5	1	0	0	1	0	0.393	0.816	2.131	-1.239	-0.547	0.2114	-1	-4	-4	-5	-4	-3	-5	-5	-4	-1	3	-4	6	5	-5	-3	-1
2	0.030421	2	1	-3	-4	-3	-2	-1	-4	-3	-3	-2	5	-2	-4	-4	1	1	-2	-2	0	0	0	1	0	1	1.242	-1.262	-0.544	-1.337	-0.279	0.037862	1	-2	0	2	-5	2	5	-1	0	-5	-4	1	-4	-6	-4	1	-2
2	0.023728	-2	-5	-6	-6	-2	-5	-5	-6	-5	4	4	-5	4	-1	-5	-4	-3	-5	-4	3	1	0	0	1	0	0.393	0.816	2.131	-1.239	-0.547	0.022514	0	-4	-4	-5	5	-4	-4	-3	-5	-2	3	-4	0	-4	-4	0	5
2	0.40251	-2	-3	-2	1	-2	-2	-2	-3	-3	-2	1	-2	-1	-3	-2	0	6	-3	-3	-2	0	0	1	0	1	0.908	1.313	2.213	-0.032	0.326	0.35982	-2	-2	-3	-3	-3	1	-2	-3	-2	-3	-3	0	-3	-3	7	-2	-1
2	0.81144	1	-3	-3	0	-3	-3	-2	-2	-1	-2	0	-3	-1	4	4	1	0	-3	-2	0	0	0	1	0	1	1.242	-1.262	-0.544	-1.337	-0.279	0.80339	-1	-3	1	-2	-4	0	2	4	3	-4	-4	-1	-3	-4	1	1	0
2	0.004268	-3	-5	-4	-4	-5	-4	-4	-5	-5	-6	-6	-4	-5	-6	8	1	-3	-6	-6	-5	0	0	1	1	0	0.421	-1.392	-1.628	0.189	2.081	0.004427	-3	-5	-3	-4	-5	-5	-5	7	-5	-7	-7	-4	-6	-6	-5	-3	-4
2	0.16971	1	2	-1	-2	-4	2	1	0	4	-3	-2	0	-2	-1	2	-1	-1	-4	0	-2	0	0	1	0	1	0.44	2.897	1.502	1.538	-0.055	0.15557	-1	2	-3	-2	-3	-2	-3	-4	1	-2	2	-2	-1	-4	6	-2	-2
2	0.2917	-1	4	-1	-2	-5	-1	-1	-3	-1	-4	-5	5	-4	-4	3	1	-1	-6	-5	-4	0	0	1	0	1	-0.277	1.648	0.533	1.831	-0.561	0.30874	2	1	-1	-3	-5	-2	-3	-2	-3	-3	1	4	-2	-3	3	1	-2
2	0.026654	-2	-4	-3	-4	-4	-3	-4	-5	-3	-3	-4	-4	-4	-3	-4	-1	7	-5	2	-3	0	1	0	1	0	-0.838	1.512	3.097	0.26	0.83	0.02012	-2	-6	-4	-5	-6	-5	-5	8	-5	-7	-7	-5	-6	-7	-5	-3	-5
2	0.14821	1	3	1	2	-2	3	1	-2	1	-5	-4	2	-2	-2	-3	-1	0	-5	-1	-5	0	0	1	1	0	0.67	-2.647	-4.76	-0.228	1.399	0.13296	1	4	1	0	-5	2	1	1	2	-3	-3	1	-2	-3	-4	1	-2
2	0.021102	0	2	0	3	-6	-1	2	-4	-3	-5	-5	3	-5	-6	3	0	-1	-6	-5	-5	0	0	1	0	1	-0.277	1.648	0.533	1.831	-0.561	0.032962	-2	3	0	-1	-3	0	4	-2	0	-3	-4	2	-4	-4	-4	0	1
2	0.25967	0	1	0	3	-3	1	3	-3	2	-4	-3	2	-1	-2	-2	-1	-1	0	0	-3	0	0	1	0	1	-0.503	-1.853	-3.005	0.931	-0.179	0.21816	-2	-3	-3	-2	1	-3	-2	-3	-1	0	-1	-4	-2	3	6	-3	-2
2	0.40666	-1	-1	1	0	-3	-1	2	5	-2	-3	-3	1	-3	-3	-2	-1	-1	-3	-3	-3	0	0	1	0	1	-0.169	0.933	1.299	0.945	0.828	0.47652	-2	1	4	4	-3	1	0	-2	2	-4	-3	1	-1	-3	-2	1	-1
2	0.078225	5	-3	-3	-2	-3	0	-2	-1	-4	1	0	-1	0	-2	-4	-1	-1	-5	-3	0	1	0	0	1	0	1.57	-0.146	-0.733	-0.591	-1.302	0.088098	3	-3	-2	-3	4	-3	-3	-2	-4	-4	-2	-3	-3	-4	-3	5	-1
2	0.092881	-3	0	-2	-3	-5	-1	-1	-4	-3	-5	-5	7	-4	-5	-3	-2	-3	-5	-4	-5	1	0	0	1	0	-0.277	1.648	0.533	1.831	-0.561	0.086251	-4	-5	-5	-6	-5	-5	-5	-5	-3	-2	-1	-5	3	8	-6	-4	-4
2	0	0	0	0	0	0	0	0	0	0	0	0	0	0	0	0	0	0	0	0	0	0	0	0	0	0	0	0	0	0	0	0	0	0	0	0	0	0	0	0	0	0	0	0	0	0	0	0	0
2	0.15165	-1	-5	-5	-5	1	-4	-5	-5	-3	4	1	-5	1	-1	-5	-4	-3	0	-3	5	0	1	0	1	0	1.242	-1.262	-0.544	-1.337	-0.279	0.16883	-4	-2	8	-1	-5	-2	-2	-3	-2	-6	-6	-2	-4	-5	-4	-1	-2
2	0.12086	0	-5	-3	-4	-5	-4	-4	7	-4	-6	-6	-4	-5	-6	-3	-1	-4	-5	-5	-5	1	0	0	1	0	1.045	2.064	1.33	-0.384	1.652	0.11385	-1	-3	-2	-3	-3	-2	-2	-3	-3	-5	-5	-2	-4	-5	-3	7	0
2	0.10597	-4	-5	-6	-6	-4	-5	-6	-6	-6	7	1	-5	0	-2	-5	-5	-3	-5	-4	2	1	0	0	1	0	0.393	0.816	2.131	-1.239	-0.547	0.10269	1	2	-3	-4	0	3	-2	-3	-3	-1	1	2	5	-4	-4	-2	-3
2	0.11809	-2	-5	-3	-4	-5	-4	-5	7	-4	-6	-6	-4	-5	-6	-5	-3	-4	-5	-6	-6	0	1	0	1	0	1.045	2.064	1.33	-0.384	1.652	0.112	1	-3	-3	-4	-2	4	-3	-4	-3	-1	-2	-3	5	-3	-4	-1	2
2	0.13715	-3	6	-2	-1	-3	1	-2	-4	-3	0	-3	0	-2	-5	-4	-1	3	-5	-4	-2	1	0	0	0	1	0.44	2.897	1.502	1.538	-0.055	0.10998	-2	-2	3	4	-5	1	-1	5	-3	-6	-5	0	-5	-6	-4	-2	-3
2	0.17743	-1	-2	-2	1	-3	0	5	-1	1	-5	-5	-1	-3	-5	-1	2	2	-5	-3	-4	0	0	1	0	1	0.113	-0.837	1.477	1.357	-1.453	0.14508	0	-2	-4	-4	-2	-3	-4	-4	-4	0	-2	0	-2	-4	-4	1	3
2	0.8595	0	-1	0	-1	-1	-1	-1	-2	-2	-1	-1	-1	-1	-2	-1	1	5	-3	-2	0	0	0	1	0	1	0.908	1.313	2.213	-0.032	0.326	0.86259	-1	-4	-3	-4	10	-3	-4	-3	-3	-2	-2	-4	-2	-3	-3	-1	-1
2	0.42972	0	-2	-1	0	-2	-2	-2	5	0	-2	-1	-1	0	-1	-2	-1	-2	-2	0	-2	0	0	1	1	0	1.045	2.064	1.33	-0.384	1.652	0.45181	-1	1	0	0	-3	0	5	-2	-1	-2	-2	1	-2	-2	-2	-1	-1
2	0.32219	-2	-1	3	0	-3	-1	2	-1	0	-1	-2	1	-1	-3	-2	1	2	-3	-1	1	0	1	0	0	1	0.113	-0.837	1.477	1.357	-1.453	0.30648	-1	3	0	-2	-3	-1	0	-3	-1	-2	-2	4	-3	-4	-3	2	1
2	0.41519	-2	-3	1	2	-4	-3	-2	-3	-3	-4	-5	0	-4	-1	5	4	3	-5	-4	-4	0	0	1	0	1	0.67	-2.647	-4.76	-0.228	1.399	0.41423	-1	3	1	3	-5	1	1	-4	-3	-4	-1	4	-1	-5	1	-2	-3
2	0.26181	-4	0	1	-2	-4	-3	-4	-4	-3	-2	0	-1	1	7	-4	-3	-1	-2	3	-3	0	0	1	1	0	-0.397	0.412	1.891	-1.006	-0.59	0.22214	3	-3	-3	-4	5	0	-3	0	-4	-1	-1	-3	-2	-4	-3	2	1
2	0.22848	-1	-5	-3	-3	-5	-4	-4	6	-5	-5	-3	-4	-4	-5	-4	0	1	-5	-5	-2	1	0	0	1	0	1.045	2.064	1.33	-0.384	1.652	0.26182	3	-2	1	5	-5	0	2	-2	-1	-5	-5	0	-4	-6	-1	0	-1
2	0.10897	1	6	0	-2	0	1	-1	-4	-1	-3	-3	-1	-2	-3	-4	-1	0	3	0	-2	1	0	0	1	0	0.44	2.897	1.502	1.538	-0.055	0.10423	1	-4	-2	0	-4	-3	-3	4	-4	-5	-5	-3	-4	-5	-4	5	-2
2	0.22224	0	-3	0	6	-3	-2	1	0	-2	-2	-2	-3	-3	-4	0	1	-1	-2	-3	-2	0	0	1	0	1	-0.169	0.933	1.299	0.945	0.828	0.18935	-1	-1	-1	5	3	-1	1	-1	-2	-4	-2	2	-3	-3	1	0	0
2	0.03515	-2	2	-4	-5	-5	-2	1	-4	2	1	3	0	0	1	1	-3	-1	-3	2	-3	1	0	0	1	0	0.44	2.897	1.502	1.538	-0.055	0.024693	4	-4	2	-2	-2	-4	-4	1	1	-3	-4	-4	-4	-3	1	2	1
2	0.022047	6	-5	-5	-5	3	-4	-4	-3	-3	-3	-2	-4	-2	-4	-4	-2	-1	-6	-5	-2	1	0	0	1	0	1.57	-0.146	-0.733	-0.591	-1.302	0.029425	-3	-5	-6	-7	-5	-4	-6	-6	-2	-1	5	-6	2	6	-6	-5	-4
2	0.2496	-1	1	1	-2	-2	1	0	-1	2	-2	-2	-2	0	-2	-3	2	3	-3	-2	-1	0	1	0	0	1	0.67	-2.647	-4.76	-0.228	1.399	0.18869	0	0	-3	-5	-3	0	-4	-4	0	3	2	-4	-1	0	-5	-3	1
2	0.64442	-1	0	-1	1	-2	0	3	-1	2	-1	0	0	1	-1	-1	0	0	-2	-1	-1	0	0	1	1	0	0.113	-0.837	1.477	1.357	-1.453	0.68037	1	-1	0	2	1	0	2	-1	-1	-1	-1	-1	-1	-1	2	0	0
2	0.39268	-2	2	-2	3	-5	3	5	-2	1	-3	-3	-1	-2	-5	-4	-2	-2	-3	-4	-3	0	0	1	0	1	0.113	-0.837	1.477	1.357	-1.453	0.35209	-1	-3	-2	-3	-3	-3	-3	-3	-3	-4	-3	-3	3	-4	-3	7	-1
2	0.3669	-2	-4	-2	-3	-5	-4	-4	7	-4	-5	-5	-4	-5	-5	-4	-3	-4	-4	-5	-5	0	0	1	0	1	1.045	2.064	1.33	-0.384	1.652	0.37146	-3	0	-3	-3	-2	-1	-2	-5	6	1	1	-1	-1	2	-4	-3	-3
2	0.1275	6	-4	-4	-4	-3	-3	-3	-2	-4	-4	-3	-3	1	-4	-3	2	1	-5	-4	-1	1	0	0	1	0	1.57	-0.146	-0.733	-0.591	-1.302	0.16675	-3	-1	0	7	-5	-1	0	-3	-2	-5	-5	-1	-5	-6	2	-2	-3
2	0.17614	-4	-4	-6	-5	-3	-5	-6	-5	-6	1	6	-5	3	-1	-5	-5	-4	-5	-4	-1	0	0	1	1	0	1.266	-0.912	-1.505	-1.019	-0.987	0.20146	1	2	-2	-2	0	2	0	1	0	-3	-2	1	-3	-5	3	0	-1
2	0.020895	0	0	-1	2	-3	-1	0	0	0	-4	-4	1	2	-1	4	-1	-2	-3	2	-3	0	0	1	0	1	-0.169	0.933	1.299	0.945	0.828	0.024536	-2	-4	2	4	-4	-1	1	-1	1	-1	-3	-3	-4	-2	-4	1	4
2	0.21777	1	-4	-4	-4	-4	-1	-2	-4	-4	-1	1	-3	-3	-1	5	0	3	-5	-4	2	0	0	1	1	0	0.908	1.313	2.213	-0.032	0.326	0.21753	-2	-4	4	-3	-4	-2	-2	-2	-3	3	0	-4	0	1	-5	1	1
2	0.21781	-2	-1	1	-2	0	1	-3	0	-2	1	2	-3	5	-2	-2	-2	1	0	0	0	1	0	0	1	0	0.908	1.313	2.213	-0.032	0.326	0.17912	5	-3	-3	-2	-1	-1	-3	4	-3	-4	-4	-3	-3	-4	-3	1	-2
2	0.095696	2	-1	-4	-4	-3	-3	-3	-3	0	-2	-2	-3	0	0	2	-2	-3	1	7	0	0	0	1	1	0	-0.838	1.512	3.097	0.26	0.83	0.082132	-2	-1	-1	-3	-4	-3	-3	5	1	-4	-5	0	-4	-4	3	-1	-3
2	0.26165	-3	-4	-5	-5	-2	-3	-2	-5	-4	5	0	-4	8	2	-5	-3	-3	-4	-2	0	1	0	0	1	0	-1.005	1.212	2.219	-0.663	-1.524	0.27381	1	-3	0	-1	-3	-2	0	-4	-2	0	-1	-3	4	-2	-4	-1	4
2	0.35427	-1	0	2	0	0	1	1	0	0	-3	-3	2	-2	-3	2	0	-1	-3	-2	-2	0	0	1	0	1	-0.503	-1.853	-3.005	0.931	-0.179	0.3295	-2	0	2	5	-3	-1	2	0	-1	-3	-3	-1	-1	-3	-1	-1	-1
2	0.11979	-3	-4	-5	-5	-3	-4	-5	-6	-5	0	6	-4	0	-2	-1	-4	-1	-4	-3	0	1	0	0	1	0	1.266	-0.912	-1.505	-1.019	-0.987	0.11887	1	-4	-3	-5	-2	-4	-4	-3	-4	1	5	-4	0	-2	-2	0	0
2	0.11768	-2	7	-1	-3	-5	-1	-2	-4	-1	-5	-2	3	-2	-4	-4	-2	-1	2	-3	-4	1	0	0	1	0	0.44	2.897	1.502	1.538	-0.055	0.11549	4	3	-3	-4	-3	-1	-2	-3	-2	0	-1	-2	-1	-2	-3	0	-1
2	0.11648	1	-5	-3	2	-1	-3	-2	1	-4	4	0	-4	-1	-2	-4	-1	-1	-5	1	1	1	0	0	1	0	1.57	-0.146	-0.733	-0.591	-1.302	0.090077	-3	-4	-2	-5	-1	-2	-3	-3	-4	2	1	-3	-1	6	-1	-1	-2
2	0.69458	0	-1	0	1	-5	0	0	-2	2	-1	-1	0	1	-1	2	1	1	-5	0	-1	0	0	1	0	1	0.908	1.313	2.213	-0.032	0.326	0.64574	-1	1	-3	1	-5	-3	1	3	0	-1	-1	2	-4	-4	-1	-1	-1
2	0.084656	1	-3	-5	-5	2	-4	-4	-4	-5	3	2	-4	3	0	-1	-1	1	1	-4	3	1	0	0	1	0	1.242	-1.262	-0.544	-1.337	-0.279	0.081373	0	2	-1	-4	0	-2	-4	0	-4	0	2	-1	0	0	3	-2	1
2	0.36527	-3	0	-5	-5	-4	-4	-5	-6	-5	5	4	-3	2	1	-5	-4	-3	-4	-2	1	1	0	0	1	0	1.266	-0.912	-1.505	-1.019	-0.987	0.32989	0	0	1	-2	-4	-1	-2	4	1	-4	-3	4	-3	1	-4	-2	-2
2	0.75287	-1	-1	-3	-4	-2	-1	-3	-3	-3	1	3	-2	5	1	-3	0	0	-3	-2	0	1	0	0	0	1	1.266	-0.912	-1.505	-1.019	-0.987	0.71739	0	-2	-3	-2	2	0	-2	-3	-3	1	3	0	1	-2	-3	0	-1
2	0.14435	-2	5	-2	-2	-5	3	2	-4	-1	-5	-4	5	-3	-5	-4	-2	-2	-5	-4	-5	1	0	0	0	1	-0.277	1.648	0.533	1.831	-0.561	0.12653	-1	3	1	3	-5	3	-1	1	-2	-5	-5	2	-4	-5	0	-2	-2
2	0.39276	-2	-2	-2	-3	5	-2	-2	-3	6	1	1	-3	-1	2	-3	-2	-2	-2	1	1	0	1	0	1	0	0.393	0.816	2.131	-1.239	-0.547	0.39171	-3	7	-2	-3	-5	0	-1	-4	-2	-4	-4	1	-3	-4	2	-2	-2
2	0.41889	-1	3	-1	-2	-3	-1	-2	-2	-2	-2	-2	2	-2	-4	0	4	-1	-4	-3	0	0	0	1	1	0	0.67	-2.647	-4.76	-0.228	1.399	0.44387	1	-2	-1	-3	-3	-2	-2	-3	7	-1	-3	-2	-2	-3	0	1	2
2	0.18057	0	-4	-4	-3	-4	-4	-3	0	-2	3	0	-4	-1	-1	1	-4	-3	-1	0	5	0	0	1	1	0	-1.474	-0.078	-1.673	0.336	-0.417	0.20623	-3	3	-2	3	-5	2	0	-3	1	-4	-3	4	-1	-4	-1	-1	-3
2	0.35578	-2	3	-1	-1	-3	3	1	-4	3	-2	-1	1	0	-3	-4	-2	1	-3	1	0	0	1	0	0	1	-0.503	-1.853	-3.005	0.931	-0.179	0.45723	-1	-1	-1	1	-2	2	3	-3	-2	-2	1	0	-2	-4	2	-2	1
2	0.063109	-1	4	0	-4	0	-2	-3	-5	-2	-2	-2	1	-3	0	-5	-1	2	5	4	0	0	1	0	1	0	0.908	1.313	2.213	-0.032	0.326	0.064524	0	-5	-5	-5	1	-5	-3	-3	-1	4	0	-5	0	3	-5	-2	-3
2	0.24626	-1	-4	0	-2	3	-4	-4	-4	-5	1	-3	-2	-3	-4	-3	2	5	-5	-4	3	0	1	0	1	0	0.908	1.313	2.213	-0.032	0.326	0.22137	-3	-3	-5	-5	-1	-5	-2	-6	-2	6	1	-4	-1	0	-2	-4	-1
2	0.20724	3	-3	3	-2	3	-3	-3	0	-1	-2	-3	-3	-1	-2	-3	1	3	-1	-3	-1	0	1	0	1	0	0.908	1.313	2.213	-0.032	0.326	0.13589	-4	-3	-4	-5	-4	-2	-4	-5	-1	-2	0	-3	1	4	-5	-4	-2
2	0.481	1	2	-2	0	-5	3	2	-2	-2	-4	-3	4	-3	-2	-3	-1	-2	-3	-4	-4	1	0	0	0	1	0.113	-0.837	1.477	1.357	-1.453	0.41972	2	1	-2	0	-4	2	3	-2	-2	-1	-2	1	0	-4	-2	-1	0
2	0.18023	-1	-3	-4	-4	4	-3	-4	-4	-4	2	2	-3	0	0	-3	-2	0	-3	-2	4	0	0	1	1	0	1.266	-0.912	-1.505	-1.019	-0.987	0.16724	-1	-3	0	0	-4	-2	0	6	-2	-5	-5	-2	-4	-4	-3	-1	-2
2	0.13738	4	-3	-2	4	-3	-2	2	0	-3	0	-3	-2	-3	-4	-3	0	0	-4	-4	-3	1	0	0	0	1	1.57	-0.146	-0.733	-0.591	-1.302	0.13758	0	-4	-4	-4	8	-4	-4	-4	-4	1	1	-4	-2	-3	-4	-2	-2
2	0.47541	0	1	0	1	0	2	3	0	-1	-5	-3	3	-2	-4	-1	0	-2	-4	-1	-4	1	0	0	0	1	0.113	-0.837	1.477	1.357	-1.453	0.47995	-2	-3	2	-2	-4	1	0	-2	8	-4	-4	-2	-3	0	-4	0	-2
2	0.49948	-2	2	5	3	-4	-1	1	-2	-1	-4	-4	1	-3	-4	-3	1	0	-5	-4	-4	0	0	1	0	1	-0.169	0.933	1.299	0.945	0.828	0.49199	1	1	-3	-3	3	-2	-2	-3	-3	-4	-4	0	-3	-5	7	-2	-2
2	0.2922	-3	-3	-3	-3	-3	-3	-3	-3	-2	-1	1	-3	-1	7	-3	-3	-3	4	1	-2	0	1	0	1	0	-0.397	0.412	1.891	-1.006	-0.59	0.30006	-2	0	0	-2	-2	3	-1	-3	-2	-1	3	0	4	-1	-2	-2	-2
2	0.91995	-3	0	1	-1	-4	1	-1	-1	-3	-2	1	4	0	-1	-1	1	0	-4	-3	-1	0	0	1	0	1	-0.277	1.648	0.533	1.831	-0.561	0.91935	-3	-4	2	-4	-3	-4	-4	-2	-4	6	0	0	-2	-3	-4	-2	-1
2	0.92612	-3	4	2	-2	-4	2	-1	-3	5	-2	-2	2	-3	-4	-3	0	0	-4	-2	-3	0	0	1	0	1	0.44	2.897	1.502	1.538	-0.055	0.92188	-3	-2	1	2	-4	-1	-2	-3	9	-4	-4	-2	-3	-2	-3	1	-3
2	0.29802	-1	-3	0	2	-4	-1	2	-2	6	-1	-4	-1	-3	-4	-4	1	0	-5	-3	2	0	1	0	1	0	-1.474	-0.078	-1.673	0.336	-0.417	0.25672	-2	-4	-4	-5	2	-4	-4	-5	-4	3	1	-4	3	4	2	-3	1
2	0.19758	-1	-1	4	5	-5	-1	2	-3	-3	-2	-4	-3	-4	-5	1	-1	0	-6	-1	-2	1	0	0	0	1	-0.169	0.933	1.299	0.945	0.828	0.21315	-1	-1	-2	0	-5	6	0	-4	-1	-1	0	-2	2	-5	-4	0	-1
2	0.71509	2	-1	-3	-1	-3	-2	1	-2	-3	0	0	-1	-2	0	-1	1	3	-4	-3	0	0	0	1	0	1	0.908	1.313	2.213	-0.032	0.326	0.72497	1	0	-2	0	-3	2	1	-3	2	-3	-3	-2	2	0	4	2	-2
2	0.71289	2	-3	-1	-3	-3	-2	-3	2	3	-3	1	-3	-2	-1	1	2	-2	-3	-3	0	0	0	1	1	0	1.57	-0.146	-0.733	-0.591	-1.302	0.67986	1	2	-2	2	-3	1	-2	-2	-3	-3	-2	-2	-3	-3	-1	2	2
2	0.48894	-2	1	-2	-3	-3	-2	-3	-4	-4	-3	-3	-2	-3	-4	-3	-1	7	-5	-4	-2	0	1	0	1	0	0.908	1.313	2.213	-0.032	0.326	0.50752	-4	-5	-5	-6	-4	-5	-5	-5	-3	-2	1	-5	-2	8	-6	-4	-4
2	0.1242	-3	-4	-5	-5	4	-4	-5	-5	-5	2	4	-4	-1	-3	-4	-4	-2	-4	-3	5	1	0	0	1	0	1.266	-0.912	-1.505	-1.019	-0.987	0.11651	-3	-3	0	7	-5	0	-1	-1	0	-4	-4	-1	3	-5	-4	0	-2
2	0.13882	-3	3	-2	-4	-1	-1	-2	-5	4	0	2	1	-1	-1	0	-3	1	-5	-2	0	0	0	1	0	1	1.266	-0.912	-1.505	-1.019	-0.987	0.12436	-2	-5	-5	-5	-4	-4	-4	-5	-5	3	-1	-4	-3	-2	6	-4	-3
2	0.038176	-3	-3	-5	-5	-3	-3	-4	-4	-3	-2	0	-4	5	0	-5	-4	-3	11	0	-2	1	0	0	1	0	-1.005	1.212	2.219	-0.663	-1.524	0.035085	3	-3	-3	-3	-3	-2	-2	-2	-3	-3	-4	-2	-3	-4	7	-1	0
2	0.11481	-1	-3	5	-2	-4	-2	-3	-2	-2	-3	-4	-3	-3	-1	-4	0	1	9	0	-2	0	0	1	1	0	-2.128	-0.184	0.672	-0.595	0.009	0.11665	-3	-3	0	8	-5	-2	1	-3	-3	-5	-5	-2	-5	-5	-3	-2	-3
2	0	0	0	0	0	0	0	0	0	0	0	0	0	0	0	0	0	0	0	0	0	0	0	0	0	0	0	0	0	0	0	0	0	0	0	0	0	0	0	0	0	0	0	0	0	0	0	0	0
2	0.13093	-3	-2	3	3	-5	0	-1	5	-2	-5	-5	1	-5	-5	-2	-2	-3	-5	-5	-5	0	0	1	0	1	1.045	2.064	1.33	-0.384	1.652	0.10583	4	-2	-2	-2	-4	1	0	1	-2	-3	-1	2	-2	-4	-2	0	-2
2	0.046397	0	2	0	-2	-4	2	0	-3	3	-4	-2	0	2	-2	-3	2	2	-5	-3	-2	1	0	0	1	0	-1.474	-0.078	-1.673	0.336	-0.417	0.044418	-1	-4	-3	-5	-1	-4	-5	-5	-3	1	5	-4	2	1	-4	0	1
2	0.018465	-3	-2	-2	-3	-3	8	-1	-4	-1	-5	-3	-1	-2	-6	-4	-1	-1	-5	-4	-4	0	0	1	1	0	-0.503	-1.853	-3.005	0.931	-0.179	0.019482	-3	6	3	-3	-6	4	-2	-4	1	-5	-5	2	-4	-5	-4	-2	-1
2	0.018347	-3	-5	-5	-4	-3	-4	-4	-5	-5	-5	-5	-4	-5	-6	9	-3	-4	-6	-6	-5	1	0	0	1	0	0.421	-1.392	-1.628	0.189	2.081	0.013828	-4	-4	-6	-6	-4	-5	-5	-6	-5	3	6	-4	1	-1	-5	-4	-3
2	0.036648	-2	-5	-3	-5	2	-3	-5	-2	-2	4	-2	-4	0	-3	-5	-3	2	-5	-4	5	0	1	0	1	0	1.242	-1.262	-0.544	-1.337	-0.279	0.032394	0	-4	-3	-5	-1	-2	-4	0	-5	0	4	-4	2	-3	5	-2	-3
2	0.38103	-4	-4	-5	-6	-5	-4	-5	-6	-1	-4	-4	-4	-3	1	-6	-4	-4	0	10	-4	0	1	0	1	0	-0.838	1.512	3.097	0.26	0.83	0.30962	1	-3	-2	-3	-3	-3	-3	0	-4	-3	-4	-3	-4	-5	-3	5	4
2	0.79941	-2	0	2	1	-5	3	1	-1	-3	-2	-4	2	0	2	0	0	-1	-5	-4	-4	0	1	0	1	0	-0.503	-1.853	-3.005	0.931	-0.179	0.78976	-2	-2	-2	-2	0	-4	-4	1	0	1	2	-2	2	4	0	-1	-2
2	0.37277	-2	-4	-6	-6	0	-3	-4	-3	-6	6	2	-5	0	0	-6	-5	-2	-5	-4	4	0	1	0	1	0	1.266	-0.912	-1.505	-1.019	-0.987	0.32359	-1	4	-2	-3	-2	-2	-3	-2	2	-1	-4	1	-1	-3	-4	2	3
2	0.6586	0	-1	-1	-2	-5	-2	-3	6	-2	-3	-2	-2	-4	-3	-2	0	-1	-5	-1	-4	0	0	1	1	0	1.045	2.064	1.33	-0.384	1.652	0.63438	0	1	-1	-2	1	3	2	-2	-1	-4	-3	2	0	-3	1	1	-1
2	0.67004	-1	0	0	0	3	1	0	-1	2	0	-1	0	2	1	0	-1	0	-5	1	-1	0	0	1	0	1	-0.259	-3.242	-3.656	1.05	0.302	0.66276	-2	0	-2	-2	0	1	1	-3	-1	0	-1	2	0	0	-1	0	2
2	0.62072	0	0	0	0	1	1	2	-1	2	-2	-1	0	1	0	1	0	0	-5	0	-2	1	0	0	0	1	0.113	-0.837	1.477	1.357	-1.453	0.62355	-1	0	0	3	1	0	2	-2	3	-1	-2	0	0	-2	1	0	0
2	0.82101	-1	-1	-1	-2	-1	1	-1	-1	-1	2	1	-1	2	-2	0	0	1	-2	-3	1	0	1	0	1	0	0.393	0.816	2.131	-1.239	-0.547	0.79861	-1	-4	0	0	3	0	0	-1	2	0	-1	0	2	1	0	-1	0
2	0.013071	2	-5	-3	-5	1	-3	-4	0	-5	4	0	-4	0	-4	-3	1	-2	0	-4	3	1	0	0	1	0	0.67	-2.647	-4.76	-0.228	1.399	0.011215	-2	-4	-5	-5	-2	-4	-4	-5	-3	5	3	-5	2	-1	-3	-1	-2
2	0.009002	3	-5	-5	-5	-3	-4	-5	-4	-5	3	-1	-4	-2	-1	-4	-3	0	-5	-4	5	1	0	0	1	0	1.242	-1.262	-0.544	-1.337	-0.279	0.007419	-4	-5	-6	-6	-4	-5	-6	-6	-6	7	3	-5	0	-3	-5	-4	-3
2	0.006843	-4	-5	-5	-4	-6	-4	-4	-5	-5	-6	-6	-4	-5	-6	9	-4	-4	-6	-6	-5	0	0	1	1	0	0.421	-1.392	-1.628	0.189	2.081	0.007385	-3	-3	-3	-1	-6	0	8	-5	-3	-6	-6	-2	-5	-6	-3	-3	-4
2	0.1093	-3	-5	-3	-4	-6	-2	-5	7	-5	-7	-7	-4	-6	-6	-5	-3	-4	-6	-6	-6	0	0	1	1	0	1.045	2.064	1.33	-0.384	1.652	0.10163	-4	-4	1	8	-6	-3	0	-4	-4	-6	-7	-3	-6	-6	-4	-2	-2
2	0.071942	-4	-3	-3	2	-7	-1	7	-5	-3	-6	-6	-2	-5	-6	-4	-3	-2	-6	-5	-5	1	0	0	1	0	0.113	-0.837	1.477	1.357	-1.453	0.056164	3	-4	-4	-4	-1	1	-4	4	-4	1	-3	-4	-4	-5	-5	1	2
2	0.056164	3	-4	-4	-4	-1	1	-4	4	-4	1	-3	-4	-4	-5	-5	1	2	-6	-4	1	1	0	0	1	0	0.67	-2.647	-4.76	-0.228	1.399	0.048939	7	-4	-4	-5	0	-4	-4	-1	-5	-4	-4	-4	-4	-5	-4	0	-3
2	0.051984	-4	0	-3	-4	-6	-1	-2	-4	-4	-6	-5	8	-4	-6	-4	-3	-3	-6	-5	-5	0	1	0	1	0	-0.277	1.648	0.533	1.831	-0.561	0.049438	-3	-5	-3	-4	-5	-5	-5	7	-5	-7	-7	-4	-6	-6	-5	-3	-2
2	0.1521	5	-2	-3	-4	-4	-4	-4	3	-4	-5	-5	-3	-2	-5	-4	3	-2	-6	-5	-4	1	0	0	1	0	1.045	2.064	1.33	-0.384	1.652	0.13102	1	2	0	1	-5	0	0	3	-2	-5	-5	2	-3	-4	-4	3	-1
2	0.041912	-4	8	-3	-4	-6	-2	-2	-5	-3	-6	-5	1	-4	-6	-5	-3	-4	-5	-4	-5	0	0	1	1	0	0.44	2.897	1.502	1.538	-0.055	0.042531	1	-2	-1	1	-5	-1	2	-4	-3	-4	-4	0	-4	-6	6	-1	-1
2	0.038158	0	-3	-3	-1	-5	-3	-2	-1	-4	-3	-3	-2	-4	-5	7	-2	1	-4	-5	-2	0	0	1	1	0	0.421	-1.392	-1.628	0.189	2.081	0.035709	-2	-4	-4	-5	-4	1	-4	-5	-5	1	5	-4	1	-3	-2	-1	-1
2	0.54457	1	0	-1	-1	1	-1	-1	-2	3	-2	-1	-2	2	2	1	-2	-2	1	5	-3	0	0	1	1	0	-0.838	1.512	3.097	0.26	0.83	0.5096	0	-2	-1	2	-1	0	2	-1	2	-2	-2	-2	-1	-2	0	1	1
2	0.40602	1	-1	-3	-3	-5	-1	0	0	1	-2	-3	3	-3	-5	5	-1	-1	-6	-4	-1	0	0	1	0	1	0.421	-1.392	-1.628	0.189	2.081	0.40201	0	2	-2	-3	-5	0	1	-1	0	-4	-4	5	-4	-6	4	-2	-3
2	0.012754	0	-5	-3	-5	2	-5	-4	-1	-5	2	-2	-5	0	-2	0	-1	0	-5	-2	5	1	0	0	1	0	1.242	-1.262	-0.544	-1.337	-0.279	0.009575	-2	-2	-5	-6	-1	-4	-2	-5	-5	2	3	-5	4	3	-5	-3	0
2	0.030254	0	-3	-3	-2	1	0	3	1	-4	-3	-1	-3	1	-4	-4	3	1	-5	-4	-1	1	0	0	1	0	0.113	-0.837	1.477	1.357	-1.453	0.032147	0	-4	-4	-5	-1	-4	-4	-2	-5	3	3	-4	0	2	-4	-2	2
2	0.09674	-2	-4	-2	-4	-1	-4	-4	-2	-4	-1	-1	-4	3	2	-3	0	6	-4	-3	2	0	1	0	1	0	-1.005	1.212	2.219	-0.663	-1.524	0.09447	2	1	-3	-3	-3	0	0	-3	1	-2	-3	-3	0	-1	-3	0	3
2	0.10441	3	-4	-1	-4	-2	-2	-4	-1	-2	1	1	-4	0	1	-3	0	-1	5	-2	1	1	0	0	1	0	1.57	-0.146	-0.733	-0.591	-1.302	0.08036	3	1	-1	-4	-2	-1	-2	-4	-3	-1	2	2	-2	-3	-3	0	-2
2	0.034069	0	-3	-3	-4	3	-3	-3	0	-4	-2	1	-3	1	-2	-4	1	5	-3	-1	0	1	0	0	1	0	0.908	1.313	2.213	-0.032	0.326	0.033995	4	-3	-4	-4	3	-3	-4	0	-3	0	-1	-3	1	0	-3	-1	-1
2	0.38834	2	-5	-5	-4	0	-4	-1	-3	-5	2	0	-5	0	-2	-4	-3	0	-5	-3	5	0	1	0	1	0	0.393	0.816	2.131	-1.239	-0.547	0.33166	0	1	-1	0	-2	1	1	-4	-1	-1	0	0	3	1	-1	1	0
2	0.71078	-3	1	-2	-3	0	-2	-1	-3	0	1	-2	0	0	4	0	-1	-2	-3	5	0	0	1	0	0	1	-0.838	1.512	3.097	0.26	0.83	0.66742	-1	2	-1	-3	-3	2	0	-3	-1	2	0	1	2	-1	-4	0	2
2	0.37795	3	-1	-4	-5	1	-4	-3	-4	-4	1	-1	-3	-1	-3	-2	-3	-1	-6	-4	5	0	1	0	1	0	1.242	-1.262	-0.544	-1.337	-0.279	0.34298	1	1	0	-1	-3	0	0	-3	1	0	0	1	0	-3	-2	0	1
2	0.8454	-2	1	-3	-3	-4	1	0	-2	-1	2	-1	2	2	-2	-3	1	0	3	1	0	0	1	0	1	0	0.67	-2.647	-4.76	-0.228	1.399	0.79353	-2	-2	-4	-4	-3	-2	-2	-4	-2	4	2	-2	4	0	-3	0	0
2	0.47359	1	-3	-5	-5	2	-4	-3	-3	-2	2	-1	-4	0	1	-4	-2	-1	-5	-3	5	0	1	0	1	0	1.242	-1.262	-0.544	-1.337	-0.279	0.39249	0	1	-2	0	0	1	1	-4	-1	-2	0	0	0	0	1	0	1
2	0.16294	4	-5	-5	-4	3	-4	-5	-3	-5	0	0	-3	-1	-3	-2	-1	1	-5	-4	4	0	0	1	1	0	1.57	-0.146	-0.733	-0.591	-1.302	0.14909	-2	2	-1	-1	-2	2	1	-2	0	-3	-1	1	-2	2	-5	0	2
2	0.71771	-1	1	0	1	-1	0	0	0	0	0	-1	-1	-1	-1	3	0	0	0	0	0	0	0	1	0	1	0.421	-1.392	-1.628	0.189	2.081	0.72589	-1	3	0	0	-1	0	0	0	0	-1	0	0	-1	1	-1	0	-1
2	0.95036	-1	0	-2	0	-5	-1	2	-3	1	-1	0	-2	-4	-2	4	1	1	1	-2	-1	0	0	1	0	1	0.421	-1.392	-1.628	0.189	2.081	0.95664	0	1	-3	1	-5	1	0	-1	2	-2	-1	1	-1	-3	4	1	-1
2	0.93586	0	0	-1	-1	1	1	0	-1	1	-1	-2	0	0	-1	4	0	0	2	-4	0	0	0	1	0	1	0.421	-1.392	-1.628	0.189	2.081	0.93451	0	-2	-2	-1	-1	-1	1	0	-1	1	1	-2	-1	-1	2	0	1
2	0.25589	-2	-1	-5	-5	-4	-4	-1	-5	-4	3	2	-4	-2	3	0	-4	1	4	1	2	0	1	0	1	0	-0.397	0.412	1.891	-1.006	-0.59	0.25041	5	-4	-3	0	3	-3	-3	2	-4	-3	-4	-3	-3	-4	-4	1	-1
2	0	0	0	0	0	0	0	0	0	0	0	0	0	0	0	0	0	0	0	0	0	0	0	0	0	0	0	0	0	0	0	0	0	0	0	0	0	0	0	0	0	0	0	0	0	0	0	0	0
2	0.019892	2	-3	-2	-3	-3	-3	-3	6	-3	-4	-4	-3	-4	-4	-3	-1	-2	-4	-4	-3	1	0	0	1	0	1.045	2.064	1.33	-0.384	1.652	0.017814	0	-4	-4	-4	4	-3	-4	-4	-4	2	-1	-3	0	-2	-4	-1	0
2	0.10784	1	-3	-3	0	-4	-3	-1	-2	-3	-4	-1	-2	-3	-4	7	-1	-2	-4	-4	-3	0	0	1	0	1	0.421	-1.392	-1.628	0.189	2.081	0.11166	-3	-2	-1	-3	-4	-1	-2	-3	10	-4	-4	-2	-3	-2	-2	-2	-3
2	0.058993	-3	-2	-2	0	-6	0	7	-2	-2	-5	-5	-1	-4	-5	-3	-2	-3	-5	-4	-5	0	1	0	1	0	0.113	-0.837	1.477	1.357	-1.453	0.062754	-3	-5	-5	-5	-3	-5	-3	-6	-5	6	1	-5	-1	-2	-5	-4	-3
2	0.165	-1	-2	3	-1	-2	-2	0	4	0	-4	-3	0	-2	-4	-3	1	0	-4	-3	-3	0	0	1	0	1	1.045	2.064	1.33	-0.384	1.652	0.13091	0	2	0	-2	-4	-1	0	2	5	-2	-2	2	-2	-3	0	-1	-1
2	0.48845	0	-2	-3	-3	-4	1	-1	-2	-3	-4	-5	1	-4	-3	6	3	0	-5	-4	-4	0	0	1	0	1	0.67	-2.647	-4.76	-0.228	1.399	0.5008	-2	-4	-2	-2	-5	-2	4	6	-3	-6	-6	-3	-5	-5	-4	-2	-3
2	0.13088	-2	-3	-3	-3	-4	-2	-2	-3	-3	-4	-4	-2	-3	-4	8	0	0	-4	-4	-3	0	0	1	1	0	0.421	-1.392	-1.628	0.189	2.081	0.13555	-1	4	0	1	-4	0	0	-3	-1	-4	-4	3	-3	-4	3	0	-1
2	0.36716	1	2	1	2	-5	1	1	-2	-1	-6	-5	3	-5	-6	1	1	0	-6	-5	-5	0	0	1	0	1	-0.277	1.648	0.533	1.831	-0.561	0.38732	0	3	-1	1	-3	1	3	-1	-1	-5	-4	2	-5	-3	-1	0	0
2	0.089602	3	-1	-1	3	-5	1	4	-2	-4	-5	-5	2	-4	-6	-3	0	-1	-6	-5	-4	1	0	0	0	1	-0.259	-3.242	-3.656	1.05	0.302	0.08956	2	2	-1	0	-5	2	1	-3	-2	2	-1	2	0	-5	-4	-2	-1
2	0.58398	-1	-2	-2	-2	-2	-2	-2	-1	-2	5	1	-2	-1	-1	-2	-1	-1	-2	0	1	1	0	0	1	0	0.393	0.816	2.131	-1.239	-0.547	0.5775	-1	4	-1	-2	-2	-1	-2	1	2	-1	-1	1	-2	0	-2	-1	1
2	0	0	0	0	0	0	0	0	0	0	0	0	0	0	0	0	0	0	0	0	0	0	0	0	0	0	0	0	0	0	0	0	0	0	0	0	0	0	0	0	0	0	0	0	0	0	0	0	0
2	0.17766	-2	-2	-1	6	-5	-1	1	-2	2	-2	-4	-2	-4	-5	-4	-2	2	-5	-4	-2	1	0	0	1	0	-0.259	-3.242	-3.656	1.05	0.302	0.16566	-1	-5	-5	-5	-4	-4	-5	-3	-5	3	4	-3	0	-1	-5	-2	-2
2	0.18693	0	2	2	1	-4	2	4	-4	0	-2	-1	1	-2	-4	-4	-2	-2	-5	-4	-2	1	0	0	0	1	-0.259	-3.242	-3.656	1.05	0.302	0.21305	3	-2	-1	0	-3	-1	-2	-2	1	-4	-4	0	-3	-5	-3	5	-1
2	0.07363	-2	-4	-2	-3	-5	-4	-4	7	-4	-6	-6	-4	-5	-5	-4	-1	-4	-5	-5	-5	0	0	1	1	0	1.045	2.064	1.33	-0.384	1.652	0.089213	-2	-5	-5	-6	-1	-4	-5	-6	-5	3	2	-5	-1	-2	-5	-4	-2
2	0.3456	-1	-3	-1	-2	-1	-2	-2	-3	-3	-4	-4	-2	-3	-4	-3	6	4	-5	-4	-3	0	0	1	0	1	0.67	-2.647	-4.76	-0.228	1.399	0.30902	-3	-2	-2	0	-6	0	7	-4	-2	-5	-5	-1	-4	-5	-3	-2	-3
2	0.36712	-3	-4	-4	-4	-5	-3	-3	-4	-4	-5	-5	-3	-5	-6	9	-3	-3	-6	-5	-4	0	0	1	0	1	0.421	-1.392	-1.628	0.189	2.081	0.35532	-4	-2	-2	-3	-5	-1	-2	-4	10	-5	-4	-3	-4	-1	-4	-3	-3
2	0.084641	-1	3	-2	-2	1	0	2	-2	1	1	-1	1	-2	-1	-2	-1	0	-2	-1	1	0	1	0	1	0	0.44	2.897	1.502	1.538	-0.055	0.057509	-1	1	-1	1	-3	2	3	-3	1	-2	-3	0	-2	-3	-2	1	3
2	0.25095	1	0	1	2	-3	1	3	-1	1	-3	-2	1	-4	-3	0	0	0	-3	-2	-3	0	0	1	0	1	-0.277	1.648	0.533	1.831	-0.561	0.312	1	1	2	3	-3	-1	-1	-1	1	-3	0	0	-2	-2	-1	-1	1
2	0.05357	2	-2	-2	-5	2	-1	-4	0	2	-1	-1	-2	1	-1	3	-1	-1	2	1	0	0	1	0	1	0	1.57	-0.146	-0.733	-0.591	-1.302	0.054897	-2	-2	-2	-3	-1	-1	-5	-4	0	1	3	-5	2	1	-1	-1	-1
2	0.095129	-1	0	2	-4	-2	-1	-3	-3	3	1	1	-2	0	3	-4	-2	-1	4	2	1	0	0	1	1	0	1.266	-0.912	-1.505	-1.019	-0.987	0.088594	-2	1	-1	1	-3	-1	-1	-2	1	-2	-1	0	-3	0	5	-2	0
2	0.038381	3	-5	-4	-5	-5	-5	-5	6	-3	-5	-6	-4	-5	-6	-5	0	-4	-6	-6	-5	1	0	0	1	0	1.045	2.064	1.33	-0.384	1.652	0.040625	-2	-2	0	-4	-6	8	-1	-5	-1	-4	-3	-1	-1	-6	-5	-2	-3
2	0.13455	3	-2	-1	-4	2	-2	-3	0	3	1	1	-2	-1	0	-4	0	-2	-3	0	1	0	0	1	1	0	1.57	-0.146	-0.733	-0.591	-1.302	0.10901	-1	-3	0	-2	-3	-2	-3	4	-2	-4	-5	-2	-3	-5	6	1	-2
2	0.015406	-1	-5	-6	-6	-2	-5	-2	-5	-5	2	1	-5	0	3	-4	-4	-3	8	0	4	1	0	0	1	0	-0.397	0.412	1.891	-1.006	-0.59	0.01398	5	-5	-5	-5	-3	-4	-4	-3	-4	1	-1	-4	-3	5	-4	-2	-2
2	0.12911	-3	-3	-3	-3	-3	-3	-3	-4	7	3	0	-3	1	1	-3	-3	-2	-3	2	2	0	1	0	1	0	0.393	0.816	2.131	-1.239	-0.547	0.13692	-1	-3	-3	-1	-4	-3	-1	-3	-3	-4	-4	-2	-3	-4	8	-2	0
2	0	0	0	0	0	0	0	0	0	0	0	0	0	0	0	0	0	0	0	0	0	0	0	0	0	0	0	0	0	0	0	0	0	0	0	0	0	0	0	0	0	0	0	0	0	0	0	0	0
2	0.57629	1	-2	0	-2	-3	1	3	-1	-2	0	-2	-1	-2	-2	-3	2	2	-3	-2	0	0	0	1	0	1	0.113	-0.837	1.477	1.357	-1.453	0.52607	-3	-2	-1	-3	-4	-1	-2	-3	10	-4	-4	-2	-3	-3	-3	-2	-3
2	0.019508	4	-4	-4	-5	0	-4	-4	-4	-5	3	0	-4	-1	-3	-4	-2	-2	-5	-3	4	1	0	0	1	0	1.242	-1.262	-0.544	-1.337	-0.279	0.012084	2	-4	-5	-5	-3	-4	-5	-5	-5	4	3	-4	2	-2	-5	-3	-2
2	0.41873	2	-3	1	-3	1	0	-3	-3	-3	-1	-4	-3	-3	-4	5	3	-1	-5	-4	-2	1	0	0	1	0	0.421	-1.392	-1.628	0.189	2.081	0.33477	3	-4	-4	-5	-3	-4	-4	-2	-4	3	0	-4	5	-3	-4	0	0
2	0.44044	-2	0	-1	-2	-4	-1	-1	-3	-3	-4	-4	7	-3	-4	-2	-2	-3	-4	-4	-3	0	0	1	0	1	-0.277	1.648	0.533	1.831	-0.561	0.44576	0	-1	-3	-2	-3	-3	-2	-4	-3	4	0	-3	-1	-1	-2	-1	0
2	0.19202	-2	-1	-1	4	-1	0	6	-3	-1	-3	-4	-1	-4	-5	-3	-2	-1	-4	-4	-4	0	0	1	0	1	-0.259	-3.242	-3.656	1.05	0.302	0.15122	-2	1	3	-2	0	-3	-3	6	-1	-4	-4	-2	-4	1	-4	-2	-3
2	0.51878	4	2	-2	-3	-2	-1	-2	0	-3	-1	-1	-1	-2	-2	1	2	0	-4	-3	-2	1	0	0	1	0	1.57	-0.146	-0.733	-0.591	-1.302	0.53566	0	-1	-3	-3	6	-1	-3	-3	-3	0	2	-2	-1	-1	-3	2	1
2	0.10379	-1	-1	-4	-4	3	-2	-3	-4	-3	1	4	-3	3	1	0	-3	0	-4	0	0	0	0	1	1	0	1.266	-0.912	-1.505	-1.019	-0.987	0.06957	2	-4	-2	-4	3	-2	-3	-3	2	-1	-3	-4	-3	0	-3	0	1
2	0.72046	0	1	1	1	-4	1	1	0	-3	1	-1	1	-3	-4	-4	0	1	5	-4	-3	0	0	1	1	0	-0.259	-3.242	-3.656	1.05	0.302	0.75273	0	0	0	-1	1	-3	1	-2	5	0	-4	1	-4	0	-1	2	1
2	0.9318	-2	-3	2	6	-4	1	2	-2	-2	-3	-5	-2	-4	-5	-3	0	-1	-5	-4	-4	0	0	1	1	0	-0.259	-3.242	-3.656	1.05	0.302	0.93009	-2	-1	0	2	-4	-2	2	3	1	-3	-1	-2	-3	-4	-1	2	-2
2	0.51518	-4	-4	-5	-6	-2	-5	-5	-6	-5	5	3	-5	3	2	-4	-5	-3	-3	0	2	1	0	0	1	0	0.393	0.816	2.131	-1.239	-0.547	0.40142	1	0	0	3	-5	1	4	-3	-1	-4	-4	1	-3	-5	-2	0	-2
2	0.031542	-1	4	-2	-2	-3	5	2	-4	0	-2	-2	0	-2	-4	-4	-1	0	-5	-3	-2	1	0	0	0	1	-0.503	-1.853	-3.005	0.931	-0.179	0.028088	0	3	0	-1	-1	2	1	-3	-2	-1	0	3	2	-4	-4	-3	-3
2	0.009209	-2	3	-3	-3	-2	-1	-2	-4	4	-2	-4	0	-4	-2	-5	1	1	3	5	0	0	1	0	1	0	0.67	-2.647	-4.76	-0.228	1.399	0.009722	-2	-6	-6	-6	11	-6	-6	-6	-6	-4	-1	-6	-4	-5	-6	-4	-1
2	0.19837	-1	-1	0	4	0	-2	-3	-2	-2	-1	0	-2	0	2	-1	0	1	-5	-2	-3	0	0	1	0	1	1.266	-0.912	-1.505	-1.019	-0.987	0.20723	-1	1	2	0	2	0	1	2	3	-2	-3	0	-2	-3	-1	0	0
2	0.068008	0	-2	-1	1	-2	-2	1	6	0	-5	-5	-2	-3	-5	-4	-1	-2	0	-3	-5	0	0	1	1	0	1.045	2.064	1.33	-0.384	1.652	0.047044	-2	-1	0	6	-5	-2	0	-1	-2	-5	-4	1	-5	-4	3	0	-1
2	0.14503	-1	3	-1	2	-5	2	4	-3	2	-5	-3	3	-3	-5	-4	-1	-1	-4	-2	-5	1	0	0	0	1	-1.474	-0.078	-1.673	0.336	-0.417	0.18216	1	4	-3	-2	-2	1	3	-2	2	-2	0	1	0	-3	-4	-2	-3
2	0.97976	0	1	-3	-2	-4	-1	2	2	-3	-4	-4	0	-4	-4	4	1	0	4	-4	-1	0	0	1	0	1	0.113	-0.837	1.477	1.357	-1.453	0.9769	3	0	1	-3	2	0	0	-1	-3	-3	-3	0	2	0	1	1	1
2	0.77635	3	0	3	-2	2	0	-1	-2	0	-3	-1	1	-3	-4	-1	2	-1	-4	-4	-3	0	0	1	0	1	1.57	-0.146	-0.733	-0.591	-1.302	0.75816	0	-1	3	0	-4	0	2	4	-3	-3	-4	-2	-2	-4	-2	0	-1
2	0.27146	-2	-3	1	2	-5	-3	-2	6	-3	-5	-5	0	-5	-5	-4	0	0	-5	-5	-5	0	0	1	0	1	1.045	2.064	1.33	-0.384	1.652	0.26771	-2	4	0	0	-2	4	0	-4	1	-4	-3	4	0	-5	-4	0	-2
2	0.26573	-3	-1	-5	-5	-1	-4	-5	-5	-3	0	-2	-4	-2	4	-5	-4	-4	10	5	-1	0	0	1	1	0	-2.128	-0.184	0.672	-0.595	0.009	0.24992	-1	-3	-2	-3	1	-2	-2	-4	10	-5	-4	-3	-1	-3	-4	-3	-4
2	0.34313	2	-2	1	-2	0	0	-3	4	-4	-1	-3	-2	-4	-4	1	3	0	-5	-5	-4	0	0	1	0	1	1.045	2.064	1.33	-0.384	1.652	0.3489	-4	0	-4	-5	-2	0	-4	-5	0	-3	-1	-3	-3	7	0	-2	-4
2	0.030584	-5	-1	-5	-6	-5	-4	-5	-5	-3	-4	-4	-5	-3	3	-6	-5	-4	11	5	-4	0	0	1	1	0	-2.128	-0.184	0.672	-0.595	0.009	0.019799	-4	-3	-2	-3	-5	-2	-2	-4	10	-5	-5	-3	-4	-4	-4	-3	-4
2	0.069415	-3	0	2	0	-1	-1	3	-1	5	-2	-2	0	-1	1	-5	0	-3	-4	3	-2	1	0	0	0	1	-0.838	1.512	3.097	0.26	0.83	0.07994	0	3	2	1	-4	3	2	-4	0	-4	-4	3	-4	-5	-3	0	-1
2	0.16217	-1	-1	0	-3	0	0	3	-4	-3	-3	-4	0	-2	-5	-4	4	2	-5	-4	1	0	1	0	0	1	0.113	-0.837	1.477	1.357	-1.453	0.13714	6	-4	-4	-5	1	-4	-4	-3	1	-2	-3	-4	-3	2	-4	-1	-2
2	0.098603	-5	-1	-6	-7	-5	-5	-5	-5	-4	-5	-4	-5	-4	3	-6	-5	-5	12	3	-5	0	0	1	1	0	-2.128	-0.184	0.672	-0.595	0.009	0.10687	-4	-3	-2	-4	5	-2	-3	-5	10	-6	-5	-4	-4	-4	-5	-4	-4
2	0.10687	-4	-3	-2	-4	5	-2	-3	-5	10	-6	-5	-4	-4	-4	-5	-4	-4	-5	-1	-6	0	0	1	1	0	-1.474	-0.078	-1.673	0.336	-0.417	0.12423	-1	0	0	2	-5	-1	1	-4	-1	-3	-3	-1	0	-5	5	0	-2
2	0.2468	-2	-1	-2	-1	-5	-2	-3	-1	10	-6	-5	-3	-4	-4	-5	-3	-4	-5	-1	-6	1	0	0	1	0	-1.474	-0.078	-1.673	0.336	-0.417	0.2443	0	-3	-2	-4	-4	1	-3	-4	-4	2	4	2	0	-3	-4	-3	-3
2	0.97288	2	-1	0	-3	-4	5	-1	-1	-3	-4	-4	-1	-4	-4	1	1	-1	-4	1	-2	0	0	1	0	1	-0.503	-1.853	-3.005	0.931	-0.179	0.97172	0	-4	-2	-2	-4	0	-2	0	0	-4	-4	-2	0	-2	6	0	2
2	0.96676	0	2	0	-3	-4	2	-2	-3	-3	-4	-4	4	0	-4	-1	3	-1	-4	0	-1	0	0	1	0	1	-0.277	1.648	0.533	1.831	-0.561	0.96369	0	1	-1	-2	-5	3	-1	-2	0	-4	-5	0	-4	-4	6	-1	0
2	0.95797	1	-2	-1	-1	-3	-2	0	0	1	1	-3	1	-3	-4	2	3	0	-4	-3	-2	0	0	1	0	1	0.67	-2.647	-4.76	-0.228	1.399	0.95098	0	-2	-3	-1	-4	-2	2	-4	-1	-2	2	-2	-1	-3	4	1	-1
2	0.93527	-2	-1	-1	-3	-3	1	-2	5	2	-3	-4	-1	-3	-4	-1	0	1	-4	-3	-1	0	0	1	0	1	1.045	2.064	1.33	-0.384	1.652	0.92698	2	-2	-1	-3	-3	-3	-1	-2	-3	-2	0	-3	-2	2	2	0	4
2	0.90334	0	0	5	-2	-3	2	-1	-3	-2	-1	-1	-2	-3	-4	-3	2	2	-4	-3	-2	0	0	1	0	1	-0.503	-1.853	-3.005	0.931	-0.179	0.89023	-1	-3	-4	-4	-3	-3	-3	-4	3	-1	2	-3	3	0	3	-3	-3
2	0	0	0	0	0	0	0	0	0	0	0	0	0	0	0	0	0	0	0	0	0	0	0	0	0	0	0	0	0	0	0	0	0	0	0	0	0	0	0	0	0	0	0	0	0	0	0	0	0
2	0.33499	-1	-3	0	-2	-3	-3	-3	6	-1	0	-3	-2	-3	-4	-3	0	-2	-4	-4	-2	0	0	1	1	0	1.045	2.064	1.33	-0.384	1.652	0.28542	-2	2	-1	-2	-4	0	0	-3	-2	-4	-3	6	-2	-4	-2	-1	-2
2	0.23582	-1	-3	-3	-4	-2	-3	-3	-4	-4	2	1	-3	1	-2	-3	0	0	-4	-2	4	0	1	0	1	0	1.242	-1.262	-0.544	-1.337	-0.279	0.17867	-2	-3	-4	-4	-2	-3	-3	-4	-4	5	1	-3	2	-1	2	-3	0
2	0.27982	0	-2	0	-1	-3	-1	1	-2	-3	1	-2	2	4	-3	-3	0	2	-4	-2	1	1	0	0	0	1	1.242	-1.262	-0.544	-1.337	-0.279	0.30572	0	-3	-1	-2	-3	1	-3	-3	-3	2	2	-1	0	0	-3	-2	0
2	0.19502	1	-4	-3	0	-3	-2	0	0	-4	1	-1	-3	1	-2	3	-2	2	-4	-2	2	0	0	1	1	0	1.242	-1.262	-0.544	-1.337	-0.279	0.18471	-1	-1	3	2	-4	0	4	-1	0	-4	-4	-2	-1	-5	1	0	1
2	0.16454	-2	-4	-5	-5	-4	-4	-5	-4	-3	-2	-2	-4	0	7	-5	-4	-4	7	2	-3	1	0	0	1	0	-0.397	0.412	1.891	-1.006	-0.59	0.18184	-1	-1	-2	2	-4	5	4	-3	-2	-4	-1	2	-3	-4	-3	0	-2
2	0.88775	-1	-1	-4	-2	-1	0	0	0	0	2	-1	-2	1	-1	-4	0	0	4	0	3	0	1	0	1	0	1.242	-1.262	-0.544	-1.337	-0.279	0.88533	-1	-2	-1	-4	0	-1	-3	-3	-4	5	2	-4	1	-1	0	1	-2
2	0.83196	1	-1	-2	-2	-2	1	-2	2	-2	-1	2	0	0	-2	-2	0	1	-2	-2	-1	0	0	1	1	0	1.266	-0.912	-1.505	-1.019	-0.987	0.83411	-1	3	-2	-2	-3	1	-2	2	0	-2	-3	-1	-2	-3	4	0	-2
2	0.92238	3	-3	0	-2	-3	0	-2	1	2	0	-2	-2	-2	-3	0	2	-1	-4	-1	0	0	0	1	0	1	1.57	-0.146	-0.733	-0.591	-1.302	0.92811	-2	-2	-1	4	-4	4	1	-2	3	1	-3	-2	-3	-4	0	0	-2
2	0.075491	-3	-4	-5	-5	-3	0	-5	-6	-5	4	5	-4	2	-2	-5	-4	-3	-4	-3	0	1	0	0	1	0	1.266	-0.912	-1.505	-1.019	-0.987	0.062322	-3	-3	4	1	5	-3	-3	-4	3	-4	-2	-3	-3	-1	-4	-2	2
2	0.060699	-3	-3	-1	-4	-4	-3	-4	-4	0	-3	-2	-3	1	1	-4	-3	-3	0	9	-3	0	1	0	1	0	-0.838	1.512	3.097	0.26	0.83	0.058481	-2	1	-3	-4	-3	-2	-3	-4	-3	4	-1	2	6	-2	-3	-3	0
2	0.40492	0	-3	-1	-1	-1	0	0	-3	-3	-1	-3	-1	-3	-4	7	0	-2	-4	-4	-3	0	0	1	0	1	0.421	-1.392	-1.628	0.189	2.081	0.39202	-1	0	5	1	-4	0	-2	1	-2	-4	-4	0	-3	-4	1	1	-1
2	0.4428	0	-1	1	0	-1	0	-1	-2	1	-3	-2	3	-2	-2	-3	3	3	-4	-2	-2	1	0	0	0	1	0.67	-2.647	-4.76	-0.228	1.399	0.44704	-2	0	0	0	6	0	3	-1	-2	-3	-3	3	-2	-3	-2	0	-1
2	0.52682	1	-3	1	0	-3	-2	-3	4	-3	-4	-3	-1	-3	-4	-3	3	1	-4	-4	-3	0	0	1	0	1	1.045	2.064	1.33	-0.384	1.652	0.55921	-3	1	-4	-5	-3	-3	-4	-5	-4	3	3	-3	2	-2	-4	-3	-3
2	0.88419	0	-3	2	3	-5	2	3	-3	3	-5	-3	1	-2	-5	-3	0	-1	-5	-1	-4	0	0	1	0	1	0.113	-0.837	1.477	1.357	-1.453	0.89626	0	2	-1	2	1	3	-1	-1	-1	2	-3	1	-3	-4	-1	2	-1
2	0.51938	-2	-5	-5	-5	11	-5	-6	-5	-5	-2	-3	-5	-4	-5	-5	-2	2	-5	-5	-3	1	0	0	1	0	-1.02	-0.255	-0.862	-1.343	0.465	0.52678	-4	-5	0	-5	-1	-5	-5	-6	-4	-1	4	-5	-1	6	-6	-4	-3
2	0.43789	-1	-2	-1	-2	-2	-2	-2	-2	-3	-2	-2	-2	-2	-3	-2	1	7	-3	-3	-1	1	0	0	1	0	0.908	1.313	2.213	-0.032	0.326	0.3817	-2	-3	-2	-2	-3	-2	-2	-3	-3	-2	-3	-2	-2	-3	6	-1	4
2	0.0309	-4	-5	-5	-6	-3	-4	-5	-6	-1	-3	-3	-5	-3	7	-6	-4	-4	0	8	-3	0	1	0	1	0	-0.838	1.512	3.097	0.26	0.83	0.030513	-2	-3	-4	-4	0	-4	-4	-3	4	-3	-3	-4	-3	7	-5	-2	-1
2	0.12508	0	-2	2	0	-3	-2	0	-2	2	-4	-4	-1	-4	-5	-4	4	3	-5	-2	-4	1	0	0	0	1	0.67	-2.647	-4.76	-0.228	1.399	0.12939	-4	-5	-6	-6	-4	-3	-5	-6	-5	2	6	-5	3	-1	-5	-5	-3
2	0.079054	-1	-3	-1	-2	-3	-3	-3	-4	0	0	-2	-3	-2	4	-4	-3	-3	4	7	0	0	0	1	1	0	-0.397	0.412	1.891	-1.006	-0.59	0.075396	3	2	-1	-3	0	0	-2	-2	0	-2	-2	2	-2	-3	-3	0	-1
2	0.091541	0	-2	-3	-2	-3	-1	1	1	-2	0	2	-2	2	-2	2	-2	-1	-4	-1	1	0	0	1	1	0	1.266	-0.912	-1.505	-1.019	-0.987	0.058979	-2	-1	0	5	-5	-1	3	-3	-2	-5	-5	4	-4	-5	-1	0	-1
2	0.071368	2	0	-1	2	-5	3	2	-3	-2	-5	-3	3	-2	-5	-4	0	-1	-5	-4	-4	1	0	0	0	1	-0.259	-3.242	-3.656	1.05	0.302	0.056147	3	-4	-2	-5	-2	-2	-4	-4	-5	1	4	-4	0	2	-5	-1	-3
2	0.36787	0	1	0	1	-5	0	2	2	-1	-3	-4	3	-4	-4	-3	0	1	-5	-1	-3	1	0	0	0	1	-0.277	1.648	0.533	1.831	-0.561	0.35143	-1	-2	3	4	-5	0	4	-2	3	-5	-5	-1	-4	-5	-4	0	0
2	0.63676	-1	0	0	3	-3	-1	3	-2	-2	-3	-2	2	-2	-3	1	0	1	-3	-3	-2	1	0	0	0	1	-0.277	1.648	0.533	1.831	-0.561	0.58249	1	-1	1	1	-2	0	3	-1	-1	-2	-1	0	-2	-2	-1	0	0
2	0.075814	-4	1	-5	-5	-3	-2	-4	-6	1	1	1	1	0	6	-5	-4	-4	-3	3	0	0	1	0	1	0	-0.397	0.412	1.891	-1.006	-0.59	0.068772	-4	-5	-6	-6	-4	-5	-5	-6	-5	5	0	-5	-1	6	-6	-5	-4
2	0.18979	-1	-1	4	-3	-2	6	-1	-4	0	-5	-5	2	-4	-6	-4	1	-3	-5	-4	-5	1	0	0	0	1	-0.169	0.933	1.299	0.945	0.828	0.22209	4	-4	-4	-4	-1	2	-3	-3	-4	0	-3	-3	-2	-5	-4	2	1
2	0.3724	-4	1	0	2	-5	2	2	0	3	-1	-1	0	0	-5	0	-1	-1	-5	-4	-1	0	0	1	0	1	-1.474	-0.078	-1.673	0.336	-0.417	0.28443	0	-1	-3	1	-5	1	0	0	4	0	-2	0	2	-4	1	-1	0
2	0.20318	0	1	1	1	-4	1	1	0	3	-4	-1	1	-3	-4	1	0	1	-5	-4	-4	0	0	1	0	1	0.421	-1.392	-1.628	0.189	2.081	0.14641	-3	-1	-1	0	0	3	2	-4	0	0	-2	3	-3	2	-1	-1	-1
2	0.20682	-2	-2	-3	-5	-5	-2	-1	-5	-2	2	3	3	-1	-3	-5	-3	0	-4	4	0	1	0	0	1	0	1.266	-0.912	-1.505	-1.019	-0.987	0.21738	6	-4	0	-4	3	-4	-4	-2	-4	-3	-4	-4	-3	-4	-4	0	-2
2	0.10918	-2	3	4	3	-4	1	-1	-4	2	-5	-5	3	-4	-4	-4	-1	-3	-5	-2	-2	0	0	1	0	1	-0.277	1.648	0.533	1.831	-0.561	0.10948	-2	-4	-3	-1	-5	1	2	-1	-3	-5	-5	-2	-5	-6	7	1	-3
2	0.83962	-2	-3	-4	-5	-2	-3	-4	-5	-4	2	4	-3	6	-1	-4	-3	-2	-3	-2	0	1	0	0	1	0	1.266	-0.912	-1.505	-1.019	-0.987	0.83749	-1	1	-1	-2	-3	2	-1	1	3	-1	-3	-1	-2	-3	-3	4	-1
2	0.32133	-1	2	-2	1	-5	0	4	-5	2	-1	-2	2	-3	-4	-3	-1	-1	-6	-4	2	0	1	0	0	1	0.113	-0.837	1.477	1.357	-1.453	0.2508	-2	-4	-3	-3	-2	-3	-3	-2	-4	-3	-2	-1	-3	-4	-4	-1	7
2	0.1043	-2	-5	-2	-2	-5	-3	-3	7	-3	-3	-6	-4	-5	-4	-5	-2	-4	-5	-5	-3	0	1	0	1	0	1.045	2.064	1.33	-0.384	1.652	0.077043	-2	1	-1	2	-3	0	1	-3	0	-1	-4	-2	-2	-1	-2	1	4
2	0.17036	3	-3	-4	-1	-2	-3	-4	-4	2	1	-2	-4	2	-1	0	2	1	4	-3	2	0	0	1	1	0	1.57	-0.146	-0.733	-0.591	-1.302	0.13792	-1	-1	-1	0	-5	1	-1	-2	-2	-4	-4	-2	-4	-4	7	-2	-2
2	0.076858	-1	0	5	-1	2	-2	0	-2	-2	0	-1	-1	-1	-1	-1	2	-1	-3	-3	-1	0	0	1	1	0	-0.169	0.933	1.299	0.945	0.828	0.086489	1	-3	-2	-1	-1	-2	-3	4	-4	-2	-4	-3	1	-4	-3	3	1
2	0.056758	-1	-4	-3	-3	-4	-3	-2	7	-4	-5	-5	-3	-4	-5	-4	-1	-3	-4	-4	-4	0	1	0	1	0	1.045	2.064	1.33	-0.384	1.652	0.055065	-3	-4	-4	-5	-1	-4	-4	-4	-3	-2	-2	-4	-3	5	-5	-4	-4
2	0.11063	2	-5	-5	-5	-3	-5	-5	-5	-5	2	-2	-5	-2	-3	-5	-3	1	-5	-3	6	0	1	0	1	0	1.242	-1.262	-0.544	-1.337	-0.279	0.090141	-1	-5	-6	-6	0	-5	-5	-6	-6	1	0	-5	-2	-3	-5	-4	-2
2	0.28044	-3	-3	4	2	-3	-3	-3	-2	2	-4	-5	-3	-4	-4	-4	2	5	3	-3	-4	0	0	1	1	0	0.67	-2.647	-4.76	-0.228	1.399	0.24421	0	-5	-5	-4	-5	-3	-4	-4	-5	-3	-1	-4	-2	-5	8	-3	-3
2	0.263	-1	4	-3	-1	-3	1	-2	-3	-1	-3	-2	5	-1	-3	-3	-1	-3	-5	-4	-2	1	0	0	0	1	0.44	2.897	1.502	1.538	-0.055	0.22011	3	-1	-1	2	-5	3	4	-1	-3	-4	-3	0	-4	-5	-2	0	-1
2	0.023388	-3	-2	-3	-2	-3	-2	1	-5	-2	1	-2	2	-3	-4	-4	-2	5	-5	-4	3	0	1	0	1	0	1.242	-1.262	-0.544	-1.337	-0.279	0.017415	-3	8	-3	-4	-4	1	-3	-5	1	-5	-4	1	-3	-5	-5	-3	-4
2	0.058404	5	-1	-4	-4	-2	-2	1	-3	-4	-2	-1	2	-3	-2	-2	-2	-2	-5	1	-2	1	0	0	1	0	1.57	-0.146	-0.733	-0.591	-1.302	0.058545	6	-4	-4	-4	-3	-4	-4	2	-4	-4	-4	-4	-4	-5	-4	-2	-3
2	0.52481	-2	-3	1	4	-2	-1	3	0	-2	-1	-4	-1	-1	-2	-3	0	1	-4	-4	-1	1	0	0	0	1	-0.259	-3.242	-3.656	1.05	0.302	0.49646	-2	-3	-1	-2	-1	-3	-2	-1	-4	2	4	-3	2	-2	0	-3	-1
2	0.3417	-2	-1	1	5	-4	-2	-1	3	-3	-4	-4	-2	-3	-5	-3	1	3	-5	-4	-4	0	0	1	0	1	-0.259	-3.242	-3.656	1.05	0.302	0.33781	-2	2	-1	-3	-3	1	-2	-3	0	-3	-2	4	1	2	-2	1	-1
2	0.80502	0	-1	-2	1	-3	0	-1	-3	5	-1	-1	-2	-2	5	1	-2	-1	-2	0	-2	0	0	1	0	1	-1.474	-0.078	-1.673	0.336	-0.417	0.79715	-1	-3	0	2	-4	-1	3	0	0	-4	-3	-2	-1	1	-2	2	2
2	0.1322	-1	-5	-3	-4	-4	-4	-5	7	-5	-6	-6	-4	-5	-6	-5	-3	-3	-5	-6	-6	0	1	0	1	0	1.045	2.064	1.33	-0.384	1.652	0.10688	-2	1	0	0	-5	2	2	-3	-1	-4	-3	1	-2	-4	-4	0	4
2	0.33953	-2	2	0	2	0	0	1	-3	3	-1	-1	0	0	-1	1	-1	1	-2	-3	-1	0	1	0	0	1	0.908	1.313	2.213	-0.032	0.326	0.27501	-3	3	-2	-1	-5	0	0	-2	3	-1	-2	0	-1	1	-1	-1	-1
2	0.93331	0	2	0	-1	-6	2	2	-3	-2	-3	-4	5	-4	-6	-4	-1	-1	-6	-5	-3	1	0	0	0	1	-0.277	1.648	0.533	1.831	-0.561	0.93087	-1	3	-2	-1	-6	2	1	-5	-1	-5	-2	5	-4	-5	-4	-2	0
2	0.92224	1	0	0	-1	-5	1	1	-3	0	0	-1	3	3	-4	-4	1	0	-3	-3	0	1	0	0	0	1	-1.005	1.212	2.219	-0.663	-1.524	0.9243	0	0	-1	0	-5	4	3	-2	1	-3	-3	3	-4	-6	-4	0	-2
2	0.96424	2	-1	0	0	0	2	2	-2	-4	-2	1	3	-1	-5	-4	-1	-3	-5	-4	-2	1	0	0	0	1	1.57	-0.146	-0.733	-0.591	-1.302	0.96321	-2	-2	2	1	-6	2	5	-4	-3	-4	0	-1	-4	-5	-4	-1	-1
2	0.4461	-1	-2	-2	-2	-2	-2	-2	-2	-2	-1	1	-2	-1	-2	6	-1	-1	-3	-2	1	0	0	1	0	1	0.421	-1.392	-1.628	0.189	2.081	0.41186	-1	-2	-1	4	-3	-1	0	-2	-2	-3	-3	-1	-2	-3	6	-1	-1
2	0.079484	1	-3	-4	-4	-2	-3	-3	-4	-4	1	1	-3	0	2	-3	-2	-1	-3	-1	5	0	1	0	1	0	1.242	-1.262	-0.544	-1.337	-0.279	0.061116	-1	-2	-1	-2	-2	-2	-2	-2	-3	-2	-2	-2	-2	-3	-2	2	6
2	0.41194	-2	-1	-1	1	-4	1	6	-3	-1	-4	-3	0	-3	-4	-2	-1	-2	-3	-3	-3	1	0	0	0	1	0.113	-0.837	1.477	1.357	-1.453	0.39038	2	-2	0	5	-3	-1	0	-2	-2	-3	-3	-1	-3	-3	-2	0	1
2	0.11017	5	-4	-3	-4	1	-3	-3	1	-4	-2	-2	-3	0	-4	-3	2	-1	-5	-4	1	0	0	1	1	0	1.57	-0.146	-0.733	-0.591	-1.302	0.1082	-2	-1	5	-2	-3	-2	-3	-2	-3	-4	-4	-2	-3	-5	-3	2	5
2	0.089565	-2	-4	-2	2	-4	-3	1	0	-4	0	3	-3	-2	-1	-4	-3	-3	-4	-3	4	0	1	0	1	0	1.242	-1.262	-0.544	-1.337	-0.279	0.083826	-1	-4	-3	-5	6	-4	-4	-4	-4	-1	2	-4	1	3	-4	-1	-3
2	0.99826	-1	-1	-1	0	-2	0	5	-2	-1	-2	-2	-1	-2	-2	1	-1	0	-2	1	-2	0	0	1	0	1	0.113	-0.837	1.477	1.357	-1.453	0.99811	0	-2	-2	-2	-2	1	-1	-2	-2	-2	-2	-1	-2	-2	6	-1	-1
2	0.9633	1	-2	-2	-2	-3	0	1	5	-2	-3	-3	-2	-2	1	-2	-1	-2	-3	-2	-1	0	0	1	0	1	1.045	2.064	1.33	-0.384	1.652	0.95999	0	-2	-1	1	-2	-1	-1	0	-2	-2	-2	-2	2	-2	3	1	4
2	0.99554	-2	-1	-2	0	2	5	-1	1	2	1	0	-1	-1	-3	1	-2	-2	-3	-2	-2	1	0	0	0	1	-0.503	-1.853	-3.005	0.931	-0.179	0.99538	-1	1	-1	-1	-2	0	-1	-2	-1	-2	-2	4	-2	-3	2	2	-1
2	0.83724	-2	-1	-1	0	-4	3	5	-3	0	-3	-3	0	-2	-1	-2	-1	-2	-1	3	-3	0	0	1	0	1	0.113	-0.837	1.477	1.357	-1.453	0.84184	2	-1	-2	-1	-2	2	2	-2	-2	0	-1	-1	-1	-3	-2	-1	-1
2	0.95897	0	-1	0	-1	-2	-1	-1	5	-1	-2	-2	-1	-1	-2	-1	0	-1	-1	-2	-2	0	0	1	0	1	1.045	2.064	1.33	-0.384	1.652	0.95927	1	-1	-1	-1	-1	-1	0	-1	-2	0	1	-1	0	-1	-1	0	2
2	0.28871	-3	-4	-2	-4	-4	-4	-4	-4	-3	0	0	-4	2	7	-4	-4	-3	-2	3	-2	0	0	1	1	0	-0.397	0.412	1.891	-1.006	-0.59	0.31249	-3	5	-2	-3	-1	1	-2	-3	3	-2	-3	2	-1	0	-3	-1	1
2	0.39587	2	-1	-1	0	-4	0	5	1	-2	-2	-3	0	-3	-4	-3	-1	-1	-4	-3	-2	1	0	0	1	0	0.113	-0.837	1.477	1.357	-1.453	0.35242	3	-1	4	-1	-4	-1	-2	-1	-2	-2	-2	0	-3	-2	-4	0	2
2	0.053196	-1	-1	-1	0	-5	-1	-1	-3	-3	-5	-5	2	-4	-5	7	-2	-3	-5	-5	-4	0	0	1	0	1	0.421	-1.392	-1.628	0.189	2.081	0.051012	0	-2	-5	-5	-3	-2	-4	-5	-4	4	2	-4	0	-2	-5	-4	-2
2	0	0	0	0	0	0	0	0	0	0	0	0	0	0	0	0	0	0	0	0	0	0	0	0	0	0	0	0	0	0	0	0	0	0	0	0	0	0	0	0	0	0	0	0	0	0	0	0	0
2	0.13332	-1	1	-1	-2	-5	2	-1	-1	-2	-4	-4	6	-4	-6	3	-1	-2	-6	-5	-3	1	0	0	0	1	-0.503	-1.853	-3.005	0.931	-0.179	0.11125	0	-3	-3	3	-6	0	6	-3	-3	-5	-4	-1	-5	-6	2	0	-2
2	0.22723	1	-5	-5	-6	-1	-5	-5	-5	-1	-1	2	-5	2	6	-5	-4	-4	2	2	1	1	0	0	1	0	-1.005	1.212	2.219	-0.663	-1.524	0.17896	-2	5	0	-3	-5	0	-1	-4	-3	-4	-1	5	-3	-5	-4	-2	-1
2	0.005289	0	-3	-3	-2	-2	1	4	-1	-3	3	-1	-3	2	-1	-4	1	-1	-5	-4	-1	1	0	0	1	0	0.67	-2.647	-4.76	-0.228	1.399	0.005449	-4	-5	-4	-6	-2	-4	-5	-5	-3	-3	-3	-5	-3	3	-6	-5	-4
2	0.062222	1	-2	5	-1	-1	5	-1	-2	1	-5	-3	-2	-3	-5	-4	1	-2	-6	-5	-4	1	0	0	1	0	-0.169	0.933	1.299	0.945	0.828	0.080125	1	-1	3	-3	-2	1	0	-2	1	-2	-3	-2	3	-3	-5	1	3
2	0.36935	-5	-5	-1	-4	-3	-5	-6	-5	-1	-1	3	-6	-2	6	-4	-3	-4	0	5	-1	1	0	0	1	0	1.266	-0.912	-1.505	-1.019	-0.987	0.2819	1	1	-2	-2	-4	6	-2	-5	1	-3	1	-1	-3	-2	-3	-1	1
2	0.029634	-4	-4	1	7	-6	-1	1	-1	0	-4	-4	-2	-6	-6	-5	-2	-2	-7	-3	-3	0	0	1	0	1	-0.259	-3.242	-3.656	1.05	0.302	0.031284	1	-3	-3	-2	2	0	-3	-1	-3	-2	-3	-3	-4	-4	0	2	5
2	0.088983	4	1	1	-1	-5	1	0	-1	-3	-5	-3	1	-2	-6	-4	2	-1	-6	-4	-4	1	0	0	0	1	0.113	-0.837	1.477	1.357	-1.453	0.068895	-3	-6	-6	-6	-3	-3	-6	-6	-6	4	1	-5	-1	-3	-6	-5	-2
2	0	0	0	0	0	0	0	0	0	0	0	0	0	0	0	0	0	0	0	0	0	0	0	0	0	0	0	0	0	0	0	0	0	0	0	0	0	0	0	0	0	0	0	0	0	0	0	0	0
2	0.2021	-1	-3	-2	-3	0	-3	-3	-1	-2	0	4	-2	1	0	-3	-2	-2	-3	1	2	0	0	1	1	0	1.266	-0.912	-1.505	-1.019	-0.987	0.25442	-2	-3	4	-1	-3	-2	-3	6	-2	-3	-3	-2	-4	-3	-4	-1	-3
2	0.42897	1	-4	-1	-3	1	-1	-2	-3	-4	-3	-3	-3	-4	-5	5	4	3	-5	-2	-3	0	0	1	1	0	0.67	-2.647	-4.76	-0.228	1.399	0.42639	1	1	2	0	-3	0	-1	-2	-3	-3	-4	3	-4	-5	3	1	1
2	0.36463	0	1	1	3	-3	1	4	-3	-1	-2	-3	2	-4	-3	-4	-1	-2	-5	-3	-2	1	0	0	0	1	-0.277	1.648	0.533	1.831	-0.561	0.2766	1	0	1	1	-4	2	3	-3	3	-4	-3	2	-3	-4	-4	-1	-1
2	0.31818	0	-2	1	1	-3	2	1	-2	-1	-3	-2	1	-2	-4	-3	1	3	-5	-4	-1	0	0	1	0	1	-0.259	-3.242	-3.656	1.05	0.302	0.32555	-2	-3	1	3	-5	-1	4	-3	6	-5	-4	-2	-4	-5	-4	0	-1
2	0.041337	-2	0	-5	-5	-3	-3	-4	-5	-3	1	-1	0	0	-1	-5	-2	-2	8	2	4	0	1	0	1	0	-2.128	-0.184	0.672	-0.595	0.009	0.052416	-4	-4	-1	8	-6	-2	1	-2	-3	-5	-6	-3	-5	-6	-4	-2	-3
2	0.057442	5	-4	-3	-4	-3	-3	-3	4	-4	-4	-4	-3	-4	-5	-3	-1	-3	-5	-4	-3	1	0	0	1	0	1.045	2.064	1.33	-0.384	1.652	0.05899	-1	0	-2	-2	-4	5	4	-4	5	-5	-3	-1	0	-4	-4	-2	-3
2	0.3456	-3	2	-4	-5	-3	-3	-2	-5	-3	4	3	1	0	-2	-5	-4	-3	-4	-3	2	1	0	0	1	0	1.266	-0.912	-1.505	-1.019	-0.987	0.3256	2	1	-1	2	-5	2	4	-3	-3	-5	-4	3	-4	-5	-3	-1	-2
2	0.35624	-2	-4	-4	-2	-4	-3	-2	-2	-4	1	-1	-3	-3	-4	7	-2	-2	-5	-4	2	0	0	1	0	1	1.242	-1.262	-0.544	-1.337	-0.279	0.3593	1	-2	0	2	-4	1	4	0	-2	-5	-5	0	-4	-5	0	0	0
2	0.094484	0	3	0	-3	4	0	-1	4	-2	-5	-5	-1	-4	-5	-4	0	0	-5	-4	-4	0	1	0	1	0	0.44	2.897	1.502	1.538	-0.055	0.10915	-4	-5	-5	-6	-4	-5	-5	-5	-3	-2	-1	-5	3	8	-6	-4	-4
2	0.54951	2	-2	0	-3	-3	0	-2	1	-3	-4	-3	3	-3	0	-1	3	0	-4	0	-3	1	0	0	1	0	1.57	-0.146	-0.733	-0.591	-1.302	0.45404	0	-2	-4	-4	1	-3	-4	-4	-4	3	1	-2	-1	-1	-1	1	0
2	0.26879	-1	-1	1	5	-5	0	3	-1	-1	-3	-4	0	-5	-3	-2	1	0	-1	-5	-3	1	0	0	0	1	-0.259	-3.242	-3.656	1.05	0.302	0.25647	2	-2	0	2	-4	0	2	-1	-1	-1	-1	1	-1	-1	-1	1	-2
2	0.49285	-3	-1	-1	-4	-2	-1	-2	-5	-1	2	4	-1	1	-2	2	-3	-2	-3	-1	0	0	0	1	0	1	1.266	-0.912	-1.505	-1.019	-0.987	0.41419	-1	-3	0	-1	-4	-2	-3	0	-3	-4	-5	-1	-4	-5	2	4	4
2	0.11057	-1	-5	-3	-4	-5	-5	-5	7	-5	-7	-7	-4	-6	-6	-5	-2	-4	-5	-6	-6	1	0	0	1	0	1.045	2.064	1.33	-0.384	1.652	0.087073	1	-4	-3	-4	1	-4	-4	6	-5	-4	-3	-4	-3	-5	-5	2	-1
2	0.024764	0	-5	-5	-6	-4	-5	-5	-4	-5	4	4	-5	-1	-3	0	-4	-1	-5	-4	3	1	0	0	1	0	1.266	-0.912	-1.505	-1.019	-0.987	0.02307	0	-3	-3	1	-5	-3	0	-3	-4	-5	-5	-2	-5	-6	8	-2	-3
2	0.21335	-2	5	1	0	-3	3	2	-4	2	-5	-4	2	-3	-4	-4	0	-1	-5	-2	-5	1	0	0	0	1	0.44	2.897	1.502	1.538	-0.055	0.19482	1	-4	-3	-4	-4	-4	-4	3	-5	2	2	-4	-1	-4	1	2	-2
2	0.1128	5	-4	-4	-5	-1	-4	-4	-3	-4	0	1	-4	-2	3	-4	0	-3	-2	-3	1	0	0	1	1	0	0.393	0.816	2.131	-1.239	-0.547	0.10146	-4	-1	3	-3	-5	2	-2	-4	9	-4	-5	-2	0	-4	-5	-3	-1
2	0.020301	0	4	1	1	-6	1	1	-3	-1	-2	-2	3	-2	-4	-5	0	-1	-3	-3	-4	1	0	0	0	1	-1.474	-0.078	-1.673	0.336	-0.417	0.022136	3	0	-4	-3	-3	0	0	1	-3	-2	2	1	-2	-2	-5	-2	-2
2	0.017642	1	-6	-6	-6	0	-5	-6	-6	-6	4	0	-5	-2	-2	-6	-4	-3	-5	0	6	0	1	0	1	0	1.57	-0.146	-0.733	-0.591	-1.302	0.010339	1	-6	-6	-6	-1	-5	-6	-5	-6	5	2	-5	-2	-4	-6	-4	-3
2	0.51242	1	-2	-1	1	-1	0	2	3	-1	-3	-1	-1	-3	-2	0	-1	-1	-1	-1	-1	0	0	1	0	1	1.045	2.064	1.33	-0.384	1.652	0.5631	1	1	-2	0	-4	0	3	-1	-2	0	-1	-1	0	-3	1	0	1
2	0.56234	1	1	-2	-1	1	-1	-2	2	0	-3	-3	1	-3	-2	3	2	-1	-1	-3	-1	0	0	1	1	0	1.57	-0.146	-0.733	-0.591	-1.302	0.4978	-2	1	0	0	-3	2	-1	0	1	1	1	-2	1	0	-2	-1	-1
2	0.31239	0	-1	-1	-1	-3	-2	-2	5	0	-3	-2	-2	-3	-1	1	-1	-2	1	1	-3	0	0	1	0	1	1.045	2.064	1.33	-0.384	1.652	0.41069	-1	-1	1	2	-4	-1	0	3	1	-1	-3	-1	1	-1	1	-1	-1
2	0.14188	-2	-3	2	5	-5	1	4	-4	0	-3	-3	-2	-3	-6	-3	1	1	-5	-3	-2	0	0	1	0	1	0.113	-0.837	1.477	1.357	-1.453	0.13788	1	0	-3	1	-4	-2	2	-1	-1	-2	-3	-1	-4	-4	5	0	-2
2	0.15636	-1	-2	-1	-2	-1	-2	-2	-3	-1	2	0	-2	-2	-2	-2	-1	5	-1	-3	0	1	0	0	1	0	0.908	1.313	2.213	-0.032	0.326	0.16179	-2	6	0	-2	-4	0	-1	-3	1	-3	-2	2	-3	-2	-2	-2	-2
2	0.14446	1	1	1	1	-4	0	3	1	1	-3	-2	0	-3	-2	-1	-1	-1	-2	-3	-3	1	0	0	0	1	-0.259	-3.242	-3.656	1.05	0.302	0.10639	0	0	1	0	-2	-1	-1	2	0	1	0	0	-2	-3	1	-2	-1
2	0.18593	-2	4	-3	-2	-4	0	-1	-4	-3	1	2	3	0	-3	-4	-3	-3	-3	0	0	1	0	0	1	0	0.393	0.816	2.131	-1.239	-0.547	0.1626	-1	-5	-2	-4	-5	-4	-4	7	-4	-6	-5	-4	-3	-5	-4	-2	-4
2	0.021032	-2	-4	2	1	-5	-3	-3	6	-2	-6	-5	-1	-5	-5	-4	-2	-3	-5	-5	-4	0	0	1	0	1	1.266	-0.912	-1.505	-1.019	-0.987	0.015723	1	-5	-5	-5	-1	-5	-5	-5	-5	4	3	-5	0	2	-3	-4	-3
2	0.16911	3	-1	-2	-3	-2	0	-3	1	-1	0	-3	-1	-2	-1	-2	0	-1	-3	-2	3	0	0	1	1	0	1.045	2.064	1.33	-0.384	1.652	0.1463	2	-2	-1	3	-2	-1	0	3	-2	-4	-4	-1	-4	-5	-2	1	-1
2	0.79506	2	-3	-1	-1	-1	-1	-3	0	-3	-1	4	-3	0	-2	-2	-2	-2	0	-1	0	1	0	0	1	0	1.266	-0.912	-1.505	-1.019	-0.987	0.80075	-2	1	-2	3	-4	2	-2	4	-3	-4	0	1	-3	-4	-2	-2	-1
2	0.007505	-3	-5	-6	-6	-4	-5	-6	-6	-5	-1	6	-5	4	0	-6	-5	-4	-4	-4	-1	0	1	0	1	0	1.266	-0.912	-1.505	-1.019	-0.987	0.007497	-3	-5	-3	-4	-5	-5	-5	7	-5	-7	-7	-4	-6	-6	-5	-2	-4
2	0.14665	5	0	0	0	-4	2	0	-1	-2	-4	-3	0	-3	-5	-4	1	0	-5	-4	-3	1	0	0	0	1	1.266	-0.912	-1.505	-1.019	-0.987	0.10188	-2	1	3	6	-3	1	2	-3	0	-5	-4	-2	-5	-6	-4	-1	-1
2	0.63286	2	0	0	0	-1	0	1	0	-1	-2	-1	0	-1	-1	2	-1	0	-2	-1	0	0	0	1	1	0	0.908	1.313	2.213	-0.032	0.326	0.56862	1	4	-2	0	-2	0	-1	-1	-1	-1	-1	1	-1	-1	-1	0	-1
2	0.49531	-2	1	1	-3	1	0	-2	-2	5	0	-2	1	0	-1	-2	0	2	0	0	0	0	1	0	1	0	-0.169	0.933	1.299	0.945	0.828	0.54873	-1	-1	0	-1	-1	0	0	-3	4	-1	0	-1	-3	2	-1	-1	-1
2	0.65324	0	-1	2	1	-1	-1	-1	2	1	-1	-1	-1	1	-2	0	0	-1	3	-1	-1	0	0	1	1	0	1.045	2.064	1.33	-0.384	1.652	0.55002	0	1	0	1	-3	-1	0	-1	3	0	-2	0	-3	-1	4	0	0
2	0.14159	0	0	-2	-4	-1	2	2	-4	2	1	1	-1	-1	1	-5	-2	-2	1	2	-1	1	0	0	1	0	1.266	-0.912	-1.505	-1.019	-0.987	0.1001	-1	0	0	0	2	0	0	-1	2	0	-1	0	2	1	0	-1	0
2	0.026065	-2	-2	-4	-5	2	0	-2	-5	-2	5	-1	-4	1	0	-5	-2	-1	-1	1	3	0	1	0	1	0	0.393	0.816	2.131	-1.239	-0.547	0.024957	-1	-5	-5	-5	2	-4	-5	-3	-5	3	1	-4	1	1	-4	-2	-1
2	0.16087	5	-3	-3	-1	-3	-3	-1	-1	-3	-2	-2	-3	-3	-4	-3	0	0	-4	-4	0	1	0	0	1	0	1.57	-0.146	-0.733	-0.591	-1.302	0.16971	-3	-3	-1	-4	-4	1	-2	-3	3	0	-2	-3	0	4	-4	-1	-2
2	0.16971	-3	-3	-1	-4	-4	1	-2	-3	3	0	-2	-3	0	4	-4	-1	-2	4	6	-1	1	0	0	1	0	-0.838	1.512	3.097	0.26	0.83	0.18913	-1	0	0	-4	3	1	0	-1	2	0	-1	0	2	1	-5	0	0
2	0.32842	-4	7	-1	-3	-1	2	-2	-3	2	-5	-4	-1	-2	-4	1	-2	-3	-1	0	-4	0	1	0	1	0	0.44	2.897	1.502	1.538	-0.055	0.27433	0	-3	-3	-4	-1	-3	-3	-2	-4	0	-2	-2	-3	-4	3	4	2
2	0.031434	-2	-5	-5	-6	1	-5	-5	-4	-5	5	2	-5	1	3	-5	-1	-2	0	0	2	0	1	0	1	0	-0.397	0.412	1.891	-1.006	-0.59	0.0331	-3	1	2	-1	1	-1	-1	0	2	1	-1	-1	-1	1	-3	0	2
2	0.10599	3	4	2	0	-5	2	0	-3	-2	-5	-4	1	-4	-5	-4	-1	0	-6	-5	-4	1	0	0	0	1	0.44	2.897	1.502	1.538	-0.055	0.1065	-3	1	-2	-3	-6	-1	-2	-4	0	-6	-5	7	-4	-6	-4	-3	-3
2	0.13083	0	1	-2	2	-5	1	0	-1	3	-4	-3	2	0	-4	0	1	1	-5	0	-2	0	0	1	0	1	0.113	-0.837	1.477	1.357	-1.453	0.10475	0	1	0	1	-4	1	-1	-3	-1	-3	-2	-1	-3	-5	4	-1	3
2	0.99911	0	-2	-1	-3	-4	-2	1	-3	-3	-3	-1	4	1	-1	-3	1	-1	-4	1	2	0	0	1	0	1	-0.277	1.648	0.533	1.831	-0.561	0.99915	0	2	3	0	-1	2	0	-1	-3	-2	-1	-2	-3	-4	-1	3	0
2	0.36634	-3	5	2	-3	-4	0	-1	-4	3	-1	1	0	1	1	-4	-2	-3	-4	-1	-3	1	0	0	1	0	0.44	2.897	1.502	1.538	-0.055	0.29607	1	1	-1	1	-4	3	1	-1	-2	-3	-3	1	-3	-4	-3	2	-1
2	0.64077	0	-1	0	3	-4	1	2	2	-3	-3	-3	0	-3	-4	-3	2	-1	-4	-4	0	0	1	0	1	0	1.045	2.064	1.33	-0.384	1.652	0.61469	0	-3	-4	-1	0	-3	-3	-4	-4	4	-1	1	-1	-2	-4	-2	-1
2	0.11377	1	-2	0	-1	-2	0	1	-2	-1	-2	-2	-2	-1	-1	6	-1	-2	-5	-2	-2	0	0	1	1	0	0.421	-1.392	-1.628	0.189	2.081	0.10727	2	0	-1	1	-4	0	2	-2	-1	-5	-5	2	-1	-5	-3	2	2
2	0.30376	-1	2	-2	5	-5	-2	-3	5	-1	-6	-4	-2	-5	-5	-4	-1	-4	-5	-1	-5	0	0	1	0	1	-0.259	-3.242	-3.656	1.05	0.302	0.29924	1	3	-1	-2	0	3	1	-1	1	-4	-4	1	-1	-5	2	0	-1
2	0.12453	-2	-5	-3	-4	-5	-4	-5	7	-4	-6	-6	-4	-5	-6	-5	-3	-4	-5	-5	-6	0	0	1	1	0	1.045	2.064	1.33	-0.384	1.652	0.092834	-4	-3	8	-1	-5	-2	-3	-3	-2	-6	-6	-2	-5	-5	-4	-1	-2
2	0.066668	-2	-5	-3	-4	-5	-4	-5	7	-4	-6	-6	-4	-5	-6	-5	-3	-4	-5	-6	-6	0	0	1	1	0	1.045	2.064	1.33	-0.384	1.652	0.046956	-3	-5	-6	-6	-3	-5	-5	-6	-6	6	-1	-5	-1	-3	-5	-4	-3
2	0.027819	-4	-5	-6	-6	-4	-5	-5	-6	-5	6	3	-5	1	0	-5	-5	-3	-4	-3	0	0	0	1	1	0	0.393	0.816	2.131	-1.239	-0.547	0.025916	-4	-3	-2	-3	-5	-2	-2	-4	11	-5	-4	-3	-4	-4	-5	-3	-4
2	0.59002	-1	1	0	-2	-4	3	-3	1	-1	0	0	1	4	-2	-3	0	-2	-2	-3	-2	0	0	1	0	1	1.266	-0.912	-1.505	-1.019	-0.987	0.52997	-3	0	1	-2	-5	-2	-2	4	1	-2	-3	2	-2	-1	2	0	-3
2	0	0	0	0	0	0	0	0	0	0	0	0	0	0	0	0	0	0	0	0	0	0	0	0	0	0	0	0	0	0	0	0	0	0	0	0	0	0	0	0	0	0	0	0	0	0	0	0	0
2	0.33977	0	3	-1	2	-4	3	1	-2	1	-2	-2	3	-2	-3	0	-1	-2	-4	-3	-2	1	0	0	0	1	-0.503	-1.853	-3.005	0.931	-0.179	0.36476	0	1	-2	-1	-4	0	0	0	0	-1	-1	1	-3	4	0	-2	0
2	0.042809	-2	3	-1	-5	-1	1	-2	-5	-3	1	0	4	-3	-3	-5	-3	-1	-6	-4	3	1	0	0	1	0	-0.277	1.648	0.533	1.831	-0.561	0.043468	-2	1	1	5	-4	2	3	-2	-1	-6	-5	2	-4	-5	-4	-1	-1
2	0.52903	0	0	-2	-1	-2	0	0	-3	0	1	-1	0	-3	0	5	0	0	-5	-1	-1	0	0	1	0	1	1.57	-0.146	-0.733	-0.591	-1.302	0.51828	-2	7	0	-3	0	0	-3	-2	-1	-4	-2	1	-2	-4	0	-1	0
2	0.61988	-2	1	2	0	2	-1	0	3	0	-2	1	-1	-1	-2	-1	0	-2	-1	-3	-2	0	0	1	0	1	0.44	2.897	1.502	1.538	-0.055	0.60918	1	0	0	2	-2	-1	0	0	-2	-2	-1	2	-2	-1	-2	2	0
2	0.52454	-4	-5	-6	-7	-4	-5	-6	-6	-5	1	5	-5	6	3	-6	-5	-4	-2	-3	-1	1	0	0	1	0	1.266	-0.912	-1.505	-1.019	-0.987	0.54333	-3	0	6	0	-6	4	1	-2	1	-6	-3	-1	-4	-3	-5	0	-3
2	0.056285	-3	-2	4	6	-5	-1	-1	-2	1	-3	-4	-3	-3	-5	-4	-1	-1	-6	-5	-1	0	0	1	0	1	-0.259	-3.242	-3.656	1.05	0.302	0.063009	0	-1	0	1	-4	-2	0	6	-2	-3	-5	-2	-5	-5	-3	-1	-3
2	0.50048	4	-3	-3	-4	2	0	-2	0	-2	-4	-5	-2	-4	-6	1	3	1	-6	-5	-3	0	0	1	1	0	0.421	-1.392	-1.628	0.189	2.081	0.39772	-1	-1	1	0	-4	-1	-2	-2	-3	-5	-6	-1	-5	-6	6	4	-2
2	0.073286	-1	0	3	6	-5	-2	-2	-2	1	-1	-4	-3	-5	-4	-4	1	0	-6	-2	-4	0	0	1	0	1	0.67	-2.647	-4.76	-0.228	1.399	0.087147	-3	-2	1	1	-3	-3	1	5	1	-5	-5	-3	-3	-5	-4	0	-2
2	0.048035	-5	-2	4	7	-3	-2	-1	-4	3	-4	-6	-3	-4	-6	-5	-2	-3	-7	-2	-4	0	0	1	1	0	-0.259	-3.242	-3.656	1.05	0.302	0.044594	-3	-4	-5	-5	-4	-2	-4	-5	0	-3	-3	-4	-5	-4	8	-2	-2
2	0.64998	-3	-1	-2	0	-1	-1	-1	-3	0	-1	1	-3	8	-1	-3	0	-2	-2	-3	-1	0	0	1	1	0	1.266	-0.912	-1.505	-1.019	-0.987	0.59339	-1	-2	-1	-3	1	-1	-2	-3	-2	1	3	-2	4	1	-1	-1	-1
2	0.99221	0	-3	0	0	-4	1	1	1	-4	-4	-2	-3	1	-4	4	0	1	-5	-4	-1	0	0	1	0	1	0.421	-1.392	-1.628	0.189	2.081	0.99216	0	2	0	0	-4	2	0	-4	-3	-3	-1	1	-3	-4	1	0	2
2	0.61605	-3	4	3	-1	-4	2	-2	-2	2	-1	-2	-1	-3	1	1	0	-1	-4	-3	-3	0	0	1	0	1	0.44	2.897	1.502	1.538	-0.055	0.49985	0	-1	1	-2	-1	-1	-2	2	1	-3	-2	-2	0	-4	5	2	0
2	0.52052	-1	-4	0	1	-1	-3	-1	6	-4	-5	-5	-3	-4	-5	-4	1	-1	-5	-5	-5	1	0	0	1	0	1.045	2.064	1.33	-0.384	1.652	0.43997	-3	-2	-5	-5	-3	-4	-4	-5	-4	3	5	-4	4	0	-3	-4	-3
2	0.15251	-1	1	-1	-3	0	4	1	-2	1	2	-1	-1	-3	-3	-4	0	-1	-4	2	0	1	0	0	1	0	1.242	-1.262	-0.544	-1.337	-0.279	0.13891	1	0	3	-1	-2	3	0	-2	1	-5	-2	2	-4	-2	-4	2	0
2	0.2652	5	-3	-4	-5	-1	-4	-4	-1	-5	1	0	-4	1	-4	-4	-1	-2	0	-4	1	1	0	0	1	0	1.57	-0.146	-0.733	-0.591	-1.302	0.27399	-1	0	0	-4	3	-2	-1	-5	0	3	0	-4	2	-4	-4	0	1
2	0.19605	0	-4	-5	-4	-1	-4	-2	-4	-6	3	2	-3	-1	-3	-2	-3	1	-6	-4	4	0	0	1	1	0	0.393	0.816	2.131	-1.239	-0.547	0.18057	1	-2	-3	0	-5	-3	0	-1	-3	-4	-5	-2	-3	-6	6	2	2
2	0.070341	-4	-3	-3	-4	-2	-3	-4	-4	7	-2	-1	-3	2	4	-6	-4	-4	7	3	-1	1	0	0	1	0	-1.474	-0.078	-1.673	0.336	-0.417	0.062782	0	0	2	4	-5	2	4	-1	-1	-5	-1	0	-3	-5	-4	-1	-2
2	0.27429	-2	-1	-3	-1	-5	0	-2	-3	-2	-2	-3	-3	-2	-1	-1	-2	-1	11	-1	-2	1	0	0	0	1	-2.128	-0.184	0.672	-0.595	0.009	0.26303	-1	1	1	2	1	1	1	-2	1	-1	-2	1	-4	-5	1	1	1
2	0.97077	-3	-2	-1	6	-5	1	5	-3	-2	-5	-5	-2	-4	-5	-3	0	-2	-5	-4	-4	0	0	1	0	1	0.113	-0.837	1.477	1.357	-1.453	0.97097	1	-2	1	-2	-3	-2	1	-3	-3	-3	0	1	-2	-4	-3	3	3
2	0.9969	-1	-1	-1	-2	-3	1	-1	5	1	-3	0	-2	0	-3	-3	1	-2	-3	-3	-3	0	0	1	0	1	1.045	2.064	1.33	-0.384	1.652	0.99683	-1	0	1	-2	-3	-1	0	-3	-2	2	1	3	3	-2	1	-1	-2
2	0.12898	-2	-5	-4	-5	0	-5	-4	-6	-6	7	1	-4	1	-3	-5	-4	-3	-5	-4	2	1	0	0	1	0	0.393	0.816	2.131	-1.239	-0.547	0.10301	3	-1	-1	1	-4	0	2	-1	-1	-5	-5	1	-4	-5	-2	3	0
2	0.98739	-2	5	-2	-3	-3	-1	-2	-1	-2	-1	2	1	0	-2	0	-1	1	-3	-2	-2	0	0	1	1	0	0.44	2.897	1.502	1.538	-0.055	0.98549	2	0	-1	0	-2	-1	-1	-2	0	-3	-3	-1	-2	-3	2	4	2
2	0.18103	2	4	-2	-1	-1	2	1	-4	1	-2	-1	2	-2	-4	0	-2	-2	-5	-4	-3	1	0	0	0	1	1.57	-0.146	-0.733	-0.591	-1.302	0.2045	-2	-1	-2	4	-3	1	4	-2	0	-3	-2	1	-1	-2	-2	0	0
2	0.023303	-4	1	-1	7	-5	-2	-1	-4	0	-5	-5	-2	-5	-5	-4	-2	0	-6	-5	-5	0	1	0	1	0	-0.259	-3.242	-3.656	1.05	0.302	0.029718	1	-4	-4	-3	-4	-3	-3	-1	-4	-5	-5	-3	-4	-5	8	0	-3
2	0.34609	1	-2	-3	-2	-4	-1	0	-3	3	-4	-3	1	-2	-3	6	-1	0	-4	-2	-3	0	0	1	0	1	0.421	-1.392	-1.628	0.189	2.081	0.31917	0	1	4	0	-2	2	1	-1	0	-4	-3	3	-2	-4	-1	0	-1
2	0.015114	-2	-5	-5	-6	-2	-5	-5	-6	-6	3	1	-5	-1	-3	-5	-4	-1	-5	-4	6	1	0	0	1	0	1.266	-0.912	-1.505	-1.019	-0.987	0.018727	-2	-4	-2	-4	-3	-3	-3	1	-4	-3	-4	-3	-3	-5	-4	0	7
2	0.1345	6	-4	-4	-2	-3	-3	-3	1	-4	-4	-4	-3	-4	-5	-3	1	-2	-5	-4	-2	0	0	1	1	0	1.57	-0.146	-0.733	-0.591	-1.302	0.12597	-5	-5	-6	-6	-5	-6	-6	-6	-4	-3	-2	-6	-2	9	-6	-5	-5
2	0.046671	-3	3	-3	-4	-5	-1	-1	-5	7	-4	-3	-2	-4	1	-5	-3	-3	1	7	-4	1	0	0	0	1	0.44	2.897	1.502	1.538	-0.055	0.045503	-2	-5	-4	-5	-4	-5	-5	-6	-5	6	2	-5	-1	-3	-5	-1	-1
2	0.16914	0	3	-1	-1	-5	2	3	-4	-2	-3	-2	4	1	-4	-2	-1	-2	-5	-4	-4	1	0	0	0	1	0.44	2.897	1.502	1.538	-0.055	0.17325	0	1	-1	0	-5	3	5	-4	-2	-3	-3	3	-4	-5	-4	-2	0
2	0.47933	0	1	-1	-2	-1	-2	-1	-2	1	-1	1	-1	0	4	1	0	-1	1	0	0	0	0	1	0	1	1.266	-0.912	-1.505	-1.019	-0.987	0.37758	0	-1	-1	-1	-2	0	2	1	0	-1	0	-1	-1	0	3	0	-1
2	0.50388	-2	1	0	2	-4	-1	2	-2	-1	0	-2	0	-1	1	3	1	-2	1	-3	-4	0	1	0	0	1	0.421	-1.392	-1.628	0.189	2.081	0.56043	-2	-2	0	1	-4	2	1	-3	1	-2	0	1	1	0	-4	-1	0
2	0.061696	-2	-1	-2	-2	-3	-2	-3	-4	2	-2	1	-2	-2	6	-5	-3	-3	8	3	-2	1	0	0	1	0	-2.128	-0.184	0.672	-0.595	0.009	0.058334	0	-4	-5	-4	-2	-4	-4	-5	-3	3	3	-4	-1	4	-5	-2	-2
2	0.17491	1	2	1	-2	-1	0	0	-2	5	-2	-2	2	-2	-2	1	-2	-2	-2	1	-3	0	0	1	0	1	-1.474	-0.078	-1.673	0.336	-0.417	0.15303	1	-1	2	1	-4	0	-1	4	-1	-5	-4	0	-4	-3	2	0	-1
2	0.47638	0	2	0	-1	-3	0	-2	1	2	-3	-2	1	-3	1	0	3	-1	-3	-3	-3	0	0	1	0	1	0.421	-1.392	-1.628	0.189	2.081	0.46338	-3	1	-2	-3	-4	-2	0	-1	8	-1	-1	-2	-3	-3	1	-1	-3
2	0.41774	-2	-2	0	-2	-4	-2	-3	-1	0	-4	-2	-2	-3	-4	4	4	3	0	-3	-4	0	0	1	0	1	0.421	-1.392	-1.628	0.189	2.081	0.32475	-1	-4	-2	-4	-4	-2	-4	-2	1	1	2	-2	1	0	3	0	1
2	0.073449	2	-2	2	1	-4	4	1	-2	4	-3	-4	0	-3	-5	-2	2	0	-5	-3	-3	1	0	0	0	1	-0.503	-1.853	-3.005	0.931	-0.179	0.063684	-3	-3	1	5	-5	2	5	-2	-3	-5	-5	-2	-4	-5	-3	-2	-3
2	0.91197	1	-2	-1	0	-4	-1	-3	-3	1	0	-2	-1	3	-2	1	0	-2	-3	6	0	0	1	0	1	0	-0.838	1.512	3.097	0.26	0.83	0.926	0	-1	-1	0	-4	-1	-2	-3	-1	-3	-1	-1	2	-1	2	1	1
2	0.34618	4	-2	-2	-3	0	-2	-2	-2	6	-3	-2	-4	-1	2	-5	-1	-2	-4	1	0	0	0	1	1	0	1.242	-1.262	-0.544	-1.337	-0.279	0.39434	-2	3	1	1	0	0	-1	-4	-2	-3	-3	1	-2	-1	2	1	3
2	0.43892	-1	-2	-1	1	-5	-2	-3	-3	-4	-2	-1	-2	-4	-5	7	0	-1	-5	-5	-3	0	0	1	0	1	0.421	-1.392	-1.628	0.189	2.081	0.38351	-2	-3	-1	1	-1	-1	-1	-1	8	-1	-2	1	1	-2	0	-1	-3
2	0.26727	-3	1	3	2	-2	0	2	-1	5	-5	-4	3	-4	-2	-4	-1	0	-5	-4	-2	1	0	0	0	1	-1.474	-0.078	-1.673	0.336	-0.417	0.25601	1	-1	1	1	2	4	-1	-2	3	-2	0	-1	0	-1	-4	0	-2
2	0.31549	-2	1	-2	-2	0	-2	-2	-4	2	-1	0	1	-2	1	2	-2	-2	3	5	-1	1	0	0	1	0	-0.838	1.512	3.097	0.26	0.83	0.33451	-2	-1	-2	-3	2	-2	-4	-2	-2	2	2	-2	2	3	-2	-1	-2
2	0.76526	2	-3	-2	-2	-2	-2	-2	-2	-3	1	-3	-2	-2	-4	0	4	3	-4	-3	-2	0	0	1	0	1	0.908	1.313	2.213	-0.032	0.326	0.75548	-2	2	-4	-4	-3	-3	-4	-5	-4	3	1	-2	3	-2	-4	-3	-2
2	0.98735	3	-3	-2	1	-2	-2	-2	0	-3	0	-3	-2	-2	-4	1	-1	4	-4	-3	0	0	0	1	1	0	1.57	-0.146	-0.733	-0.591	-1.302	0.98874	1	-3	-2	3	-3	1	-2	2	-3	-2	1	-2	-2	-3	-3	2	1
2	0.99172	-1	-2	1	-2	6	-2	-2	0	-2	-1	-2	-2	-2	-3	-2	3	-1	-3	-3	2	0	0	1	1	0	-1.02	-0.255	-0.862	-1.343	0.465	0.99184	-1	-1	-2	-2	-3	-1	-1	-2	-2	-3	-3	3	-2	-3	7	-1	-2
2	0.018858	-4	-4	-6	-6	-4	-5	-5	-6	-5	0	6	-3	0	-2	-5	-5	-4	-4	-3	-1	0	0	1	1	0	1.266	-0.912	-1.505	-1.019	-0.987	0.015424	3	-1	-2	-3	-2	-2	-1	3	-2	-2	-4	-1	-4	-5	-4	4	1
2	0.29463	0	0	1	2	-1	0	2	-1	-1	-2	-2	1	-4	-5	1	1	1	-5	-2	-2	0	0	1	0	1	0.67	-2.647	-4.76	-0.228	1.399	0.28622	1	-1	-1	0	-1	-1	3	-2	-4	0	-3	-1	-1	-5	4	-1	-2
2	0.1364	3	-2	-2	-2	-1	-1	-2	0	-1	-2	-1	-2	1	3	-3	2	0	-3	0	-1	0	0	1	1	0	-0.397	0.412	1.891	-1.006	-0.59	0.14138	3	-3	0	-2	1	-3	-3	2	-3	-1	-3	-3	-3	-4	-3	3	0
2	0.10557	1	-4	2	-4	5	-3	-4	2	-3	-4	-5	-4	-5	-4	-4	5	-1	-6	-4	-3	0	0	1	1	0	0.67	-2.647	-4.76	-0.228	1.399	0.11277	-3	-3	-4	-4	-2	-3	-4	-1	-4	-4	-3	4	-5	-6	7	-3	-1
2	0.051603	-4	4	-5	-6	-5	-2	-4	-6	-2	-1	5	-1	0	0	-5	-4	-4	4	-1	-2	1	0	0	1	0	1.266	-0.912	-1.505	-1.019	-0.987	0.054374	3	-4	1	-4	-2	-3	-3	1	-1	-5	-5	-3	-4	-3	-4	4	-2
2	0.33715	-2	-2	0	0	-4	-1	0	0	-2	-2	-4	0	-4	-5	7	-2	-2	-5	-2	-4	0	0	1	0	1	0.421	-1.392	-1.628	0.189	2.081	0.34547	-1	0	2	-1	-4	-1	1	0	-1	-4	-4	6	-4	-5	0	0	-1
2	0.12134	1	-5	-5	-5	-3	-4	-5	-5	-5	3	2	-4	0	-3	-4	-4	-2	-5	-3	5	1	0	0	1	0	1.242	-1.262	-0.544	-1.337	-0.279	0.098448	4	1	-3	-2	-3	3	0	-2	-3	-2	-3	-1	-3	-3	-3	3	-1
2	0.63134	-2	-5	-4	-4	-5	-4	-4	-4	-5	-5	-5	-4	-5	-6	8	-1	-1	-6	-5	-4	0	0	1	1	0	0.421	-1.392	-1.628	0.189	2.081	0.60039	-3	4	-3	-4	-5	-1	-3	-5	-4	0	0	4	-3	-2	0	-3	-2
2	0.49788	-4	-5	-5	-6	-4	-5	-5	-6	-6	0	6	-5	-1	-2	0	-5	-1	-5	-4	-2	0	0	1	1	0	1.266	-0.912	-1.505	-1.019	-0.987	0.47253	-2	-4	-2	-1	-6	-2	-1	-4	1	-4	-6	-3	-5	-5	8	0	-2
2	0.42705	0	0	-2	-2	-2	0	-2	-2	2	0	-1	2	0	-2	-2	0	3	-4	-3	2	0	1	0	1	0	1.242	-1.262	-0.544	-1.337	-0.279	0.43717	-3	-5	-5	-5	1	-4	-3	-4	-4	3	3	-4	3	3	-4	-4	-3
2	0.85102	2	1	-1	-2	0	1	-1	-3	2	-3	0	1	0	-4	-2	3	0	-5	-4	-1	1	0	0	0	1	0.67	-2.647	-4.76	-0.228	1.399	0.85069	0	1	-1	-1	-1	-1	0	-1	-1	-2	0	0	-2	-3	1	3	0
2	0.84041	-1	0	-1	2	1	1	1	-1	2	-1	-2	1	0	-3	1	0	-1	-3	-2	0	0	0	1	0	1	-0.259	-3.242	-3.656	1.05	0.302	0.83311	-2	-1	-1	0	-5	1	3	2	-1	-3	-2	1	-4	-5	2	1	-2
2	0.53756	-2	3	-1	1	2	2	4	-4	-1	-1	-3	-1	-2	-2	-1	-1	-1	0	-2	-2	0	0	1	0	1	0.113	-0.837	1.477	1.357	-1.453	0.53089	-1	-3	0	3	-4	0	1	-1	-1	-4	-3	-1	-4	-4	1	1	4
2	0.64126	-1	-1	0	-2	-1	-2	-2	-4	0	-1	-2	-2	-2	0	6	0	0	-5	-3	-1	0	0	1	0	1	0.421	-1.392	-1.628	0.189	2.081	0.59314	0	0	0	1	0	1	3	-1	2	-3	-2	0	0	-1	-4	-1	-2
2	0.99924	-1	-1	0	-3	-4	3	0	-2	0	-1	-4	0	-3	-4	-1	4	3	-5	-4	-1	0	0	1	0	1	0.67	-2.647	-4.76	-0.228	1.399	0.99921	2	-1	-1	-1	-3	1	1	-3	-3	0	-2	-3	-3	-4	-3	3	3
2	0.99587	-3	1	1	0	1	0	1	-2	-3	-4	-4	4	-3	0	0	2	0	-4	-3	-4	0	1	0	0	1	-0.277	1.648	0.533	1.831	-0.561	0.99579	0	-1	-1	1	-3	5	1	-3	1	-3	-3	0	-3	-4	1	2	-1
2	0.85062	-1	3	3	1	-4	-1	0	0	0	-3	-2	-1	0	1	1	1	0	-4	-3	-1	0	0	1	0	1	-0.169	0.933	1.299	0.945	0.828	0.83588	-2	0	-2	-1	-2	2	0	-1	-3	-1	-2	4	-3	-2	2	0	0
2	0.34638	-1	-4	-4	-4	-2	-3	-4	-4	-4	1	0	-3	1	-2	-4	-3	-1	-4	0	6	0	1	0	1	0	1.242	-1.262	-0.544	-1.337	-0.279	0.35825	-2	-4	-4	-4	10	-4	-4	-4	-4	-3	-3	-4	-3	-4	-4	-1	-2
2	0.35754	-2	2	4	3	0	0	-1	-1	-2	-2	-3	3	-3	-4	-3	0	0	-4	-3	-3	0	0	1	0	1	-0.169	0.933	1.299	0.945	0.828	0.28525	-1	-3	0	-2	-3	-1	2	5	-3	-4	-4	-1	-3	-4	0	-2	-2
2	0.34089	-1	-3	-3	-4	-2	-3	-3	-4	-3	4	4	-3	2	-2	-3	-3	-2	-3	-2	3	0	0	1	1	0	1.266	-0.912	-1.505	-1.019	-0.987	0.34022	-2	-1	1	0	-3	1	2	-3	1	-2	0	1	1	-1	0	1	2
2	0.66582	-3	0	3	4	-4	-2	-1	-3	-3	-3	-3	3	2	-4	-3	2	-1	-4	-3	-2	0	0	1	0	1	-0.259	-3.242	-3.656	1.05	0.302	0.69657	-2	-3	-3	-2	-3	-3	-3	-4	-4	3	4	1	-1	-1	-2	-1	0
2	0.924	0	2	-1	-2	-4	2	2	-2	-3	-1	-2	0	0	1	1	0	1	-3	1	-1	0	0	1	0	1	-0.503	-1.853	-3.005	0.931	-0.179	0.91105	-2	-1	-1	-3	-4	2	0	4	-3	-2	-3	1	2	-3	-3	-1	1
2	0.77949	-3	1	-3	-4	-5	0	-2	-5	-3	2	0	5	-3	-1	-2	-3	-3	-4	2	-1	1	0	0	1	0	-0.277	1.648	0.533	1.831	-0.561	0.75896	-1	-6	-5	-6	10	-5	-6	-5	-2	-3	1	-5	-3	-4	-5	-3	-3
2	0.10476	1	-3	-1	-1	-4	-2	2	6	-3	-5	-5	-1	-3	-5	-4	-1	-1	-5	-5	-3	0	0	1	0	1	0.113	-0.837	1.477	1.357	-1.453	0.1178	-3	-1	-1	-3	-2	-1	-3	-4	7	-4	-3	0	-3	2	-3	1	-2
2	0.14461	0	-2	-1	-1	0	0	-1	2	-2	-2	-2	-1	-2	-2	5	0	-1	-2	-2	-1	0	0	1	0	1	0.421	-1.392	-1.628	0.189	2.081	0.11472	-4	-4	-4	-5	-4	-3	-4	-5	3	-1	-3	-4	-3	1	-5	-4	-4
2	0.29469	1	-2	-2	-1	-4	-3	-1	2	1	-3	-5	-1	-4	-3	1	4	0	-1	-1	-3	1	0	0	1	0	1.57	-0.146	-0.733	-0.591	-1.302	0.26731	1	1	1	2	0	-1	1	-2	2	-3	-4	3	-2	-2	-1	0	0
2	0.62359	-2	2	0	-2	-2	0	0	-2	-1	-2	-2	5	-2	-1	0	-1	-1	-2	-2	-2	0	0	1	0	1	-0.277	1.648	0.533	1.831	-0.561	0.57193	-1	0	0	5	-2	-1	2	0	0	-3	-2	0	-2	-3	1	-1	0
2	0.77912	0	-1	0	-1	-4	0	-1	4	2	-4	-4	-1	-4	-4	1	2	-1	-4	-4	-1	0	1	0	1	0	1.045	2.064	1.33	-0.384	1.652	0.76448	0	-2	-1	-1	-2	-1	2	-1	0	0	2	1	0	-1	0	-1	-1
2	0.39025	-1	3	-2	-3	-2	-1	-2	-2	-3	-3	-4	5	-3	-4	-3	1	0	-4	-4	0	0	1	0	1	0	0.44	2.897	1.502	1.538	-0.055	0.38888	-2	-3	0	-3	-4	-1	-3	-4	1	-2	-4	3	-4	-5	6	0	3
2	0.6656	-3	-4	-5	-5	-3	-4	-5	-6	-5	3	5	-4	0	-1	-5	-4	-3	-4	-3	2	0	0	1	1	0	1.266	-0.912	-1.505	-1.019	-0.987	0.64384	0	-3	-1	-1	-4	-3	-3	6	0	-5	-5	-3	-4	-5	-3	3	0
2	0.67221	-2	-3	3	7	-5	0	2	-3	-3	-5	-5	-2	-5	-5	-4	-1	-3	-6	-5	-5	0	0	1	0	1	-0.259	-3.242	-3.656	1.05	0.302	0.64889	-2	-2	2	2	-4	4	-2	-2	-3	-1	-4	2	-1	-5	4	1	0
2	0.31344	-1	4	0	-2	-4	-2	-1	-4	0	2	2	0	2	-3	-4	-3	-3	-4	-3	1	1	0	0	1	0	0.44	2.897	1.502	1.538	-0.055	0.32238	0	0	1	2	-3	-2	-2	0	-3	-3	-2	2	0	-4	-3	2	3
2	0.7587	-1	3	-1	-1	-3	0	1	-3	4	-3	-2	3	-3	-3	1	-1	-1	-4	-3	-1	0	0	1	0	1	-0.277	1.648	0.533	1.831	-0.561	0.72506	0	0	-2	0	-1	0	-2	-1	-3	-3	-3	-2	-1	-4	6	1	-1
2	0.38731	1	-3	-1	2	-1	2	-2	-4	2	-3	-3	2	-3	-4	-3	0	4	2	-4	-3	0	0	1	0	1	-0.277	1.648	0.533	1.831	-0.561	0.3723	-2	1	-1	-1	1	0	-3	-4	1	-1	-3	2	-3	-4	0	-1	5
2	0.12838	-1	-4	-5	-5	-3	-4	-3	-5	-5	3	1	-4	4	-1	-4	-3	1	-4	-3	5	1	0	0	1	0	1.242	-1.262	-0.544	-1.337	-0.279	0.10068	2	0	-2	-3	-3	1	-2	-2	-3	-1	-4	2	-3	-4	-3	4	1
2	0.51241	3	0	-3	-3	-3	0	-1	-1	-3	0	-2	1	-3	-4	-3	2	3	-5	-4	-2	1	0	0	1	0	0.908	1.313	2.213	-0.032	0.326	0.5106	-1	2	0	3	-5	4	3	0	-2	-5	-5	1	-4	-5	-3	-2	0
2	0.36085	2	-4	-4	-4	7	0	-4	-4	-4	1	1	-4	-2	-1	-4	2	-2	-5	-4	0	1	0	0	1	0	-1.02	-0.255	-0.862	-1.343	0.465	0.36318	-3	0	2	1	-4	5	1	-2	-3	-1	-1	-2	1	-4	-3	-1	3
2	0.33815	4	-1	-1	-4	-3	-3	-1	0	-4	-1	-1	-3	1	-4	-4	0	3	-5	-4	-1	1	0	0	1	0	1.57	-0.146	-0.733	-0.591	-1.302	0.31248	-1	4	-1	-1	-4	2	1	-2	-3	0	-2	1	-3	1	0	-1	0
2	0.5319	5	-1	-4	-4	1	-3	-4	0	-4	-3	0	-3	0	-4	-4	0	1	-5	-4	1	1	0	0	1	0	1.57	-0.146	-0.733	-0.591	-1.302	0.54335	1	1	-1	0	-2	0	0	-1	-3	-4	-2	5	-4	-5	0	0	0
2	0.37802	1	1	0	1	-3	1	1	3	-3	-4	-3	-2	-3	-4	-1	2	0	-4	-3	-2	0	0	1	0	1	1.045	2.064	1.33	-0.384	1.652	0.38629	0	-2	1	2	-1	3	2	1	-2	-1	-3	-1	-1	-4	-3	1	0
2	0.43754	-3	-5	-5	-5	9	0	-5	-5	-5	3	1	-4	-2	-3	-5	-2	-3	-4	-4	0	1	0	0	1	0	-1.02	-0.255	-0.862	-1.343	0.465	0.41684	-3	-3	0	6	-5	1	3	-4	-3	1	-2	-1	-4	-5	-4	0	-3
2	0.57799	-3	-3	3	6	-5	-2	1	-3	-3	-5	-5	-3	-4	-5	-3	2	-2	-5	-4	-5	0	0	1	0	1	-0.259	-3.242	-3.656	1.05	0.302	0.56032	2	-4	0	-1	-4	1	-1	-1	-1	1	-3	-3	-3	-1	4	2	1
2	0.48196	-1	-2	-2	-2	-4	0	-4	-3	0	0	0	-3	-2	0	-4	2	5	0	-4	0	1	0	0	1	0	0.908	1.313	2.213	-0.032	0.326	0.47305	3	0	2	1	-4	0	2	0	-3	-2	-5	1	-4	-3	-4	0	0
2	0.36368	-2	-2	1	4	-5	0	5	-3	-1	-5	-5	-1	-2	-5	-2	-2	-2	-5	-4	-4	1	0	0	0	1	-0.259	-3.242	-3.656	1.05	0.302	0.34276	1	-2	-2	2	-4	1	3	-3	-3	-3	-2	1	-2	-4	-3	-2	3
2	0.51502	0	0	-1	0	-5	0	6	-4	0	-4	-4	3	-4	-4	-2	-1	-1	-5	-2	-4	1	0	0	1	0	0.113	-0.837	1.477	1.357	-1.453	0.46837	1	2	-1	1	-5	1	3	-4	-1	-4	-1	4	-4	-2	-4	-2	-2
[truncated: 14 more rows]
[truncated: 617 more columns]
