# Supplementary material for: Prediction of S-Nitrosylation Modification Sites Based on Kernel Sparse Representation Classification and mRMR Algorithm
Source: Biomed Res Int. 2014 Aug 12;2014:438341. doi: 10.1155/2014/438341 (PMC4145740; doi:10.1155/2014/438341)
Supplement: Supplementary file 1 — supplementary material S1:lists 645 protein sequences containing S-nitrosylation sites. supplementary material S2:lists both of the protein sequence Uniprot ids and S-nitrosylation site locations in the training and testing sets, respectively. supplementary material S3:presents the training set with 666 features. supplementary material S4:presents the testing set with 666 features. supplementary material S5:lists the order of the 666 features ranked by the mRMR algorithm. [file 438341.f1.zip › S4.csv]

class	AA1_disorder	AA1_pssm_1	AA1_pssm_2	AA1_pssm_3	AA1_pssm_4	AA1_pssm_5	AA1_pssm_6	AA1_pssm_7	AA1_pssm_8	AA1_pssm_9	AA1_pssm_10	AA1_pssm_11	AA1_pssm_12	AA1_pssm_13	AA1_pssm_14	AA1_pssm_15	AA1_pssm_16	AA1_pssm_17	AA1_pssm_18	AA1_pssm_19	AA1_pssm_20	AA1_ss_1	AA1_ss_2	AA1_ss_3	AA1_sa_1	AA1_sa_2	AA1_Codon diversity	AA1_Electrostatic charge	AA1_Molecular volume	AA1_Polarity	AA1_Secondary structure	AA2_disorder	AA2_pssm_1	AA2_pssm_2	AA2_pssm_3	AA2_pssm_4	AA2_pssm_5	AA2_pssm_6	AA2_pssm_7	AA2_pssm_8	AA2_pssm_9	AA2_pssm_10	AA2_pssm_11	AA2_pssm_12	AA2_pssm_13	AA2_pssm_14	AA2_pssm_15	AA2_pssm_16	AA2_pssm_17
1	0.99539	-1	1	1	2	-5	3	2	1	-3	-3	-2	0	-4	-1	0	0	0	-5	-4	-4	0	0	1	0	1	0.113	-0.837	1.477	1.357	-1.453	0.99522	-2	3	0	-1	-5	0	1	0	-3	-5	-5	4	-4	-5	2	0	-3
1	0.15618	-2	-4	-3	-4	-1	-3	-3	-4	-4	-3	-4	-3	-3	-5	-4	0	8	-5	-4	-3	0	1	0	1	0	0.908	1.313	2.213	-0.032	0.326	0.1234	-2	2	-2	3	-3	0	3	-4	-3	-4	-5	4	-4	-6	-4	0	2
1	0.94835	-1	-2	-3	-3	-2	-1	-3	-3	-2	2	2	-2	6	0	-3	-2	-1	-2	-1	1	0	0	1	0	1	-1.005	1.212	2.219	-0.663	-1.524	0.948	-1	2	0	-1	-3	1	1	-2	-1	-3	-3	5	-2	-3	-1	0	-1
1	0.1426	1	0	-2	-3	-2	1	3	-2	-3	0	-2	-1	3	-4	-1	2	1	-5	-4	0	0	1	0	0	1	-1.005	1.212	2.219	-0.663	-1.524	0.13411	-1	-1	-1	-3	3	-3	-4	-4	3	1	3	-1	0	4	0	-2	-3
1	0.68821	2	0	4	2	-5	1	2	-3	0	-3	-4	0	-2	-5	0	0	0	-5	-3	-3	1	0	0	0	1	1.57	-0.146	-0.733	-0.591	-1.302	0.64398	-3	-4	0	-4	-4	-3	-4	-4	-4	-2	-3	-3	2	-5	-4	-1	7
1	0.22031	-3	-2	-2	4	-6	0	6	-4	-2	-5	-5	-2	-4	-5	-3	-2	-3	-5	-4	-5	1	0	0	1	0	0.113	-0.837	1.477	1.357	-1.453	0.23796	-4	-5	-5	-6	2	-5	-5	-5	-4	0	4	-5	0	6	-5	-4	-3
1	0.93542	0	2	1	3	-2	0	4	-1	-2	-5	-2	2	-1	-5	-4	0	-1	-6	-5	-2	1	0	0	0	1	0.113	-0.837	1.477	1.357	-1.453	0.93404	-1	-1	-1	3	-5	4	5	-4	-2	-3	-4	0	-2	-5	-4	0	-1
1	0.30752	5	-4	-3	-4	1	-3	-3	-2	-4	-3	-2	-3	-3	-5	-3	3	3	-5	-4	-2	0	0	1	1	0	1.57	-0.146	-0.733	-0.591	-1.302	0.33402	-3	-3	-2	-3	-5	-2	-3	4	0	-5	-5	1	-5	-6	6	0	-2
1	0.59046	-4	-2	-1	3	-6	1	7	-3	-3	-6	-6	-1	-5	-6	-4	-2	-3	-6	-5	-5	1	0	0	0	1	-0.259	-3.242	-3.656	1.05	0.302	0.59722	-3	-4	-5	-6	-2	-4	-5	-6	1	0	4	-5	3	1	-5	-3	-2
1	0.5441	-4	-5	-5	-6	-5	-5	-5	-5	-4	-2	0	-5	-1	9	-6	-5	-4	-2	1	-3	1	0	0	1	0	-0.397	0.412	1.891	-1.006	-0.59	0.58064	4	-2	-1	-1	-4	-1	3	1	-2	-4	-4	-1	-2	-5	-1	0	-1
1	0.5181	1	0	3	4	1	1	0	-2	-3	-1	-3	0	-1	0	-4	-1	0	-5	-4	-4	1	0	0	0	1	-0.259	-3.242	-3.656	1.05	0.302	0.49196	-1	3	3	-1	-5	2	0	-2	0	-4	-3	4	-4	-5	0	-2	2
1	0.04752	-4	-4	0	8	4	-3	0	-4	-3	-5	-6	-3	-5	-6	-4	-2	-3	-6	-5	-5	0	0	1	1	0	-0.259	-3.242	-3.656	1.05	0.302	0.048711	5	-4	-4	-4	-3	-3	-3	-2	-3	-1	-3	-3	-3	-4	-1	0	-2
1	0.079336	1	-2	-1	0	-1	-1	2	-2	5	-5	-5	-3	-2	-5	-3	4	1	-3	-1	-3	1	0	0	1	0	0.113	-0.837	1.477	1.357	-1.453	0.086679	1	0	0	2	-5	2	4	-1	-2	-5	-4	2	-4	-5	-1	-1	-2
1	0.093956	-2	0	2	2	-2	0	0	5	1	-6	-6	0	-4	-6	-1	-1	-3	-6	-4	-5	0	0	1	0	1	0.67	-2.647	-4.76	-0.228	1.399	0.10267	-1	-5	-2	0	-3	-3	-1	-5	-5	3	2	-4	0	0	1	-1	-2
1	0.32846	-3	-5	-4	-5	-2	-4	-5	-5	-5	6	0	-4	1	-2	-5	-3	0	-5	-3	3	0	1	0	1	0	0.393	0.816	2.131	-1.239	-0.547	0.32784	-3	7	-2	-3	-5	-1	-2	-4	1	-4	-4	3	-3	-5	-2	-1	-2
1	0.077396	1	1	2	1	-4	1	2	-2	1	-5	-5	2	-3	-5	-3	3	-2	-5	-4	-4	0	0	1	0	1	1.045	2.064	1.33	-0.384	1.652	0.07631	-1	2	2	-2	-4	0	1	-1	-3	-4	-4	4	-3	-5	-3	2	2
1	0.2062	-1	-1	-1	-2	-2	1	2	-4	-2	1	-2	0	-1	-2	2	-1	2	-3	-2	1	0	0	1	0	1	0.421	-1.392	-1.628	0.189	2.081	0.2092	-2	-3	-5	-5	-3	0	-3	-5	-3	4	0	-1	-1	-3	-5	-4	-2
1	0.52131	-1	0	2	0	-2	-1	0	-2	-2	-3	-3	0	-2	-4	-2	4	2	-4	-3	-2	0	1	0	0	1	0.67	-2.647	-4.76	-0.228	1.399	0.5064	-1	-3	-2	-3	-4	-3	-3	7	-3	-5	-5	-3	-4	-3	-3	-1	-3
1	0.33578	-2	-1	-1	-1	-4	-1	-1	-3	9	-4	-4	-2	-3	-2	-3	-2	-3	-4	1	-4	1	0	0	1	0	-1.474	-0.078	-1.673	0.336	-0.417	0.32197	-2	-1	-1	2	-4	2	6	-3	-1	-4	-4	0	-3	-4	-2	-1	-1
1	0.52443	-2	-4	-3	-4	-2	-4	-4	-5	-4	6	1	-4	3	-1	-4	-3	-2	-4	-3	2	0	1	0	1	0	0.393	0.816	2.131	-1.239	-0.547	0.46572	0	-4	-4	-4	-2	-3	-4	-4	-4	3	0	-3	0	-2	-4	-3	-1
1	0.14004	1	-5	-1	-4	-5	-4	-4	7	0	-6	-6	-4	-5	-6	-5	0	-4	-5	-5	-5	0	0	1	1	0	1.045	2.064	1.33	-0.384	1.652	0.12352	1	0	1	-3	-4	-1	-1	-3	4	1	-2	1	-1	-4	-2	-2	4
1	0.2235	1	-1	1	1	-4	2	2	-2	1	-3	-2	2	-2	-2	2	-1	0	-4	-2	-2	0	0	1	0	1	0.113	-0.837	1.477	1.357	-1.453	0.16718	-1	-3	-3	-2	-3	-2	-2	-2	-1	1	2	-1	-1	0	2	0	2
1	0.07156	-4	-4	0	8	-6	-2	0	-3	-2	-5	-6	-3	-5	-6	-4	-2	-3	-7	-5	-5	0	0	1	0	1	-0.259	-3.242	-3.656	1.05	0.302	0.071787	-3	-4	-4	-4	-5	-3	-3	-4	-4	-5	-5	-3	-5	-6	9	-3	-3
1	0.99775	-2	0	1	-1	3	-3	-4	0	-1	0	0	-3	3	1	3	-1	-1	-4	0	1	0	0	1	1	0	1.242	-1.262	-0.544	-1.337	-0.279	0.99766	-3	1	0	-2	-4	6	0	-2	0	-2	-4	0	-3	-4	2	0	-1
1	0.048337	-3	-1	-2	-6	-2	-4	-5	-6	3	-1	1	-2	-2	6	-6	-4	-4	3	6	-2	0	0	1	1	0	-0.397	0.412	1.891	-1.006	-0.59	0.03545	-2	0	-3	-2	-5	-1	-2	-1	-3	-4	-4	-2	-3	-6	7	-3	-2
1	0.31481	-1	-2	0	4	-3	-1	0	-1	-1	-3	-3	-2	-2	-3	1	2	3	-3	-2	-2	1	0	0	0	1	-0.259	-3.242	-3.656	1.05	0.302	0.3442	-1	-2	2	0	-2	-1	-1	4	0	-1	-2	-2	-2	-2	0	-1	0
1	0.75857	0	-1	0	2	-1	1	1	1	1	-2	-2	0	-1	-1	0	0	0	0	0	-1	0	0	1	0	1	-0.259	-3.242	-3.656	1.05	0.302	0.72564	-1	-2	-2	-2	-1	-2	-2	-2	-2	2	2	-2	0	2	0	0	-1
1	0.028119	0	0	1	1	-2	-1	1	1	6	-5	-6	2	-2	-5	2	0	-4	-6	-4	-5	1	0	0	0	1	-0.277	1.648	0.533	1.831	-0.561	0.026452	4	-3	-1	-4	1	-2	-2	-3	-2	-1	3	-3	2	0	-2	-1	-2
1	0.12075	0	-4	-5	-5	-2	-4	-5	-5	-3	-2	3	-4	-2	5	-5	-1	0	-2	4	-2	0	0	1	1	0	-0.838	1.512	3.097	0.26	0.83	0.15418	5	-3	-3	-3	-1	-3	-3	-1	-4	-4	-4	-3	-4	-5	-3	5	-2
1	0.065891	1	4	-1	-3	-5	6	-2	-3	-1	-3	-3	1	1	-6	-5	-1	-2	0	-5	-2	1	0	0	1	0	0.44	2.897	1.502	1.538	-0.055	0.089808	2	0	3	-4	-5	1	-1	-4	1	-4	0	1	-1	-1	-4	2	2
1	0.5157	-3	2	-4	-4	-4	-3	-3	-4	-3	-2	2	-1	-2	2	-1	-3	-3	9	0	-3	1	0	0	1	0	-2.128	-0.184	0.672	-0.595	0.009	0.46381	-3	-2	1	5	-4	0	4	-3	-2	-4	-3	-1	0	-4	-2	0	1
1	0.80388	1	-3	-3	-3	-3	-2	1	-1	2	-1	-1	-3	5	1	-4	-2	1	-3	-1	2	0	0	1	0	1	-1.005	1.212	2.219	-0.663	-1.524	0.81664	-1	-2	2	-1	-4	0	4	-2	-2	-1	-3	3	1	-4	0	-1	-2
1	0.23692	-3	-3	-4	-4	-4	1	0	-5	0	2	2	-3	6	1	-5	-1	-2	1	-1	1	0	1	0	1	0	-1.005	1.212	2.219	-0.663	-1.524	0.22251	-1	-3	2	-1	-4	0	0	-4	-1	0	2	-1	-2	-2	3	0	2
1	0.033606	3	-3	1	-3	4	-3	-3	3	-3	-2	-4	-4	-4	-5	-4	2	1	-5	-4	-1	1	0	0	1	0	1.045	2.064	1.33	-0.384	1.652	0.030653	6	-4	-4	-5	-1	-4	-4	-2	-4	-2	-2	-4	4	-4	-3	0	1
1	0.53597	-2	-5	-6	-6	1	-3	-3	-5	-5	1	3	-5	5	1	-3	-2	-3	6	-3	3	1	0	0	1	0	-1.005	1.212	2.219	-0.663	-1.524	0.55287	-1	0	1	-3	0	-1	-1	-3	-2	1	2	-1	2	-2	-4	1	1
1	0.99967	2	-1	0	0	-4	-1	-1	-3	1	-2	-4	2	-3	0	4	0	1	-4	-3	-2	0	0	1	0	1	1.57	-0.146	-0.733	-0.591	-1.302	0.99959	3	-3	-3	-3	0	1	0	-1	-3	0	0	0	-3	-4	0	2	-1
1	0.20669	-3	-3	-1	-4	-5	-3	-4	-5	9	-2	-4	-4	-4	1	-5	-4	-4	-2	7	-4	1	0	0	1	0	-1.474	-0.078	-1.673	0.336	-0.417	0.16388	-4	-5	-5	-6	1	-5	-4	-5	-4	-3	-1	-5	-1	8	-4	-1	-3
1	0.18115	-3	-4	-5	-5	-3	-4	-5	-6	-5	5	5	-4	0	-1	-5	-4	-3	-4	-3	1	1	0	0	1	0	1.266	-0.912	-1.505	-1.019	-0.987	0.16157	-1	1	-1	0	-5	4	1	-3	-2	-4	-3	5	-3	-5	-3	-1	-2
1	0.08355	-1	-3	-1	0	-4	-1	3	-2	-2	-4	-5	-1	-2	-5	-3	3	5	-5	-4	-3	0	0	1	0	1	0.908	1.313	2.213	-0.032	0.326	0.073782	0	-3	-4	-5	-2	-4	-4	-4	-4	1	-2	-3	-2	-4	-4	-1	3
1	0.45175	-5	-5	-6	-7	-4	-4	-5	-5	-4	-5	-4	-5	-3	0	-6	-5	-5	12	0	-5	0	0	1	1	0	-2.128	-0.184	0.672	-0.595	0.009	0.44288	-3	-5	-5	-6	-3	-5	-5	-6	-5	6	2	-5	3	-2	-5	-4	-3
1	0.23245	2	0	0	3	-4	-1	4	0	-1	-4	-3	-1	0	-4	-3	-1	-1	-4	-3	-2	1	0	0	0	1	0.113	-0.837	1.477	1.357	-1.453	0.21148	-2	-2	-3	-3	-3	1	0	-4	-2	3	1	0	-2	-3	-4	-2	4
1	0.2118	0	3	0	-2	0	-1	-1	2	0	-2	-2	3	-1	-3	-4	2	-1	-4	-4	-3	0	0	1	0	1	0.44	2.897	1.502	1.538	-0.055	0.17374	-1	-4	-3	-2	-4	-2	1	-5	0	4	3	-3	1	-2	-1	0	-3
1	0.91145	-2	0	-3	-3	-5	-1	-2	0	-3	-5	-5	5	-4	-5	5	-2	-3	-5	-4	-4	0	1	0	0	1	0.421	-1.392	-1.628	0.189	2.081	0.90701	0	-4	-4	-4	-3	-2	0	-4	-4	2	3	-3	-1	-2	-4	-3	1
1	0.005383	0	-4	1	-4	3	1	-4	0	3	0	-1	-4	2	1	1	0	0	4	2	0	0	1	0	1	0	1.57	-0.146	-0.733	-0.591	-1.302	0.007675	-3	-5	-2	-5	-5	-5	-5	-5	-2	-3	-3	-5	-3	7	-5	-3	-4
1	0.36645	0	-3	-1	-3	-5	-2	1	-3	-2	3	1	-3	4	0	-2	-3	-1	6	-2	1	1	0	0	1	0	1.242	-1.262	-0.544	-1.337	-0.279	0.34112	-2	0	-2	1	-5	1	3	0	-1	0	-2	0	-1	-1	-2	0	1
1	0.29192	-4	8	-3	-4	-6	0	-2	-5	-2	-5	-4	0	-4	-5	-4	-3	-3	-5	-4	-5	1	0	0	1	0	0.44	2.897	1.502	1.538	-0.055	0.24859	1	-4	-3	-3	-4	-4	-4	7	-4	-6	-6	-2	-5	-5	-4	0	-3
1	0.1142	-1	4	0	-2	-3	2	1	-2	-1	-4	-1	2	-2	-3	-4	0	1	-3	-3	-3	1	0	0	0	1	-0.169	0.933	1.299	0.945	0.828	0.11729	0	4	-1	0	-5	1	1	-2	0	-5	-4	3	-1	-4	-4	0	0
1	0.75637	1	0	1	-1	1	0	-1	1	-1	-1	-2	0	-1	-1	0	1	2	-1	1	-1	0	1	0	0	1	1.045	2.064	1.33	-0.384	1.652	0.70618	0	0	-1	-2	-2	1	-2	0	2	-2	-1	-1	-1	-1	0	1	-1
1	0.48489	0	-3	-2	3	-1	1	2	4	1	-5	-5	1	-4	-5	-3	1	-2	-5	-4	-4	0	0	1	0	1	1.045	2.064	1.33	-0.384	1.652	0.42947	1	-4	-1	-4	-3	-3	-4	0	5	3	0	-4	-2	-3	-4	-3	-3
1	0.30452	-2	2	3	2	-1	1	2	-1	2	-3	-5	0	-4	-5	-4	3	-1	0	-2	-4	1	0	0	0	1	-0.259	-3.242	-3.656	1.05	0.302	0.2889	-3	0	2	4	-1	3	2	0	2	-5	-5	1	-4	-5	-4	1	-1
1	0.014843	0	-2	-1	3	-4	2	3	0	-2	-4	-4	0	-3	-4	-3	0	3	-4	-3	-3	0	0	1	0	1	0.908	1.313	2.213	-0.032	0.326	0.011286	-2	-1	-3	-2	-3	0	-1	-2	-1	1	2	-3	-1	-3	-3	-2	1
1	0.062139	1	-1	3	0	-5	3	0	-2	0	-3	-3	1	-1	-4	-4	2	0	-3	-3	-3	0	0	1	0	1	-0.169	0.933	1.299	0.945	0.828	0.066924	-1	-2	1	1	-4	-1	0	-1	-3	-3	-3	-1	-3	-4	-3	2	5
1	0.95362	1	0	0	-1	-1	1	0	-1	1	1	-1	3	-1	0	-2	0	-1	-3	0	-2	0	0	1	0	1	-0.277	1.648	0.533	1.831	-0.561	0.95154	0	-1	2	0	-1	2	2	0	-1	-1	-1	-1	2	-2	1	-1	-1
1	0.56825	-4	-5	-5	-6	-4	-4	-5	1	-5	-3	-3	-5	-3	3	-6	-4	-4	11	0	1	0	1	0	1	0	-2.128	-0.184	0.672	-0.595	0.009	0.52154	-1	-1	0	-1	-4	0	-1	3	-3	-1	-2	-1	0	-1	-1	3	0
1	0.228	-1	-3	3	3	-3	0	-1	5	1	-4	-3	-1	-5	-5	-5	-1	-3	-6	-3	-4	0	0	1	0	1	1.045	2.064	1.33	-0.384	1.652	0.22846	-4	1	-2	-4	-1	-1	-2	-5	-1	0	-3	7	1	-5	-4	-2	-4
1	0.31098	-1	-3	4	1	-4	1	-2	1	0	-1	0	-2	2	-3	-3	-1	0	1	-1	2	1	0	0	1	0	1.242	-1.262	-0.544	-1.337	-0.279	0.29141	3	-3	1	-3	-3	-3	-2	-2	-3	-2	0	-3	3	4	-1	0	-2
1	0.33896	-1	-1	-3	2	-4	1	-2	-2	1	-1	-4	-2	-4	-5	6	2	-1	-5	-1	-2	0	0	1	1	0	0.421	-1.392	-1.628	0.189	2.081	0.41469	-4	-3	-2	-1	3	-4	-3	-4	-5	5	3	-1	-2	-1	-3	-3	-4
1	0.10762	-3	1	-3	-4	-5	-2	-3	-5	-4	-2	3	6	-2	0	-4	-2	-3	-5	-4	-3	0	1	0	1	0	1.266	-0.912	-1.505	-1.019	-0.987	0.14513	-4	-4	-5	-5	-1	-4	-2	-6	-4	2	5	-4	2	-2	-5	-4	-3
1	0.011794	-4	-3	8	-1	-5	-1	-2	-3	5	-6	-6	-3	-5	-5	-5	-2	-3	-6	-4	-6	1	0	0	1	0	-0.169	0.933	1.299	0.945	0.828	0.012361	-1	-5	-5	-6	-3	-2	-4	-4	-5	5	1	-5	-1	-3	-5	-4	-2
1	0.41028	-2	0	2	-3	-3	-2	-3	-3	-3	-3	-3	-2	-3	-4	-3	1	6	5	-3	-2	0	0	1	1	0	0.908	1.313	2.213	-0.032	0.326	0.50594	1	-4	-3	-3	-1	-3	-3	-3	-4	1	-3	-3	-3	-4	7	1	-2
1	0.044004	3	0	-2	2	-3	2	0	-2	1	-2	-1	0	-4	-4	3	-1	-1	-5	-4	0	0	0	1	1	0	1.242	-1.262	-0.544	-1.337	-0.279	0.042844	1	-3	-1	5	-4	-1	4	1	-2	-5	-5	-1	-5	-6	-3	-1	-2
1	0.079437	-2	-5	-3	-4	-5	-4	-5	7	-4	-6	-6	-4	-5	-6	-5	-2	-4	-5	-6	-6	0	0	1	1	0	1.045	2.064	1.33	-0.384	1.652	0.068041	6	-4	-4	-4	-3	-3	-3	-1	-4	-4	-4	-3	-3	-5	-3	1	-2
1	0.23243	-1	-3	0	6	-6	1	3	-1	0	-6	-6	-2	-5	-4	-2	0	-2	-4	-2	-5	0	0	1	0	1	0.113	-0.837	1.477	1.357	-1.453	0.22345	-3	-5	-6	-6	-4	-5	-5	-6	-6	5	1	-5	-1	-2	-5	-5	-3
1	0.42268	-4	-3	-2	-4	-6	0	-3	-5	11	-6	-6	-3	-4	-4	-5	-3	-4	-5	-1	-6	0	0	1	1	0	-1.474	-0.078	-1.673	0.336	-0.417	0.29112	-3	-5	-5	-4	-6	-4	-4	-5	-5	-6	-6	-4	-5	-6	9	-3	-4
1	0.62395	-3	-2	2	2	2	0	0	-2	1	-1	1	1	1	-1	0	-1	1	0	1	-2	0	0	1	0	1	-0.259	-3.242	-3.656	1.05	0.302	0.66905	-2	0	0	0	0	1	3	-3	2	-2	-2	1	-1	-2	-2	1	0
1	0.029013	-3	-5	-5	-6	-4	-5	-6	-6	-6	7	1	-5	-1	-3	-5	-5	-3	-5	-4	4	0	1	0	1	0	0.393	0.816	2.131	-1.239	-0.547	0.025775	-1	-5	-4	-6	-3	-5	-5	-5	-6	6	-1	-5	-1	-3	-5	-4	-3
1	0.027433	6	-4	-4	-4	-1	-3	-3	0	-4	-3	-3	-3	-2	-2	-3	-1	-2	-5	-4	-1	0	1	0	1	0	1.57	-0.146	-0.733	-0.591	-1.302	0.021415	-3	7	-3	-4	-5	-1	0	-5	-2	-3	-4	2	-4	-5	-4	-2	1
1	0.26948	2	0	-1	-3	-4	5	1	0	-3	-3	-2	-1	-1	-5	-4	1	1	-5	-4	-3	1	0	0	1	0	-0.503	-1.853	-3.005	0.931	-0.179	0.26587	-1	-4	-4	-5	-3	-4	-4	-5	-5	5	1	-4	-1	-3	-4	0	-2
1	0.40757	-1	2	2	-1	-2	1	3	-2	-1	-5	-3	2	-4	-1	3	-1	-2	-5	-2	-2	0	0	1	0	1	-0.277	1.648	0.533	1.831	-0.561	0.3584	-2	3	0	-2	-2	0	-1	-1	1	-3	-4	3	-1	-4	5	-1	-1
1	0.29106	0	-2	-2	-2	-1	-3	-3	5	0	-1	-4	-3	-4	-4	3	-1	2	-4	-4	-1	0	0	1	1	0	1.045	2.064	1.33	-0.384	1.652	0.33996	1	1	0	0	-4	2	4	-2	0	-3	-4	1	-3	-4	0	0	-2
1	0.53188	0	-1	2	3	-4	2	4	-2	-2	-3	-3	0	-3	-4	-2	1	0	-4	-3	-3	0	0	1	0	1	-0.259	-3.242	-3.656	1.05	0.302	0.53076	1	0	0	5	-3	1	1	-1	-1	-3	-4	1	-3	-4	1	-1	-1
1	0.005137	-3	-4	-5	-5	-3	-4	-5	-5	-5	3	5	-4	2	0	-5	-3	-1	-4	-3	0	1	0	0	1	0	1.266	-0.912	-1.505	-1.019	-0.987	0.00524	-1	-4	-2	-2	-3	0	-4	-3	-2	0	4	-4	5	-2	-4	-2	-1
1	0.17011	-3	-4	-4	-3	-4	-3	-3	-4	-4	-3	-5	-3	-4	-5	8	-2	3	-6	-5	-3	0	0	1	1	0	0.421	-1.392	-1.628	0.189	2.081	0.18284	-4	-2	8	-1	-5	-2	-2	-2	-1	-5	-6	-2	-4	-5	-4	-1	-2
1	0.31299	-1	0	6	-1	1	4	-2	-3	2	-5	-4	-2	0	-5	-4	1	-2	-5	-4	-5	0	1	0	1	0	-0.503	-1.853	-3.005	0.931	-0.179	0.26465	-2	-5	-3	-3	-5	-4	-3	7	-4	-6	-5	-3	-2	-2	-5	-3	-3
1	0.054178	-2	-5	-4	-3	-3	-5	-5	-6	-6	3	-2	-5	-2	-3	-5	-3	1	-5	-4	6	0	0	1	1	0	1.242	-1.262	-0.544	-1.337	-0.279	0.064559	-4	-4	-1	8	-6	-3	0	-3	-4	-5	-6	-3	-4	-6	-4	-2	-3
1	0.08102	-3	-5	-3	-5	-3	-4	-5	-5	-5	6	0	-4	0	-2	-5	-4	-1	-4	-1	3	0	0	1	1	0	0.393	0.816	2.131	-1.239	-0.547	0.10515	0	1	1	1	-4	1	1	0	3	-4	-4	1	-4	-4	1	0	1
1	0.42412	-2	-4	-4	-4	-2	-4	-4	-5	-5	4	0	-4	0	-2	-4	-3	-1	-4	-3	5	0	1	0	1	0	1.242	-1.262	-0.544	-1.337	-0.279	0.41779	2	-2	3	-2	-3	3	-1	-2	-2	-1	-2	-1	-2	-3	-3	1	-1
1	0.15474	-3	-3	-2	1	-5	-2	0	0	0	-3	-3	-4	-3	4	2	-2	-1	9	1	-4	0	0	1	1	0	-0.397	0.412	1.891	-1.006	-0.59	0.17877	-2	0	1	4	-6	1	4	-4	-2	-5	-5	2	-4	-6	1	-1	-3
1	0.077382	5	-5	-5	-5	-1	-4	-4	-1	-3	-2	2	-4	-1	-3	-1	-2	-3	-5	-4	2	1	0	0	1	0	1.57	-0.146	-0.733	-0.591	-1.302	0.071858	6	-4	-4	-4	0	-4	-4	-3	-4	-4	-4	-4	-1	-5	-4	0	0
1	0.71196	-2	-1	-1	3	-5	2	2	1	0	-2	1	1	2	-4	-1	-1	-2	-5	-4	-4	0	0	1	0	1	-0.259	-3.242	-3.656	1.05	0.302	0.64127	-3	0	3	-3	1	2	-3	1	-3	-3	-2	2	-4	-4	-2	3	3
1	0.23276	-2	-1	1	-1	1	-3	-1	-1	1	0	0	-1	-1	-3	4	0	0	-4	2	-2	1	0	0	0	1	0.421	-1.392	-1.628	0.189	2.081	0.2155	2	-3	-1	0	-3	1	2	-2	-3	0	-1	-3	-3	-1	2	2	1
1	0.099625	-3	-2	-2	3	-6	0	7	-4	-2	-5	-5	-1	-4	-5	-3	-2	-3	-5	-4	-5	0	1	0	1	0	0.113	-0.837	1.477	1.357	-1.453	0.13056	-3	-4	-4	-4	-3	-4	-4	-5	-5	6	-1	-4	-1	-3	-4	-3	4
1	0.40741	-3	0	-3	-3	-6	-1	-2	-4	-3	-5	-5	8	-4	-6	-4	-3	-3	-6	-4	-4	1	0	0	0	1	-0.277	1.648	0.533	1.831	-0.561	0.40066	-1	-5	-3	-3	-4	-5	-5	1	-4	4	2	-5	-1	3	-5	-1	-3
1	0.065568	0	-2	5	3	-5	1	3	-2	-3	-5	-5	0	-4	-5	2	0	-1	-5	-4	-4	1	0	0	1	0	-0.169	0.933	1.299	0.945	0.828	0.072834	-1	-1	-3	-3	-1	0	-1	3	-4	-1	4	1	-1	-2	-3	-3	-3
1	0.18002	-2	-4	-3	-3	-4	-3	-2	-4	-4	-3	-2	-3	-4	-5	8	0	0	-5	-5	-4	0	0	1	0	1	0.421	-1.392	-1.628	0.189	2.081	0.15625	0	-2	1	4	-4	0	2	0	0	-2	-2	-1	-2	-4	0	0	0
1	0.42616	-1	-5	-6	-6	3	-5	-5	-6	-5	-1	5	-5	2	2	-5	-4	-3	-4	-3	0	1	0	0	1	0	1.266	-0.912	-1.505	-1.019	-0.987	0.41715	1	-3	-1	2	-5	1	5	-2	-3	-5	-5	1	-4	-5	-4	0	0
1	0.2154	-3	8	-1	-3	-6	-1	-2	-4	-2	-4	-4	1	-2	-4	-3	-2	-3	-5	-3	-5	1	0	0	1	0	0.44	2.897	1.502	1.538	-0.055	0.24793	-1	5	2	-3	-1	0	-2	-3	2	-3	-3	3	-3	-3	-4	0	-2
1	0.23656	-3	-4	-4	-6	1	-4	-5	-3	-5	-1	2	-5	10	-3	-3	-2	-3	-5	-4	-2	0	0	1	1	0	1.266	-0.912	-1.505	-1.019	-0.987	0.22273	-2	0	2	-4	2	-1	-2	-1	1	-1	-1	0	-2	-1	3	3	0
1	0.29161	0	-2	-3	-5	0	-1	-2	-4	2	2	2	-4	0	0	-5	-4	-1	-1	4	2	1	0	0	1	0	-0.838	1.512	3.097	0.26	0.83	0.28145	4	-4	-1	-4	-1	-3	-3	-1	-4	-2	-1	-3	0	-2	-4	2	0
1	0.20199	-4	-5	-5	-6	-4	-5	-5	-5	-3	4	3	-5	0	5	-5	-4	-3	-3	1	2	0	0	1	1	0	-0.397	0.412	1.891	-1.006	-0.59	0.23492	-3	7	-1	-4	-4	-1	-2	-4	0	-4	-3	0	2	-1	-4	-2	-3
1	0.046168	-1	-5	-2	-6	-2	-4	-5	-3	-1	0	2	-5	3	4	-5	-4	-3	-3	2	4	1	0	0	1	0	1.045	2.064	1.33	-0.384	1.652	0.043698	0	3	-2	2	-4	1	3	-4	1	-4	-3	3	-2	-5	-4	-2	-2
1	0.48748	0	-1	-1	2	-5	2	2	1	0	-5	-5	2	1	-3	1	0	-1	0	-4	-4	0	0	1	0	1	0.113	-0.837	1.477	1.357	-1.453	0.43714	1	-2	-1	-3	-5	-1	-4	0	-4	-2	-5	-2	-4	-1	7	-1	-2
1	0.032557	-3	-2	-5	-5	0	1	-4	-5	-3	3	0	0	5	-4	-5	-3	0	-5	-4	4	0	1	0	1	0	1.242	-1.262	-0.544	-1.337	-0.279	0.038926	-3	1	-3	-2	-5	-2	-1	-5	3	-3	2	-2	-1	2	-5	1	1
1	0.16939	2	-2	0	3	-5	0	3	0	-3	-5	-5	-1	-1	-4	-4	3	-2	-6	-3	-5	0	0	1	0	1	0.67	-2.647	-4.76	-0.228	1.399	0.15823	-1	-2	-1	-2	-5	-2	-3	6	-4	-6	-6	2	-5	-6	-5	-2	-4
1	0.85786	-1	2	-1	3	-4	1	4	-1	0	-4	-3	-1	-3	-4	0	0	0	-4	-4	-4	0	0	1	0	1	-1.474	-0.078	-1.673	0.336	-0.417	0.84089	1	-3	-1	2	-3	2	1	-2	1	0	-3	-1	0	-4	1	1	3
1	0.13303	-1	-1	-1	-1	-2	2	-1	-4	1	-2	-3	2	-2	-3	0	1	4	-5	-1	0	0	1	0	0	1	-0.503	-1.853	-3.005	0.931	-0.179	0.12888	-4	-3	8	-1	-5	-3	-3	-3	-2	-5	-5	-3	-4	-5	-4	-2	-3
1	0.37739	-1	2	4	-3	-1	0	-3	-2	-3	-2	-4	0	3	-5	-4	4	0	-4	-4	-4	1	0	0	1	0	-0.169	0.933	1.299	0.945	0.828	0.36664	-3	-3	-3	-1	0	0	7	-4	-3	-6	-5	-1	-4	-6	-4	0	-3
1	0.99617	-1	2	-1	-1	-4	1	0	-2	-1	-3	-3	6	-2	-4	-2	-1	0	-4	-2	-3	0	0	1	0	1	-0.277	1.648	0.533	1.831	-0.561	0.99616	0	-1	2	-1	-2	-1	-1	-1	-1	-3	-3	-1	-2	-3	-1	5	1
1	0.081731	0	-3	-1	7	-6	-3	-1	-4	-2	-5	-6	-2	-5	0	3	-2	-2	-6	-5	-4	0	0	1	0	1	-0.259	-3.242	-3.656	1.05	0.302	0.062387	-3	-4	0	0	-5	-4	-4	7	-3	-7	-6	-4	-5	-5	-5	-3	-4
1	0.002662	-2	-6	-6	-6	0	-4	-6	-5	-6	2	3	-5	0	-2	-5	-4	-3	-6	-4	6	0	1	0	1	0	1.266	-0.912	-1.505	-1.019	-0.987	0.002491	5	-2	-1	-4	6	-3	-4	-3	-3	-2	-4	-3	-3	-5	-5	1	0
1	0.27226	0	1	0	0	-3	0	1	-3	-1	-2	0	1	2	3	0	0	-2	-3	1	-2	0	0	1	0	1	-0.397	0.412	1.891	-1.006	-0.59	0.27365	2	1	2	2	-3	0	1	-1	1	-4	-3	1	-1	-5	-2	1	0
1	0.62067	0	1	1	1	-4	-3	0	0	-4	-4	-1	0	-4	1	1	0	0	4	2	0	0	0	1	1	0	-0.838	1.512	3.097	0.26	0.83	0.57778	-1	2	0	0	-5	2	0	-2	1	0	-2	2	-4	-1	2	0	0
1	0.97316	0	-2	0	-2	-4	-1	-3	4	-3	-1	-2	-2	-1	-3	2	0	1	-4	-2	-2	0	0	1	1	0	0.908	1.313	2.213	-0.032	0.326	0.97504	-3	0	-3	-2	0	-2	2	0	2	-3	0	-2	2	3	0	-1	-3
1	0.054713	1	-5	-1	-5	8	-3	-5	1	-3	-3	-2	-5	-2	-4	-5	2	3	-6	-4	-2	1	0	0	1	0	0.908	1.313	2.213	-0.032	0.326	0.052372	0	2	1	-1	-1	-2	3	-2	0	-4	0	-1	-2	-1	-5	2	1
1	0.25958	-3	-5	-4	-2	-4	-4	-1	-6	-6	3	-1	-5	-2	-2	-2	-4	1	-4	-4	6	0	1	0	1	0	1.242	-1.262	-0.544	-1.337	-0.279	0.26569	-3	6	-4	-5	-5	-2	-4	-5	-2	-3	2	2	-1	1	-5	-4	-4
1	0.1349	-3	-3	-2	3	-4	-1	5	4	1	-5	-4	-2	-4	-5	-1	-2	-3	-5	-4	-5	1	0	0	0	1	1.045	2.064	1.33	-0.384	1.652	0.12263	1	-3	0	0	1	-3	-3	-3	-3	0	-4	-3	-4	-5	-2	6	-1
1	0.079655	-1	1	0	1	-5	0	1	-3	-2	-5	-5	4	-4	-5	5	-1	-2	-5	-4	-3	1	0	0	0	1	0.421	-1.392	-1.628	0.189	2.081	0.057965	-3	2	5	-1	-4	2	0	-2	2	-3	-4	1	-2	-4	0	1	1
1	0.6857	-2	-3	-3	2	-3	-3	1	-4	-4	3	-1	-3	-1	-3	-4	0	-2	-4	-3	4	0	0	1	1	0	1.242	-1.262	-0.544	-1.337	-0.279	0.68903	-1	-2	-1	0	-4	1	4	1	1	-4	-4	0	-3	2	-3	3	-1
1	0.037589	7	-4	-4	-4	-3	-3	-4	-2	-4	-4	-4	-3	-4	-5	-3	-1	-3	-5	-4	-2	1	0	0	1	0	1.57	-0.146	-0.733	-0.591	-1.302	0.030466	-4	-5	-6	-6	-4	-5	-6	-6	-6	6	3	-5	-1	-1	-5	-5	-2
1	0.49557	3	-3	-3	-2	-2	-2	-1	-2	-4	0	-3	-2	-1	-3	-4	4	1	-5	-4	2	0	0	1	0	1	0.393	0.816	2.131	-1.239	-0.547	0.52513	-3	-1	-1	3	-2	0	-1	-4	0	3	-1	1	0	0	-4	-1	1
1	0.068449	-3	-5	-6	-6	-4	-5	-6	-6	-5	5	5	-5	0	0	-5	-5	-4	2	-3	0	1	0	0	1	0	0.393	0.816	2.131	-1.239	-0.547	0.05347	-1	1	0	-1	1	2	-1	-1	3	0	0	0	0	-2	-2	1	-1
1	0.94752	0	-3	-1	-1	5	0	-3	-1	-1	-2	-1	-3	0	1	1	4	1	-4	-3	-1	0	0	1	1	0	0.67	-2.647	-4.76	-0.228	1.399	0.94418	0	-2	-3	-2	-2	-2	0	-2	-2	-4	-3	-1	-3	0	4	4	1
1	0	0	0	0	0	0	0	0	0	0	0	0	0	0	0	0	0	0	0	0	0	0	0	0	0	0	0	0	0	0	0	0	0	0	0	0	0	0	0	0	0	0	0	0	0	0	0	0	0
1	0.29269	1	-1	0	0	0	-1	0	-1	-2	-1	0	0	-2	-5	3	2	1	-1	-5	-1	0	0	1	0	1	0.421	-1.392	-1.628	0.189	2.081	0.30989	1	-1	1	3	-5	3	2	0	3	-3	-3	0	-2	-3	-2	0	-1
1	0.043795	-4	-3	-1	8	-5	-2	0	-3	-3	-5	-5	-3	-5	-5	-3	-2	-3	-6	-5	-5	0	0	1	1	0	-0.259	-3.242	-3.656	1.05	0.302	0.039866	-3	-3	-4	-5	-3	-2	-4	-4	-3	-1	0	-3	10	-2	-4	-3	-2
1	0.67548	-1	0	0	1	-4	0	0	0	-1	-1	0	0	0	-1	-2	-1	3	0	-3	2	1	0	0	0	1	1.242	-1.262	-0.544	-1.337	-0.279	0.68763	-2	-3	-1	1	-4	1	5	-2	4	-2	-1	-1	-3	-3	0	0	-1
1	0.18709	3	-2	-1	-5	0	-2	-3	-3	1	-3	0	2	3	1	-4	-3	-3	-4	2	2	0	1	0	1	0	-0.277	1.648	0.533	1.831	-0.561	0.20639	3	2	-1	-2	-2	3	-1	-2	-3	-4	-4	2	-2	-5	-2	2	0
1	0.64139	-2	-3	0	-1	0	2	1	-4	-2	0	-3	-1	-2	-3	1	1	5	-5	-3	-2	0	1	0	0	1	0.908	1.313	2.213	-0.032	0.326	0.62318	0	-4	-4	-2	3	-2	-3	-4	-1	2	3	-4	1	1	-4	0	0
1	0.72892	-2	-3	-2	-3	-4	-3	-3	0	-2	-4	-3	-3	-3	-2	2	4	3	-3	5	-3	0	0	1	0	1	0.67	-2.647	-4.76	-0.228	1.399	0.71877	0	-3	-3	-4	6	-3	-4	4	-4	-3	1	-3	-3	-4	-2	3	-1
1	0.005417	-4	8	-3	-4	0	1	-1	-5	-3	-6	-5	1	-4	-6	-5	-2	-4	-5	-4	-5	0	1	0	1	0	0.44	2.897	1.502	1.538	-0.055	0.007337	5	-4	-4	-5	5	-4	-4	-1	-4	-1	-3	-4	-3	-4	-4	0	0
1	0.14191	0	-1	-2	-1	-4	0	3	-1	0	-2	-1	0	-2	1	3	1	-1	1	-2	-2	1	0	0	0	1	0.113	-0.837	1.477	1.357	-1.453	0.12691	-1	-1	3	4	-3	0	0	-2	1	-2	-1	-2	0	-2	-4	1	0
1	0.63281	-3	-3	-5	-6	-4	-4	-5	-5	-5	-1	6	-4	3	2	-5	-4	-3	-3	-3	-2	1	0	0	1	0	1.266	-0.912	-1.505	-1.019	-0.987	0.61657	0	-1	2	-1	0	3	1	-4	1	-2	-3	3	1	-4	-4	0	1
1	0.60459	-1	-2	0	3	-2	-1	0	-1	-3	-1	0	-1	-1	-1	-3	0	4	-3	-2	0	0	0	1	0	1	0.908	1.313	2.213	-0.032	0.326	0.58332	-1	-1	2	1	-2	1	-1	1	0	-2	-1	2	-2	-3	-1	1	0
1	0.83025	-1	2	0	1	0	-1	2	-1	0	-2	-2	1	0	-1	1	0	-1	-5	0	-2	0	0	1	0	1	0.44	2.897	1.502	1.538	-0.055	0.81486	-1	0	1	0	-4	0	0	-1	1	-4	-2	1	-4	-4	1	3	1
1	0.13358	5	-3	-2	-1	-4	2	1	-2	0	-2	-1	0	-3	-4	-3	1	-3	-4	-1	-2	1	0	0	0	1	1.57	-0.146	-0.733	-0.591	-1.302	0.14177	-3	-1	-5	-5	-1	-3	-5	-5	-4	3	4	-4	3	3	-5	-4	-2
1	0.07823	3	-1	-4	-3	-1	-1	5	-3	0	-2	-3	-1	1	-3	-4	-2	-1	-5	-1	-1	1	0	0	1	0	-0.397	0.412	1.891	-1.006	-0.59	0.080838	-5	-5	-5	-6	-6	-5	-6	-6	-1	-4	-2	-5	-4	6	-6	-5	-5
1	0.062451	-2	-3	-3	-3	-6	-4	-5	7	-4	-7	-7	-4	-6	-2	-5	-3	-4	-4	-6	-6	1	0	0	0	1	1.045	2.064	1.33	-0.384	1.652	0.052903	-3	-4	2	7	-6	-3	0	-2	3	-4	-5	-2	-2	-6	-3	-1	-3
1	0.15052	-2	-2	-1	-3	0	0	-2	-4	-3	-3	-4	0	-2	-3	-1	1	6	-5	-4	-2	0	0	1	0	1	0.908	1.313	2.213	-0.032	0.326	0.15661	0	0	3	6	0	1	-1	-2	0	-5	-5	1	-5	-6	-4	-1	-2
1	0.54627	-4	-2	-1	3	-6	1	7	-3	-3	-6	-6	-1	-5	-6	-4	-2	-3	-6	-5	-5	1	0	0	0	1	0.113	-0.837	1.477	1.357	-1.453	0.54292	-3	-4	-4	-4	-2	-4	-5	-6	0	0	4	-5	3	0	-5	-3	-2
1	0.11835	4	0	-1	-4	-3	-1	-3	-1	-4	-2	0	-1	5	-3	-4	2	1	-5	-4	-1	0	0	1	1	0	1.57	-0.146	-0.733	-0.591	-1.302	0.13154	6	-4	-3	-4	-3	-3	-3	1	-4	-3	-4	-3	-3	-5	-2	-1	-2
1	0.67055	0	3	-2	-2	-3	0	-1	-3	-3	-4	-4	6	-3	-5	-3	-1	0	-5	-2	-3	0	0	1	0	1	-0.277	1.648	0.533	1.831	-0.561	0.65407	-3	-4	-2	-4	-1	-3	-3	-4	-4	-3	-4	-3	-3	-5	6	-1	5
1	0.80534	2	-1	-1	3	-4	1	4	-2	-2	-4	-4	-1	-3	-3	1	1	-1	-2	-4	-3	1	0	0	0	1	-0.259	-3.242	-3.656	1.05	0.302	0.79664	2	-2	0	3	-4	0	4	-1	-2	-4	-3	-1	-3	-4	-3	2	-1
1	0.64826	-2	-1	-1	2	-5	1	6	-3	-2	-4	-4	0	-3	-5	-3	-1	-2	-5	-4	-3	1	0	0	0	1	0.113	-0.837	1.477	1.357	-1.453	0.62043	0	-1	0	3	-4	-1	1	-3	7	-3	-4	-1	-3	0	-3	0	-2
1	0.30812	-1	-4	-2	-4	-5	-3	-4	2	-4	-5	-5	-3	-5	-6	8	0	-1	-6	-5	-5	0	0	1	0	1	0.421	-1.392	-1.628	0.189	2.081	0.24529	-3	-5	-5	-5	-4	-4	-3	-4	-5	6	0	-5	5	-3	0	-3	-2
1	0.13886	-4	-5	-6	-6	-4	-5	-6	-6	-6	6	4	-5	2	1	-6	-5	-3	-5	-4	0	1	0	0	1	0	1.266	-0.912	-1.505	-1.019	-0.987	0.11206	0	-1	3	4	-4	-1	1	-2	-2	-4	0	-1	-3	-3	-4	2	-1
1	0.1101	-2	0	2	1	-5	0	0	-1	0	0	-1	1	0	-1	-1	0	0	4	0	-1	1	0	0	0	1	-0.259	-3.242	-3.656	1.05	0.302	0.107	-1	-1	1	0	0	0	1	-2	1	0	-1	2	0	1	-3	-1	0
1	0.090879	-2	-5	-5	-6	1	-3	-3	-5	-5	1	3	-5	5	1	-3	-2	-3	6	-3	3	1	0	0	1	0	1.242	-1.262	-0.544	-1.337	-0.279	0.074377	-1	1	1	-4	0	-1	-2	-3	-2	1	1	-1	2	-2	-4	1	1
1	0.43536	6	-3	1	-3	-2	-3	-3	-1	-3	-3	-3	-2	-3	-4	-3	0	-2	-5	-3	-2	1	0	0	1	0	1.57	-0.146	-0.733	-0.591	-1.302	0.4565	-1	-1	-2	-2	-4	7	0	-2	-1	-2	-1	0	4	-4	-3	-2	-3
1	0.13481	-2	-2	7	0	-3	-1	-1	0	2	-3	-3	-2	-2	-3	-3	0	-1	-3	-1	-3	1	0	0	1	0	-0.169	0.933	1.299	0.945	0.828	0.14257	-1	-2	-2	-1	1	-1	-2	-2	-3	3	2	-3	7	0	-3	-3	-1
1	0.10408	1	-5	-5	-5	-4	-4	-5	-5	-4	2	3	-5	1	6	-5	-3	-3	-1	1	-1	1	0	0	1	0	-0.397	0.412	1.891	-1.006	-0.59	0.10731	-2	-1	-1	-2	-5	8	0	-4	1	-1	-2	0	-2	-5	-3	-2	-2
1	0.51232	2	1	-1	0	0	0	1	-2	1	-2	-2	3	1	-4	-2	1	0	-5	-1	-1	1	0	0	0	1	1.045	2.064	1.33	-0.384	1.652	0.55841	0	-1	-4	-4	1	-4	-1	0	1	1	1	-1	1	0	-4	-1	-1
1	0.33073	-4	-4	3	7	0	-1	-1	-4	-3	-4	-5	-2	-4	-6	-2	-2	-3	-7	-5	-2	0	0	1	0	1	-0.259	-3.242	-3.656	1.05	0.302	0.29753	-2	0	-2	-3	-5	-2	-2	-4	-1	-1	-3	-1	-3	-4	7	0	-2
1	0.59834	-5	-6	-2	-6	-5	-6	-6	-6	-3	-2	0	-6	0	9	-6	-5	-5	0	1	0	0	0	1	1	0	-0.397	0.412	1.891	-1.006	-0.59	0.58666	-3	-4	-5	-6	-4	-4	-5	-6	-5	4	3	-2	7	-2	-6	-3	-4
1	0.61629	-1	-5	-3	-6	-4	-4	-5	-4	-5	3	3	-3	2	5	-4	-3	-1	-4	-2	2	0	0	1	1	0	1.266	-0.912	-1.505	-1.019	-0.987	0.57699	1	-3	-2	-4	-4	-4	-4	2	-3	0	-2	-4	-2	-1	-3	0	5
1	0.23184	-1	-2	-2	-1	-5	-2	1	0	-1	-6	-6	-1	-5	-6	7	0	-2	-6	-5	-5	0	0	1	0	1	0.421	-1.392	-1.628	0.189	2.081	0.24284	-3	-3	-6	-6	-4	-5	-5	-6	-6	3	-2	-5	-1	-4	-4	-5	-3
1	0.99578	1	0	-2	-4	3	-3	-3	1	1	-3	-3	-3	-1	-3	-2	4	0	-5	1	-1	0	0	1	1	0	0.67	-2.647	-4.76	-0.228	1.399	0.9957	-1	5	0	-2	-4	-1	-2	2	-2	-3	-3	-1	0	-4	-3	2	-1
1	0.019212	-1	-2	1	-2	-3	1	-1	0	0	0	0	-2	2	4	-5	0	-1	2	0	-2	1	0	0	0	1	-0.397	0.412	1.891	-1.006	-0.59	0.01875	4	-4	-3	-4	-4	-4	-4	6	-4	-5	-5	-3	-4	-5	-4	1	-3
1	0.20911	1	0	-3	-2	-3	0	-1	-2	1	3	-1	0	-2	-4	-4	3	0	-5	-3	0	1	0	0	1	0	0.67	-2.647	-4.76	-0.228	1.399	0.20896	2	-5	-3	-4	-4	-4	-4	7	-4	-6	-6	-4	-5	-6	-4	-2	-4
1	0.25815	-1	-4	-2	-3	3	-4	-4	-4	-5	0	-3	-3	-3	-4	-4	1	5	-5	-4	3	0	1	0	1	0	0.908	1.313	2.213	-0.032	0.326	0.2256	-3	-2	-4	-5	-3	-4	-1	-6	-2	5	1	-3	-1	1	-3	-4	-2
1	0.09214	-4	-2	-2	-3	-5	-2	-2	-4	10	-5	-5	-3	-4	-3	-4	-3	-3	-4	0	-5	0	1	0	1	0	-1.474	-0.078	-1.673	0.336	-0.417	0.0963	-3	-4	-4	-4	6	-3	-3	-4	-4	-4	-3	-3	-2	-5	8	-3	-2
1	0.27526	1	1	5	1	-3	1	1	-2	-2	-4	-4	2	-3	-4	-3	1	0	-5	-4	-3	0	0	1	0	1	-0.277	1.648	0.533	1.831	-0.561	0.26429	-1	-1	2	-1	-1	-1	-1	-3	2	0	-3	4	0	-1	-3	-1	-1
1	0.17797	-3	4	-1	-2	-4	0	1	-3	-1	-4	-4	5	-3	-3	-2	-2	-1	-4	-3	-4	0	0	1	0	1	-0.277	1.648	0.533	1.831	-0.561	0.15571	-4	-4	-5	-4	-4	-3	-4	-5	2	6	-1	-4	-2	-1	-5	-4	-3
1	0.12467	-2	-2	-2	-5	-3	-3	-3	-1	-1	-3	-1	-4	-2	1	-6	-2	-3	2	8	-2	0	0	1	1	0	-0.838	1.512	3.097	0.26	0.83	0.093938	-5	-5	-3	-6	-2	-5	-6	-6	-3	-1	5	-5	-1	3	-6	-5	-4
1	0.015719	-2	-4	2	0	-2	-3	-3	-3	2	0	-4	-3	-2	-3	-4	2	6	-5	-2	-2	1	0	0	1	0	0.908	1.313	2.213	-0.032	0.326	0.02141	-2	-1	-1	3	2	-1	-1	-2	3	-4	-1	0	-2	5	-5	-1	-4
1	0.3197	-2	-3	-4	-4	0	-4	-4	5	-5	2	-2	-3	3	-1	-1	-2	0	-5	-5	0	0	0	1	1	0	1.045	2.064	1.33	-0.384	1.652	0.34658	-1	-1	0	-1	-4	1	5	-4	-2	-2	-4	2	-2	-5	-2	0	-2
1	0.60845	-3	7	-2	-3	-5	0	-1	-4	-1	-4	-3	1	-3	-4	-3	-2	-2	-4	-3	-4	0	0	1	0	1	0.44	2.897	1.502	1.538	-0.055	0.54828	-2	-1	-1	0	-5	1	7	-3	-1	-5	-4	0	-3	-5	-2	-1	-2
1	0.040076	2	-5	-5	-4	-4	-5	-5	-3	-6	3	1	-5	-2	-3	-5	-3	0	-5	-2	5	0	0	1	1	0	1.242	-1.262	-0.544	-1.337	-0.279	0.042939	-3	-5	-5	-4	-6	-3	-4	-5	-1	-5	-5	-4	-5	-5	8	-3	-3
1	0.082049	6	-4	-3	-4	-3	-3	-3	-2	-4	-4	-4	-3	-3	-5	-3	2	-2	-5	-4	-2	1	0	0	1	0	1.57	-0.146	-0.733	-0.591	-1.302	0.085495	-4	-4	-5	-6	-4	-3	-5	-6	0	3	6	-5	1	-2	-5	-5	-3
1	0.066736	-2	-5	-5	-5	0	-4	-5	-5	-5	1	-1	-5	-1	-3	-5	-3	0	-5	-4	7	0	1	0	1	0	1.242	-1.262	-0.544	-1.337	-0.279	0.045243	-3	-5	-5	-6	-3	-5	-5	-6	-5	6	1	-4	-1	0	-5	-4	-3
1	0.10725	3	2	-2	-4	-4	-2	-2	4	-1	-4	-4	-1	-2	-3	-4	-1	-2	4	0	-4	1	0	0	1	0	-0.277	1.648	0.533	1.831	-0.561	0.099534	5	-4	-4	-5	6	-3	-4	-3	-4	0	0	-4	0	-3	-4	0	-2
1	0.17465	1	2	-1	2	-5	3	2	-1	-2	-5	-5	4	-4	-5	-3	-1	-2	-5	-4	-3	1	0	0	1	0	0.44	2.897	1.502	1.538	-0.055	0.17481	3	2	1	0	-4	2	1	0	2	-4	-3	2	-2	-5	-3	-1	-1
1	0.27769	-2	-2	0	-1	-5	-2	-2	6	-1	-4	-5	-2	-4	-5	-3	-1	-3	-2	-5	-4	0	0	1	0	1	1.045	2.064	1.33	-0.384	1.652	0.29297	-2	3	0	-1	-1	0	0	-1	1	3	-1	2	-1	-3	-1	-2	-2
1	0.04517	-1	7	-1	-2	-3	-1	-2	-3	-1	-4	-2	0	-1	-4	-4	-2	-2	-5	-3	-4	1	0	0	1	0	0.44	2.897	1.502	1.538	-0.055	0.042601	5	-4	-4	-1	-3	-4	-3	-2	-4	1	1	-3	2	-2	-4	-2	-1
1	0.45508	-3	-2	3	-2	-4	-2	-3	-3	0	-3	-1	0	-3	4	-4	-1	-1	0	6	-3	1	0	0	1	0	-0.838	1.512	3.097	0.26	0.83	0.49163	-2	1	-1	3	-4	1	1	-1	-2	-4	-3	4	-2	-4	-2	2	-1
1	0.24837	-4	-3	-3	-4	-5	-2	-3	-5	8	-3	-4	-4	-4	1	-5	-4	-4	-2	7	-4	1	0	0	1	0	-0.838	1.512	3.097	0.26	0.83	0.21332	-4	-5	-5	-6	1	-5	-5	-5	-4	-3	-1	-5	-1	8	-4	-1	-4
2	0.3454	-1	0	4	-2	-4	1	1	-3	1	-2	-4	0	1	-4	-4	2	3	-5	-4	-2	1	0	0	1	0	-0.169	0.933	1.299	0.945	0.828	0.31573	-3	3	1	-1	-5	3	0	-2	1	-3	-1	3	1	-3	-4	-1	1
2	0.2798	-2	0	2	2	-5	4	1	-2	3	-5	-2	0	-1	1	-3	-1	-1	-5	2	-3	1	0	0	0	1	-0.503	-1.853	-3.005	0.931	-0.179	0.26456	-2	-3	-2	-5	-1	-2	-3	-2	-4	3	3	0	4	0	-5	-1	1
2	0.56164	-1	1	2	-2	-4	0	0	-2	-2	1	-1	2	-1	-3	-2	1	3	0	-2	-1	0	0	1	0	1	0.908	1.313	2.213	-0.032	0.326	0.58365	1	-1	1	-2	-2	-1	1	0	-2	-1	-2	-1	-4	2	-2	1	0
2	0.43193	-3	-5	-5	-5	-4	-2	-5	-5	-5	5	3	-4	2	-3	-5	-1	-1	-4	0	3	1	0	0	1	0	0.393	0.816	2.131	-1.239	-0.547	0.44969	0	1	0	1	-5	1	2	1	-1	-2	-2	2	-4	-5	-4	1	-1
2	0.33863	0	-1	-1	-3	0	-1	-2	-1	6	0	-3	-1	-2	1	-4	0	0	3	4	0	1	0	0	1	0	-1.474	-0.078	-1.673	0.336	-0.417	0.34861	-1	0	1	4	-5	2	3	-2	-1	-4	-4	1	-1	-1	-4	0	1
2	0.24316	0	-2	-5	-5	-4	-4	-5	-5	-5	2	5	-4	2	0	-5	-4	0	-4	-3	1	1	0	0	1	0	1.266	-0.912	-1.505	-1.019	-0.987	0.22096	1	3	0	-2	2	3	-2	-3	4	-3	-1	2	-1	-3	-4	-2	-2
2	0.21188	-4	-4	6	-1	3	-3	-1	-4	-3	-5	-5	-3	-4	2	-1	-1	2	-4	4	-4	0	0	1	1	0	-0.169	0.933	1.299	0.945	0.828	0.2327	-3	-2	-3	-4	1	2	-3	-5	-4	-3	-3	-3	-3	-5	-2	0	6
2	0.54197	1	-3	1	5	-4	-2	2	-1	-3	0	-1	-2	-3	-4	-3	0	-2	-4	-4	-1	0	0	1	0	1	-0.259	-3.242	-3.656	1.05	0.302	0.52875	-2	0	0	4	-4	1	5	-3	-2	-3	-4	0	-3	-4	-3	-1	1
2	0.16443	2	-3	-2	-3	3	-3	-3	4	-3	-2	-3	-3	-3	1	0	1	-2	-3	-3	1	0	1	0	1	0	1.045	2.064	1.33	-0.384	1.652	0.15668	-1	-3	-3	-4	-3	-3	-3	1	1	-3	-2	-3	-2	5	-4	0	-3
2	0.25395	-1	2	-1	3	0	-1	3	-3	-1	-3	-3	5	-2	-6	-4	0	-2	-6	-5	-4	0	0	1	0	1	-0.259	-3.242	-3.656	1.05	0.302	0.23059	-1	2	1	0	-3	-2	0	-1	0	-2	-2	3	-3	-4	-3	3	-1
2	0.10966	-2	-5	-4	-3	-4	-3	-4	-3	-3	1	3	-5	3	5	-5	-3	-2	-3	2	1	1	0	0	1	0	0.393	0.816	2.131	-1.239	-0.547	0.081473	-2	2	-3	-2	-3	2	5	-1	-1	-4	0	2	-2	-4	-3	-3	-3
2	0.13065	-2	-5	-4	-5	-4	-3	-4	-5	-3	1	3	-5	3	6	-5	-3	-3	0	2	1	1	0	0	1	0	1.266	-0.912	-1.505	-1.019	-0.987	0.10036	-2	2	-3	-2	-2	2	5	0	-1	-4	-1	2	-2	-4	-2	-2	-3
2	0.092789	-2	-3	-2	-3	-6	-4	-5	7	-3	-7	-7	-5	-6	-2	-5	-2	-4	-3	-6	-6	1	0	0	0	1	1.045	2.064	1.33	-0.384	1.652	0.067329	-3	-3	2	7	-6	-3	1	-2	3	-5	-5	-2	-2	-6	-4	-1	-3
2	0	0	0	0	0	0	0	0	0	0	0	0	0	0	0	0	0	0	0	0	0	0	0	0	0	0	0	0	0	0	0	0	0	0	0	0	0	0	0	0	0	0	0	0	0	0	0	0	0
2	0.013352	-2	-5	-3	-4	-5	-4	-4	7	-4	-6	-6	-4	-5	-6	-4	-2	-4	-5	-5	-6	0	0	1	1	0	1.045	2.064	1.33	-0.384	1.652	0.013436	-3	-4	-4	-4	-5	-4	-3	-4	-5	-5	-5	-3	-5	-6	9	-3	-2
2	0.054737	5	-3	0	-3	-4	-1	-3	2	4	-4	-4	-3	-2	-5	-4	2	-2	-5	-3	-3	1	0	0	1	0	1.045	2.064	1.33	-0.384	1.652	0.054747	-3	-2	-3	-1	-6	2	7	-4	-2	-6	-5	-1	-4	-6	-3	-2	-3
2	0.031489	-2	-5	-5	-6	0	-5	-5	-6	-6	5	-1	-5	-1	-3	-5	-4	-3	-5	-4	6	0	1	0	1	0	1.242	-1.262	-0.544	-1.337	-0.279	0.028223	-3	-3	-2	3	-6	0	7	-4	-2	-6	-5	-2	-5	-6	-4	-2	-3
2	0.008931	2	1	0	-2	-3	-1	-2	-3	-3	-3	-4	-1	-3	-2	-3	1	5	-4	-1	-1	0	0	1	0	1	0.908	1.313	2.213	-0.032	0.326	0.009293	-3	-4	-4	-6	-4	-4	-5	-6	-2	1	6	-4	0	0	-1	-5	-3
2	0.1362	-1	0	-3	-3	-4	-2	-2	-4	-4	-4	-4	0	-4	-4	8	-1	-2	-5	-4	-4	0	0	1	0	1	0.421	-1.392	-1.628	0.189	2.081	0.11682	-3	-3	7	3	-5	-2	-2	0	0	-5	-5	-1	-4	-5	-4	-1	-2
2	0.019006	2	-2	-2	-2	0	0	1	-2	-3	-3	-3	0	-3	-4	-3	3	4	-5	-3	-1	0	1	0	0	1	0.908	1.313	2.213	-0.032	0.326	0.022502	1	-4	-5	-5	-2	-3	-4	-5	-2	5	-1	-4	1	-1	-4	-3	-1
2	0.1098	-1	0	-3	-4	8	-3	-4	-2	-1	1	-3	1	-3	-1	1	1	1	-5	-2	-1	0	1	0	1	0	0.67	-2.647	-4.76	-0.228	1.399	0.11327	-4	-5	-5	-6	-1	-5	-5	-5	-3	-2	-1	-5	-2	9	-6	-4	-4
2	0.49459	-2	-2	-4	-4	-2	-3	-4	-5	-4	5	0	-3	0	-1	-4	-3	-1	-4	-2	4	0	1	0	1	0	1.242	-1.262	-0.544	-1.337	-0.279	0.35257	-1	-3	-1	-2	-4	-3	-3	7	-3	-5	-5	-3	-4	-4	-3	-1	-3
2	0.64143	1	0	-1	-2	-2	2	-1	-3	-2	-4	-3	4	-3	-4	5	-1	-2	-5	-3	-3	1	0	0	0	1	-0.277	1.648	0.533	1.831	-0.561	0.57337	-3	7	-2	-3	-5	0	-1	-4	-2	-5	-4	2	-3	-4	-4	-2	-3
2	0.055746	-1	-2	-2	-2	-5	0	0	-2	-4	-5	-4	0	-4	-5	7	-1	-3	-6	-1	-3	0	0	1	0	1	0.421	-1.392	-1.628	0.189	2.081	0.044307	2	-1	0	2	-5	0	4	-4	1	-5	-5	2	-3	-5	2	0	-1
2	0.020173	0	-2	-2	-5	-2	-1	-2	-5	4	1	2	0	2	0	-5	-3	-1	-3	5	-2	1	0	0	1	0	-0.838	1.512	3.097	0.26	0.83	0.022529	-2	-5	-5	-6	1	-5	-5	-4	-4	0	1	-5	3	8	-5	-4	-4
2	0.042915	-4	-4	-5	-6	-5	-4	-5	-6	0	-4	-4	-4	-3	2	-6	-4	-4	0	9	-4	0	1	0	1	0	-0.838	1.512	3.097	0.26	0.83	0.0331	1	-4	-5	-6	-2	-4	-5	-2	-5	2	4	-4	7	-2	-5	-2	-2
2	0.14069	-3	4	-1	-1	-4	-1	1	-3	-1	-4	-3	5	-3	-2	-2	-1	0	-4	-3	-3	0	0	1	0	1	-0.277	1.648	0.533	1.831	-0.561	0.13065	-3	-4	-5	-4	-4	-3	-4	-5	2	5	-1	-4	-2	-1	-5	-4	-3
2	0.034357	-2	-1	-1	-5	-4	-3	-3	-1	0	-3	-1	-3	-2	1	-5	-2	-3	2	8	-2	0	0	1	1	0	-0.838	1.512	3.097	0.26	0.83	0.033721	-4	-5	-1	-6	-1	-5	-5	-6	-3	-1	5	-5	-1	3	-6	-5	-4
2	0.090203	-3	5	-1	-2	1	2	0	-4	-3	-2	-3	4	-3	-5	-2	-2	1	-6	-4	-3	0	0	1	0	1	0.44	2.897	1.502	1.538	-0.055	0.089221	-3	0	6	1	-4	0	-1	2	3	-6	-6	1	-4	-5	-3	-1	-3
2	0.021308	7	-4	-4	-4	-3	-3	-3	-2	-4	-4	-4	-3	-4	-5	-3	-1	-3	-5	-4	-2	1	0	0	1	0	1.57	-0.146	-0.733	-0.591	-1.302	0.016109	-4	-5	-6	-6	-4	-5	-6	-6	-6	6	4	-5	-1	-2	-5	-5	-3
2	0.036969	-3	-2	-1	1	-2	0	7	-3	-3	-6	-6	0	-5	-6	-4	-1	-3	-6	-5	-5	1	0	0	0	1	0.113	-0.837	1.477	1.357	-1.453	0.03132	-4	-4	0	7	-6	0	4	-4	-3	-6	-6	-2	-5	-6	-4	-3	-4
2	0.04639	-2	-1	-1	3	2	0	-1	-2	3	-4	-2	0	-2	5	-5	-1	-4	1	3	-4	1	0	0	1	0	-0.838	1.512	3.097	0.26	0.83	0.059954	-4	-2	1	-4	-4	1	-3	-5	10	-3	-2	-3	-2	1	-5	-3	-3
2	0.2082	0	0	1	0	-2	-1	0	-2	-2	1	1	0	1	1	-2	0	0	-1	0	0	1	0	0	1	0	1.242	-1.262	-0.544	-1.337	-0.279	0.21239	0	0	-1	-2	-2	1	-2	-1	1	0	0	-1	3	1	-3	0	-1
2	0.059383	-4	-1	0	7	-3	-2	-1	-3	-2	-5	-5	-2	-5	-6	-4	-1	-4	-6	-3	-1	0	0	1	1	0	-0.259	-3.242	-3.656	1.05	0.302	0.041142	0	-5	-5	-6	-4	-4	-5	-4	-5	1	4	-3	2	-2	-5	-3	-3
2	0.1723	-1	-2	-5	-6	-2	-5	-5	-6	-5	4	2	-4	1	4	-4	-3	2	-4	0	2	1	0	0	1	0	0.393	0.816	2.131	-1.239	-0.547	0.094271	-1	-3	-3	-5	4	-1	-4	-2	-1	0	1	-2	-2	1	0	4	1
2	0.094271	-1	-3	-3	-5	4	-1	-4	-2	-1	0	1	-2	-2	1	0	4	1	-1	-2	-2	1	0	0	1	0	0.67	-2.647	-4.76	-0.228	1.399	0.050367	2	-2	-4	-5	-4	-4	-5	-3	-3	1	2	-4	-1	-1	0	2	-1
2	0.23283	-2	-4	3	1	-3	-3	-3	0	-4	-3	-5	-3	-4	-5	-3	3	5	-6	-4	-4	0	0	1	1	0	0.908	1.313	2.213	-0.032	0.326	0.16555	-5	-6	-6	-6	-5	-6	-6	-6	-4	-1	1	-6	-1	9	-6	-5	-5
2	0.015739	0	-4	-3	-5	3	3	-4	-2	1	0	3	-4	-2	1	-3	-1	1	1	-3	1	1	0	0	1	0	-0.503	-1.853	-3.005	0.931	-0.179	0.016287	-1	-5	-6	-6	-4	-2	-5	-5	-6	2	5	-5	1	2	-5	-3	-2
2	0.22521	-2	-4	-5	-3	-5	-2	-4	-5	-5	-4	-5	-4	-5	-2	8	-2	-3	-6	-2	-3	0	0	1	1	0	0.421	-1.392	-1.628	0.189	2.081	0.22816	-1	-3	7	-1	-5	-1	-2	0	1	-5	-6	-1	-5	-2	-4	0	0
2	0.008817	-3	-4	1	-3	1	-3	-3	-3	-3	-2	4	-4	2	-3	-4	4	-2	-5	-3	-3	1	0	0	1	0	0.67	-2.647	-4.76	-0.228	1.399	0.006023	-4	-5	-6	-6	-4	-5	-6	-6	-5	2	6	-5	0	0	-6	-5	-4
2	0.016805	0	-4	-5	-5	1	-4	-5	-3	-5	3	2	-5	-1	1	-2	-1	1	-5	-3	3	1	0	0	0	1	1.242	-1.262	-0.544	-1.337	-0.279	0.01713	2	-4	-4	-5	0	-4	-4	-1	-4	1	3	-4	-1	2	-4	0	0
2	0.20012	-1	6	-2	-3	-5	2	-1	-4	-2	-4	-4	4	-3	-5	-4	-2	-2	-5	-4	-4	1	0	0	1	0	0.44	2.897	1.502	1.538	-0.055	0.22102	-3	-3	-4	-4	-4	4	-3	-5	-2	1	5	-3	3	-2	-4	-3	-2
2	0.39321	0	-3	-1	-2	-1	-2	-2	-2	-1	-4	-4	-2	-3	-4	-3	7	0	-5	-4	-4	0	0	1	0	1	0.67	-2.647	-4.76	-0.228	1.399	0.34048	-2	-4	-5	-5	-3	-4	-4	-5	-5	1	-1	-4	-1	-3	-4	-4	-2
2	0.12189	-4	-3	0	8	-5	-2	0	-3	-3	-5	-5	-2	-5	-5	-3	-2	-3	-6	-5	-5	1	0	0	0	1	-0.259	-3.242	-3.656	1.05	0.302	0.11549	-2	0	-1	-2	-4	8	0	-4	-1	-3	-3	0	-2	-5	-3	-2	-2
2	0.090818	-3	-4	-5	-5	-3	-4	-5	-6	-5	2	6	-4	2	0	-5	-4	-3	-3	-1	-1	1	0	0	1	0	1.266	-0.912	-1.505	-1.019	-0.987	0.086909	4	0	-2	-2	-3	0	3	-2	-3	-3	-4	2	-3	-4	-3	0	1
2	0.086028	-4	-3	0	8	-5	-2	0	-3	-3	-5	-6	-3	-5	-5	-3	-2	-3	-6	-5	-5	0	0	1	1	0	-0.259	-3.242	-3.656	1.05	0.302	0.085929	-2	-2	-3	-3	-5	-2	-2	-4	-4	-4	-4	1	-4	-5	8	-1	-2
2	0.073146	-1	-4	-5	-5	-3	-4	-4	-5	-5	3	1	-4	-1	-2	-3	-4	-2	-5	-3	6	0	1	0	1	0	1.242	-1.262	-0.544	-1.337	-0.279	0.074735	-3	-3	2	7	-5	-2	0	-3	-2	-5	-5	-2	-5	-5	-2	-2	-3
2	0.10205	-2	3	3	4	-4	-2	-1	-2	2	-5	-5	-1	-4	-5	-3	3	-2	-5	-4	-4	0	0	1	0	1	0.67	-2.647	-4.76	-0.228	1.399	0.10731	3	-3	-1	-1	-3	-2	-1	0	-3	-4	-4	-2	-3	-5	2	5	0
2	0.21638	-3	-2	7	3	-5	1	1	-2	-2	-3	-4	0	-4	-5	-4	-1	-2	1	-4	-5	0	0	1	1	0	-0.169	0.933	1.299	0.945	0.828	0.16349	-1	-4	-4	-5	-4	-4	-5	-5	-5	4	1	-4	7	-2	-5	-3	0
2	0.1854	-1	0	-2	-3	-3	-2	-3	-3	-3	-5	-5	-2	-4	-5	-3	7	0	-5	-4	-4	0	0	1	1	0	0.67	-2.647	-4.76	-0.228	1.399	0.19656	2	-3	3	-2	-4	0	3	-1	-3	-2	-4	-2	0	-1	-4	4	-2
2	0.004563	-2	-4	-5	-5	-3	-5	-5	-3	-3	-2	0	-5	-1	8	-5	-4	-4	-1	1	0	0	1	0	1	0	-0.397	0.412	1.891	-1.006	-0.59	0.003835	-4	-5	-5	-5	-4	-5	-5	-5	-3	-2	-2	-5	-2	9	-5	-3	-4
2	0.10474	-2	-2	2	6	-6	-1	2	-4	3	-5	-5	1	-5	-5	-4	-1	-3	-6	-4	-5	1	0	0	0	1	-0.259	-3.242	-3.656	1.05	0.302	0.13301	1	6	0	-3	-5	-1	-2	-4	3	-5	-2	3	-2	-4	-4	-1	-3
2	0.55174	1	-2	-1	-1	0	-2	-2	1	-2	-2	0	-1	-2	-2	-1	4	1	-3	-3	-2	0	0	1	1	0	0.67	-2.647	-4.76	-0.228	1.399	0.54786	2	0	-2	-2	-2	-2	-2	0	-1	0	0	-1	-1	-2	1	2	-1
2	0.67364	2	-1	-1	-3	6	-1	-3	0	-3	1	-1	-1	-2	-3	-3	3	1	-4	-3	-2	1	0	0	1	0	-1.02	-0.255	-0.862	-1.343	0.465	0.66965	2	3	0	-3	4	0	-2	0	0	0	-1	-2	-2	-1	1	-1	-1
2	0.7574	2	3	-1	-1	-3	3	-1	-1	-1	-3	-2	0	-2	0	-2	2	-1	-3	0	-3	0	0	1	0	1	-0.503	-1.853	-3.005	0.931	-0.179	0.77249	2	2	1	-2	-3	-1	-1	-1	1	-1	-1	2	-2	-2	-2	1	2
2	0.59494	-1	1	1	1	0	2	2	-1	0	-2	-2	2	-4	-1	-4	-1	0	-5	-1	0	1	0	0	0	1	0.113	-0.837	1.477	1.357	-1.453	0.58442	-1	0	1	0	3	1	0	-1	-4	0	-1	0	2	1	0	0	0
2	0.21586	-2	-3	-2	-1	-3	-3	-5	-5	-1	3	3	-1	4	1	1	-2	-2	-5	-1	0	1	0	0	1	0	0.393	0.816	2.131	-1.239	-0.547	0.15216	-4	-5	-6	-6	-4	-5	-6	-6	-6	4	5	-5	3	3	-6	-5	-2
2	0.17375	5	-4	-5	-5	4	-3	-4	-3	-3	-1	-1	-4	-1	0	-4	-2	-3	-2	5	0	0	0	1	1	0	-0.838	1.512	3.097	0.26	0.83	0.20254	-3	-5	-6	-5	-1	-5	-5	-6	-6	0	-2	-5	-1	-4	-5	-4	-3
2	0.41408	-2	-5	-5	-5	-4	-2	-3	-6	-5	4	0	-4	0	-1	-3	-3	1	-5	-2	5	0	0	1	0	1	1.266	-0.912	-1.505	-1.019	-0.987	0.37953	-1	-1	-1	0	-4	-2	-1	-3	-4	-4	-4	-2	-4	-4	2	6	1
2	0.15296	-3	-5	-6	-7	-4	-5	-6	-7	-6	1	6	-5	0	-2	-5	-5	-4	-5	-4	0	1	0	0	1	0	1.266	-0.912	-1.505	-1.019	-0.987	0.14285	-3	-5	-6	-6	-4	-5	-6	-6	-6	3	1	-5	1	-3	-5	-5	-3
2	0.29639	1	-3	3	3	1	-2	-1	-2	-3	-4	-5	-1	-4	-3	-4	4	1	-6	-1	-4	0	0	1	1	0	1.57	-0.146	-0.733	-0.591	-1.302	0.28521	-5	-5	-5	-6	-5	-4	-5	-6	-1	-3	-4	-5	-4	0	-6	-5	-4
2	0.34128	-3	4	2	1	-2	2	-2	-4	4	-4	-4	3	-1	-4	-4	-2	-2	-5	-2	-4	0	0	1	0	1	-1.005	1.212	2.219	-0.663	-1.524	0.33862	-1	-2	-3	-3	-3	-3	-3	-4	-1	-2	-1	0	-2	5	-4	-1	0
2	0.26679	-4	-4	-5	-6	-5	-4	-5	-6	-1	-4	-3	-5	-4	1	-6	-4	-4	0	10	-3	0	0	1	1	0	-0.838	1.512	3.097	0.26	0.83	0.2684	-2	2	-1	0	-5	2	0	-2	2	-5	-5	4	-3	-4	-4	4	0
2	0.048777	-3	-5	-6	-6	-4	-5	-6	-5	-5	6	0	-5	4	3	-6	-5	-3	-3	-2	2	0	1	0	1	0	0.393	0.816	2.131	-1.239	-0.547	0.048776	-4	6	-3	-4	-6	-1	-2	-5	-1	-4	0	4	2	-3	-5	-3	-4
2	0	0	0	0	0	0	0	0	0	0	0	0	0	0	0	0	0	0	0	0	0	0	0	0	0	0	0	0	0	0	0	0.97682	-3	-3	-4	-5	-3	-2	-4	-5	-3	2	2	-3	9	-1	-4	-3	-2
2	0.69884	1	3	-2	-1	-5	5	2	-3	-1	-4	-2	1	-3	-4	-4	-1	-2	-5	-4	-1	1	0	0	0	1	1.57	-0.146	-0.733	-0.591	-1.302	0.68697	-2	-4	-2	5	-5	-1	4	1	-4	-3	1	-3	-3	-5	-4	-2	-2
2	0.041901	0	3	-3	-4	-3	-1	-3	-3	-2	-2	2	2	1	0	-4	-1	-1	-2	3	-2	1	0	0	1	0	-0.838	1.512	3.097	0.26	0.83	0.04542	2	0	2	-1	-3	-2	0	0	0	-1	0	1	-1	1	-3	0	-1
2	0.06671	3	-3	3	-2	4	-3	-3	1	-1	-3	-4	-3	-4	-4	-4	2	2	-5	-4	-1	0	1	0	1	0	0.67	-2.647	-4.76	-0.228	1.399	0.055409	-4	-2	-5	-5	-5	-1	-4	-6	-1	-1	1	-3	2	4	-5	-3	-2
2	0.018742	3	-2	0	-3	-2	0	-3	-3	6	-1	0	-2	2	-1	-4	-2	-2	-2	-2	-1	1	0	0	1	0	-1.474	-0.078	-1.673	0.336	-0.417	0.019212	-1	-2	1	-2	-3	1	-1	0	0	0	0	-2	2	4	-5	0	-1
2	0.01875	4	-4	-3	-4	-4	-4	-4	6	-4	-5	-5	-3	-4	-5	-4	1	-3	-5	-3	-4	1	0	0	1	0	1.57	-0.146	-0.733	-0.591	-1.302	0.017341	-2	-5	-4	-6	0	-5	-5	-5	-5	6	2	-5	-1	-1	-5	-4	-2
2	0.66754	-1	-1	-1	-1	-4	-1	-1	-4	-3	-1	-2	0	-2	-4	6	0	4	-5	-4	-2	0	0	1	0	1	0.421	-1.392	-1.628	0.189	2.081	0.65823	2	0	-1	-1	-3	1	0	-2	-1	-1	1	0	-2	-2	0	0	2
2	0.068277	3	4	-1	0	-3	1	1	0	-2	-5	-4	2	-3	-5	-4	1	-3	-5	-3	-4	1	0	0	1	0	1.57	-0.146	-0.733	-0.591	-1.302	0.045941	-3	-5	-6	-6	-4	-5	-5	-6	-5	4	5	-5	1	-2	-5	-5	-3
2	0.10988	-3	-4	-3	-5	-4	-2	-4	-4	-1	0	5	-4	1	0	-4	-2	-2	-3	3	-1	0	0	1	1	0	1.266	-0.912	-1.505	-1.019	-0.987	0.093661	-3	-1	2	2	-4	3	-2	-3	-3	-3	-2	0	-2	-4	-3	0	5
2	0.064506	1	-1	-2	-2	0	-1	-2	-3	-3	-3	-4	5	-2	-5	-3	1	4	-5	-4	-3	1	0	0	0	1	-0.277	1.648	0.533	1.831	-0.561	0.062219	0	-5	-5	-5	-2	-4	-5	-5	-5	4	0	-4	-1	-2	-5	-2	-1
2	0.19437	1	2	0	-2	-5	4	1	-3	-2	-5	-4	4	-2	-5	-4	0	-1	-1	-4	-4	1	0	0	0	1	0.67	-2.647	-4.76	-0.228	1.399	0.1712	-1	3	0	5	1	-1	3	-3	-1	-5	-3	1	-1	-5	-4	-1	-2
2	0.54583	-2	-3	0	2	-2	-2	-2	6	-2	-4	-4	-2	-3	-4	-1	-2	-2	-4	-4	-4	0	0	1	0	1	1.045	2.064	1.33	-0.384	1.652	0.45463	-2	0	2	-1	-2	0	0	-3	0	-2	-1	5	1	-1	-1	0	0
2	0.079704	-4	-5	-4	-5	-4	-3	-5	-5	3	3	2	-5	0	4	-1	-4	-3	-3	6	-1	1	0	0	1	0	0.393	0.816	2.131	-1.239	-0.547	0.079181	-1	0	-4	-4	5	-1	1	-4	-1	1	2	1	0	-4	0	-2	-1
2	0.039212	-3	-2	-2	2	-2	1	7	-3	-3	-6	-6	0	-5	-6	-4	-1	-3	-6	-5	-5	1	0	0	0	1	0.113	-0.837	1.477	1.357	-1.453	0.030097	-4	-4	-1	7	-6	0	5	-4	-3	-6	-6	-3	-5	-6	-4	-3	-4
2	0.12039	-3	-2	-2	-3	-2	0	-2	-4	-3	-2	-4	0	-2	-4	-1	1	7	-6	-5	-1	0	0	1	0	1	0.908	1.313	2.213	-0.032	0.326	0.11159	0	-1	3	6	-2	0	-1	-3	0	-5	-5	1	-5	-6	-3	-1	-2
2	0.082214	-1	-4	1	-2	-2	-3	-3	-3	-4	-4	-5	-1	-4	-4	-2	5	5	-2	-5	-4	0	0	1	1	0	0.908	1.313	2.213	-0.032	0.326	0.097429	-1	-2	7	-2	-4	-2	0	-3	-1	-6	-5	-2	-5	-6	3	2	-2
2	0.199	-2	-4	-2	-1	-5	-4	-3	7	0	-5	-4	-4	-1	0	-3	-2	-3	-5	-5	-5	1	0	0	0	1	1.045	2.064	1.33	-0.384	1.652	0.17388	-2	-4	1	5	-5	-2	-1	-4	6	-1	-3	0	1	-1	2	-1	-2
2	0.10621	-2	-5	-4	-3	-4	-3	-4	-4	-4	1	3	-5	3	5	-3	-3	-2	-3	1	0	1	0	0	1	0	1.242	-1.262	-0.544	-1.337	-0.279	0.083204	-2	2	-3	-2	-3	2	5	-1	-1	-4	-1	2	-2	-4	-2	-3	-3
2	0.21425	-3	-2	0	7	-5	-1	3	-3	-1	-4	-5	-2	-4	-5	-3	-1	-2	-5	-4	-4	1	0	0	0	1	-0.259	-3.242	-3.656	1.05	0.302	0.21107	1	-2	1	-1	-2	2	-1	-1	-2	-3	-3	-1	-2	-4	-1	5	1
2	0.21633	-2	-3	-4	-5	-2	-3	-4	-5	-4	1	5	-3	5	-1	-4	-3	-2	-3	-2	0	1	0	0	1	0	1.266	-0.912	-1.505	-1.019	-0.987	0.24297	-3	-3	0	7	-5	-1	1	-3	-2	-4	-5	-2	-4	-5	-3	-1	-2
2	0.24778	-1	-2	-4	-4	-2	-3	-3	-4	-4	2	0	-3	0	-2	-3	-3	-1	-4	-2	6	1	0	0	1	0	1.242	-1.262	-0.544	-1.337	-0.279	0.26012	-1	-4	-4	-4	0	-3	-4	-4	-4	3	0	-3	0	-2	-2	-3	-1
2	0.092548	-2	0	-1	-2	-4	7	1	-3	0	-4	-3	0	-2	-4	-3	-1	-2	-3	-3	-4	1	0	0	0	1	-0.503	-1.853	-3.005	0.931	-0.179	0.099823	-3	-3	-5	-5	-3	-3	-4	-5	-4	1	6	-4	1	-1	-4	-4	-2
2	0.060251	-1	-4	-4	-5	10	-4	-5	-4	-4	-1	-1	-4	-2	-3	-4	-1	-1	-4	-3	1	0	1	0	1	0	-1.02	-0.255	-0.862	-1.343	0.465	0.054998	-3	-4	-5	-5	-3	-4	-5	-5	-5	6	2	-4	1	-1	-4	-4	-2
2	0.23425	-2	-3	-3	-4	0	-1	-3	-4	-3	0	1	-2	8	-1	-4	-2	-2	-3	-2	0	1	0	0	1	0	-1.005	1.212	2.219	-0.663	-1.524	0.2394	-4	-4	-4	-5	-4	-4	-4	-4	-2	-2	-1	-4	-1	8	-5	-4	-3
2	0.032304	-4	-4	-5	-6	-4	-3	-4	-4	-4	-4	-3	-4	-3	0	-5	-4	-4	12	1	-4	0	1	0	1	0	-2.128	-0.184	0.672	-0.595	0.009	0.030967	-3	-4	-5	-5	-2	-4	-5	-5	-5	7	1	-4	0	-1	-4	-4	-2
2	0.34542	0	-4	-5	-5	-4	-4	-3	-5	-5	-1	4	-4	-2	0	5	-1	-3	-5	-4	-2	1	0	0	1	0	0.421	-1.392	-1.628	0.189	2.081	0.21705	-2	-2	-4	-4	-4	2	-4	-4	-4	2	2	-3	1	3	-3	0	0
2	0.4841	-3	-5	-2	-4	-1	-4	-6	-4	-5	4	4	-5	5	0	-6	-3	-3	-5	-3	1	1	0	0	1	0	0.393	0.816	2.131	-1.239	-0.547	0.4726	-3	-3	-3	-1	-7	-1	7	-4	-3	-6	-6	-1	-5	-6	-4	-3	-4
2	0.35622	0	-2	0	3	-5	2	5	-2	-1	-5	-4	0	-3	-6	-4	0	-1	-5	-5	-4	1	0	0	0	1	0.113	-0.837	1.477	1.357	-1.453	0.35115	3	0	-3	-3	-5	0	5	-4	-3	-2	-3	0	-1	-2	-4	0	-1
2	0.38849	0	2	-1	-3	-3	4	2	-1	0	-5	-4	4	-3	-5	-4	1	-1	-6	-5	-4	0	0	1	0	1	0.67	-2.647	-4.76	-0.228	1.399	0.36395	0	-1	-4	-4	-5	-3	-4	-4	-5	-5	-3	-3	-5	-4	8	0	-2
2	0.31855	-3	-2	4	7	1	-2	0	-3	-3	-5	-6	-3	-5	-6	-3	1	-3	-6	-3	-5	0	0	1	0	1	-0.259	-3.242	-3.656	1.05	0.302	0.27903	-3	-5	-1	-5	-5	-4	-3	-5	-5	3	0	-4	0	-3	7	-2	0
2	0.16504	-3	-3	-2	0	-5	-3	-5	-4	-1	3	4	-2	3	1	1	-1	-2	-5	-1	0	1	0	0	1	0	0.393	0.816	2.131	-1.239	-0.547	0.10825	-4	-5	-6	-6	-4	-5	-6	-6	-6	3	5	-5	3	3	-6	-4	-2
2	0.24457	-1	3	0	-2	-2	2	2	-1	0	-2	-2	2	-1	-3	-4	1	0	-3	1	0	0	0	1	0	1	-0.277	1.648	0.533	1.831	-0.561	0.23124	-2	-2	-1	-2	-5	-1	1	-2	-2	4	4	-4	-1	2	-5	-2	-2
2	0.055745	-2	-5	-5	-6	4	-4	-3	-4	-1	1	0	-5	0	4	-3	-4	-3	-2	7	0	1	0	0	1	0	-1.02	-0.255	-0.862	-1.343	0.465	0.047558	-2	-2	7	1	-3	-1	2	-3	-3	-4	-5	-3	-1	-3	-5	1	-1
2	0.14902	-3	-4	1	7	-6	-3	1	-3	0	-5	-6	-3	-3	-3	-5	-2	-4	-1	-3	-3	1	0	0	0	1	0.113	-0.837	1.477	1.357	-1.453	0.1451	0	5	-1	0	-1	3	1	-3	1	-5	-4	0	-3	-6	-4	2	-1
2	0.53022	-5	-5	-5	-6	-5	-6	-6	-6	-3	-2	0	-6	0	8	-6	-5	-5	0	1	0	0	0	1	1	0	-0.397	0.412	1.891	-1.006	-0.59	0.52353	-3	-4	-5	-6	-4	-4	-5	-6	-5	4	3	-2	7	-2	-5	-5	-4
2	0.21447	-1	-5	-3	-6	-4	-4	-5	-3	-5	3	3	-3	2	5	-4	-2	-1	-4	-2	1	0	0	1	1	0	1.266	-0.912	-1.505	-1.019	-0.987	0.1875	1	-3	-3	-4	-4	-4	-4	2	-4	0	-1	-4	-1	-2	-3	0	5
2	0.027422	-4	-3	8	0	-3	-3	-3	-3	4	-4	-6	-3	-3	-5	-5	-1	-1	-6	-3	-2	0	0	1	1	0	-0.169	0.933	1.299	0.945	0.828	0.029695	-3	-5	-5	-6	-4	-5	-6	-6	-5	3	5	-5	2	1	-3	-5	-4
2	0.053993	-2	3	-3	-2	-4	2	-1	-4	-3	-2	-2	5	4	-4	-4	-3	-3	-5	-4	-1	0	0	1	1	0	-1.005	1.212	2.219	-0.663	-1.524	0.056293	-3	-5	-5	-6	-3	-4	-5	-6	-5	2	2	-5	4	-3	-5	-4	-3
2	0.16567	-2	-4	0	-3	-5	-3	-4	7	-4	-5	-6	-4	-5	-3	-4	-2	-4	-5	-5	-5	0	0	1	0	1	1.045	2.064	1.33	-0.384	1.652	0.12478	-2	-3	4	5	-5	-2	0	-3	7	-6	-6	-2	-5	-5	2	-2	-3
2	0.16746	-3	6	0	-1	-3	1	-1	-4	0	-1	-3	0	-1	-4	-4	-1	2	-5	-1	-2	0	0	1	0	1	1.242	-1.262	-0.544	-1.337	-0.279	0.14345	-2	-2	3	4	-5	0	-1	5	-2	-6	-6	0	-5	-5	-4	-2	-3
2	0.016056	-3	-6	-5	-6	11	-5	-6	-5	-5	-3	-3	-5	-4	-5	-5	-3	-3	-5	-5	-3	0	1	0	1	0	-1.02	-0.255	-0.862	-1.343	0.465	0.013791	-3	-5	-1	-5	-2	-5	-5	-6	-5	7	0	-5	0	-2	-5	-3	-3
2	0.14655	-2	-5	-2	-3	-5	-3	-4	7	-4	-6	-6	-3	-5	-6	-4	-2	-4	-5	-5	-6	0	0	1	0	1	1.045	2.064	1.33	-0.384	1.652	0.13888	-3	-5	-6	-6	0	-5	-5	-6	-5	5	4	-5	0	-2	-5	-5	-3
2	0.097625	0	-3	-1	0	-1	-1	4	-1	1	-5	-5	-1	-2	-5	-3	3	2	-5	-3	-4	0	0	1	0	1	0.67	-2.647	-4.76	-0.228	1.399	0.074093	1	-3	-4	-4	-3	-3	-4	-4	-4	1	-2	-1	-2	-4	-4	0	3
2	0.33804	-3	-5	-5	-6	2	-4	-5	-6	-5	1	5	-5	3	1	-5	-5	-3	-4	-1	0	1	0	0	1	0	1.266	-0.912	-1.505	-1.019	-0.987	0.324	6	-3	-2	-4	3	-3	-3	-2	-4	0	-2	-3	-3	-4	-3	-1	0
2	0.53011	-1	0	1	5	-5	0	1	-4	3	-5	-4	4	-4	-5	-3	-1	-3	-6	-4	-5	0	0	1	0	1	-0.259	-3.242	-3.656	1.05	0.302	0.51193	-3	0	-3	-3	-5	-1	-2	-4	-3	-5	-4	7	-4	1	-3	-3	-3
2	0.14038	1	2	-1	-2	0	2	-1	3	-2	-4	-3	1	-1	-2	-4	-1	-2	7	-1	-3	1	0	0	1	0	1.045	2.064	1.33	-0.384	1.652	0.16411	1	0	3	-1	-2	-2	-2	-3	-2	-2	3	0	5	-1	-4	-2	-2
2	0.041227	-3	0	-3	-3	-5	-1	-2	-4	-3	1	-4	7	-3	-5	-3	-3	-3	-5	-4	-3	1	0	0	1	0	-0.277	1.648	0.533	1.831	-0.561	0.040919	-3	-4	-5	-6	1	-2	-4	-6	-5	2	5	-4	2	-1	-5	-4	-3
2	0	0	0	0	0	0	0	0	0	0	0	0	0	0	0	0	0	0	0	0	0	0	0	0	0	0	0	0	0	0	0	0	0	0	0	0	0	0	0	0	0	0	0	0	0	0	0	0	0
2	0.83254	2	3	-1	0	-3	2	1	-2	-1	-3	-2	1	-2	-4	-1	0	1	-4	-3	-2	0	0	1	0	1	0.44	2.897	1.502	1.538	-0.055	0.82223	-1	5	-1	-1	-3	1	0	-2	-2	-3	-3	2	-2	-2	-3	1	-1
2	0.42648	1	2	0	2	-4	3	2	-1	-1	-4	-3	2	-3	-3	-1	-1	0	-5	-4	-3	1	0	0	0	1	-0.259	-3.242	-3.656	1.05	0.302	0.33918	-1	-1	-2	-2	-4	3	1	-1	7	-2	-1	-2	-1	0	-2	-1	0
2	0.094329	1	1	-1	3	-3	2	2	-3	0	-2	-1	2	0	-3	-4	-1	0	2	-1	-1	1	0	0	0	1	0.908	1.313	2.213	-0.032	0.326	0.082162	-2	0	-4	-5	-1	-1	-3	-5	-1	-2	-1	5	-1	-3	-5	-3	-3
2	0.082162	-2	0	-4	-5	-1	-1	-3	-5	-1	-2	-1	5	-1	-3	-5	-3	-3	8	4	-2	1	0	0	1	0	-2.128	-0.184	0.672	-0.595	0.009	0.06135	-1	4	-1	-1	-4	1	-2	-5	5	0	2	1	0	-1	-5	-3	-3
2	0.34071	0	-3	0	7	-6	-1	1	-4	0	-5	-5	-3	-2	-5	-1	-2	-3	-7	-4	-5	1	0	0	1	0	-0.259	-3.242	-3.656	1.05	0.302	0.3169	1	0	-1	3	-3	-1	2	3	-2	-6	-4	-1	-3	-4	-2	1	-2
2	0.055951	-3	-4	1	1	-5	-2	-4	7	-5	-6	-6	-4	-5	-6	-5	-3	-3	-5	-6	-6	0	0	1	0	1	1.045	2.064	1.33	-0.384	1.652	0.063813	-1	-3	-2	3	-4	0	0	-4	-1	0	-1	-2	-3	-2	-2	0	4
2	0.11378	-3	-5	-5	-6	0	-5	-5	-6	-6	5	1	-5	0	0	-5	-4	2	-3	-1	4	0	0	1	1	0	0.908	1.313	2.213	-0.032	0.326	0.11338	4	-5	-4	-4	-2	-2	-4	4	-5	-4	-5	-4	-4	-5	-4	2	0
2	0.088275	1	-5	1	-4	5	-2	-4	1	3	0	-2	-3	0	-4	-4	0	-1	-2	-3	3	0	0	1	1	0	1.242	-1.262	-0.544	-1.337	-0.279	0.076734	-3	0	-1	6	-4	-1	0	2	-1	-4	-6	2	-5	-6	0	-2	-4
2	0.48393	-2	-1	1	-2	-4	6	0	-2	-2	1	-3	2	0	-4	-4	-1	0	-5	-3	-2	0	0	1	0	1	-0.277	1.648	0.533	1.831	-0.561	0.50932	-3	2	0	-3	-5	0	-2	-2	4	-5	-5	6	-4	-5	1	-2	0
2	0.32429	-2	-2	-1	4	-4	2	6	-4	-2	-5	-5	-1	-4	-5	-4	-1	-1	-5	-4	-4	1	0	0	0	1	0.113	-0.837	1.477	1.357	-1.453	0.23746	-1	-5	-5	-5	-3	-5	-5	-4	-5	6	2	-5	1	-2	-5	-4	-3
2	0.6991	0	0	1	0	-1	0	0	1	0	0	-1	0	-1	0	1	0	0	-1	0	0	0	0	1	1	0	1.045	2.064	1.33	-0.384	1.652	0.65567	0	0	0	0	-1	0	0	0	-1	-1	0	0	-1	-1	2	1	0
2	0.23022	-1	-3	-1	-3	-3	-2	-2	-2	-3	-5	-5	-1	-4	-5	-3	7	0	-5	-4	-4	0	0	1	1	0	0.67	-2.647	-4.76	-0.228	1.399	0.18482	6	-4	-4	-3	4	-3	-4	2	-4	-4	-4	-3	1	-5	-4	-1	-3
2	0.313	0	-1	3	5	-5	-1	1	-3	0	-5	-5	1	-4	-5	1	0	-2	-6	-4	-3	0	0	1	0	1	-0.259	-3.242	-3.656	1.05	0.302	0.26083	2	-1	-2	1	-5	-2	-2	-2	-1	-4	-4	1	-4	-5	6	-1	-1
2	0.80315	1	1	-1	-1	-5	0	-1	1	4	-2	-2	0	1	-5	2	1	0	-5	-2	-2	0	0	1	0	1	0.67	-2.647	-4.76	-0.228	1.399	0.78784	1	1	-2	-2	-5	-1	-4	0	0	1	1	-3	2	0	2	0	-1
2	0.39208	-3	4	-2	-1	-4	-1	0	-4	2	-1	-3	3	-3	-4	-4	-1	3	-5	-3	2	0	1	0	0	1	-0.277	1.648	0.533	1.831	-0.561	0.38825	6	-4	-4	-4	-3	-3	-3	-2	-4	1	-1	-3	-2	-4	-1	-1	0
2	0.27449	0	0	0	2	-1	-2	2	0	-2	-3	-3	-1	-2	-2	5	-1	-2	-5	-4	0	0	0	1	0	1	0.421	-1.392	-1.628	0.189	2.081	0.30935	-1	1	1	1	-5	-1	-3	6	-1	-5	-5	-1	-4	-2	-2	-2	-3
2	0.38251	-1	-1	-3	-2	0	-2	2	-4	0	3	0	-2	-1	-2	-3	-3	-1	-4	-2	4	0	1	0	1	0	0.393	0.816	2.131	-1.239	-0.547	0.39107	-2	-3	-3	-4	-1	-3	-2	-1	-4	3	0	0	-1	-1	-3	-2	0
2	0.090253	0	0	-1	3	-5	3	4	-1	0	-3	-5	0	-3	-3	0	0	-1	-5	-1	-2	1	0	0	0	1	0.113	-0.837	1.477	1.357	-1.453	0.08346	-1	1	-2	2	-5	0	5	-4	0	-3	-3	3	-3	-4	0	-2	-3
2	0.16223	-1	4	-1	-2	-3	3	2	-3	2	-2	0	1	1	-5	-4	0	-2	-1	-2	-2	1	0	0	0	1	0.44	2.897	1.502	1.538	-0.055	0.14837	-3	3	-1	0	-5	1	4	-3	3	-2	-4	2	-2	-2	-1	-2	-1
2	0.05195	2	0	-3	-4	2	-2	-2	-4	-1	3	3	-3	4	1	-3	-3	-2	-2	0	-1	1	0	0	1	0	1.266	-0.912	-1.505	-1.019	-0.987	0.043897	-2	1	-3	-2	3	1	-2	-5	4	1	-1	1	-1	3	-5	-3	-2
2	0.65296	-2	1	-1	-1	-4	4	2	-2	1	-3	-3	0	-2	0	0	0	-2	-1	5	-1	0	0	1	1	0	-0.503	-1.853	-3.005	0.931	-0.179	0.64045	-2	-1	-1	-2	-3	1	0	-2	1	-1	1	1	-2	-1	1	0	1
2	0.75488	-3	-5	-2	-3	1	-5	-4	7	-5	-6	-5	-4	-5	-6	-5	-3	-4	-5	-6	-6	0	0	1	1	0	1.045	2.064	1.33	-0.384	1.652	0.75934	-3	-2	-1	-3	-2	2	0	-5	2	-4	-2	0	0	1	-3	0	5
2	0.78252	-3	-2	-4	-5	-5	-1	-3	-5	0	-3	0	-1	1	5	-3	-3	-3	0	7	-3	0	1	0	1	0	-0.838	1.512	3.097	0.26	0.83	0.78389	0	-1	0	-1	1	0	-1	-2	-4	-1	-1	-2	1	-3	-1	2	4
2	0.91707	-2	-2	-5	-5	10	-4	-3	0	-5	-4	-2	-2	0	-5	-1	-1	-2	-5	-5	-2	0	0	1	1	0	-1.02	-0.255	-0.862	-1.343	0.465	0.91865	-1	-2	3	-2	-4	-1	-2	-1	0	-2	-3	-1	0	-2	-4	3	5
2	0.90804	-3	-1	-3	-4	-5	-1	-2	-2	4	-2	-2	-1	2	4	-5	-2	2	3	5	-3	0	1	0	1	0	0.908	1.313	2.213	-0.032	0.326	0.9066	-3	-3	-4	-5	-2	-2	-3	-4	4	-3	-3	-1	-3	5	-5	-2	-2
2	0.68301	-2	-3	-2	-5	10	-4	-3	-3	-5	-4	-3	-5	-4	-4	-2	-2	0	-4	0	-3	0	0	1	1	0	-1.02	-0.255	-0.862	-1.343	0.465	0.64962	0	0	-2	-1	-5	-1	1	1	0	-4	-3	2	-4	-3	5	0	-2
2	0.0131	-2	-4	-4	-1	1	-3	-4	1	-2	0	1	-4	-3	0	4	1	-2	-2	-3	2	1	0	0	1	0	0.421	-1.392	-1.628	0.189	2.081	0.011114	-2	-4	-4	-2	3	-3	-3	-2	-4	2	3	-4	1	2	-2	0	1
2	0.011114	-2	-4	-4	-2	3	-3	-3	-2	-4	2	3	-4	1	2	-2	0	1	-1	-2	2	1	0	0	1	0	1.266	-0.912	-1.505	-1.019	-0.987	0.009018	-1	-3	-2	-4	1	-4	-4	1	-4	1	4	-4	-2	1	-2	0	1
2	0.009018	-1	-3	-2	-4	1	-4	-4	1	-4	1	4	-4	-2	1	-2	0	1	-1	-2	0	1	0	0	1	0	1.266	-0.912	-1.505	-1.019	-0.987	0.007195	0	-3	-4	-5	0	-3	-3	-1	-1	1	4	-4	-1	1	-1	-2	-1
2	0.27366	3	0	-2	0	-3	-1	3	-2	-3	-2	-2	2	-2	-4	-2	0	0	-4	-4	1	0	0	1	0	1	1.57	-0.146	-0.733	-0.591	-1.302	0.28726	1	-1	0	1	-4	1	0	-2	-1	-2	-4	5	-3	-4	-3	0	-2
2	0.14326	-2	-2	0	0	-5	4	5	-2	2	-2	-3	1	-2	-4	-2	-1	-1	-5	-3	-2	0	1	0	0	1	0.113	-0.837	1.477	1.357	-1.453	0.10364	-1	-2	-1	-2	-4	0	1	-3	-4	-1	-3	1	-3	-4	2	1	5
2	0.032552	6	-3	-2	-3	-2	-2	-3	-3	0	-4	-3	0	-3	-4	-3	1	0	-5	-2	-1	1	0	0	1	0	1.57	-0.146	-0.733	-0.591	-1.302	0.030257	-2	-4	-2	-3	-5	-4	-4	7	-3	-6	-6	-1	-5	-6	-5	-2	-2
2	0.059092	5	-4	-4	-5	1	-4	-4	1	-5	2	0	-4	-1	-3	-4	-2	-1	-5	-3	1	1	0	0	1	0	1.57	-0.146	-0.733	-0.591	-1.302	0.058439	3	-5	-4	-5	5	-4	-4	2	-5	-1	-3	-4	-1	-4	-4	-2	1
2	0.016351	-3	7	-3	-4	-6	-1	-2	-4	-1	-5	-5	4	-4	-5	-4	-3	-3	-5	-4	-5	1	0	0	1	0	-0.277	1.648	0.533	1.831	-0.561	0.017526	6	-4	-4	-4	5	-3	-3	-1	-4	-4	-3	-3	-3	-5	-3	0	-2
2	0.11134	0	-5	-5	-5	-4	-4	-5	-5	-4	2	3	-5	1	6	-5	-3	-3	0	1	-1	1	0	0	1	0	-0.397	0.412	1.891	-1.006	-0.59	0.11935	-2	-1	-1	-2	-5	8	0	-4	1	-1	-2	0	-2	-5	-3	-2	-2
2	0.070464	-2	-4	-3	-3	-4	-4	-4	7	-4	-5	-5	-4	-4	1	-4	-3	-4	4	-3	-4	0	1	0	1	0	1.045	2.064	1.33	-0.384	1.652	0.06281	0	2	0	-1	-2	-1	-1	-4	3	0	-1	2	-1	1	0	-2	1
2	0.12265	-2	1	-3	-4	-4	-1	-2	-5	1	3	1	1	2	-1	-5	-3	-1	-4	1	4	0	1	0	1	0	0.393	0.816	2.131	-1.239	-0.547	0.090298	0	-3	2	-4	2	0	-3	-3	3	3	0	-3	-2	-4	-5	0	0
2	0.61148	-3	-4	-2	-5	-3	-4	-5	-5	-5	4	4	-4	-1	-1	-5	-4	-3	-4	-3	3	0	0	1	1	0	1.266	-0.912	-1.505	-1.019	-0.987	0.61483	-3	-1	-4	-4	-5	-3	-3	-4	-4	-5	-5	-3	-5	-6	8	-3	-3
2	0.18171	-2	-4	-5	-5	-4	-4	-4	-5	-2	2	2	-4	1	0	4	-4	-1	-4	-3	4	1	0	0	1	0	1.242	-1.262	-0.544	-1.337	-0.279	0.19106	-1	-2	-2	-3	2	-2	-3	-1	-4	-3	-4	-3	-3	-4	-2	3	6
2	0.29615	4	1	-3	-4	-4	-3	0	-1	0	-2	-1	-3	-3	-2	-1	0	0	-4	4	-2	1	0	0	1	0	1.57	-0.146	-0.733	-0.591	-1.302	0.30868	-3	0	-2	-1	-6	0	7	-4	1	-6	-5	-1	-4	-5	-3	-2	-3
2	0.43876	-2	3	-1	-4	0	-2	-3	-3	4	-1	-2	-2	-3	3	0	2	0	-3	3	0	0	0	1	0	1	-0.838	1.512	3.097	0.26	0.83	0.3971	-2	4	-1	-2	4	0	-2	-2	0	-4	-4	3	-1	-3	-4	2	1
2	0.82559	2	1	0	-2	-4	-1	2	-2	-1	-4	-4	-2	-4	-1	-2	4	0	-5	-4	-4	0	0	1	0	1	0.67	-2.647	-4.76	-0.228	1.399	0.86255	-3	4	-3	-2	-4	2	-3	-3	-1	-4	-4	0	-3	0	-4	0	0
2	0.52016	1	-2	-1	-4	-2	-3	-2	4	-2	3	0	-3	1	1	-3	-2	-3	2	1	-2	0	0	1	1	0	1.045	2.064	1.33	-0.384	1.652	0.53707	-2	-2	-1	-2	-4	1	-2	-1	-1	-2	-3	-1	-3	-4	-4	3	6
2	0.44932	0	-3	-2	-2	2	1	-1	0	0	2	-1	2	-1	0	1	0	-3	-4	-4	1	0	0	1	1	0	1.57	-0.146	-0.733	-0.591	-1.302	0.469	-3	-4	-3	-1	0	1	-1	-3	-1	0	3	-4	4	1	1	-3	-2
2	0.72591	2	-4	-1	3	-4	-2	-3	-4	-2	1	-1	-2	-1	-4	4	1	2	-5	-4	-1	0	0	1	1	0	0.67	-2.647	-4.76	-0.228	1.399	0.73339	0	-3	-4	-4	-4	-2	-2	-2	-4	0	2	2	-3	1	5	0	-2
2	0.066668	-3	-4	-4	-5	4	-4	-4	-2	3	2	1	-2	-2	-2	-4	-3	0	7	0	3	1	0	0	1	0	-2.128	-0.184	0.672	-0.595	0.009	0.060108	-4	0	-1	-1	1	-1	-3	-4	7	-4	-4	-1	-3	2	-4	0	-3
2	0.37834	0	1	-1	2	-5	2	3	-2	1	-2	-2	3	-1	-4	-3	1	-2	-5	-3	-2	1	0	0	0	1	0.113	-0.837	1.477	1.357	-1.453	0.45448	-1	0	0	-4	-4	0	-2	-3	-3	0	3	3	1	-4	-3	1	-2
2	0.40481	-3	-3	-4	-4	-3	2	-3	-4	-3	2	5	-3	0	2	-4	-3	-3	-3	-2	-1	1	0	0	1	0	0.393	0.816	2.131	-1.239	-0.547	0.41623	-3	-4	-4	-5	1	-4	-4	-1	1	-3	-1	-4	-2	5	-5	-3	-1
2	0.91407	-1	2	-1	1	-3	-1	3	-3	2	-2	-3	-1	-2	-3	0	-2	-1	-4	-3	3	1	0	0	0	1	0.113	-0.837	1.477	1.357	-1.453	0.89985	-2	1	-1	3	-4	2	2	-3	2	-4	-4	3	-3	-4	-3	1	-2
2	0.039098	-4	-5	-6	-6	0	-5	-5	-5	-5	4	5	-5	2	-1	-5	-5	-3	-4	-2	1	0	1	0	1	0	1.266	-0.912	-1.505	-1.019	-0.987	0.034259	-3	-4	-5	-6	-2	-3	-5	-6	0	3	0	-5	0	1	-5	-4	0
2	0.089997	-1	-2	1	3	0	0	0	-2	-2	-3	-3	-1	-1	-5	-4	1	5	-3	-4	-3	0	0	1	0	1	0.908	1.313	2.213	-0.032	0.326	0.080853	0	-1	0	3	-5	0	3	0	-1	-5	-4	1	-4	-4	3	0	-2
2	0.2025	1	0	-1	-1	-1	3	2	-2	-1	-3	-3	-1	-2	-5	-1	3	0	-5	-1	-2	1	0	0	0	1	0.67	-2.647	-4.76	-0.228	1.399	0.16561	1	1	0	1	-2	0	2	-2	-1	-2	-2	1	1	-5	-4	2	-1
2	0.30738	-1	-2	-2	-2	-2	-2	-2	5	-2	-3	-3	-1	-2	-3	-2	3	-1	-2	-2	-2	0	0	1	1	0	1.045	2.064	1.33	-0.384	1.652	0.24311	0	0	-2	-3	7	-2	-3	0	-2	-2	0	1	-1	1	-3	0	1
2	0.43991	0	-2	1	1	0	-3	1	3	1	-4	-4	0	-4	-2	-3	3	0	-4	-4	-3	0	0	1	0	1	1.57	-0.146	-0.733	-0.591	-1.302	0.42683	-2	-3	0	0	-1	0	4	-3	-2	-4	-3	1	-4	-2	5	1	-1
2	0.43197	-2	0	0	4	-3	0	3	-3	1	-1	-4	1	-1	-3	-4	0	1	-1	-2	-1	1	0	0	0	1	-1.474	-0.078	-1.673	0.336	-0.417	0.35639	1	-3	2	2	-3	-3	-3	-3	-3	2	1	-3	3	2	-3	-2	1
2	0.78237	-1	-2	0	0	-2	-2	-1	-2	-3	0	0	-1	2	-1	0	1	1	0	0	2	0	0	1	0	1	1.242	-1.262	-0.544	-1.337	-0.279	0.7835	-1	-1	-1	3	-1	0	3	-2	-1	-2	-2	-1	-1	-2	2	0	-1
2	0.30757	-3	-2	5	4	-2	-2	-1	0	5	-3	-4	-2	-3	-5	-1	1	-2	-5	-3	-3	0	0	1	1	0	0.67	-2.647	-4.76	-0.228	1.399	0.28519	-2	-1	-1	-2	1	-1	-1	-2	0	0	-2	0	-2	-3	4	1	3
2	0.23061	0	2	1	2	-1	-3	-1	-2	-2	-1	0	0	-1	-2	2	-1	-1	-4	3	-1	1	0	0	1	0	0.67	-2.647	-4.76	-0.228	1.399	0.20415	-2	-3	-5	-3	-4	-5	-5	-4	-5	2	5	-4	-1	-1	-3	-3	-4
2	0.9924	2	-2	-2	2	-4	0	6	-1	-2	-4	-4	-1	-3	-5	0	-1	-2	-4	-4	-3	0	0	1	0	1	0.113	-0.837	1.477	1.357	-1.453	0.99234	2	-3	-1	4	-3	-2	-1	-2	-3	-3	-2	-2	-3	-4	-2	4	-1
2	0.21217	-1	2	-1	1	-2	-1	0	-2	0	-2	-1	0	0	4	-2	-1	-2	4	3	-2	0	0	1	1	0	-0.397	0.412	1.891	-1.006	-0.59	0.15144	-1	-4	-2	-2	-3	-3	-2	7	-3	-4	-4	-3	-4	-4	-3	-1	-3
2	0.98249	-1	-1	2	-2	7	-1	-2	-3	-3	-2	0	-2	-2	-3	1	2	0	-3	-3	-2	0	0	1	1	0	-1.02	-0.255	-0.862	-1.343	0.465	0.98304	-1	-3	-3	-3	-3	2	-2	-4	-1	-1	4	-2	-1	-2	4	-3	-2
2	0.31663	1	-1	1	-1	1	-1	0	-2	1	-1	-2	0	1	-1	-1	2	1	-5	1	0	0	1	0	1	0	0.67	-2.647	-4.76	-0.228	1.399	0.30528	1	0	-1	0	4	-1	-2	-3	-5	0	2	1	1	1	-2	-2	-1
2	0.1874	-2	-3	-3	-4	-3	-3	-4	-4	-1	1	-1	-3	9	-1	-4	1	-1	-4	-3	0	1	0	0	1	0	-1.005	1.212	2.219	-0.663	-1.524	0.17181	-3	-5	-5	-5	-4	-4	-5	-5	-4	4	2	-5	1	5	-5	-3	-3
2	0.8898	1	-2	-3	0	1	2	0	5	-4	0	-4	-2	-4	-1	-3	0	-2	-5	-5	-1	0	0	1	0	1	1.045	2.064	1.33	-0.384	1.652	0.87705	-3	-1	-1	7	-6	-1	2	-2	-3	-3	-5	-1	-5	-6	-4	-1	-3
2	0.001205	5	-4	-4	-5	-5	-5	-5	6	-5	-6	-6	-4	-5	-6	-5	-2	-4	-6	-6	-5	1	0	0	1	0	1.045	2.064	1.33	-0.384	1.652	0.001282	2	-5	-6	-6	3	-5	-5	-5	-6	2	4	-5	0	-3	-5	-2	1
2	0.011281	2	3	-4	-3	-4	-3	-3	-4	-4	1	3	-2	-1	-2	-3	1	-3	-4	-1	1	1	0	0	1	0	1.266	-0.912	-1.505	-1.019	-0.987	0.010347	1	-1	-2	-4	-3	-4	-4	-4	-4	2	2	-3	0	4	-4	-1	3
2	0.005474	0	-4	-1	-5	4	-4	-4	1	-5	2	-4	-3	2	-5	-5	3	2	-6	-5	2	1	0	0	1	0	0.67	-2.647	-4.76	-0.228	1.399	0.006064	3	-5	3	0	-5	-4	-4	0	-2	-4	-4	-4	-2	4	-5	1	2
2	0.50031	-1	-1	1	3	-4	0	3	4	-2	-3	-4	-2	2	-3	-2	-2	-2	-4	-2	-2	0	0	1	0	1	-0.259	-3.242	-3.656	1.05	0.302	0.54759	1	-1	-1	2	-1	1	5	-2	-2	-2	-2	-1	0	-3	-1	-2	-1
2	0.98583	-1	0	2	-1	-3	-2	-2	-2	-2	-4	-4	-1	-3	-4	2	5	2	-4	-3	-3	0	0	1	0	1	0.67	-2.647	-4.76	-0.228	1.399	0.98481	-2	-2	-1	6	-4	-2	-1	-1	-3	-2	-4	0	-3	-4	1	1	-2
2	0.044324	-3	-3	0	6	-5	0	4	-3	3	-5	-5	-2	-4	-5	-3	0	-1	-5	-3	-5	0	0	1	1	0	-0.259	-3.242	-3.656	1.05	0.302	0.050546	-3	-1	-1	-3	-2	3	-1	-3	6	-3	0	1	4	-2	-4	-1	3
2	0.03313	4	-4	-4	-5	-3	-4	-4	-4	-5	-1	-3	-4	-3	-4	-4	-2	3	-5	-4	4	1	0	0	1	0	1.57	-0.146	-0.733	-0.591	-1.302	0.030366	6	-4	-4	-4	2	-3	-4	-2	-4	-3	-4	-3	-3	-5	-3	-1	-1
2	0.14804	-3	-5	-6	-6	-4	-5	-5	-6	-6	5	-1	-5	-2	0	-5	-4	-3	-4	-3	6	0	1	0	1	0	1.242	-1.262	-0.544	-1.337	-0.279	0.11204	-4	-5	-6	-6	-4	-5	-5	-6	-1	1	6	-5	0	0	-5	-5	-4
2	0.23145	-2	0	-1	-4	-1	1	-3	-4	-3	-1	3	2	0	1	-1	-2	-3	-1	3	1	0	1	0	1	0	-0.503	-1.853	-3.005	0.931	-0.179	0.19595	0	-1	-3	-2	1	-2	-3	-2	-1	-1	1	-2	1	-2	-2	-2	1
2	0.34032	-2	-2	5	0	-5	-1	-3	4	5	-6	-5	-1	-4	-5	-3	-2	-3	-1	-1	-5	0	0	1	0	1	1.045	2.064	1.33	-0.384	1.652	0.3385	-4	-4	-5	-6	-4	-4	-5	-6	-5	3	4	-4	8	-1	-5	-4	-3
2	0.14084	0	-4	-3	-4	-5	-4	-5	7	-5	-6	-6	-4	-5	-6	-5	-2	-4	-1	-6	-6	0	0	1	1	0	1.045	2.064	1.33	-0.384	1.652	0.16246	6	-4	-2	-4	-3	-3	-4	3	-4	-4	-4	-3	-4	-5	-4	1	-3
2	0.72022	1	0	0	2	-5	1	4	-1	0	-4	-4	1	-3	-5	-4	1	0	-5	-3	-2	0	0	1	0	1	1.57	-0.146	-0.733	-0.591	-1.302	0.72193	2	-3	1	-1	0	-1	0	-1	-1	-2	-3	-1	-2	-3	1	3	1
2	0.19921	-1	-1	-1	2	-3	1	4	-4	1	-3	-2	2	0	-3	-1	-2	1	-5	-2	-1	0	1	0	0	1	0.113	-0.837	1.477	1.357	-1.453	0.2129	-3	-5	-5	-4	-4	-3	-2	-5	-5	5	2	-4	1	1	-3	-4	-2
2	0.84032	0	-2	-2	-2	-3	0	3	-3	-2	-4	-2	1	0	1	-3	4	-1	-4	-3	-3	0	0	1	0	1	0.67	-2.647	-4.76	-0.228	1.399	0.84297	-2	-2	2	-2	-4	-1	1	3	7	-5	-5	1	-3	-4	-4	-2	0
2	0.90294	-2	-3	0	6	-5	-2	2	-1	-3	-4	-4	-3	1	-2	0	1	-2	-5	-4	-2	0	0	1	0	1	-0.259	-3.242	-3.656	1.05	0.302	0.91361	1	-3	1	4	-4	-2	2	2	-3	-2	-4	-2	-3	-4	-3	0	0
2	0.44327	-2	-2	6	-1	-3	-2	-2	0	-2	-1	-2	-1	-3	0	-3	0	-1	3	-3	-3	0	0	1	1	0	-0.169	0.933	1.299	0.945	0.828	0.34677	0	-4	2	-3	7	-1	-3	3	-3	-4	-2	-3	-4	-3	2	0	-3
2	0.68428	-1	0	1	0	-2	-1	-1	-1	-2	-1	0	1	-2	-2	5	0	-1	-2	-2	-1	0	0	1	0	1	0.421	-1.392	-1.628	0.189	2.081	0.6534	-1	-3	-2	-1	8	-1	-2	-1	1	1	0	-2	-2	-1	0	-1	-1
2	0.41948	-3	-3	2	6	0	1	1	-1	-3	-1	-4	-2	-4	-4	-3	-1	0	-4	-4	-3	1	0	0	1	0	-0.259	-3.242	-3.656	1.05	0.302	0.38266	-3	-4	-5	-5	-3	-4	-4	-5	-4	1	6	-4	0	1	-4	-4	-3
2	0.05549	-3	-4	-4	-4	2	-4	-2	-5	-4	2	5	-4	3	1	-4	-4	-3	-3	-3	1	1	0	0	1	0	1.266	-0.912	-1.505	-1.019	-0.987	0.063802	2	-3	0	6	-4	-2	2	-3	-1	1	-4	-2	-3	-4	-3	-2	-1
2	0.54972	-1	-2	-1	0	-1	0	-2	-2	1	-1	-4	-2	-3	-4	-3	5	2	-4	-3	-3	0	0	1	1	0	0.67	-2.647	-4.76	-0.228	1.399	0.53396	0	-3	0	2	-4	0	4	0	-3	-4	-3	0	-3	-4	1	1	1
2	0.57727	1	1	0	-2	-1	0	-2	-1	4	-3	-4	3	-3	-4	-3	2	1	-4	1	-1	1	0	0	0	1	-1.474	-0.078	-1.673	0.336	-0.417	0.58597	-2	-3	-4	-4	-1	-4	-4	-1	-1	0	-1	-2	2	4	-3	1	-1
2	0.39642	-2	2	4	1	-5	5	0	-4	3	-5	-1	1	-3	-5	-4	0	-3	-5	-4	-4	0	0	1	0	1	-0.503	-1.853	-3.005	0.931	-0.179	0.33481	-1	1	1	5	-5	0	3	-1	0	-5	-5	-1	-4	-4	0	0	-2
2	0.047528	-1	0	-2	2	-5	0	6	-1	-2	-5	-5	-1	-4	-5	-3	-1	-3	-5	-4	-4	1	0	0	1	0	0.113	-0.837	1.477	1.357	-1.453	0.053173	-2	-4	2	-4	-1	-3	-4	-3	-4	1	2	-3	0	0	2	2	-1
2	0.56299	0	-4	-4	-4	-3	-4	-4	-4	-4	4	3	-4	4	2	-4	0	0	-4	-3	1	1	0	0	1	0	0.393	0.816	2.131	-1.239	-0.547	0.58031	1	2	-1	1	-1	1	1	0	1	-2	-2	3	-3	-4	-4	0	-1
2	0.094036	-5	-5	-3	-6	-5	-4	-5	-5	-3	-4	-4	-5	0	0	-6	-5	-4	11	6	-4	1	0	0	1	0	-2.128	-0.184	0.672	-0.595	0.009	0.078529	-1	0	0	-3	3	1	-1	-2	3	0	-2	-2	0	-2	-4	1	4
2	0.13929	-3	4	0	-4	-4	1	-2	-4	-2	-2	-2	3	2	4	-4	-3	1	-3	2	-2	0	0	1	0	1	-1.005	1.212	2.219	-0.663	-1.524	0.12823	-3	0	4	5	-5	1	-1	2	1	-5	-5	-2	-4	-4	-4	-1	-3
2	0.67428	1	0	0	1	-4	1	3	-2	0	-3	-2	2	-3	-4	2	0	-1	-5	-4	-3	0	1	0	0	1	0.113	-0.837	1.477	1.357	-1.453	0.69642	0	4	-1	-1	2	-1	-1	-2	0	-2	-1	2	0	-4	-1	0	-1
2	0.76651	2	2	-1	0	-3	-1	-1	-3	3	-2	-2	3	-3	-4	-3	0	2	-4	-3	-2	0	0	1	0	1	1.57	-0.146	-0.733	-0.591	-1.302	0.7574	2	-2	-2	-2	-3	-1	-2	-1	-3	-1	-3	1	1	-3	-3	3	2
2	0.054278	-2	-5	-6	-6	-3	-5	-5	-6	-6	1	-2	-5	-2	-3	-5	-4	-3	-6	-4	7	1	0	0	1	0	1.242	-1.262	-0.544	-1.337	-0.279	0.044763	-3	-2	-3	-1	-6	0	8	-5	-3	-6	-6	-2	-5	-6	-4	-3	-3
2	0.47043	0	0	1	2	-3	1	4	0	0	-3	-3	0	-1	-3	-2	0	0	-4	-3	-2	0	0	1	0	1	0.113	-0.837	1.477	1.357	-1.453	0.54314	-2	-3	-3	-4	-2	-3	-4	-2	-3	4	1	-3	0	5	-3	-3	-2
2	0.41869	2	1	1	2	-3	2	2	-2	0	-4	-3	2	-3	-5	-3	0	-1	-5	-4	-3	0	0	1	0	1	0.113	-0.837	1.477	1.357	-1.453	0.41313	-3	-4	-5	-6	-3	-3	-5	-6	-3	1	4	-3	8	-1	-5	-4	-2
2	0.40782	1	-1	-3	2	-4	3	6	-2	-3	-5	-5	1	-4	-6	-4	-2	-1	-5	-3	-5	1	0	0	0	1	1.57	-0.146	-0.733	-0.591	-1.302	0.39512	-4	-1	-5	-5	-4	3	-4	-6	-4	-1	5	0	-1	3	-5	-4	-2
2	0.014926	-3	-5	-5	-6	-4	-2	-5	-5	-5	3	5	-5	4	-2	-5	-3	1	-5	-4	0	1	0	0	1	0	1.266	-0.912	-1.505	-1.019	-0.987	0.01817	-4	-5	-6	-6	-4	-5	-6	-6	-5	4	5	-5	2	1	-6	-5	-4
2	0.80127	0	0	0	0	-1	0	1	1	0	-1	-1	-1	-1	-1	0	1	0	-1	0	-1	0	0	1	0	1	0.113	-0.837	1.477	1.357	-1.453	0.82378	0	0	0	2	-1	1	1	0	1	-1	-1	-1	-1	-1	0	0	0
2	0.074054	5	-4	-4	-4	-1	-4	-4	-1	-4	-2	-2	-4	-2	-4	-4	2	1	-5	-4	1	1	0	0	1	0	1.57	-0.146	-0.733	-0.591	-1.302	0.060269	-4	-5	-6	-6	-4	-4	-6	-6	-5	0	3	-5	2	7	-6	-5	-4
2	0.049315	-3	-2	-4	-5	-2	-3	-5	-3	-1	-2	1	-3	-1	7	-6	-2	-2	8	-1	-3	0	0	1	1	0	-2.128	-0.184	0.672	-0.595	0.009	0.032599	0	1	0	-2	-2	-1	-1	2	-2	-3	-4	1	-2	-5	-4	4	2
2	0.07287	-2	-3	1	4	-2	-3	-1	-4	1	0	-3	-2	0	0	3	-2	-2	1	5	-3	0	0	1	1	0	-0.838	1.512	3.097	0.26	0.83	0.079466	0	5	-2	-3	-1	1	-2	-4	-3	0	-2	0	-2	-1	4	0	-3
2	0.16375	-3	-5	-5	-6	-3	-5	-5	-6	-5	1	2	-5	-1	-3	-5	-4	-2	-5	-3	6	0	1	0	1	0	1.266	-0.912	-1.505	-1.019	-0.987	0.19524	-1	-1	-1	-4	3	-3	-3	-4	0	-1	-1	1	3	-4	-4	-2	5
2	0.46947	-3	-4	-5	-5	-3	-2	-2	-6	-4	3	4	-4	3	-2	-5	-4	-2	-4	1	2	0	1	0	1	0	0.393	0.816	2.131	-1.239	-0.547	0.4869	-2	-3	-2	-3	1	2	2	-2	0	-1	-3	1	1	-4	0	3	3
2	0.14718	-3	2	-2	-2	-4	-2	1	-5	0	0	1	-1	1	3	-4	-2	-3	-3	2	3	0	1	0	1	0	-0.838	1.512	3.097	0.26	0.83	0.13797	-3	-5	-5	-5	1	-4	-5	-5	-5	5	-1	-4	1	2	1	-4	-1
2	0.53681	-2	0	-1	1	-4	3	3	1	-2	-4	-4	3	-3	-4	0	0	-2	-4	-3	-3	1	0	0	0	1	-0.503	-1.853	-3.005	0.931	-0.179	0.5404	-2	-2	-1	1	2	1	-2	-1	0	0	4	-1	1	-2	-3	-1	0
2	0.71951	-2	0	1	0	0	2	1	-1	-3	1	-3	2	1	-4	-2	3	-2	-2	-3	-3	1	0	0	0	1	0.67	-2.647	-4.76	-0.228	1.399	0.70694	-2	1	0	-1	-3	-2	-1	2	-1	1	0	-2	4	1	-3	-1	0
2	0.39863	-1	1	4	1	-1	0	-1	0	0	-3	-3	1	-1	-2	-4	3	0	-5	-4	-4	0	0	1	0	1	0.67	-2.647	-4.76	-0.228	1.399	0.40152	1	-2	1	2	-4	-1	-1	2	1	-4	-3	-1	-4	-5	-2	3	1
2	0.98757	0	0	-3	-3	-4	-1	0	1	1	-4	-4	-1	-4	-4	6	0	1	-4	-4	-4	0	0	1	0	1	0.421	-1.392	-1.628	0.189	2.081	0.98743	0	2	0	-1	0	3	-2	0	-3	-4	-2	-1	-3	-4	4	1	1
2	0.43995	-1	3	-1	-3	-3	1	1	-4	0	-1	-2	4	0	-1	-4	1	1	-3	-1	0	1	0	0	0	1	-0.277	1.648	0.533	1.831	-0.561	0.42361	-1	1	0	-1	-4	0	1	-2	0	-3	-3	1	-3	-4	6	-1	0
2	0.69666	-2	2	-1	-2	0	3	2	1	1	-2	-1	0	-2	-3	-2	0	0	0	-3	-1	1	0	0	0	1	-0.503	-1.853	-3.005	0.931	-0.179	0.694	1	-2	2	-2	-2	-2	2	-2	-3	-1	-1	-1	-3	-1	0	0	0
2	0.075995	-3	-2	0	0	-4	0	-1	-4	0	-3	-4	-1	-4	-5	7	0	1	-5	-4	-4	0	0	1	0	1	0.421	-1.392	-1.628	0.189	2.081	0.058296	-3	-1	3	3	-4	-2	0	-3	6	-4	-2	-2	-3	-4	2	1	-1
2	0.35897	-1	-4	-3	-3	-5	-4	-3	-4	-5	-5	-5	-3	-5	-6	8	-2	-3	-6	-6	-4	0	0	1	1	0	0.421	-1.392	-1.628	0.189	2.081	0.33225	2	-2	-1	4	-5	0	3	-3	-2	-4	-4	2	-4	-5	-1	1	0
2	0.4705	-2	-5	-5	-5	-4	-2	-3	-6	-5	4	0	-4	0	-2	-3	-3	1	-5	-2	5	0	0	1	1	0	0.393	0.816	2.131	-1.239	-0.547	0.46297	-1	-1	-1	0	-4	-2	-1	-3	-4	-4	-4	-3	-4	-4	2	6	1
2	0.46605	-2	5	2	1	-2	2	-2	-4	4	-4	-4	3	-2	-4	-4	-2	-2	-5	-2	-4	0	0	1	0	1	-1.474	-0.078	-1.673	0.336	-0.417	0.45409	0	-3	-3	-3	-3	-2	-2	-4	-1	-1	-1	-1	-2	5	-4	-1	-1
2	0.41683	-1	0	2	1	-4	-1	0	2	-2	-4	-3	1	0	-4	-3	4	-1	-4	-1	-4	0	0	1	0	1	0.67	-2.647	-4.76	-0.228	1.399	0.38693	-3	2	0	3	-5	0	2	-1	1	-5	-4	3	-4	-5	0	1	-3
2	0.56634	-1	-2	-2	-5	8	-4	-5	-5	-5	-2	2	-4	-1	-4	5	-2	-3	-5	-3	-2	0	0	1	1	0	-1.02	-0.255	-0.862	-1.343	0.465	0.47415	2	-1	-3	-5	-3	-3	-4	-4	-2	2	1	-3	-1	0	-4	0	1
2	0.33093	-1	-1	1	-1	1	1	0	4	-3	-4	-2	1	0	1	-3	-1	-2	-3	-2	-2	0	0	1	0	1	1.045	2.064	1.33	-0.384	1.652	0.30654	-3	-1	2	5	-2	-1	1	-3	-1	0	-1	1	1	-4	-3	-1	-2
2	0.64181	1	-1	1	-1	1	0	-1	2	1	-1	-1	-1	1	0	-1	-1	-1	4	0	-1	0	0	1	0	1	1.57	-0.146	-0.733	-0.591	-1.302	0.67605	-1	-1	1	-2	0	2	-1	-2	3	-1	-3	1	2	0	1	2	-1
2	0.49711	-1	0	0	0	3	1	0	-1	2	0	-1	0	2	1	0	-1	0	-5	1	-1	0	1	0	1	0	0.67	-2.647	-4.76	-0.228	1.399	0.48161	-1	0	-4	0	3	-4	0	-1	-4	0	-1	0	2	1	0	0	0
2	0.21352	2	-2	2	-3	2	0	-2	-3	-2	0	-4	-3	-1	0	6	-1	-3	-4	-3	-3	0	0	1	1	0	0.421	-1.392	-1.628	0.189	2.081	0.23192	-3	-3	-6	-6	1	-5	-3	-4	-5	1	5	-5	2	5	-6	-5	-2
2	0.2447	-1	1	-3	-3	1	3	0	-2	1	0	0	3	3	-4	-3	-1	-1	-4	-3	-1	1	0	0	0	1	-0.503	-1.853	-3.005	0.931	-0.179	0.28631	-2	0	4	2	-4	0	1	1	3	-4	-4	-2	0	-4	-3	2	-2
2	0.1001	-4	-5	-6	-6	-4	-5	-6	-6	-6	7	2	-5	-1	-3	-5	-5	-3	-5	-4	3	0	1	0	1	0	0.393	0.816	2.131	-1.239	-0.547	0.094203	-3	6	-4	-5	-3	-2	-3	-5	-3	-2	3	-1	0	-2	-5	-3	-2
2	0.1962	2	-3	-2	-3	-2	-2	-2	-2	-3	-2	0	-2	-2	-3	-2	2	5	-4	-3	-2	1	0	0	1	0	0.908	1.313	2.213	-0.032	0.326	0.2169	0	-4	-4	-5	-2	-4	-4	-4	-4	3	1	-4	-1	2	-4	-3	-2
2	0.3299	-1	-4	-4	-5	3	-4	-4	-5	-4	5	1	-4	4	-2	-4	-3	0	-4	-3	2	1	0	0	1	0	0.393	0.816	2.131	-1.239	-0.547	0.29698	3	-3	-2	-3	-3	-2	-3	2	-3	-3	-3	-2	2	-4	-3	3	3
2	0.083068	0	-2	0	4	1	-1	0	0	-1	-3	-4	-1	-1	-5	-3	1	4	0	-2	-3	0	0	1	0	1	1.57	-0.146	-0.733	-0.591	-1.302	0.07736	0	-1	0	3	-6	0	2	0	0	-5	-4	2	-1	-3	2	0	-1
2	0.19476	0	1	0	0	-3	3	3	-1	1	-4	-3	0	-3	-5	-2	2	-1	-5	-2	-3	1	0	0	0	1	0.113	-0.837	1.477	1.357	-1.453	0.13723	1	1	0	1	-2	0	2	-3	-1	-2	0	2	0	-2	-4	1	0
2	0.045997	-3	-4	-5	-5	-2	-4	-5	-5	-5	2	5	-5	0	-1	-4	-3	-1	-4	-3	3	0	1	0	1	0	1.266	-0.912	-1.505	-1.019	-0.987	0.031691	-2	-2	-2	4	-3	-3	-2	-3	0	-1	-3	0	-2	0	-3	-2	-2
2	0.23937	-1	-1	-2	-3	-3	-4	-4	7	-4	-5	-6	-2	-5	-5	-4	-1	-2	-5	-5	-3	0	0	1	1	0	1.045	2.064	1.33	-0.384	1.652	0.24672	-3	4	-3	-1	-4	0	-1	-3	-1	0	2	1	-1	2	-4	-2	-3
2	0.37688	-2	-2	-3	-3	-4	-3	-3	-2	-3	1	3	-1	6	-1	-1	-2	-2	-4	0	2	0	0	1	1	0	1.266	-0.912	-1.505	-1.019	-0.987	0.28192	0	1	2	1	-3	3	0	-1	2	-4	-4	1	0	-5	-2	2	1
2	0.13654	1	-5	-5	-5	3	-4	-5	-5	-5	0	-1	-4	-1	-2	-4	-3	-2	-5	-1	6	0	1	0	1	0	1.242	-1.262	-0.544	-1.337	-0.279	0.12461	6	-4	-4	-4	-2	-3	-3	-2	-4	-4	-4	-3	-3	-4	-1	0	-2
2	0.32993	-2	-5	-5	-5	-3	-5	-5	-4	-5	6	2	-5	1	-2	-5	-4	-2	-5	-3	2	1	0	0	1	0	1.266	-0.912	-1.505	-1.019	-0.987	0.30565	-2	3	-1	-2	-4	5	0	-4	-2	2	1	0	-1	-3	-4	-1	-2
2	0.65082	-1	-3	-2	-3	-2	-3	-3	2	-3	-4	-5	-3	-4	-5	-3	6	1	-5	-4	-4	0	0	1	1	0	1.045	2.064	1.33	-0.384	1.652	0.64742	0	1	0	0	-2	0	-1	-3	-1	-4	-2	5	-3	-5	2	0	-1
2	0.33988	-2	-4	-3	-3	-5	-4	-4	7	-4	-6	-6	-3	-5	-5	-4	-2	-4	-5	-5	-5	0	0	1	1	0	1.045	2.064	1.33	-0.384	1.652	0.28747	3	-3	0	-3	-3	-3	-3	-1	-3	-3	-3	-1	-3	-4	-3	4	2
2	0.022511	-4	-3	-2	-4	-2	-2	-4	-5	-1	-4	-3	-4	-3	0	-5	-3	-3	-1	9	-3	0	0	1	1	0	-0.838	1.512	3.097	0.26	0.83	0.026396	-1	-1	-1	-3	-1	-1	-1	-3	-3	2	3	0	-1	-2	1	-1	0
2	0.21102	0	-2	-1	-4	6	3	-1	2	0	-2	0	-3	3	-2	-4	1	-1	-5	-4	-2	0	0	1	1	0	-1.02	-0.255	-0.862	-1.343	0.465	0.1712	1	-4	-4	-5	2	-1	-4	-2	0	2	0	-4	1	-1	3	0	-1
2	0.009278	-3	7	-2	-4	6	-2	-4	-4	-4	-5	-5	-1	1	-4	-5	2	-2	-6	-4	-5	0	0	1	1	0	0.44	2.897	1.502	1.538	-0.055	0.00941	1	-2	-4	-3	-4	-3	0	-5	-1	-1	-1	-3	2	-3	6	-3	-1
2	0.015984	-3	-3	-2	-4	-5	-2	-3	-5	11	-6	-5	-3	-4	-4	-5	-3	-4	-5	-1	-5	1	0	0	1	0	-1.474	-0.078	-1.673	0.336	-0.417	0.016513	-1	-5	-5	-6	-2	-4	-5	-4	-6	6	-1	-5	2	-3	-5	-2	-2
2	0.12812	-1	1	1	3	-6	-1	4	-3	2	-5	-5	1	-3	-5	-2	1	1	-4	-5	-5	1	0	0	0	1	0.908	1.313	2.213	-0.032	0.326	0.11375	-2	-5	-2	-4	-4	-5	-5	-5	-5	3	1	-5	-1	-3	-5	-1	4
2	0.19623	-4	-5	-5	-6	-5	-5	-5	-6	-2	1	2	-5	1	3	-6	-5	-4	-2	8	-1	1	0	0	1	0	1.266	-0.912	-1.505	-1.019	-0.987	0.15987	0	2	-1	-3	-1	0	-3	1	-3	1	0	3	-1	-4	-4	1	0
2	0.47896	-2	1	4	-2	-3	1	0	-4	4	0	0	3	-1	-2	-4	-2	-2	-5	0	-2	0	0	1	0	1	-0.277	1.648	0.533	1.831	-0.561	0.44129	-2	-2	3	-1	-4	-1	-2	6	-1	-5	-5	0	-4	-5	-3	-1	-2
2	0.39548	0	0	0	2	-5	1	3	0	-1	-4	-4	3	-3	-5	1	1	-1	-5	-4	-3	0	0	1	0	1	-0.277	1.648	0.533	1.831	-0.561	0.35672	1	-3	0	0	-2	-2	0	4	0	-4	-2	0	-2	-3	-1	0	0
2	0.21674	4	-4	-3	-3	-1	-3	-4	4	-1	-4	-1	-4	1	-1	-4	0	-3	1	-3	-2	1	0	0	1	0	1.57	-0.146	-0.733	-0.591	-1.302	0.24501	-3	-4	-4	-6	-4	0	-5	-4	-4	-1	1	-3	10	-1	-5	-3	-4
2	0.099395	4	-1	-2	-1	1	0	-1	-1	1	-2	-2	0	-2	-3	-2	0	-1	-5	-4	0	1	0	0	0	1	1.57	-0.146	-0.733	-0.591	-1.302	0.09174	-3	-4	-3	-6	1	-4	-5	-4	0	1	1	-5	-2	6	-4	-4	-4
2	0.0408	-2	6	-3	-4	-5	-1	-2	-3	-3	2	-2	1	0	-4	-4	-3	-1	-5	-3	-1	1	0	0	1	0	0.908	1.313	2.213	-0.032	0.326	0.043014	4	-3	0	0	-2	3	-2	-2	-3	-4	-3	-2	-3	-5	-3	3	0
2	0.085272	-3	-2	1	7	-5	-1	1	-2	-2	-4	-5	-1	-4	-5	-2	-1	-2	-5	-4	-4	1	0	0	0	1	-0.259	-3.242	-3.656	1.05	0.302	0.078059	-2	-1	0	-2	-4	0	-1	-3	9	-4	-4	-1	-2	-2	-3	-2	-3
2	0.4274	-3	-3	3	7	-5	-2	1	-2	-1	-5	-5	-2	-5	-5	-3	0	0	-6	-5	-5	0	0	1	0	1	-0.259	-3.242	-3.656	1.05	0.302	0.39494	-3	-3	-3	1	-4	-2	4	-2	-2	-3	-3	-1	-3	5	-4	-2	-2
2	0.034798	2	7	-3	-3	1	-2	-2	-4	-3	-2	-4	-1	-3	-5	-1	-1	-1	-5	-4	-4	1	0	0	0	1	1.57	-0.146	-0.733	-0.591	-1.302	0.030938	-4	-3	8	-1	-4	-2	-3	-3	-1	-5	-2	-2	-4	-5	-4	-1	1
2	0.89542	0	0	-1	2	-4	-1	1	0	-3	-2	-1	0	-3	-2	2	2	0	-4	-3	-2	0	0	1	1	0	1.57	-0.146	-0.733	-0.591	-1.302	0.8979	0	-2	-2	-2	5	-3	-2	2	-3	-1	0	-3	4	-1	-1	1	-2
2	0.90605	0	-4	-4	-3	-5	-2	0	-4	0	-5	-4	-1	-4	-5	8	-2	-2	-5	-2	-4	1	0	0	1	0	0.421	-1.392	-1.628	0.189	2.081	0.89444	-3	-1	0	1	-5	0	7	-2	-2	-5	-3	0	-4	-5	-3	-2	-3
2	0.073033	0	-2	3	0	-4	2	-2	4	-3	-2	-3	-3	-1	-1	0	1	-3	0	-1	-4	0	1	0	1	0	1.57	-0.146	-0.733	-0.591	-1.302	0.070483	0	-4	-5	-5	-3	-4	-4	-5	-5	3	0	-4	-2	-3	-4	-2	-2
2	0.51005	0	0	2	0	-4	1	1	-2	-3	1	-2	-1	-3	-1	-3	0	2	-5	-3	2	0	1	0	1	0	0.67	-2.647	-4.76	-0.228	1.399	0.53043	-2	1	-3	-3	-4	-2	-3	-4	1	3	3	-4	2	1	-3	-2	-2
2	0.65353	0	1	1	-3	-4	-1	-2	-4	-3	-3	-3	3	2	-4	3	0	-1	-5	-4	1	0	0	1	0	1	-0.277	1.648	0.533	1.831	-0.561	0.64944	0	-5	-5	-5	10	-5	-5	-5	-5	-3	-1	-5	-3	-4	-5	-2	-3
2	0.76357	0	-1	0	2	-4	-3	-1	4	-2	-4	-4	-2	-3	-1	-3	0	0	-4	0	-3	0	0	1	0	1	1.045	2.064	1.33	-0.384	1.652	0.77448	-2	6	0	-1	-5	0	2	-2	1	-5	-4	-1	-4	-4	-4	-2	-2
2	0.77448	-2	6	0	-1	-5	0	2	-2	1	-5	-4	-1	-4	-4	-4	-2	-2	-4	0	-4	0	0	1	1	0	0.44	2.897	1.502	1.538	-0.055	0.77854	-3	-3	-4	-3	11	-5	-5	-4	-5	-3	-2	-5	-4	-4	-5	-3	-1
2	0.82192	-2	-1	-1	5	-5	1	3	-3	2	-4	-4	0	-1	-5	-4	0	0	-5	-4	-2	0	0	1	0	1	-0.259	-3.242	-3.656	1.05	0.302	0.84734	-3	-1	-4	-4	10	-4	-4	-4	-3	0	-3	-4	-3	-3	-1	-3	-3
2	0.86813	-2	-1	2	-2	-3	-2	-1	-2	2	-2	-3	-1	-2	0	-2	1	4	-3	-1	-2	0	0	1	0	1	0.908	1.313	2.213	-0.032	0.326	0.86618	-2	-3	0	0	-3	-2	-2	6	-3	-3	-3	-2	-3	-3	-3	-2	-2
2	0.82302	-2	-4	-5	-5	-4	-4	-5	-2	-3	-1	0	-2	0	7	-5	-4	-4	-1	5	0	0	1	0	1	0	-0.397	0.412	1.891	-1.006	-0.59	0.79246	-3	2	4	0	-5	2	2	-3	-2	-2	-4	0	0	0	-1	1	-2
2	0.76333	-3	-2	0	-4	-4	3	-3	-4	4	-3	-1	1	6	2	-4	-3	0	2	4	-3	0	1	0	0	1	-0.838	1.512	3.097	0.26	0.83	0.79244	0	0	-2	1	-4	-1	5	-1	0	1	-3	-2	-3	-4	1	-1	-1
2	0.56315	-3	-1	5	4	-5	0	-2	-3	5	-5	-5	-3	-4	-4	-4	0	2	-5	1	-4	0	0	1	1	0	-0.169	0.933	1.299	0.945	0.828	0.54081	4	-1	0	-2	-3	1	-1	-3	-3	-4	-1	-1	-3	-5	-3	4	-1
2	0.93808	-1	1	1	-3	-4	0	1	-1	0	-4	-4	3	-4	-3	-3	4	1	-5	-4	-2	0	0	1	0	1	0.67	-2.647	-4.76	-0.228	1.399	0.94268	-3	-5	-5	-5	11	-5	-5	-5	-5	-3	1	-5	-1	-1	-5	-3	-1
2	0.94428	-4	-3	-5	-5	-4	-4	-5	-5	-3	-1	0	-4	-2	6	-5	-4	-2	3	6	3	0	1	0	1	0	1.242	-1.262	-0.544	-1.337	-0.279	0.94263	-3	1	3	-2	-4	2	-1	-4	-2	1	-1	3	-1	0	-4	3	-1
2	0.47042	2	-2	2	1	-3	1	0	-2	-2	1	0	-1	-2	-3	-1	0	-2	-3	-3	0	0	0	1	0	1	0.393	0.816	2.131	-1.239	-0.547	0.4697	-2	-3	-2	-3	-3	-3	-3	3	-3	-1	-3	-3	-3	-2	-3	2	5
2	0.24524	2	1	-3	-2	-4	2	2	-3	-3	-4	-4	3	-4	-5	-3	2	0	-5	-4	-2	1	0	0	0	1	-0.503	-1.853	-3.005	0.931	-0.179	0.20411	-3	-5	-5	-5	11	-5	-5	-4	-5	-3	-3	-5	-4	-4	-5	-3	-3
2	0.33526	-3	-3	-4	-4	2	-2	-2	-4	-1	-3	-2	-3	-3	2	1	-3	-3	-1	8	-1	0	0	1	1	0	-0.838	1.512	3.097	0.26	0.83	0.33751	3	-3	2	-3	-3	-1	0	-1	-3	-2	-3	-2	-1	-2	4	1	0
2	0.35641	-1	2	-3	-1	-4	3	3	-4	2	-1	-1	1	0	-4	-4	-2	-3	-4	-1	3	0	0	1	0	1	-1.474	-0.078	-1.673	0.336	-0.417	0.36436	0	2	-3	-3	-4	-2	0	-4	0	-3	0	2	3	-4	5	-1	0
2	0.39595	-1	1	0	0	-4	1	-1	1	5	-1	1	0	-3	0	-4	-3	0	-4	2	-1	0	0	1	0	1	-0.838	1.512	3.097	0.26	0.83	0.42317	0	0	0	-4	-4	-3	-4	4	2	-4	-2	0	2	-5	-4	1	2
2	0.32015	-1	1	0	1	-4	2	2	-1	-2	-3	-4	4	-1	-4	-3	-2	-1	-4	-4	-1	0	0	1	0	1	-0.277	1.648	0.533	1.831	-0.561	0.2884	-1	-4	-2	1	-4	-3	-3	6	-4	-5	-5	-3	-4	-4	-4	-2	-3
2	0.25417	2	-2	2	2	-3	0	2	4	-2	-4	-4	-1	-4	-4	-3	0	-2	-4	-4	-3	0	0	1	1	0	1.045	2.064	1.33	-0.384	1.652	0.21509	-3	-5	-5	-6	-4	-4	-6	-6	-6	7	-1	-5	1	-2	-5	-4	-3
2	0.22123	-1	-2	-1	-3	-1	-2	-3	-5	-2	3	4	-1	2	0	-4	-3	-3	1	1	1	1	0	0	1	0	1.242	-1.262	-0.544	-1.337	-0.279	0.2379	0	-4	-4	-5	3	-3	-3	-4	-3	0	4	-3	0	2	-4	-1	-2
2	0.055218	-1	-3	-2	-3	-3	-3	-3	-2	-3	-5	-5	-3	-4	-5	-3	7	1	-5	-4	-4	0	0	1	1	0	0.67	-2.647	-4.76	-0.228	1.399	0.049461	-4	-4	0	8	-6	-3	-1	-4	-4	-6	-6	-3	-6	-6	-4	-3	-4
2	0.01262	-3	-5	4	-4	-4	-4	-5	-5	-4	6	0	-4	-1	-2	-5	-4	-3	-5	-4	2	0	1	0	1	0	0.393	0.816	2.131	-1.239	-0.547	0.013111	-5	-5	-6	-7	-1	-5	-5	-5	-4	-5	-4	-5	-1	3	-6	-5	-5
2	0.21035	-1	-1	-2	-1	-1	6	-2	-3	-2	-1	-1	-2	-2	-3	-2	2	1	2	-2	-1	0	1	0	1	0	-0.503	-1.853	-3.005	0.931	-0.179	0.21425	3	-2	-1	-3	-4	1	-2	3	2	-4	-4	-2	-4	-4	-3	3	-1
2	0.027987	-2	-2	-4	-4	-6	-3	-2	-5	-3	-5	-6	-1	-5	-6	8	-2	-4	-7	-6	-5	0	0	1	0	1	0.421	-1.392	-1.628	0.189	2.081	0.024259	-3	-3	2	-3	-5	-2	-4	7	0	-7	-6	-2	-6	-6	-5	-2	-2
2	0	0	0	0	0	0	0	0	0	0	0	0	0	0	0	0	0	0	0	0	0	0	0	0	0	0	0	0	0	0	0	0.64794	-1	-3	-4	-4	-2	-2	-3	-4	-3	1	1	-3	6	-1	-3	-3	-1
2	0.68286	-2	-2	0	-2	-4	-3	0	-4	0	1	-1	2	1	-2	-3	1	4	3	-4	1	0	0	1	0	1	0.908	1.313	2.213	-0.032	0.326	0.68145	2	-1	-4	-2	4	-2	-2	-2	-2	2	-2	-1	0	-3	-4	0	-1
2	0.47435	-1	1	-2	0	4	-2	-4	-2	-1	1	0	0	-1	2	-1	2	-1	-4	3	-2	1	0	0	1	0	0.393	0.816	2.131	-1.239	-0.547	0.48508	-1	0	1	-2	2	1	0	-3	2	-2	-2	2	-1	-1	4	0	0
2	0.42562	-4	5	-4	-2	1	1	-3	-3	1	-1	0	2	-1	-5	0	-1	-3	-1	-2	0	0	1	0	1	0	0.44	2.897	1.502	1.538	-0.055	0.42391	-4	0	6	-2	7	-1	-2	-4	-3	-5	-2	-1	0	-6	-5	1	-1
2	0.30291	-1	0	-1	-3	4	0	-2	1	-4	-1	-1	0	2	1	1	0	2	3	1	-1	0	1	0	1	0	-0.397	0.412	1.891	-1.006	-0.59	0.32327	0	0	2	3	5	0	-2	-3	-3	-3	-2	3	-2	0	-3	-1	0
2	0.50983	-2	-2	1	-2	4	-4	-1	0	-4	3	0	-1	-3	-1	-5	-1	0	-5	0	2	0	0	1	1	0	0.908	1.313	2.213	-0.032	0.326	0.50778	0	1	-2	0	2	0	-1	0	3	-3	-5	1	-4	-5	5	0	-2
2	0.62748	-1	1	0	1	-4	0	-2	-2	-1	0	-3	3	1	-4	0	0	3	-4	-2	-1	0	0	1	0	1	0.908	1.313	2.213	-0.032	0.326	0.63172	2	-1	-1	-4	4	-1	-2	-1	1	-1	-1	0	-1	-2	2	-2	0
2	0.65771	0	-1	1	0	-4	2	-1	-2	2	1	0	-1	-3	-1	1	1	0	-4	0	0	1	0	0	0	1	-0.503	-1.853	-3.005	0.931	-0.179	0.66716	1	-2	-1	1	-4	1	-1	-1	-2	-4	-1	2	-2	0	3	1	0
2	0.34578	-1	-1	2	1	-3	0	-1	3	2	-2	-1	-1	-2	-1	-1	0	0	3	-2	-2	0	0	1	0	1	-1.474	-0.078	-1.673	0.336	-0.417	0.40056	-1	4	0	-1	-2	-1	0	0	-1	-1	-2	1	-2	-1	1	0	0
2	0.16697	-3	-3	-2	-3	-4	-2	-3	-4	9	-4	-1	-3	-2	2	-1	0	-3	-4	1	-3	0	1	0	1	0	-0.397	0.412	1.891	-1.006	-0.59	0.097546	-2	-2	-3	-1	-4	-2	-4	-4	0	2	1	0	-1	5	-5	-2	0
2	0.50452	0	5	-2	-2	-3	2	-1	-3	-2	-3	-1	3	-2	-3	-3	-1	2	-3	-3	-3	0	0	1	1	0	0.44	2.897	1.502	1.538	-0.055	0.49474	-2	5	-2	-2	2	-1	0	-3	-1	-2	-2	-1	1	1	-2	-2	-2
2	0.082417	-3	-5	-6	-6	-4	-5	-5	-6	-5	-1	6	-5	2	-2	-5	-5	-4	-4	-4	1	0	1	0	1	0	1.266	-0.912	-1.505	-1.019	-0.987	0.082197	-3	-5	-6	-6	-4	-5	-5	-6	-5	2	5	-5	5	-2	-5	-5	-4
2	0.61119	4	-3	-3	-2	-1	-3	-2	-2	-3	-1	-1	-3	0	-2	-2	-1	-2	-3	-3	4	0	0	1	1	0	1.57	-0.146	-0.733	-0.591	-1.302	0.54654	-1	1	1	-2	-3	2	0	-3	-1	1	-1	1	-2	-2	-1	0	2
2	0.49491	-3	-4	-3	-4	-4	-4	-3	0	1	-1	1	-3	0	2	-2	0	-2	-2	7	-2	0	0	1	1	0	1.266	-0.912	-1.505	-1.019	-0.987	0.48786	-1	-1	4	2	-3	0	-1	4	-1	-4	-5	1	-4	-5	-1	0	-2
2	0.16943	-3	0	0	-3	-4	3	0	-4	2	-4	-4	2	-3	0	-4	-2	-3	8	5	-4	0	0	1	0	1	-0.838	1.512	3.097	0.26	0.83	0.17516	-3	-4	-4	-4	10	-4	-4	1	-4	-3	-3	-1	-3	-4	-4	-3	-3
2	0.57841	0	-4	-4	-1	4	-1	-2	-4	-4	-2	2	-4	1	-3	0	-1	2	-4	-4	3	0	0	1	0	1	1.242	-1.262	-0.544	-1.337	-0.279	0.56376	0	2	0	1	-4	0	1	0	3	-1	-2	-2	-3	-4	4	-1	0
2	0.55043	1	4	-1	-1	-4	0	0	-1	-2	-4	-2	-1	-3	-3	-4	3	0	-4	0	-4	0	0	1	0	1	0.67	-2.647	-4.76	-0.228	1.399	0.5424	-3	-2	5	0	-4	0	3	-3	-3	-3	-4	0	-4	-5	2	2	1
2	0.19104	-4	-5	-6	-6	-4	-5	-5	-6	-5	1	6	-5	0	-1	-5	-5	-4	-4	-4	1	1	0	0	1	0	1.266	-0.912	-1.505	-1.019	-0.987	0.16537	-3	-5	-6	-6	-4	-5	-5	-6	-6	3	2	-5	0	-3	-5	-4	-3
2	0.19719	4	0	-3	-3	-4	2	2	-3	-2	-2	-2	2	-3	-5	-3	1	-2	-5	-2	-2	0	1	0	0	1	-0.277	1.648	0.533	1.831	-0.561	0.22324	-3	7	-3	-4	-6	-2	-3	-5	-3	-3	-4	3	1	-5	-4	-3	-4
2	0.49213	-3	-4	-5	-5	-2	-4	-4	-5	-4	0	6	-4	3	-2	-3	-3	-3	-4	-3	-1	0	0	1	1	0	-1.005	1.212	2.219	-0.663	-1.524	0.38743	-1	3	-1	-2	0	1	1	-4	-2	-1	-3	4	-3	-4	-4	-2	3
2	0.087552	0	1	3	2	-4	1	1	-2	6	-4	-3	-1	-2	-3	-4	1	1	-5	-1	-4	0	0	1	0	1	1.57	-0.146	-0.733	-0.591	-1.302	0.063554	-2	1	-1	-2	-4	0	-3	6	-1	-6	-5	0	-4	-4	-4	-2	-3
2	0.030319	-4	-5	-3	-3	-2	-4	-4	-5	1	-2	-2	-5	-1	8	-6	-4	-4	4	4	-2	0	0	1	1	0	-1.474	-0.078	-1.673	0.336	-0.417	0.041358	1	-3	-1	0	-1	-2	0	-2	-3	-4	-5	-3	-4	-5	-3	5	3
2	0.066359	-4	-4	-4	-4	-5	-4	-4	-5	-1	-4	-3	-4	-3	1	-5	-4	-4	0	10	-4	0	0	1	1	0	-0.838	1.512	3.097	0.26	0.83	0.054149	-4	-4	-5	-5	-1	-4	-5	-5	-4	-1	5	-4	0	-2	5	-4	-3
2	0.20588	0	-1	-3	0	-3	-3	-3	-4	-1	-3	0	-3	4	3	-2	3	1	3	0	-3	1	0	0	1	0	0.67	-2.647	-4.76	-0.228	1.399	0.14411	-4	0	-5	-6	-4	-4	-5	-5	-3	-3	1	-3	-1	1	-5	-4	-4
2	0.14411	-4	0	-5	-6	-4	-4	-5	-5	-3	-3	1	-3	-1	1	-5	-4	-4	11	4	-4	1	0	0	1	0	-2.128	-0.184	0.672	-0.595	0.009	0.11701	1	1	-3	-4	4	-3	-4	4	-4	0	2	-3	2	-3	-2	-2	-2
2	0.55111	0	-1	-1	3	0	0	2	0	2	-2	-3	0	0	-2	-1	1	-1	1	-1	-2	0	0	1	0	1	0.113	-0.837	1.477	1.357	-1.453	0.46	2	-1	0	1	-5	1	-1	0	1	-2	-2	-1	0	-1	0	1	0
2	0.23458	-3	-4	-4	-4	-3	-4	-4	-4	-3	1	4	-1	1	6	-4	-4	-3	-2	1	-1	0	1	0	1	0	1.266	-0.912	-1.505	-1.019	-0.987	0.23269	-3	-2	2	6	-5	0	3	-2	-1	-4	-4	-1	-2	-1	-2	-2	-2
2	0.16493	-4	-1	-4	-6	-5	-4	-5	-5	-4	-2	-1	-3	-3	2	-6	-3	0	11	1	-3	0	1	0	1	0	-2.128	-0.184	0.672	-0.595	0.009	0.18677	-1	-5	-6	-6	-4	-5	-5	-6	-6	5	1	-5	0	-1	-5	-4	-3
2	0.26929	0	-1	1	3	-5	1	4	-1	-1	-4	-5	1	-4	-5	-4	1	-1	2	-4	-2	1	0	0	0	1	1.57	-0.146	-0.733	-0.591	-1.302	0.31358	-3	-5	-6	-6	-4	-5	-5	-6	-4	-2	2	-5	2	8	-3	-5	-4
2	0.65074	-1	-1	-1	-1	0	-1	-2	0	0	1	1	0	0	0	0	0	-1	2	1	0	0	0	1	1	0	1.266	-0.912	-1.505	-1.019	-0.987	0.66867	-1	0	2	2	-1	2	0	1	0	-1	-3	-1	-1	-2	2	0	0
2	0.51629	-1	0	0	0	3	1	0	-1	2	0	-1	0	2	1	0	-1	0	-5	1	-1	0	0	1	0	1	1.045	2.064	1.33	-0.384	1.652	0.49634	0	0	0	-1	0	1	-2	-1	-1	0	-1	1	1	2	0	0	0
2	0.042426	5	-4	-4	-4	-3	-3	-4	3	-4	-4	-4	-1	2	-5	-3	-1	1	-5	-4	-2	0	1	0	1	0	1.57	-0.146	-0.733	-0.591	-1.302	0.040632	-4	-5	-5	-4	-4	-5	-5	-5	-4	2	1	-5	1	6	-5	-4	-3
2	0.20695	-1	-2	0	-3	-5	6	-2	-2	-1	-3	3	0	-1	-4	-2	1	0	-5	-2	-3	1	0	0	1	0	-0.503	-1.853	-3.005	0.931	-0.179	0.15711	-3	-3	-3	-4	2	-4	-4	-5	4	-4	-4	-4	-4	2	-5	-1	-4
2	0.93271	-1	-1	-1	1	-4	2	6	-3	-1	-4	-3	0	-3	-4	-2	-1	-1	-3	-3	-3	0	1	0	1	0	0.113	-0.837	1.477	1.357	-1.453	0.93039	-2	-2	-3	-4	-3	-2	-3	-4	1	-2	-2	-2	-1	3	-4	-2	-2
2	0.70897	5	-1	-2	-3	-1	-2	-1	-2	-3	-2	-3	0	-3	0	-3	1	0	-4	-3	-1	0	0	1	1	0	1.57	-0.146	-0.733	-0.591	-1.302	0.79465	4	-3	0	-3	-3	0	-1	2	-3	-2	-2	-2	-2	-4	-2	3	-1
2	0.55307	-3	-4	1	-4	-4	-1	-1	-2	-2	2	4	-1	0	0	3	-4	-3	-4	-3	0	0	0	1	1	0	1.266	-0.912	-1.505	-1.019	-0.987	0.56691	0	2	-3	-2	-4	2	-2	0	-3	-3	-3	-1	-3	4	2	2	-2
2	0.56691	0	2	-3	-2	-4	2	-2	0	-3	-3	-3	-1	-3	4	2	2	-2	-3	-2	-1	0	0	1	0	1	0.44	2.897	1.502	1.538	-0.055	0.57413	-1	-3	0	4	-4	2	3	-3	-3	-4	-4	1	-3	-4	3	0	-2
2	0.53587	-3	-6	-5	-6	11	-6	-6	-5	-6	-4	-4	-6	-4	-5	-5	-3	-3	-5	-5	-3	1	0	0	1	0	-1.02	-0.255	-0.862	-1.343	0.465	0.57725	2	-2	1	2	-4	-1	2	0	-2	-4	-2	1	-4	-5	-4	2	1
2	0.24122	0	1	-2	-1	-4	-1	3	1	3	-5	-3	2	-4	-5	-2	1	2	-5	-4	-4	1	0	0	0	1	0.113	-0.837	1.477	1.357	-1.453	0.25335	-3	-6	-5	-6	11	-5	-6	-5	-5	-3	-4	-5	-4	-5	-5	-3	-3
2	0.64927	-3	-2	-1	-3	-4	5	0	-4	3	-3	2	2	0	0	-2	-1	-3	-4	-1	-3	1	0	0	0	1	-0.503	-1.853	-3.005	0.931	-0.179	0.63939	0	-1	0	5	2	-2	2	-3	-3	-5	-5	1	-4	-5	-3	3	-1
2	0.45682	0	1	2	0	-5	1	2	-3	2	-2	-2	2	-4	-5	-2	2	0	-5	-1	-2	1	0	0	0	1	-0.259	-3.242	-3.656	1.05	0.302	0.43791	-1	0	0	1	-5	-1	4	-1	2	-5	-1	2	-4	-1	-2	1	-3
2	0.37136	-2	3	0	0	-5	0	3	-1	4	-4	-4	3	-1	-4	-3	-2	-3	-4	-3	-1	1	0	0	0	1	0.44	2.897	1.502	1.538	-0.055	0.36608	-2	2	1	2	-4	2	0	-3	3	-4	-4	4	-3	-4	-3	0	-1
2	0.61466	-3	0	2	3	-5	-1	3	2	-3	2	-4	1	-4	-5	-4	-1	-3	-5	-2	-3	1	0	0	0	1	-0.259	-3.242	-3.656	1.05	0.302	0.62188	-1	-1	0	3	-5	1	2	-1	-1	-4	0	0	1	-2	-4	0	-1
2	0.77565	-1	-1	1	-1	-4	1	-1	-2	0	-3	2	2	-2	0	0	-2	1	3	0	-1	1	0	0	0	1	-0.277	1.648	0.533	1.831	-0.561	0.78651	-2	2	1	0	-4	-2	-2	-3	2	-4	-1	-1	-2	-4	-2	4	3
2	0.78651	-2	2	1	0	-4	-2	-2	-3	2	-4	-1	-1	-2	-4	-2	4	3	-5	-4	-3	0	0	1	1	0	0.908	1.313	2.213	-0.032	0.326	0.79426	1	-3	-2	0	-4	-3	-1	-2	-4	-1	-4	0	-4	1	5	2	2
2	0.86901	2	-4	-2	4	-4	0	2	-3	-2	-4	-2	-3	-4	-5	4	-2	-1	-6	-5	0	0	0	1	0	1	0.113	-0.837	1.477	1.357	-1.453	0.86393	-1	-1	-1	3	-4	1	3	-2	0	1	-1	-1	-3	-4	-4	0	0
2	0.74876	-2	1	-2	0	-5	1	4	-1	-3	-5	-4	5	-4	-5	-4	0	-1	-5	-4	-4	1	0	0	0	1	-0.277	1.648	0.533	1.831	-0.561	0.75031	-3	-6	-5	-6	11	-5	-6	-5	-6	-4	-4	-6	-4	-5	-5	-3	-3
2	0.15686	2	-4	-4	-5	-3	-1	-4	-1	-5	0	-1	-4	-2	-4	-4	0	2	-5	-4	5	1	0	0	1	0	1.242	-1.262	-0.544	-1.337	-0.279	0.15973	0	1	3	0	-5	0	2	-2	3	-5	-3	4	-4	-5	-4	0	0
2	0.24778	0	1	0	0	-5	0	2	-1	0	-5	-3	5	-4	-5	-4	0	2	-6	-4	-4	0	0	1	0	1	0.908	1.313	2.213	-0.032	0.326	0.28172	-1	-2	-5	-5	11	-5	-5	-5	-5	-4	-2	-5	-4	-5	0	-1	-3
2	0.42853	1	-3	-1	-2	-3	-2	-2	6	-3	-4	-4	-2	-3	-4	-3	-1	-2	-3	-4	-3	0	0	1	0	1	1.57	-0.146	-0.733	-0.591	-1.302	0.45175	5	-2	-2	-3	-1	-1	-2	0	-2	-2	-2	-1	-2	-3	-1	1	-1
2	0.78072	-1	-2	2	-1	-3	-2	-2	6	-2	-3	-4	-2	-3	-4	0	0	-2	-4	-4	-3	0	0	1	0	1	-0.169	0.933	1.299	0.945	0.828	0.77028	-2	1	-2	-2	-3	5	0	-3	0	-1	-1	0	-1	-3	5	-1	-1
2	0.92364	-2	6	-1	-2	-4	1	0	-3	-1	-4	-3	3	-2	-4	-3	-1	-2	-4	-2	-3	0	0	1	0	1	-0.277	1.648	0.533	1.831	-0.561	0.92873	-2	-1	7	1	-3	-1	-1	-1	0	-4	-4	-1	-3	-4	-3	0	-1
2	0.92983	-1	-4	-3	-4	10	-4	-4	-3	-4	-2	-2	-4	-2	-3	-4	-2	-2	-3	-2	-1	0	0	1	1	0	-1.02	-0.255	-0.862	-1.343	0.465	0.93141	0	-3	-1	-2	-3	-2	-3	6	-3	-5	-4	-2	-3	-4	-3	-1	-2
[truncated: 617 more columns]
