# Supplementary material for: Prediction of S-Nitrosylation Modification Sites Based on Kernel Sparse Representation Classification and mRMR Algorithm
Source: Biomed Res Int. 2014 Aug 12;2014:438341. doi: 10.1155/2014/438341 (PMC4145740; doi:10.1155/2014/438341)
Supplement: Supplementary file 1 — supplementary material S1:lists 645 protein sequences containing S-nitrosylation sites. supplementary material S2:lists both of the protein sequence Uniprot ids and S-nitrosylation site locations in the training and testing sets, respectively. supplementary material S3:presents the training set with 666 features. supplementary material S4:presents the testing set with 666 features. supplementary material S5:lists the order of the 666 features ranked by the mRMR algorithm. [file 438341.f1.zip › S5.txt]

You have specified parameters: threshold=mu+/-1.00*sigma #fea=666 selection method=MID #maxVar=666 #maxSample=2013

Target classification variable (#1 column in the input data) has name=class 	entropy score=0.914

*** MaxRel features ***
Order 	 Fea 	 Name 	 Score
1 	 254 	 AA9_pssm_5 	 0.007
2 	 316 	 AA11_pssm_5 	 0.007
3 	 444 	 AA15_pssm_14 	 0.006
4 	 223 	 AA8_pssm_5 	 0.006
5 	 378 	 AA13_pssm_10 	 0.006
6 	 500 	 AA17_pssm_8 	 0.005
7 	 199 	 AA7_pssm_12 	 0.005
8 	 63 	 AA3_disorder 	 0.005
9 	 125 	 AA5_disorder 	 0.005
10 	 216 	 AA7_Polarity 	 0.005
11 	 291 	 AA10_pssm_11 	 0.005
12 	 94 	 AA4_disorder 	 0.005
13 	 290 	 AA10_pssm_10 	 0.005
14 	 229 	 AA8_pssm_11 	 0.005
15 	 285 	 AA10_pssm_5 	 0.005
16 	 663 	 AA18_aa_frequency 	 0.005
17 	 379 	 AA13_pssm_11 	 0.005
18 	 270 	 AA9_ss_1 	 0.005
19 	 599 	 AA20_pssm_14 	 0.005
20 	 300 	 AA10_pssm_20 	 0.004
21 	 299 	 AA10_pssm_19 	 0.004
22 	 604 	 AA20_pssm_19 	 0.004
23 	 106 	 AA4_pssm_12 	 0.004
24 	 294 	 AA10_pssm_14 	 0.004
25 	 301 	 AA10_ss_1 	 0.004
26 	 657 	 AA12_aa_frequency 	 0.004
27 	 32 	 AA2_disorder 	 0.004
28 	 332 	 AA11_ss_1 	 0.004
29 	 559 	 AA19_pssm_5 	 0.004
30 	 387 	 AA13_pssm_19 	 0.004
31 	 272 	 AA9_ss_3 	 0.004
32 	 334 	 AA11_ss_3 	 0.004
33 	 130 	 AA5_pssm_5 	 0.004
34 	 217 	 AA7_Secondary structure 	 0.004
35 	 435 	 AA15_pssm_5 	 0.004
36 	 303 	 AA10_ss_3 	 0.004
37 	 293 	 AA10_pssm_13 	 0.004
38 	 335 	 AA11_sa_1 	 0.004
39 	 336 	 AA11_sa_2 	 0.004
40 	 469 	 AA16_pssm_8 	 0.004
41 	 119 	 AA4_sa_2 	 0.004
42 	 381 	 AA13_pssm_13 	 0.004
43 	 373 	 AA13_pssm_5 	 0.004
44 	 40 	 AA2_pssm_8 	 0.004
45 	 263 	 AA9_pssm_14 	 0.004
46 	 123 	 AA4_Polarity 	 0.004
47 	 243 	 AA8_sa_2 	 0.004
48 	 31 	 AA1_Secondary structure 	 0.004
49 	 314 	 AA11_pssm_3 	 0.003
50 	 1 	 AA1_disorder 	 0.003
51 	 571 	 AA19_pssm_17 	 0.003
52 	 121 	 AA4_Electrostatic charge 	 0.003
53 	 350 	 AA12_pssm_13 	 0.003
54 	 48 	 AA2_pssm_16 	 0.003
55 	 537 	 AA18_pssm_14 	 0.003
56 	 595 	 AA20_pssm_10 	 0.003
57 	 342 	 AA12_pssm_5 	 0.003
58 	 156 	 AA6_disorder 	 0.003
59 	 118 	 AA4_sa_1 	 0.003
60 	 242 	 AA8_sa_1 	 0.003
61 	 213 	 AA7_Codon diversity 	 0.003
62 	 12 	 AA1_pssm_11 	 0.003
63 	 354 	 AA12_pssm_17 	 0.003
64 	 370 	 AA13_pssm_2 	 0.003
65 	 437 	 AA15_pssm_7 	 0.003
66 	 47 	 AA2_pssm_15 	 0.003
67 	 358 	 AA12_ss_1 	 0.003
68 	 75 	 AA3_pssm_12 	 0.003
69 	 394 	 AA13_Codon diversity 	 0.003
70 	 205 	 AA7_pssm_18 	 0.003
71 	 648 	 AA2_aa_frequency 	 0.003
72 	 443 	 AA15_pssm_13 	 0.003
73 	 244 	 AA8_Codon diversity 	 0.003
74 	 621 	 AA21_pssm_5 	 0.003
75 	 59 	 AA2_Electrostatic charge 	 0.003
76 	 268 	 AA9_pssm_19 	 0.003
77 	 99 	 AA4_pssm_5 	 0.003
78 	 142 	 AA5_pssm_17 	 0.003
79 	 450 	 AA15_pssm_20 	 0.003
80 	 598 	 AA20_pssm_13 	 0.003
81 	 344 	 AA12_pssm_7 	 0.003
82 	 523 	 AA18_disorder 	 0.003
83 	 658 	 AA13_aa_frequency 	 0.003
84 	 164 	 AA6_pssm_8 	 0.003
85 	 139 	 AA5_pssm_14 	 0.003
86 	 262 	 AA9_pssm_13 	 0.003
87 	 188 	 AA7_pssm_1 	 0.003
88 	 616 	 AA21_disorder 	 0.003
89 	 570 	 AA19_pssm_16 	 0.003
90 	 15 	 AA1_pssm_14 	 0.003
91 	 383 	 AA13_pssm_15 	 0.003
92 	 317 	 AA11_pssm_6 	 0.003
93 	 409 	 AA14_pssm_10 	 0.003
94 	 104 	 AA4_pssm_10 	 0.003
95 	 363 	 AA12_Codon diversity 	 0.003
96 	 562 	 AA19_pssm_8 	 0.003
97 	 90 	 AA3_Electrostatic charge 	 0.002
98 	 308 	 AA10_Molecular volume 	 0.002
99 	 96 	 AA4_pssm_2 	 0.002
100 	 187 	 AA7_disorder 	 0.002
101 	 609 	 AA20_sa_1 	 0.002
102 	 318 	 AA11_pssm_7 	 0.002
103 	 661 	 AA16_aa_frequency 	 0.002
104 	 644 	 AA21_Molecular volume 	 0.002
105 	 376 	 AA13_pssm_8 	 0.002
106 	 449 	 AA15_pssm_19 	 0.002
107 	 440 	 AA15_pssm_10 	 0.002
108 	 360 	 AA12_ss_3 	 0.002
109 	 398 	 AA13_Secondary structure 	 0.002
110 	 643 	 AA21_Electrostatic charge 	 0.002
111 	 551 	 AA18_Molecular volume 	 0.002
112 	 49 	 AA2_pssm_17 	 0.002
113 	 275 	 AA9_Codon diversity 	 0.002
114 	 471 	 AA16_pssm_10 	 0.002
115 	 306 	 AA10_Codon diversity 	 0.002
116 	 656 	 AA10_aa_frequency 	 0.002
117 	 307 	 AA10_Electrostatic charge 	 0.002
118 	 652 	 AA6_aa_frequency 	 0.002
119 	 361 	 AA12_sa_1 	 0.002
120 	 362 	 AA12_sa_2 	 0.002
121 	 612 	 AA20_Electrostatic charge 	 0.002
122 	 212 	 AA7_sa_2 	 0.002
123 	 460 	 AA15_Secondary structure 	 0.002
124 	 238 	 AA8_pssm_20 	 0.002
125 	 114 	 AA4_pssm_20 	 0.002
126 	 388 	 AA13_pssm_20 	 0.002
127 	 464 	 AA16_pssm_3 	 0.002
128 	 542 	 AA18_pssm_19 	 0.002
129 	 596 	 AA20_pssm_11 	 0.002
130 	 338 	 AA12_pssm_1 	 0.002
131 	 416 	 AA14_pssm_17 	 0.002
132 	 554 	 AA19_disorder 	 0.002
133 	 561 	 AA19_pssm_7 	 0.002
134 	 459 	 AA15_Polarity 	 0.002
135 	 83 	 AA3_pssm_20 	 0.002
136 	 309 	 AA10_Polarity 	 0.002
137 	 410 	 AA14_pssm_11 	 0.002
138 	 176 	 AA6_pssm_20 	 0.002
139 	 103 	 AA4_pssm_9 	 0.002
140 	 112 	 AA4_pssm_18 	 0.002
141 	 197 	 AA7_pssm_10 	 0.002
142 	 489 	 AA16_Molecular volume 	 0.002
143 	 357 	 AA12_pssm_20 	 0.002
144 	 234 	 AA8_pssm_16 	 0.002
145 	 76 	 AA3_pssm_13 	 0.002
146 	 152 	 AA5_Electrostatic charge 	 0.002
147 	 108 	 AA4_pssm_14 	 0.002
148 	 105 	 AA4_pssm_11 	 0.002
149 	 228 	 AA8_pssm_10 	 0.002
150 	 153 	 AA5_Molecular volume 	 0.002
151 	 292 	 AA10_pssm_12 	 0.002
152 	 502 	 AA17_pssm_10 	 0.002
153 	 245 	 AA8_Electrostatic charge 	 0.002
154 	 496 	 AA17_pssm_4 	 0.002
155 	 382 	 AA13_pssm_14 	 0.002
156 	 260 	 AA9_pssm_11 	 0.002
157 	 310 	 AA10_Secondary structure 	 0.002
158 	 614 	 AA20_Polarity 	 0.002
159 	 659 	 AA14_aa_frequency 	 0.002
160 	 239 	 AA8_ss_1 	 0.002
161 	 585 	 AA20_disorder 	 0.002
162 	 660 	 AA15_aa_frequency 	 0.002
163 	 608 	 AA20_ss_3 	 0.002
164 	 25 	 AA1_sa_1 	 0.002
165 	 634 	 AA21_pssm_18 	 0.002
166 	 442 	 AA15_pssm_12 	 0.002
167 	 424 	 AA14_sa_2 	 0.002
168 	 504 	 AA17_pssm_12 	 0.002
169 	 347 	 AA12_pssm_10 	 0.002
170 	 21 	 AA1_pssm_20 	 0.002
171 	 211 	 AA7_sa_1 	 0.002
172 	 61 	 AA2_Polarity 	 0.002
173 	 423 	 AA14_sa_1 	 0.002
174 	 226 	 AA8_pssm_8 	 0.002
175 	 62 	 AA2_Secondary structure 	 0.002
176 	 377 	 AA13_pssm_9 	 0.002
177 	 26 	 AA1_sa_2 	 0.002
178 	 198 	 AA7_pssm_11 	 0.002
179 	 33 	 AA2_pssm_1 	 0.002
180 	 498 	 AA17_pssm_6 	 0.002
181 	 573 	 AA19_pssm_19 	 0.002
182 	 389 	 AA13_ss_1 	 0.002
183 	 646 	 AA21_Secondary structure 	 0.002
184 	 274 	 AA9_sa_2 	 0.002
185 	 313 	 AA11_pssm_2 	 0.002
186 	 501 	 AA17_pssm_9 	 0.002
187 	 68 	 AA3_pssm_5 	 0.002
188 	 651 	 AA5_aa_frequency 	 0.002
189 	 36 	 AA2_pssm_4 	 0.002
190 	 487 	 AA16_Codon diversity 	 0.002
191 	 454 	 AA15_sa_1 	 0.002
192 	 558 	 AA19_pssm_4 	 0.002
193 	 655 	 AA9_aa_frequency 	 0.002
194 	 647 	 AA1_aa_frequency 	 0.001
195 	 207 	 AA7_pssm_20 	 0.001
196 	 319 	 AA11_pssm_8 	 0.001
197 	 166 	 AA6_pssm_10 	 0.001
198 	 279 	 AA9_Secondary structure 	 0.001
199 	 273 	 AA9_sa_1 	 0.001
200 	 366 	 AA12_Polarity 	 0.001
201 	 557 	 AA19_pssm_3 	 0.001
202 	 323 	 AA11_pssm_12 	 0.001
203 	 511 	 AA17_pssm_19 	 0.001
204 	 184 	 AA6_Molecular volume 	 0.001
205 	 147 	 AA5_ss_2 	 0.001
206 	 6 	 AA1_pssm_5 	 0.001
207 	 455 	 AA15_sa_2 	 0.001
208 	 315 	 AA11_pssm_4 	 0.001
209 	 495 	 AA17_pssm_3 	 0.001
210 	 439 	 AA15_pssm_9 	 0.001
211 	 97 	 AA4_pssm_3 	 0.001
212 	 264 	 AA9_pssm_15 	 0.001
213 	 91 	 AA3_Molecular volume 	 0.001
214 	 304 	 AA10_sa_1 	 0.001
215 	 305 	 AA10_sa_2 	 0.001
216 	 261 	 AA9_pssm_12 	 0.001
217 	 615 	 AA20_Secondary structure 	 0.001
218 	 178 	 AA6_ss_2 	 0.001
219 	 404 	 AA14_pssm_5 	 0.001
220 	 231 	 AA8_pssm_13 	 0.001
221 	 503 	 AA17_pssm_11 	 0.001
222 	 322 	 AA11_pssm_11 	 0.001
223 	 141 	 AA5_pssm_16 	 0.001
224 	 133 	 AA5_pssm_8 	 0.001
225 	 124 	 AA4_Secondary structure 	 0.001
226 	 632 	 AA21_pssm_16 	 0.001
227 	 401 	 AA14_pssm_2 	 0.001
228 	 650 	 AA4_aa_frequency 	 0.001
229 	 192 	 AA7_pssm_5 	 0.001
230 	 567 	 AA19_pssm_13 	 0.001
231 	 552 	 AA18_Polarity 	 0.001
232 	 512 	 AA17_pssm_20 	 0.001
233 	 492 	 AA17_disorder 	 0.001
234 	 588 	 AA20_pssm_3 	 0.001
235 	 241 	 AA8_ss_3 	 0.001
236 	 600 	 AA20_pssm_15 	 0.001
237 	 143 	 AA5_pssm_18 	 0.001
238 	 597 	 AA20_pssm_12 	 0.001
239 	 610 	 AA20_sa_2 	 0.001
240 	 54 	 AA2_ss_2 	 0.001
241 	 353 	 AA12_pssm_16 	 0.001
242 	 340 	 AA12_pssm_3 	 0.001
243 	 71 	 AA3_pssm_8 	 0.001
244 	 475 	 AA16_pssm_14 	 0.001
245 	 374 	 AA13_pssm_6 	 0.001
246 	 601 	 AA20_pssm_16 	 0.001
247 	 654 	 AA8_aa_frequency 	 0.001
248 	 625 	 AA21_pssm_9 	 0.001
249 	 236 	 AA8_pssm_18 	 0.001
250 	 653 	 AA7_aa_frequency 	 0.001
251 	 412 	 AA14_pssm_13 	 0.001
252 	 590 	 AA20_pssm_5 	 0.001
253 	 413 	 AA14_pssm_14 	 0.001
254 	 473 	 AA16_pssm_12 	 0.001
255 	 345 	 AA12_pssm_8 	 0.001
256 	 574 	 AA19_pssm_20 	 0.001
257 	 441 	 AA15_pssm_11 	 0.001
258 	 611 	 AA20_Codon diversity 	 0.001
259 	 194 	 AA7_pssm_7 	 0.001
260 	 159 	 AA6_pssm_3 	 0.001
261 	 539 	 AA18_pssm_16 	 0.001
262 	 235 	 AA8_pssm_17 	 0.001
263 	 248 	 AA8_Secondary structure 	 0.001
264 	 66 	 AA3_pssm_3 	 0.001
265 	 246 	 AA8_Molecular volume 	 0.001
266 	 566 	 AA19_pssm_12 	 0.001
267 	 341 	 AA12_pssm_4 	 0.001
268 	 201 	 AA7_pssm_14 	 0.001
269 	 206 	 AA7_pssm_19 	 0.001
270 	 348 	 AA12_pssm_11 	 0.001
271 	 162 	 AA6_pssm_6 	 0.001
272 	 584 	 AA19_Secondary structure 	 0.001
273 	 167 	 AA6_pssm_11 	 0.001
274 	 591 	 AA20_pssm_6 	 0.001
275 	 488 	 AA16_Electrostatic charge 	 0.001
276 	 116 	 AA4_ss_2 	 0.001
277 	 135 	 AA5_pssm_10 	 0.001
278 	 630 	 AA21_pssm_14 	 0.001
279 	 605 	 AA20_pssm_20 	 0.001
280 	 190 	 AA7_pssm_3 	 0.001
281 	 45 	 AA2_pssm_13 	 0.001
282 	 77 	 AA3_pssm_14 	 0.001
283 	 480 	 AA16_pssm_19 	 0.001
284 	 170 	 AA6_pssm_14 	 0.001
285 	 355 	 AA12_pssm_18 	 0.001
286 	 256 	 AA9_pssm_7 	 0.001
287 	 339 	 AA12_pssm_2 	 0.001
288 	 110 	 AA4_pssm_16 	 0.001
289 	 73 	 AA3_pssm_10 	 0.001
290 	 470 	 AA16_pssm_9 	 0.001
291 	 140 	 AA5_pssm_15 	 0.001
292 	 507 	 AA17_pssm_15 	 0.001
293 	 34 	 AA2_pssm_2 	 0.001
294 	 259 	 AA9_pssm_10 	 0.001
295 	 255 	 AA9_pssm_6 	 0.001
296 	 425 	 AA14_Codon diversity 	 0.001
297 	 65 	 AA3_pssm_2 	 0.001
298 	 417 	 AA14_pssm_18 	 0.001
299 	 214 	 AA7_Electrostatic charge 	 0.001
300 	 565 	 AA19_pssm_11 	 0.001
301 	 43 	 AA2_pssm_11 	 0.001
302 	 129 	 AA5_pssm_4 	 0.001
303 	 126 	 AA5_pssm_1 	 0.001
304 	 560 	 AA19_pssm_6 	 0.001
305 	 177 	 AA6_ss_1 	 0.001
306 	 461 	 AA16_disorder 	 0.001
307 	 287 	 AA10_pssm_7 	 0.001
308 	 233 	 AA8_pssm_15 	 0.001
309 	 113 	 AA4_pssm_19 	 0.001
310 	 602 	 AA20_pssm_17 	 0.001
311 	 577 	 AA19_ss_3 	 0.001
312 	 592 	 AA20_pssm_7 	 0.001
313 	 193 	 AA7_pssm_6 	 0.001
314 	 169 	 AA6_pssm_13 	 0.001
315 	 365 	 AA12_Molecular volume 	 0.001
316 	 67 	 AA3_pssm_4 	 0.001
317 	 27 	 AA1_Codon diversity 	 0.001
318 	 391 	 AA13_ss_3 	 0.001
319 	 346 	 AA12_pssm_9 	 0.001
320 	 428 	 AA14_Polarity 	 0.001
321 	 183 	 AA6_Electrostatic charge 	 0.001
322 	 476 	 AA16_pssm_15 	 0.001
323 	 111 	 AA4_pssm_17 	 0.001
324 	 627 	 AA21_pssm_11 	 0.001
325 	 328 	 AA11_pssm_17 	 0.001
326 	 331 	 AA11_pssm_20 	 0.001
327 	 406 	 AA14_pssm_7 	 0.001
328 	 583 	 AA19_Polarity 	 0.001
329 	 85 	 AA3_ss_2 	 0.001
330 	 23 	 AA1_ss_2 	 0.001
331 	 564 	 AA19_pssm_10 	 0.001
332 	 535 	 AA18_pssm_12 	 0.001
333 	 208 	 AA7_ss_1 	 0.001
334 	 581 	 AA19_Electrostatic charge 	 0.001
335 	 320 	 AA11_pssm_9 	 0.001
336 	 392 	 AA13_sa_1 	 0.001
337 	 266 	 AA9_pssm_17 	 0.001
338 	 472 	 AA16_pssm_11 	 0.001
339 	 221 	 AA8_pssm_3 	 0.001
340 	 516 	 AA17_sa_1 	 0.001
341 	 209 	 AA7_ss_2 	 0.001
342 	 92 	 AA3_Polarity 	 0.001
343 	 481 	 AA16_pssm_20 	 0.001
344 	 433 	 AA15_pssm_3 	 0.001
345 	 626 	 AA21_pssm_10 	 0.001
346 	 127 	 AA5_pssm_2 	 0.001
347 	 514 	 AA17_ss_2 	 0.001
348 	 518 	 AA17_Codon diversity 	 0.001
349 	 251 	 AA9_pssm_2 	 0.001
350 	 174 	 AA6_pssm_18 	 0.001
351 	 572 	 AA19_pssm_18 	 0.001
352 	 393 	 AA13_sa_2 	 0.001
353 	 411 	 AA14_pssm_12 	 0.001
354 	 109 	 AA4_pssm_15 	 0.001
355 	 456 	 AA15_Codon diversity 	 0.001
356 	 477 	 AA16_pssm_16 	 0.001
357 	 447 	 AA15_pssm_17 	 0.001
358 	 419 	 AA14_pssm_20 	 0.001
359 	 204 	 AA7_pssm_17 	 0.001
360 	 619 	 AA21_pssm_3 	 0.001
361 	 78 	 AA3_pssm_15 	 0.001
362 	 297 	 AA10_pssm_17 	 0.001
363 	 277 	 AA9_Molecular volume 	 0.001
364 	 269 	 AA9_pssm_20 	 0.001
365 	 237 	 AA8_pssm_19 	 0.001
366 	 98 	 AA4_pssm_4 	 0.001
367 	 563 	 AA19_pssm_9 	 0.001
368 	 10 	 AA1_pssm_9 	 0.001
369 	 426 	 AA14_Electrostatic charge 	 0.001
370 	 155 	 AA5_Secondary structure 	 0.001
371 	 35 	 AA2_pssm_3 	 0.001
372 	 321 	 AA11_pssm_10 	 0.001
373 	 606 	 AA20_ss_1 	 0.001
374 	 420 	 AA14_ss_1 	 0.001
375 	 100 	 AA4_pssm_6 	 0.001
376 	 533 	 AA18_pssm_10 	 0.001
377 	 202 	 AA7_pssm_15 	 0.001
378 	 101 	 AA4_pssm_7 	 0.001
379 	 325 	 AA11_pssm_14 	 0.001
380 	 491 	 AA16_Secondary structure 	 0.001
381 	 189 	 AA7_pssm_2 	 0.001
382 	 14 	 AA1_pssm_13 	 0.001
383 	 541 	 AA18_pssm_18 	 0.001
384 	 38 	 AA2_pssm_6 	 0.001
385 	 230 	 AA8_pssm_12 	 0.001
386 	 553 	 AA18_Secondary structure 	 0.001
387 	 645 	 AA21_Polarity 	 0.001
388 	 434 	 AA15_pssm_4 	 0.001
389 	 352 	 AA12_pssm_15 	 0.001
390 	 582 	 AA19_Molecular volume 	 0.001
391 	 16 	 AA1_pssm_15 	 0.001
392 	 545 	 AA18_ss_2 	 0.001
393 	 356 	 AA12_pssm_19 	 0.001
394 	 465 	 AA16_pssm_4 	 0.001
395 	 343 	 AA12_pssm_6 	 0.001
396 	 665 	 AA20_aa_frequency 	 0.001
397 	 466 	 AA16_pssm_5 	 0.001
398 	 42 	 AA2_pssm_10 	 0.001
399 	 546 	 AA18_ss_3 	 0.001
400 	 589 	 AA20_pssm_4 	 0.001
401 	 351 	 AA12_pssm_14 	 0.001
402 	 37 	 AA2_pssm_5 	 0.001
403 	 422 	 AA14_ss_3 	 0.001
404 	 326 	 AA11_pssm_15 	 0.001
405 	 86 	 AA3_ss_3 	 0.001
406 	 182 	 AA6_Codon diversity 	 0.001
407 	 18 	 AA1_pssm_17 	 0.001
408 	 52 	 AA2_pssm_20 	 0.001
409 	 288 	 AA10_pssm_8 	 0.001
410 	 629 	 AA21_pssm_13 	 0.001
411 	 298 	 AA10_pssm_18 	 0.001
412 	 555 	 AA19_pssm_1 	 0.001
413 	 324 	 AA11_pssm_13 	 0.001
414 	 250 	 AA9_pssm_1 	 0.001
415 	 526 	 AA18_pssm_3 	 0.001
416 	 136 	 AA5_pssm_11 	 0.001
417 	 28 	 AA1_Electrostatic charge 	 0.001
418 	 622 	 AA21_pssm_6 	 0.000
419 	 642 	 AA21_Codon diversity 	 0.000
420 	 44 	 AA2_pssm_12 	 0.000
421 	 395 	 AA13_Electrostatic charge 	 0.000
422 	 603 	 AA20_pssm_18 	 0.000
423 	 168 	 AA6_pssm_12 	 0.000
424 	 137 	 AA5_pssm_12 	 0.000
425 	 576 	 AA19_ss_2 	 0.000
426 	 200 	 AA7_pssm_13 	 0.000
427 	 568 	 AA19_pssm_14 	 0.000
428 	 550 	 AA18_Electrostatic charge 	 0.000
429 	 369 	 AA13_pssm_1 	 0.000
430 	 624 	 AA21_pssm_8 	 0.000
431 	 517 	 AA17_sa_2 	 0.000
432 	 640 	 AA21_sa_1 	 0.000
433 	 508 	 AA17_pssm_16 	 0.000
434 	 3 	 AA1_pssm_2 	 0.000
435 	 284 	 AA10_pssm_4 	 0.000
436 	 549 	 AA18_Codon diversity 	 0.000
437 	 543 	 AA18_pssm_20 	 0.000
438 	 415 	 AA14_pssm_16 	 0.000
439 	 146 	 AA5_ss_1 	 0.000
440 	 122 	 AA4_Molecular volume 	 0.000
441 	 227 	 AA8_pssm_9 	 0.000
442 	 467 	 AA16_pssm_6 	 0.000
443 	 371 	 AA13_pssm_3 	 0.000
444 	 257 	 AA9_pssm_8 	 0.000
445 	 41 	 AA2_pssm_9 	 0.000
446 	 436 	 AA15_pssm_6 	 0.000
447 	 530 	 AA18_pssm_7 	 0.000
448 	 505 	 AA17_pssm_13 	 0.000
449 	 448 	 AA15_pssm_18 	 0.000
450 	 5 	 AA1_pssm_4 	 0.000
451 	 633 	 AA21_pssm_17 	 0.000
452 	 165 	 AA6_pssm_9 	 0.000
453 	 120 	 AA4_Codon diversity 	 0.000
454 	 446 	 AA15_pssm_16 	 0.000
455 	 131 	 AA5_pssm_6 	 0.000
456 	 55 	 AA2_ss_3 	 0.000
457 	 160 	 AA6_pssm_4 	 0.000
458 	 499 	 AA17_pssm_7 	 0.000
459 	 11 	 AA1_pssm_10 	 0.000
460 	 509 	 AA17_pssm_17 	 0.000
461 	 60 	 AA2_Molecular volume 	 0.000
462 	 418 	 AA14_pssm_19 	 0.000
463 	 276 	 AA9_Electrostatic charge 	 0.000
464 	 89 	 AA3_Codon diversity 	 0.000
465 	 222 	 AA8_pssm_4 	 0.000
466 	 536 	 AA18_pssm_13 	 0.000
467 	 462 	 AA16_pssm_1 	 0.000
468 	 638 	 AA21_ss_2 	 0.000
469 	 81 	 AA3_pssm_18 	 0.000
470 	 51 	 AA2_pssm_19 	 0.000
471 	 531 	 AA18_pssm_8 	 0.000
472 	 613 	 AA20_Molecular volume 	 0.000
473 	 185 	 AA6_Polarity 	 0.000
474 	 618 	 AA21_pssm_2 	 0.000
475 	 50 	 AA2_pssm_18 	 0.000
476 	 175 	 AA6_pssm_19 	 0.000
477 	 46 	 AA2_pssm_14 	 0.000
478 	 107 	 AA4_pssm_13 	 0.000
479 	 203 	 AA7_pssm_16 	 0.000
480 	 427 	 AA14_Molecular volume 	 0.000
481 	 219 	 AA8_pssm_1 	 0.000
482 	 525 	 AA18_pssm_2 	 0.000
483 	 429 	 AA14_Secondary structure 	 0.000
484 	 134 	 AA5_pssm_9 	 0.000
485 	 265 	 AA9_pssm_16 	 0.000
486 	 191 	 AA7_pssm_4 	 0.000
487 	 9 	 AA1_pssm_8 	 0.000
488 	 282 	 AA10_pssm_2 	 0.000
489 	 510 	 AA17_pssm_18 	 0.000
490 	 430 	 AA15_disorder 	 0.000
491 	 528 	 AA18_pssm_5 	 0.000
492 	 385 	 AA13_pssm_17 	 0.000
493 	 478 	 AA16_pssm_17 	 0.000
494 	 145 	 AA5_pssm_20 	 0.000
495 	 224 	 AA8_pssm_6 	 0.000
496 	 79 	 AA3_pssm_16 	 0.000
497 	 195 	 AA7_pssm_8 	 0.000
498 	 556 	 AA19_pssm_2 	 0.000
499 	 64 	 AA3_pssm_1 	 0.000
500 	 405 	 AA14_pssm_6 	 0.000
501 	 80 	 AA3_pssm_17 	 0.000
502 	 445 	 AA15_pssm_15 	 0.000
503 	 569 	 AA19_pssm_15 	 0.000
504 	 82 	 AA3_pssm_19 	 0.000
505 	 474 	 AA16_pssm_13 	 0.000
506 	 24 	 AA1_ss_3 	 0.000
507 	 578 	 AA19_sa_1 	 0.000
508 	 150 	 AA5_sa_2 	 0.000
509 	 639 	 AA21_ss_3 	 0.000
510 	 29 	 AA1_Molecular volume 	 0.000
511 	 522 	 AA17_Secondary structure 	 0.000
512 	 637 	 AA21_ss_1 	 0.000
513 	 587 	 AA20_pssm_2 	 0.000
514 	 620 	 AA21_pssm_4 	 0.000
515 	 225 	 AA8_pssm_7 	 0.000
516 	 283 	 AA10_pssm_3 	 0.000
517 	 144 	 AA5_pssm_19 	 0.000
518 	 375 	 AA13_pssm_7 	 0.000
519 	 74 	 AA3_pssm_11 	 0.000
520 	 497 	 AA17_pssm_5 	 0.000
521 	 329 	 AA11_pssm_18 	 0.000
522 	 186 	 AA6_Secondary structure 	 0.000
523 	 617 	 AA21_pssm_1 	 0.000
524 	 296 	 AA10_pssm_16 	 0.000
525 	 364 	 AA12_Electrostatic charge 	 0.000
526 	 157 	 AA6_pssm_1 	 0.000
527 	 215 	 AA7_Molecular volume 	 0.000
528 	 631 	 AA21_pssm_15 	 0.000
529 	 432 	 AA15_pssm_2 	 0.000
530 	 402 	 AA14_pssm_3 	 0.000
531 	 396 	 AA13_Molecular volume 	 0.000
532 	 515 	 AA17_ss_3 	 0.000
533 	 547 	 AA18_sa_1 	 0.000
534 	 635 	 AA21_pssm_19 	 0.000
535 	 161 	 AA6_pssm_5 	 0.000
536 	 400 	 AA14_pssm_1 	 0.000
537 	 312 	 AA11_pssm_1 	 0.000
538 	 128 	 AA5_pssm_3 	 0.000
539 	 349 	 AA12_pssm_12 	 0.000
540 	 39 	 AA2_pssm_7 	 0.000
541 	 149 	 AA5_sa_1 	 0.000
542 	 172 	 AA6_pssm_16 	 0.000
543 	 458 	 AA15_Molecular volume 	 0.000
544 	 19 	 AA1_pssm_18 	 0.000
545 	 4 	 AA1_pssm_3 	 0.000
546 	 173 	 AA6_pssm_17 	 0.000
547 	 13 	 AA1_pssm_12 	 0.000
548 	 534 	 AA18_pssm_11 	 0.000
549 	 69 	 AA3_pssm_6 	 0.000
550 	 2 	 AA1_pssm_1 	 0.000
551 	 58 	 AA2_Codon diversity 	 0.000
552 	 380 	 AA13_pssm_12 	 0.000
553 	 519 	 AA17_Electrostatic charge 	 0.000
554 	 485 	 AA16_sa_1 	 0.000
555 	 490 	 AA16_Polarity 	 0.000
556 	 281 	 AA10_pssm_1 	 0.000
557 	 330 	 AA11_pssm_19 	 0.000
558 	 628 	 AA21_pssm_12 	 0.000
559 	 532 	 AA18_pssm_9 	 0.000
560 	 527 	 AA18_pssm_4 	 0.000
561 	 20 	 AA1_pssm_19 	 0.000
562 	 594 	 AA20_pssm_9 	 0.000
563 	 267 	 AA9_pssm_18 	 0.000
564 	 493 	 AA17_pssm_1 	 0.000
565 	 30 	 AA1_Polarity 	 0.000
566 	 232 	 AA8_pssm_14 	 0.000
567 	 93 	 AA3_Secondary structure 	 0.000
568 	 623 	 AA21_pssm_7 	 0.000
569 	 540 	 AA18_pssm_17 	 0.000
570 	 132 	 AA5_pssm_7 	 0.000
571 	 431 	 AA15_pssm_1 	 0.000
572 	 56 	 AA2_sa_1 	 0.000
573 	 117 	 AA4_ss_3 	 0.000
574 	 286 	 AA10_pssm_6 	 0.000
575 	 95 	 AA4_pssm_1 	 0.000
576 	 662 	 AA17_aa_frequency 	 0.000
577 	 479 	 AA16_pssm_18 	 0.000
578 	 438 	 AA15_pssm_8 	 0.000
579 	 151 	 AA5_Codon diversity 	 0.000
580 	 240 	 AA8_ss_2 	 0.000
581 	 451 	 AA15_ss_1 	 0.000
582 	 196 	 AA7_pssm_9 	 0.000
583 	 258 	 AA9_pssm_9 	 0.000
584 	 384 	 AA13_pssm_16 	 0.000
585 	 521 	 AA17_Polarity 	 0.000
586 	 390 	 AA13_ss_2 	 0.000
587 	 72 	 AA3_pssm_9 	 0.000
588 	 513 	 AA17_ss_1 	 0.000
589 	 253 	 AA9_pssm_4 	 0.000
590 	 484 	 AA16_ss_3 	 0.000
591 	 414 	 AA14_pssm_15 	 0.000
592 	 463 	 AA16_pssm_2 	 0.000
593 	 593 	 AA20_pssm_8 	 0.000
594 	 57 	 AA2_sa_2 	 0.000
595 	 210 	 AA7_ss_3 	 0.000
596 	 327 	 AA11_pssm_16 	 0.000
597 	 397 	 AA13_Polarity 	 0.000
598 	 138 	 AA5_pssm_13 	 0.000
599 	 486 	 AA16_sa_2 	 0.000
600 	 548 	 AA18_sa_2 	 0.000
601 	 579 	 AA19_sa_2 	 0.000
602 	 158 	 AA6_pssm_2 	 0.000
603 	 367 	 AA12_Secondary structure 	 0.000
604 	 649 	 AA3_aa_frequency 	 0.000
605 	 636 	 AA21_pssm_20 	 0.000
606 	 407 	 AA14_pssm_8 	 0.000
607 	 247 	 AA8_Polarity 	 0.000
608 	 88 	 AA3_sa_2 	 0.000
609 	 457 	 AA15_Electrostatic charge 	 0.000
610 	 453 	 AA15_ss_3 	 0.000
611 	 70 	 AA3_pssm_7 	 0.000
612 	 386 	 AA13_pssm_18 	 0.000
613 	 666 	 AA21_aa_frequency
 	 0.000
614 	 664 	 AA19_aa_frequency 	 0.000
615 	 8 	 AA1_pssm_7 	 0.000
616 	 7 	 AA1_pssm_6 	 0.000
617 	 520 	 AA17_Molecular volume 	 0.000
618 	 102 	 AA4_pssm_8 	 0.000
619 	 468 	 AA16_pssm_7 	 0.000
620 	 586 	 AA20_pssm_1 	 0.000
621 	 115 	 AA4_ss_1 	 0.000
622 	 483 	 AA16_ss_2 	 0.000
623 	 154 	 AA5_Polarity 	 0.000
624 	 403 	 AA14_pssm_4 	 0.000
625 	 641 	 AA21_sa_2 	 0.000
626 	 171 	 AA6_pssm_15 	 0.000
627 	 278 	 AA9_Polarity 	 0.000
628 	 372 	 AA13_pssm_4 	 0.000
629 	 22 	 AA1_ss_1 	 0.000
630 	 17 	 AA1_pssm_16 	 0.000
631 	 575 	 AA19_ss_1 	 0.000
632 	 529 	 AA18_pssm_6 	 0.000
633 	 506 	 AA17_pssm_14 	 0.000
634 	 84 	 AA3_ss_1 	 0.000
635 	 280 	 AA10_disorder 	 0.000
636 	 87 	 AA3_sa_1 	 0.000
637 	 359 	 AA12_ss_2 	 0.000
638 	 311 	 AA11_disorder 	 0.000
639 	 524 	 AA18_pssm_1 	 0.000
640 	 580 	 AA19_Codon diversity 	 0.000
641 	 179 	 AA6_ss_3 	 0.000
642 	 148 	 AA5_ss_3 	 0.000
643 	 218 	 AA8_disorder 	 0.000
644 	 271 	 AA9_ss_2 	 0.000
645 	 494 	 AA17_pssm_2 	 0.000
646 	 408 	 AA14_pssm_9 	 0.000
647 	 53 	 AA2_ss_1 	 0.000
648 	 249 	 AA9_disorder 	 0.000
649 	 368 	 AA13_disorder 	 0.000
650 	 252 	 AA9_pssm_3 	 0.000
651 	 607 	 AA20_ss_2 	 0.000
652 	 181 	 AA6_sa_2 	 0.000
653 	 163 	 AA6_pssm_7 	 0.000
654 	 289 	 AA10_pssm_9 	 0.000
655 	 337 	 AA12_disorder 	 0.000
656 	 295 	 AA10_pssm_15 	 0.000
657 	 421 	 AA14_ss_2 	 0.000
658 	 302 	 AA10_ss_2 	 0.000
659 	 452 	 AA15_ss_2 	 0.000
660 	 482 	 AA16_ss_1 	 0.000
661 	 333 	 AA11_ss_2 	 0.000
662 	 538 	 AA18_pssm_15 	 0.000
663 	 544 	 AA18_ss_1 	 0.000
664 	 220 	 AA8_pssm_2 	 0.000
665 	 180 	 AA6_sa_1 	 0.000

*** mRMR features *** 
Order 	 Fea 	 Name 	 Score
1 	 254 	 AA9_pssm_5 	 0.007
2 	 270 	 AA9_ss_1 	 0.004
3 	 378 	 AA13_pssm_10 	 0.004
4 	 123 	 AA4_Polarity 	 0.003
5 	 316 	 AA11_pssm_5 	 0.002
6 	 217 	 AA7_Secondary structure 	 0.002
7 	 663 	 AA18_aa_frequency 	 0.003
8 	 444 	 AA15_pssm_14 	 0.002
9 	 657 	 AA12_aa_frequency 	 0.002
10 	 571 	 AA19_pssm_17 	 0.002
11 	 31 	 AA1_Secondary structure 	 0.002
12 	 299 	 AA10_pssm_19 	 0.002
13 	 648 	 AA2_aa_frequency 	 0.001
14 	 130 	 AA5_pssm_5 	 0.002
15 	 500 	 AA17_pssm_8 	 0.001
16 	 223 	 AA8_pssm_5 	 0.001
17 	 599 	 AA20_pssm_14 	 0.001
18 	 644 	 AA21_Molecular volume 	 0.001
19 	 661 	 AA16_aa_frequency 	 0.001
20 	 205 	 AA7_pssm_18 	 0.001
21 	 90 	 AA3_Electrostatic charge 	 0.001
22 	 25 	 AA1_sa_1 	 0.000
23 	 308 	 AA10_Molecular volume 	 0.000
24 	 658 	 AA13_aa_frequency 	 0.000
25 	 559 	 AA19_pssm_5 	 0.000
26 	 152 	 AA5_Electrostatic charge 	 0.000
27 	 285 	 AA10_pssm_5 	 0.000
28 	 199 	 AA7_pssm_12 	 0.000
29 	 652 	 AA6_aa_frequency 	 0.000
30 	 424 	 AA14_sa_2 	 -0.000
31 	 350 	 AA12_pssm_13 	 -0.000
32 	 634 	 AA21_pssm_18 	 -0.000
33 	 608 	 AA20_ss_3 	 -0.000
34 	 245 	 AA8_Electrostatic charge 	 -0.000
35 	 40 	 AA2_pssm_8 	 -0.000
36 	 275 	 AA9_Codon diversity 	 -0.000
37 	 621 	 AA21_pssm_5 	 -0.000
38 	 335 	 AA11_sa_1 	 -0.000
39 	 435 	 AA15_pssm_5 	 -0.001
40 	 469 	 AA16_pssm_8 	 -0.001
41 	 112 	 AA4_pssm_18 	 -0.001
42 	 612 	 AA20_Electrostatic charge 	 -0.001
43 	 76 	 AA3_pssm_13 	 -0.001
44 	 416 	 AA14_pssm_17 	 -0.001
45 	 142 	 AA5_pssm_17 	 -0.001
46 	 581 	 AA19_Electrostatic charge 	 -0.001
47 	 342 	 AA12_pssm_5 	 -0.001
48 	 460 	 AA15_Secondary structure 	 -0.001
49 	 263 	 AA9_pssm_14 	 -0.001
50 	 545 	 AA18_ss_2 	 -0.001
51 	 54 	 AA2_ss_2 	 -0.001
52 	 373 	 AA13_pssm_5 	 -0.001
53 	 417 	 AA14_pssm_18 	 -0.001
54 	 243 	 AA8_sa_2 	 -0.001
55 	 99 	 AA4_pssm_5 	 -0.001
56 	 334 	 AA11_ss_3 	 -0.002
57 	 354 	 AA12_pssm_17 	 -0.002
58 	 143 	 AA5_pssm_18 	 -0.002
59 	 164 	 AA6_pssm_8 	 -0.002
60 	 518 	 AA17_Codon diversity 	 -0.002
61 	 78 	 AA3_pssm_15 	 -0.002
62 	 429 	 AA14_Secondary structure 	 -0.002
63 	 537 	 AA18_pssm_14 	 -0.002
64 	 383 	 AA13_pssm_15 	 -0.002
65 	 15 	 AA1_pssm_14 	 -0.002
66 	 119 	 AA4_sa_2 	 -0.002
67 	 609 	 AA20_sa_1 	 -0.002
68 	 572 	 AA19_pssm_18 	 -0.002
69 	 489 	 AA16_Molecular volume 	 -0.002
70 	 68 	 AA3_pssm_5 	 -0.002
71 	 213 	 AA7_Codon diversity 	 -0.002
72 	 229 	 AA8_pssm_11 	 -0.002
73 	 646 	 AA21_Secondary structure 	 -0.002
74 	 59 	 AA2_Electrostatic charge 	 -0.002
75 	 355 	 AA12_pssm_18 	 -0.002
76 	 264 	 AA9_pssm_15 	 -0.002
77 	 439 	 AA15_pssm_9 	 -0.002
78 	 147 	 AA5_ss_2 	 -0.002
79 	 49 	 AA2_pssm_17 	 -0.002
80 	 310 	 AA10_Secondary structure 	 -0.002
81 	 121 	 AA4_Electrostatic charge 	 -0.002
82 	 387 	 AA13_pssm_19 	 -0.002
83 	 510 	 AA17_pssm_18 	 -0.002
84 	 598 	 AA20_pssm_13 	 -0.002
85 	 6 	 AA1_pssm_5 	 -0.003
86 	 174 	 AA6_pssm_18 	 -0.003
87 	 111 	 AA4_pssm_17 	 -0.003
88 	 654 	 AA8_aa_frequency 	 -0.003
89 	 443 	 AA15_pssm_13 	 -0.003
90 	 188 	 AA7_pssm_1 	 -0.003
91 	 479 	 AA16_pssm_18 	 -0.003
92 	 647 	 AA1_aa_frequency 	 -0.003
93 	 37 	 AA2_pssm_5 	 -0.003
94 	 293 	 AA10_pssm_13 	 -0.003
95 	 476 	 AA16_pssm_15 	 -0.003
96 	 651 	 AA5_aa_frequency 	 -0.003
97 	 625 	 AA21_pssm_9 	 -0.003
98 	 551 	 AA18_Molecular volume 	 -0.003
99 	 314 	 AA11_pssm_3 	 -0.003
100 	 262 	 AA9_pssm_13 	 -0.003
101 	 216 	 AA7_Polarity 	 -0.003
102 	 570 	 AA19_pssm_16 	 -0.003
103 	 660 	 AA15_aa_frequency 	 -0.003
104 	 338 	 AA12_pssm_1 	 -0.003
105 	 638 	 AA21_ss_2 	 -0.003
106 	 507 	 AA17_pssm_15 	 -0.003
107 	 404 	 AA14_pssm_5 	 -0.003
108 	 81 	 AA3_pssm_18 	 -0.003
109 	 541 	 AA18_pssm_18 	 -0.003
110 	 466 	 AA16_pssm_5 	 -0.003
111 	 75 	 AA3_pssm_12 	 -0.003
112 	 370 	 AA13_pssm_2 	 -0.003
113 	 365 	 AA12_Molecular volume 	 -0.003
114 	 140 	 AA5_pssm_15 	 -0.003
115 	 615 	 AA20_Secondary structure 	 -0.003
116 	 528 	 AA18_pssm_5 	 -0.003
117 	 176 	 AA6_pssm_20 	 -0.003
118 	 573 	 AA19_pssm_19 	 -0.003
119 	 398 	 AA13_Secondary structure 	 -0.003
120 	 590 	 AA20_pssm_5 	 -0.003
121 	 292 	 AA10_pssm_12 	 -0.003
122 	 659 	 AA14_aa_frequency 	 -0.003
123 	 361 	 AA12_sa_1 	 -0.003
124 	 448 	 AA15_pssm_18 	 -0.003
125 	 279 	 AA9_Secondary structure 	 -0.003
126 	 497 	 AA17_pssm_5 	 -0.003
127 	 192 	 AA7_pssm_5 	 -0.003
128 	 298 	 AA10_pssm_18 	 -0.003
129 	 16 	 AA1_pssm_15 	 -0.003
130 	 184 	 AA6_Molecular volume 	 -0.003
131 	 604 	 AA20_pssm_19 	 -0.003
132 	 139 	 AA5_pssm_14 	 -0.003
133 	 329 	 AA11_pssm_18 	 -0.003
134 	 235 	 AA8_pssm_17 	 -0.003
135 	 584 	 AA19_Secondary structure 	 -0.003
136 	 45 	 AA2_pssm_13 	 -0.003
137 	 483 	 AA16_ss_2 	 -0.003
138 	 328 	 AA11_pssm_17 	 -0.003
139 	 629 	 AA21_pssm_13 	 -0.003
140 	 103 	 AA4_pssm_9 	 -0.003
141 	 19 	 AA1_pssm_18 	 -0.003
142 	 501 	 AA17_pssm_9 	 -0.003
143 	 294 	 AA10_pssm_14 	 -0.003
144 	 552 	 AA18_Polarity 	 -0.003
145 	 47 	 AA2_pssm_15 	 -0.003
146 	 381 	 AA13_pssm_13 	 -0.003
147 	 274 	 AA9_sa_2 	 -0.004
148 	 12 	 AA1_pssm_11 	 -0.004
149 	 520 	 AA17_Molecular volume 	 -0.004
150 	 437 	 AA15_pssm_7 	 -0.004
151 	 86 	 AA3_ss_3 	 -0.004
152 	 306 	 AA10_Codon diversity 	 -0.004
153 	 600 	 AA20_pssm_15 	 -0.004
154 	 649 	 AA3_aa_frequency 	 -0.004
155 	 386 	 AA13_pssm_18 	 -0.004
156 	 336 	 AA11_sa_2 	 -0.004
157 	 640 	 AA21_sa_1 	 -0.004
158 	 268 	 AA9_pssm_19 	 -0.004
159 	 23 	 AA1_ss_2 	 -0.004
160 	 464 	 AA16_pssm_3 	 -0.004
161 	 567 	 AA19_pssm_13 	 -0.004
162 	 603 	 AA20_pssm_18 	 -0.004
163 	 426 	 AA14_Electrostatic charge 	 -0.004
164 	 234 	 AA8_pssm_16 	 -0.004
165 	 366 	 AA12_Polarity 	 -0.004
166 	 124 	 AA4_Secondary structure 	 -0.004
167 	 511 	 AA17_pssm_19 	 -0.004
168 	 322 	 AA11_pssm_11 	 -0.004
169 	 62 	 AA2_Secondary structure 	 -0.004
170 	 266 	 AA9_pssm_17 	 -0.004
171 	 272 	 AA9_ss_3 	 -0.004
172 	 155 	 AA5_Secondary structure 	 -0.004
173 	 542 	 AA18_pssm_19 	 -0.004
174 	 178 	 AA6_ss_2 	 -0.004
175 	 480 	 AA16_pssm_19 	 -0.004
176 	 29 	 AA1_Molecular volume 	 -0.004
177 	 206 	 AA7_pssm_19 	 -0.004
178 	 458 	 AA15_Molecular volume 	 -0.004
179 	 108 	 AA4_pssm_14 	 -0.004
180 	 631 	 AA21_pssm_15 	 -0.004
181 	 161 	 AA6_pssm_5 	 -0.004
182 	 396 	 AA13_Molecular volume 	 -0.004
183 	 539 	 AA18_pssm_16 	 -0.004
184 	 267 	 AA9_pssm_18 	 -0.004
185 	 10 	 AA1_pssm_9 	 -0.004
186 	 412 	 AA14_pssm_13 	 -0.004
187 	 578 	 AA19_sa_1 	 -0.004
188 	 509 	 AA17_pssm_17 	 -0.004
189 	 64 	 AA3_pssm_1 	 -0.004
190 	 109 	 AA4_pssm_15 	 -0.004
191 	 300 	 AA10_pssm_20 	 -0.004
192 	 666 	 AA21_aa_frequency
 	 -0.004
193 	 48 	 AA2_pssm_16 	 -0.004
194 	 212 	 AA7_sa_2 	 -0.004
195 	 611 	 AA20_Codon diversity 	 -0.004
196 	 447 	 AA15_pssm_17 	 -0.004
197 	 173 	 AA6_pssm_17 	 -0.004
198 	 277 	 AA9_Molecular volume 	 -0.004
199 	 320 	 AA11_pssm_9 	 -0.004
200 	 358 	 AA12_ss_1 	 -0.004
201 	 51 	 AA2_pssm_19 	 -0.004
202 	 401 	 AA14_pssm_2 	 -0.004
203 	 126 	 AA5_pssm_1 	 -0.004
204 	 637 	 AA21_ss_1 	 -0.004
205 	 169 	 AA6_pssm_13 	 -0.004
206 	 248 	 AA8_Secondary structure 	 -0.004
207 	 569 	 AA19_pssm_15 	 -0.004
208 	 474 	 AA16_pssm_13 	 -0.004
209 	 553 	 AA18_Secondary structure 	 -0.004
210 	 215 	 AA7_Molecular volume 	 -0.004
211 	 454 	 AA15_sa_1 	 -0.004
212 	 297 	 AA10_pssm_17 	 -0.004
213 	 363 	 AA12_Codon diversity 	 -0.004
214 	 231 	 AA8_pssm_13 	 -0.004
215 	 563 	 AA19_pssm_9 	 -0.004
216 	 385 	 AA13_pssm_17 	 -0.004
217 	 106 	 AA4_pssm_12 	 -0.004
218 	 77 	 AA3_pssm_14 	 -0.004
219 	 514 	 AA17_ss_2 	 -0.004
220 	 478 	 AA16_pssm_17 	 -0.004
221 	 449 	 AA15_pssm_19 	 -0.004
222 	 632 	 AA21_pssm_16 	 -0.004
223 	 116 	 AA4_ss_2 	 -0.004
224 	 186 	 AA6_Secondary structure 	 -0.004
225 	 491 	 AA16_Secondary structure 	 -0.004
226 	 602 	 AA20_pssm_17 	 -0.004
227 	 93 	 AA3_Secondary structure 	 -0.004
228 	 522 	 AA17_Secondary structure 	 -0.004
229 	 18 	 AA1_pssm_17 	 -0.004
230 	 656 	 AA10_aa_frequency 	 -0.004
231 	 134 	 AA5_pssm_9 	 -0.004
232 	 233 	 AA8_pssm_15 	 -0.004
233 	 394 	 AA13_Codon diversity 	 -0.004
234 	 413 	 AA14_pssm_14 	 -0.004
235 	 204 	 AA7_pssm_17 	 -0.004
236 	 346 	 AA12_pssm_9 	 -0.004
237 	 153 	 AA5_Molecular volume 	 -0.004
238 	 57 	 AA2_sa_2 	 -0.004
239 	 630 	 AA21_pssm_14 	 -0.004
240 	 650 	 AA4_aa_frequency 	 -0.004
241 	 538 	 AA18_pssm_15 	 -0.005
242 	 595 	 AA20_pssm_10 	 -0.005
243 	 236 	 AA8_pssm_18 	 -0.005
244 	 14 	 AA1_pssm_13 	 -0.005
245 	 516 	 AA17_sa_1 	 -0.005
246 	 33 	 AA2_pssm_1 	 -0.005
247 	 66 	 AA3_pssm_3 	 -0.005
248 	 643 	 AA21_Electrostatic charge 	 -0.005
249 	 138 	 AA5_pssm_13 	 -0.005
250 	 377 	 AA13_pssm_9 	 -0.005
251 	 200 	 AA7_pssm_13 	 -0.005
252 	 470 	 AA16_pssm_9 	 -0.005
253 	 91 	 AA3_Molecular volume 	 -0.005
254 	 202 	 AA7_pssm_15 	 -0.005
255 	 359 	 AA12_ss_2 	 -0.005
256 	 532 	 AA18_pssm_9 	 -0.005
257 	 244 	 AA8_Codon diversity 	 -0.005
258 	 580 	 AA19_Codon diversity 	 -0.005
259 	 319 	 AA11_pssm_8 	 -0.005
260 	 159 	 AA6_pssm_3 	 -0.005
261 	 50 	 AA2_pssm_18 	 -0.005
262 	 445 	 AA15_pssm_15 	 -0.005
263 	 250 	 AA9_pssm_1 	 -0.005
264 	 540 	 AA18_pssm_17 	 -0.005
265 	 324 	 AA11_pssm_13 	 -0.005
266 	 309 	 AA10_Polarity 	 -0.005
267 	 459 	 AA15_Polarity 	 -0.005
268 	 353 	 AA12_pssm_16 	 -0.005
269 	 505 	 AA17_pssm_13 	 -0.005
270 	 414 	 AA14_pssm_15 	 -0.005
271 	 107 	 AA4_pssm_13 	 -0.005
272 	 576 	 AA19_ss_2 	 -0.005
273 	 594 	 AA20_pssm_9 	 -0.005
274 	 24 	 AA1_ss_3 	 -0.005
275 	 150 	 AA5_sa_2 	 -0.005
276 	 303 	 AA10_ss_3 	 -0.005
277 	 27 	 AA1_Codon diversity 	 -0.005
278 	 557 	 AA19_pssm_3 	 -0.005
279 	 495 	 AA17_pssm_3 	 -0.005
280 	 428 	 AA14_Polarity 	 -0.005
281 	 351 	 AA12_pssm_14 	 -0.005
282 	 369 	 AA13_pssm_1 	 -0.005
283 	 83 	 AA3_pssm_20 	 -0.005
284 	 453 	 AA15_ss_3 	 -0.005
285 	 171 	 AA6_pssm_15 	 -0.005
286 	 96 	 AA4_pssm_2 	 -0.005
287 	 431 	 AA15_pssm_1 	 -0.005
288 	 633 	 AA21_pssm_17 	 -0.005
289 	 219 	 AA8_pssm_1 	 -0.005
290 	 113 	 AA4_pssm_19 	 -0.005
291 	 462 	 AA16_pssm_1 	 -0.005
292 	 313 	 AA11_pssm_2 	 -0.005
293 	 586 	 AA20_pssm_1 	 -0.005
294 	 246 	 AA8_Molecular volume 	 -0.005
295 	 304 	 AA10_sa_1 	 -0.005
296 	 400 	 AA14_pssm_1 	 -0.005
297 	 60 	 AA2_Molecular volume 	 -0.005
298 	 475 	 AA16_pssm_14 	 -0.005
299 	 2 	 AA1_pssm_1 	 -0.005
300 	 209 	 AA7_ss_2 	 -0.005
301 	 95 	 AA4_pssm_1 	 -0.005
302 	 201 	 AA7_pssm_14 	 -0.005
303 	 379 	 AA13_pssm_11 	 -0.005
304 	 88 	 AA3_sa_2 	 -0.005
305 	 536 	 AA18_pssm_13 	 -0.005
306 	 127 	 AA5_pssm_2 	 -0.005
307 	 613 	 AA20_Molecular volume 	 -0.005
308 	 46 	 AA2_pssm_14 	 -0.005
309 	 421 	 AA14_ss_2 	 -0.005
310 	 487 	 AA16_Codon diversity 	 -0.005
311 	 555 	 AA19_pssm_1 	 -0.005
312 	 655 	 AA9_aa_frequency 	 -0.005
313 	 85 	 AA3_ss_2 	 -0.005
314 	 582 	 AA19_Molecular volume 	 -0.005
315 	 183 	 AA6_Electrostatic charge 	 -0.005
316 	 635 	 AA21_pssm_19 	 -0.005
317 	 118 	 AA4_sa_1 	 -0.005
318 	 290 	 AA10_pssm_10 	 -0.005
319 	 653 	 AA7_aa_frequency 	 -0.005
320 	 617 	 AA21_pssm_1 	 -0.005
321 	 665 	 AA20_aa_frequency 	 -0.005
322 	 352 	 AA12_pssm_15 	 -0.005
323 	 524 	 AA18_pssm_1 	 -0.005
324 	 237 	 AA8_pssm_19 	 -0.005
325 	 242 	 AA8_sa_1 	 -0.005
326 	 442 	 AA15_pssm_12 	 -0.005
327 	 407 	 AA14_pssm_8 	 -0.005
328 	 151 	 AA5_Codon diversity 	 -0.005
329 	 157 	 AA6_pssm_1 	 -0.005
330 	 493 	 AA17_pssm_1 	 -0.005
331 	 251 	 AA9_pssm_2 	 -0.005
332 	 588 	 AA20_pssm_3 	 -0.005
333 	 80 	 AA3_pssm_17 	 -0.005
334 	 58 	 AA2_Codon diversity 	 -0.005
335 	 326 	 AA11_pssm_15 	 -0.005
336 	 376 	 AA13_pssm_8 	 -0.006
337 	 331 	 AA11_pssm_20 	 -0.006
338 	 546 	 AA18_ss_3 	 -0.006
339 	 82 	 AA3_pssm_19 	 -0.006
340 	 367 	 AA12_Secondary structure 	 -0.006
341 	 170 	 AA6_pssm_14 	 -0.006
342 	 26 	 AA1_sa_2 	 -0.006
343 	 450 	 AA15_pssm_20 	 -0.006
344 	 281 	 AA10_pssm_1 	 -0.006
345 	 427 	 AA14_Molecular volume 	 -0.006
346 	 568 	 AA19_pssm_14 	 -0.006
347 	 549 	 AA18_Codon diversity 	 -0.006
348 	 141 	 AA5_pssm_16 	 -0.006
349 	 165 	 AA6_pssm_9 	 -0.006
350 	 488 	 AA16_Electrostatic charge 	 -0.006
351 	 512 	 AA17_pssm_20 	 -0.006
352 	 639 	 AA21_ss_3 	 -0.006
353 	 357 	 AA12_pssm_20 	 -0.006
354 	 110 	 AA4_pssm_16 	 -0.006
355 	 307 	 AA10_Electrostatic charge 	 -0.006
356 	 190 	 AA7_pssm_3 	 -0.006
357 	 636 	 AA21_pssm_20 	 -0.006
358 	 20 	 AA1_pssm_19 	 -0.006
359 	 34 	 AA2_pssm_2 	 -0.006
360 	 148 	 AA5_ss_3 	 -0.006
361 	 562 	 AA19_pssm_8 	 -0.006
362 	 260 	 AA9_pssm_11 	 -0.006
363 	 587 	 AA20_pssm_2 	 -0.006
364 	 89 	 AA3_Codon diversity 	 -0.006
365 	 312 	 AA11_pssm_1 	 -0.006
366 	 498 	 AA17_pssm_6 	 -0.006
367 	 214 	 AA7_Electrostatic charge 	 -0.006
368 	 393 	 AA13_sa_2 	 -0.006
369 	 226 	 AA8_pssm_8 	 -0.006
370 	 607 	 AA20_ss_2 	 -0.006
371 	 295 	 AA10_pssm_15 	 -0.006
372 	 28 	 AA1_Electrostatic charge 	 -0.006
373 	 548 	 AA18_sa_2 	 -0.006
374 	 418 	 AA14_pssm_19 	 -0.006
375 	 382 	 AA13_pssm_14 	 -0.006
376 	 344 	 AA12_pssm_7 	 -0.006
377 	 182 	 AA6_Codon diversity 	 -0.006
378 	 356 	 AA12_pssm_19 	 -0.006
379 	 415 	 AA14_pssm_16 	 -0.006
380 	 120 	 AA4_Codon diversity 	 -0.006
381 	 265 	 AA9_pssm_16 	 -0.006
382 	 506 	 AA17_pssm_14 	 -0.006
383 	 72 	 AA3_pssm_9 	 -0.006
384 	 360 	 AA12_ss_3 	 -0.006
385 	 22 	 AA1_ss_1 	 -0.006
386 	 550 	 AA18_Electrostatic charge 	 -0.006
387 	 318 	 AA11_pssm_7 	 -0.006
388 	 452 	 AA15_ss_2 	 -0.006
389 	 463 	 AA16_pssm_2 	 -0.006
390 	 21 	 AA1_pssm_20 	 -0.006
391 	 519 	 AA17_Electrostatic charge 	 -0.006
392 	 128 	 AA5_pssm_3 	 -0.006
393 	 642 	 AA21_Codon diversity 	 -0.006
394 	 240 	 AA8_ss_2 	 -0.006
395 	 41 	 AA2_pssm_9 	 -0.006
396 	 144 	 AA5_pssm_19 	 -0.006
397 	 433 	 AA15_pssm_3 	 -0.006
398 	 181 	 AA6_sa_2 	 -0.006
399 	 395 	 AA13_Electrostatic charge 	 -0.006
400 	 227 	 AA8_pssm_9 	 -0.006
401 	 291 	 AA10_pssm_11 	 -0.006
402 	 619 	 AA21_pssm_3 	 -0.006
403 	 122 	 AA4_Molecular volume 	 -0.006
404 	 276 	 AA9_Electrostatic charge 	 -0.006
405 	 543 	 AA18_pssm_20 	 -0.006
406 	 664 	 AA19_aa_frequency 	 -0.006
407 	 471 	 AA16_pssm_10 	 -0.006
408 	 327 	 AA11_pssm_16 	 -0.006
409 	 456 	 AA15_Codon diversity 	 -0.006
410 	 3 	 AA1_pssm_2 	 -0.006
411 	 614 	 AA20_Polarity 	 -0.006
412 	 195 	 AA7_pssm_8 	 -0.006
413 	 419 	 AA14_pssm_20 	 -0.006
414 	 345 	 AA12_pssm_8 	 -0.006
415 	 114 	 AA4_pssm_20 	 -0.006
416 	 61 	 AA2_Polarity 	 -0.006
417 	 556 	 AA19_pssm_2 	 -0.006
418 	 333 	 AA11_ss_2 	 -0.006
419 	 526 	 AA18_pssm_3 	 -0.006
420 	 325 	 AA11_pssm_14 	 -0.006
421 	 486 	 AA16_sa_2 	 -0.006
422 	 606 	 AA20_ss_1 	 -0.006
423 	 238 	 AA8_pssm_20 	 -0.006
424 	 175 	 AA6_pssm_19 	 -0.006
425 	 408 	 AA14_pssm_9 	 -0.006
426 	 601 	 AA20_pssm_16 	 -0.007
427 	 364 	 AA12_Electrostatic charge 	 -0.006
428 	 133 	 AA5_pssm_8 	 -0.007
429 	 296 	 AA10_pssm_16 	 -0.007
430 	 97 	 AA4_pssm_3 	 -0.007
431 	 332 	 AA11_ss_1 	 -0.007
432 	 65 	 AA3_pssm_2 	 -0.007
433 	 662 	 AA17_aa_frequency 	 -0.007
434 	 172 	 AA6_pssm_16 	 -0.007
435 	 574 	 AA19_pssm_20 	 -0.007
436 	 371 	 AA13_pssm_3 	 -0.007
437 	 17 	 AA1_pssm_16 	 -0.007
438 	 496 	 AA17_pssm_4 	 -0.007
439 	 252 	 AA9_pssm_3 	 -0.007
440 	 446 	 AA15_pssm_16 	 -0.007
441 	 197 	 AA7_pssm_10 	 -0.007
442 	 55 	 AA2_ss_3 	 -0.007
443 	 618 	 AA21_pssm_2 	 -0.007
444 	 425 	 AA14_Codon diversity 	 -0.007
445 	 232 	 AA8_pssm_14 	 -0.007
446 	 484 	 AA16_ss_3 	 -0.007
447 	 591 	 AA20_pssm_6 	 -0.007
448 	 397 	 AA13_Polarity 	 -0.007
449 	 43 	 AA2_pssm_11 	 -0.007
450 	 362 	 AA12_sa_2 	 -0.007
451 	 317 	 AA11_pssm_6 	 -0.007
452 	 247 	 AA8_Polarity 	 -0.007
453 	 596 	 AA20_pssm_11 	 -0.007
454 	 211 	 AA7_sa_1 	 -0.007
455 	 457 	 AA15_Electrostatic charge 	 -0.007
456 	 525 	 AA18_pssm_2 	 -0.007
457 	 561 	 AA19_pssm_7 	 -0.007
458 	 71 	 AA3_pssm_8 	 -0.007
459 	 321 	 AA11_pssm_10 	 -0.007
460 	 185 	 AA6_Polarity 	 -0.007
461 	 641 	 AA21_sa_2 	 -0.007
462 	 411 	 AA14_pssm_12 	 -0.007
463 	 4 	 AA1_pssm_3 	 -0.007
464 	 241 	 AA8_ss_3 	 -0.007
465 	 477 	 AA16_pssm_16 	 -0.007
466 	 154 	 AA5_Polarity 	 -0.007
467 	 508 	 AA17_pssm_16 	 -0.007
468 	 273 	 AA9_sa_1 	 -0.007
469 	 384 	 AA13_pssm_16 	 -0.007
470 	 577 	 AA19_ss_3 	 -0.007
471 	 52 	 AA2_pssm_20 	 -0.007
472 	 340 	 AA12_pssm_3 	 -0.007
473 	 203 	 AA7_pssm_16 	 -0.007
474 	 423 	 AA14_sa_1 	 -0.007
475 	 288 	 AA10_pssm_8 	 -0.007
476 	 610 	 AA20_sa_2 	 -0.007
477 	 645 	 AA21_Polarity 	 -0.007
478 	 117 	 AA4_ss_3 	 -0.007
479 	 258 	 AA9_pssm_9 	 -0.007
480 	 583 	 AA19_Polarity 	 -0.007
481 	 38 	 AA2_pssm_6 	 -0.007
482 	 92 	 AA3_Polarity 	 -0.007
483 	 455 	 AA15_sa_2 	 -0.007
484 	 302 	 AA10_ss_2 	 -0.007
485 	 481 	 AA16_pssm_20 	 -0.007
486 	 145 	 AA5_pssm_20 	 -0.007
487 	 494 	 AA17_pssm_2 	 -0.007
488 	 330 	 AA11_pssm_19 	 -0.007
489 	 221 	 AA8_pssm_3 	 -0.008
490 	 289 	 AA10_pssm_9 	 -0.008
491 	 502 	 AA17_pssm_10 	 -0.008
492 	 605 	 AA20_pssm_20 	 -0.008
493 	 56 	 AA2_sa_1 	 -0.008
494 	 105 	 AA4_pssm_11 	 -0.008
495 	 409 	 AA14_pssm_10 	 -0.008
496 	 490 	 AA16_Polarity 	 -0.008
497 	 198 	 AA7_pssm_11 	 -0.008
498 	 158 	 AA6_pssm_2 	 -0.008
499 	 301 	 AA10_ss_1 	 -0.008
500 	 7 	 AA1_pssm_6 	 -0.008
501 	 79 	 AA3_pssm_16 	 -0.008
502 	 131 	 AA5_pssm_6 	 -0.008
503 	 624 	 AA21_pssm_8 	 -0.008
504 	 422 	 AA14_ss_3 	 -0.008
505 	 269 	 AA9_pssm_20 	 -0.008
506 	 315 	 AA11_pssm_4 	 -0.008
507 	 179 	 AA6_ss_3 	 -0.008
508 	 432 	 AA15_pssm_2 	 -0.008
509 	 560 	 AA19_pssm_6 	 -0.008
510 	 9 	 AA1_pssm_8 	 -0.008
511 	 530 	 AA18_pssm_7 	 -0.008
512 	 87 	 AA3_sa_1 	 -0.008
513 	 374 	 AA13_pssm_6 	 -0.008
514 	 196 	 AA7_pssm_9 	 -0.008
515 	 53 	 AA2_ss_1 	 -0.008
516 	 257 	 AA9_pssm_8 	 -0.008
517 	 515 	 AA17_ss_3 	 -0.008
518 	 35 	 AA2_pssm_3 	 -0.008
519 	 473 	 AA16_pssm_12 	 -0.008
520 	 166 	 AA6_pssm_10 	 -0.008
521 	 390 	 AA13_ss_2 	 -0.008
522 	 230 	 AA8_pssm_12 	 -0.008
523 	 521 	 AA17_Polarity 	 -0.008
524 	 402 	 AA14_pssm_3 	 -0.008
525 	 627 	 AA21_pssm_11 	 -0.008
526 	 441 	 AA15_pssm_11 	 -0.008
527 	 283 	 AA10_pssm_3 	 -0.008
528 	 30 	 AA1_Polarity 	 -0.008
529 	 101 	 AA4_pssm_7 	 -0.008
530 	 579 	 AA19_sa_2 	 -0.008
531 	 191 	 AA7_pssm_4 	 -0.008
532 	 348 	 AA12_pssm_11 	 -0.008
533 	 388 	 AA13_pssm_20 	 -0.008
534 	 255 	 AA9_pssm_6 	 -0.008
535 	 136 	 AA5_pssm_11 	 -0.008
536 	 305 	 AA10_sa_2 	 -0.008
537 	 339 	 AA12_pssm_2 	 -0.009
538 	 547 	 AA18_sa_1 	 -0.009
539 	 575 	 AA19_ss_1 	 -0.009
540 	 67 	 AA3_pssm_4 	 -0.009
541 	 278 	 AA9_Polarity 	 -0.009
542 	 149 	 AA5_sa_1 	 -0.009
543 	 626 	 AA21_pssm_10 	 -0.009
544 	 533 	 AA18_pssm_10 	 -0.009
545 	 593 	 AA20_pssm_8 	 -0.009
546 	 271 	 AA9_ss_2 	 -0.009
547 	 207 	 AA7_pssm_20 	 -0.009
548 	 406 	 AA14_pssm_7 	 -0.009
549 	 438 	 AA15_pssm_8 	 -0.009
550 	 222 	 AA8_pssm_4 	 -0.009
551 	 100 	 AA4_pssm_6 	 -0.009
552 	 180 	 AA6_sa_1 	 -0.009
553 	 467 	 AA16_pssm_6 	 -0.009
554 	 189 	 AA7_pssm_2 	 -0.009
555 	 504 	 AA17_pssm_12 	 -0.009
556 	 391 	 AA13_ss_3 	 -0.009
557 	 622 	 AA21_pssm_6 	 -0.009
558 	 74 	 AA3_pssm_11 	 -0.009
559 	 531 	 AA18_pssm_8 	 -0.009
560 	 597 	 AA20_pssm_12 	 -0.009
561 	 129 	 AA5_pssm_4 	 -0.009
562 	 42 	 AA2_pssm_10 	 -0.009
563 	 167 	 AA6_pssm_11 	 -0.009
564 	 503 	 AA17_pssm_11 	 -0.009
565 	 102 	 AA4_pssm_8 	 -0.009
566 	 8 	 AA1_pssm_7 	 -0.009
567 	 375 	 AA13_pssm_7 	 -0.009
568 	 565 	 AA19_pssm_11 	 -0.009
569 	 282 	 AA10_pssm_2 	 -0.009
570 	 146 	 AA5_ss_1 	 -0.009
571 	 436 	 AA15_pssm_6 	 -0.009
572 	 410 	 AA14_pssm_11 	 -0.009
573 	 36 	 AA2_pssm_4 	 -0.009
574 	 465 	 AA16_pssm_4 	 -0.009
575 	 517 	 AA17_sa_2 	 -0.009
576 	 162 	 AA6_pssm_6 	 -0.009
577 	 11 	 AA1_pssm_10 	 -0.009
578 	 589 	 AA20_pssm_4 	 -0.009
579 	 259 	 AA9_pssm_10 	 -0.009
580 	 529 	 AA18_pssm_6 	 -0.009
581 	 135 	 AA5_pssm_10 	 -0.009
582 	 558 	 AA19_pssm_4 	 -0.009
583 	 69 	 AA3_pssm_6 	 -0.009
584 	 104 	 AA4_pssm_10 	 -0.009
585 	 513 	 AA17_ss_1 	 -0.009
586 	 220 	 AA8_pssm_2 	 -0.009
587 	 392 	 AA13_sa_1 	 -0.009
588 	 210 	 AA7_ss_3 	 -0.009
589 	 472 	 AA16_pssm_11 	 -0.010
590 	 620 	 AA21_pssm_4 	 -0.010
591 	 256 	 AA9_pssm_7 	 -0.010
592 	 534 	 AA18_pssm_11 	 -0.010
593 	 84 	 AA3_ss_1 	 -0.010
594 	 341 	 AA12_pssm_4 	 -0.010
595 	 440 	 AA15_pssm_10 	 -0.010
596 	 228 	 AA8_pssm_10 	 -0.010
597 	 5 	 AA1_pssm_4 	 -0.010
598 	 405 	 AA14_pssm_6 	 -0.010
599 	 194 	 AA7_pssm_7 	 -0.010
600 	 323 	 AA11_pssm_12 	 -0.010
601 	 287 	 AA10_pssm_7 	 -0.010
602 	 98 	 AA4_pssm_4 	 -0.010
603 	 137 	 AA5_pssm_12 	 -0.010
604 	 389 	 AA13_ss_1 	 -0.010
605 	 347 	 AA12_pssm_10 	 -0.010
606 	 485 	 AA16_sa_1 	 -0.010
607 	 70 	 AA3_pssm_7 	 -0.010
608 	 566 	 AA19_pssm_12 	 -0.010
609 	 224 	 AA8_pssm_6 	 -0.010
610 	 535 	 AA18_pssm_12 	 -0.010
611 	 73 	 AA3_pssm_10 	 -0.010
612 	 468 	 AA16_pssm_7 	 -0.010
613 	 434 	 AA15_pssm_4 	 -0.010
614 	 163 	 AA6_pssm_7 	 -0.010
615 	 623 	 AA21_pssm_7 	 -0.010
616 	 44 	 AA2_pssm_12 	 -0.010
617 	 343 	 AA12_pssm_6 	 -0.010
618 	 544 	 AA18_ss_1 	 -0.010
619 	 372 	 AA13_pssm_4 	 -0.011
620 	 13 	 AA1_pssm_12 	 -0.011
621 	 177 	 AA6_ss_1 	 -0.011
622 	 564 	 AA19_pssm_10 	 -0.011
623 	 193 	 AA7_pssm_6 	 -0.011
624 	 284 	 AA10_pssm_4 	 -0.011
625 	 261 	 AA9_pssm_12 	 -0.011
626 	 592 	 AA20_pssm_7 	 -0.011
627 	 628 	 AA21_pssm_12 	 -0.011
628 	 420 	 AA14_ss_1 	 -0.011
629 	 160 	 AA6_pssm_4 	 -0.011
630 	 115 	 AA4_ss_1 	 -0.011
631 	 253 	 AA9_pssm_4 	 -0.011
632 	 225 	 AA8_pssm_7 	 -0.011
633 	 527 	 AA18_pssm_4 	 -0.011
634 	 286 	 AA10_pssm_6 	 -0.012
635 	 380 	 AA13_pssm_12 	 -0.012
636 	 403 	 AA14_pssm_4 	 -0.012
637 	 482 	 AA16_ss_1 	 -0.012
638 	 132 	 AA5_pssm_7 	 -0.012
639 	 168 	 AA6_pssm_12 	 -0.012
640 	 499 	 AA17_pssm_7 	 -0.012
641 	 239 	 AA8_ss_1 	 -0.012
642 	 39 	 AA2_pssm_7 	 -0.012
643 	 616 	 AA21_disorder 	 -0.012
644 	 63 	 AA3_disorder 	 -0.012
645 	 349 	 AA12_pssm_12 	 -0.013
646 	 451 	 AA15_ss_1 	 -0.013
647 	 208 	 AA7_ss_1 	 -0.013
648 	 125 	 AA5_disorder 	 -0.013
649 	 1 	 AA1_disorder 	 -0.015
650 	 585 	 AA20_disorder 	 -0.015
651 	 94 	 AA4_disorder 	 -0.016
652 	 399 	 AA14_disorder 	 -0.017
653 	 156 	 AA6_disorder 	 -0.018
654 	 523 	 AA18_disorder 	 -0.018
655 	 32 	 AA2_disorder 	 -0.019
656 	 461 	 AA16_disorder 	 -0.020
657 	 187 	 AA7_disorder 	 -0.021
658 	 554 	 AA19_disorder 	 -0.021
659 	 368 	 AA13_disorder 	 -0.022
660 	 337 	 AA12_disorder 	 -0.023
661 	 218 	 AA8_disorder 	 -0.023
662 	 430 	 AA15_disorder 	 -0.024
663 	 280 	 AA10_disorder 	 -0.025
664 	 492 	 AA17_disorder 	 -0.025
665 	 249 	 AA9_disorder 	 -0.026
666 	 311 	 AA11_disorder 	 -0.027


 *** This program and the respective minimum Redundancy Maximum Relevance (mRMR) 
     algorithm were developed by Hanchuan Peng <hanchuan.peng@gmail.com>for
     the paper 
     "Feature selection based on mutual information: criteria of 
      max-dependency, max-relevance, and min-redundancy,"
      Hanchuan Peng, Fuhui Long, and Chris Ding, 
      IEEE Transactions on Pattern Analysis and Machine Intelligence,
      Vol. 27, No. 8, pp.1226-1238, 2005.
